# Supplementary material for: Flux balance modelling to predict bacterial survival during pulsed activity events
Source: Copernicus journal article supplement (doi:10.5194/bg-2017-403), 2017-10-19
Supplement: Supplementary file 2 [file Supplementary 2 iNJ1153.xls]

## Sheet: ReadMe
Worksheet Details
Reactions
	symbol	Meaning
	[c]	located in the cytoplasm
	[e]	located in the extracellular space
	-->	irreversible reaction
	<==>	reversible reaction
	EX_	exchange reaction
	Term	Meaning
	Reaction	ModelSEED reaction ID
	EC Number	Associated Enzyme ID
	KEGG ID	Reaction as listed in the KEGG database
	LB	The minimal value that the reaction can have during a simulation
	UB	The maximal value that the reaction can have during a simulation
	Reversible	1 if the reaction is reversible, 0 if it is irreverisible
	Objective	Denotes the linear combination of reactions that were optimized for in the simulation (max biomass for all)
Compounds
	symbol	Meaning
	PRS	Protein
	R	Generic Compound
Genes
	field	Meaning
	IMG ID	JGI assigned gene ID
	PEG ID	Model SEED assigned gene ID
GPR
	Associations are given as Boolean Rules
	Rule	Meaning
	||	denotes that one or the other of the genes inside a set of brackets are needed for a functional enzyme
	&	denotes that both of the genes inside a set of brackets are needed for a functional enzyme
	Confidence Assignments
	Rule	Meaning
	1	Not annotated within the genome, but necessary for growth under minimal media
	2	Automatically annotated
	3	Manually annotated
	0	exchange or sink reaction
Media
	symbol	Meaning
	X	May vary depending on user input.
BOF
	Term	Meaning
	BOF	Biomass Objective Function
Simulation Constraints
	Description
	List of different combinations of constraints imposed during FBA
Opt_Flux
	light growth condition refers to a CO2 flux of -372 umol/day/g biomass
	dark growth condition refers to a CO2 flux of 173 umol/day/g biomass
	all distributions are optimized for maximal flux through the biomass objective function
	"EX_" denotes that a reaction is an exchange flux (ie. entering or leaving the system; specifically, the extracellular space)
Annotation Summary
	Summary of gene annotations. More detail found in appendix

## Sheet: Reactions
Reaction	E.C. Number	KEGG ID	EQUATION (with names)	Equations (with IDs)		LB	UB	Reversible	objective
rxn02320	2.6.1.9	R03243	(1.00)L-histidinol-phosphate+(1.00)2-Oxoglutarate<=>(1.00)L-Glutamate+(1.00)imidazole_acetol-phosphate	(1.00)cpd00807[c]+(1.00)cpd00024[c]<=>(1.00)cpd00023[c]+(1.00)cpd00930[c]		-1000	1000	1	0
rxn12008	2.5.1.-	R05611	(1.00)Farnesylfarnesylgeraniol+(1.00)PPi<=>(1.00)Isopentenyldiphosphate+(1.00)all-trans-Heptaprenyl_diphosphate	(1.00)cpd02557[c]+(1.00)cpd00012[c]<=>(1.00)cpd00113[c]+(1.00)cpd02590[c]		-1000	0	0	0
rxn00882	3.1.3.25	R01186	(1.00)Inositol_4-phosphate+(1.00)H2O<=>(1.00)Phosphate+(1.00)H++(1.00)L-Inositol	(1.00)cpd02230[c]+(1.00)cpd00001[c]<=>(1.00)cpd00009[c]+(1.00)cpd00067[c]+(1.00)cpd00121[c]		0	1000	0	0
rxn08977	1.6.99.6		(1.00)NADPH+(1.00)H++(1.00)Ubiquinone-8<=>(1.00)Ubiquinol-8+(1.00)NADP	(1.00)cpd00005[c]+(1.00)cpd00067[c]+(1.00)cpd15560[c]<=>(1.00)cpd15561[c]+(1.00)cpd00006[c]		0	0	0	0
rxn01257	2.6.1.85	R01716	(1.00)L-Glutamine+(1.00)Chorismate<=>(1.00)ADC+(1.00)L-Glutamate	(1.00)cpd00053[c]+(1.00)cpd00216[c]<=>(1.00)cpd08210[c]+(1.00)cpd00023[c]		-1000	1000	1	0
rxn05029	2.5.1.17	R07268	(1.00)ATP+(1.00)Cobinamide<=>(1.00)Triphosphate+(1.00)Adenosyl_cobinamide	(1.00)cpd00002[c]+(1.00)cpd03422[c]<=>(1.00)cpd00421[c]+(1.00)cpd03918[c]		0	1000	1	0
rxn00541	4.1.2.5	R00751	(1.00)L-Threonine<=>(1.00)Glycine+(1.00)Acetaldehyde	(1.00)cpd00161[c]<=>(1.00)cpd00033[c]+(1.00)cpd00071[c]		-1000	1000	1	0
rxn00225	2.7.2.1	R00315	(1.00)Acetate+(1.00)H++(1.00)ATP<=>(1.00)Acetylphosphate+(1.00)ADP	(1.00)cpd00029[c]+(1.00)cpd00067[c]+(1.00)cpd00002[c]<=>(1.00)cpd00196[c]+(1.00)cpd00008[c]		0	1000	1	0
rxn05401	1.1.1.0		(1.00)NADPH+(1.00)13-methyl-3-oxo-tetra-decanoyl-ACP+(1.00)H+<=>(1.00)13-methyl-3-hydroxy-tetra-decanoyl-ACP+(1.00)NADP	(1.00)cpd00005[c]+(1.00)cpd11537[c]+(1.00)cpd00067[c]<=>(1.00)cpd11538[c]+(1.00)cpd00006[c]		-1000	1000	1	0
rxn02518	3.6.1.19	R03531	(1.00)H2O+(1.00)dITP<=>(1.00)dIMP+(1.00)PPi	(1.00)cpd00001[c]+(1.00)cpd00977[c]<=>(1.00)cpd03704[c]+(1.00)cpd00012[c]		0	1000	0	0
rxn01265	2.4.2.11	R01724	(1.00)PPi+(1.00)Nicotinate_ribonucleotide<=>(1.00)PRPP+(1.00)H++(1.00)Niacin	(1.00)cpd00012[c]+(1.00)cpd00873[c]<=>(1.00)cpd00103[c]+(1.00)cpd00067[c]+(1.00)cpd00218[c]		-1000	1000	1	0
rxn10126	Undetermined		(1.00)FADH2+(1.00)Ubiquinone-8<=>(1.00)Ubiquinol-8+(1.00)FAD	(1.00)cpd00982[c]+(1.00)cpd15560[c]<=>(1.00)cpd15561[c]+(1.00)cpd00015[c]		0	0	0	0
rxn10215	2.3.1.51		(1.00)1-anteisoheptadecanoyl-sn-glycerol_3-phosphate+(1.00)fa12coa<=>(1.00)CoA+(1.00)1,2-dianteisoheptadecanoyl-sn-glycerol_3-phosphate	(1.00)cpd15672[c]+(1.00)cpd11434[c]<=>(1.00)cpd00010[c]+(1.00)cpd15678[c]		0	1000	0	0
rxn01740	1.1.1.25	R02413	(1.00)NADP+(1.00)Shikimate<=>(1.00)3-Dehydroshikimate+(1.00)NADPH+(1.00)H+	(1.00)cpd00006[c]+(1.00)cpd00383[c]<=>(1.00)cpd01716[c]+(1.00)cpd00005[c]+(1.00)cpd00067[c]		-1000	1000	1	0
rxn03535	2.5.1.17	R05220	(1.00)ATP+(1.00)Cob(I)yrinate_diamide<=>(1.00)Triphosphate+(1.00)Adenosyl_cobyrinate diamide	(1.00)cpd00002[c]+(1.00)cpd03915[c]<=>(1.00)cpd00421[c]+(1.00)cpd03916[c]		0	1000	1	0
rxn00785	2.2.1.1	R01830	(1.00)D-fructose-6-phosphate+(1.00)Glyceraldehyde3-phosphate<=>(1.00)D-Xylulose5-phosphate+(1.00)D-Erythrose4-phosphate	(1.00)cpd00072[c]+(1.00)cpd00102[c]<=>(1.00)cpd00198[c]+(1.00)cpd00236[c]		-1000	1000	1	0
rxn05092	1.13.11.54	R07364	(1.00)O2+(1.00)1,2-dihydroxy-3-keto-5-methylthiopentene<=>(1.00)H++(1.00)4-methylthio_2-oxobutyrate+(1.00)Formate	(1.00)cpd00007[c]+(1.00)cpd11255[c]<=>(1.00)cpd00067[c]+(1.00)cpd00869[c]+(1.00)cpd00047[c]		0	1000	0	0
rxn08548	2.3.1.15		(1.00)Tetradecenoyl-ACP+(1.00)Glycerol-3-phosphate<=>(1.00)1-tetradec-7-enoyl-sn-glycerol_3-phosphate+(1.00)ACP	(1.00)cpd15294[c]+(1.00)cpd00080[c]<=>(1.00)cpd15330[c]+(1.00)cpd11493[c]		0	1000	0	0
rxn00802	4.3.2.1	R01086	(1.00)L-Argininosuccinate<=>(1.00)Fumarate+(1.00)L-Arginine	(1.00)cpd02152[c]<=>(1.00)cpd00106[c]+(1.00)cpd00051[c]		-1000	1000	1	0
rxn03638	2.3.1.157	R05332	(1.00)D-Glucosamine1-phosphate+(1.00)Acetyl-CoA<=>(1.00)H++(1.00)N-Acetyl-D-glucosamine1-phosphate+(1.00)CoA	(1.00)cpd03671[c]+(1.00)cpd00022[c]<=>(1.00)cpd00067[c]+(1.00)cpd02611[c]+(1.00)cpd00010[c]		0	1000	0	0
rxn08546	2.3.1.15		(1.00)Dodecanoyl-ACP+(1.00)Glycerol-3-phosphate<=>(1.00)1-dodecanoyl-sn-glycerol_3-phosphate+(1.00)ACP	(1.00)cpd11468[c]+(1.00)cpd00080[c]<=>(1.00)cpd15325[c]+(1.00)cpd11493[c]		0	1000	0	0
rxn07587	no match	R07773	(1.00)S-Adenosyl-L-methionine+(1.00)Cobalt-precorrin_5B<=>(1.00)H++(1.00)S-Adenosyl-homocysteine+(1.00)Cobalt-precorrin_6	(1.00)cpd00017[c]+(1.00)cpd14960[c]<=>(1.00)cpd00067[c]+(1.00)cpd00019[c]+(1.00)cpd08372[c]		-1000	1000	1	0
rxn08127	no match		(1.00)Maltose+(1.00)Maltotetraose<=>(1.00)Maltopentaose+(1.00)D-Glucose	(1.00)cpd00179[c]+(1.00)cpd01399[c]<=>(1.00)cpd15495[c]+(1.00)cpd00027[c]		-1000	1000	1	0
rxn05323	1.3.1.9	R04966	(1.00)Myristoyl-ACP+(1.00)NAD<=>(1.00)H++(1.00)NADH+(1.00)(2E)-Tetradecenoyl-[acp]	(1.00)cpd11466[c]+(1.00)cpd00003[c]<=>(1.00)cpd00067[c]+(1.00)cpd00004[c]+(1.00)cpd11467[c]		-1000	0	0	0
rxn12847	3.4.11.2		(1.00)Gly-Tyr+(1.00)H2O<=>(1.00)Glycine+(1.00)L-Tyrosine	(1.00)cpd15606[c]+(1.00)cpd00001[c]<=>(1.00)cpd00033[c]+(1.00)cpd00069[c]		-1000	1000	1	0
rxn03084	6.3.5.3	R04463	(1.00)L-Glutamine+(1.00)N-Formyl-GAR+(1.00)H2O+(1.00)ATP<=>(1.00)Phosphate+(1.00)5-Phosphoribosylformylglycinamidine+(1.00)H++(1.00)ADP+(1.00)L-Glutamate	(1.00)cpd00053[c]+(1.00)cpd02678[c]+(1.00)cpd00001[c]+(1.00)cpd00002[c]<=>(1.00)cpd00009[c]+(1.00)cpd02826[c]+(1.00)cpd00067[c]+(1.00)cpd00008[c]+(1.00)cpd00023[c]		0	1000	0	0
rxn08083	2.3.1.51		(1.00)Dodecanoyl-ACP+(1.00)1-dodecanoyl-sn-glycerol_3-phosphate<=>(1.00)ACP+(1.00)1,2-didodecanoyl-sn-glycerol_3-phosphate	(1.00)cpd11468[c]+(1.00)cpd15325[c]<=>(1.00)cpd11493[c]+(1.00)cpd15521[c]		0	1000	0	0
rxn10195	3.6.3.40		(1.00)Peptidoglycan_polymer (n-1 subunits)+(1.00)Prenol-45n_teichoic acid-glucose substituted<=>(1.00)glycerol_teichoic acid (n=45), linked, glucose substituted+(1.00)Undecaprenylphosphate	(1.00)cpd15666[c]+(1.00)cpd15662[c]<=>(1.00)cpd15669[c]+(1.00)cpd00286[c]		-1000	1000	1	0
rxn05371	2.3.1.0		(1.00)H++(1.00)Malonyl-acyl-carrierprotein-+(1.00)8-methyl-decanoyl-ACP<=>(1.00)ACP+(1.00)10-methyl-3-oxo-dodecanoyl-ACP+(1.00)CO2	(1.00)cpd00067[c]+(1.00)cpd11492[c]+(1.00)cpd11507[c]<=>(1.00)cpd11493[c]+(1.00)cpd11508[c]+(1.00)cpd00011[c]		0	1000	0	0
rxn02507	4.1.1.48	R03508	(1.00)1-(2-carboxyphenylamino)-1-deoxyribulose_5-phosphate+(1.00)H+<=>(1.00)Indoleglycerol_phosphate+(1.00)H2O+(1.00)CO2	(1.00)cpd00956[c]+(1.00)cpd00067[c]<=>(1.00)cpd02210[c]+(1.00)cpd00001[c]+(1.00)cpd00011[c]		0	1000	0	0
rxn00011	1.2.4.1|2.2.1.6|4.1.1.1	R00014	(1.00)2-Hydroxyethyl-ThPP+(1.00)CO2<=>(1.00)H++(1.00)Pyruvate+(1.00)TPP	(1.00)cpd03049[c]+(1.00)cpd00011[c]<=>(1.00)cpd00067[c]+(1.00)cpd00020[c]+(1.00)cpd00056[c]		-1000	0	0	0
rxn00292	5.1.3.14	R00414	(1.00)UDP-N-acetylglucosamine+(1.00)H2O<=>(1.00)UDP+(1.00)N-Acetyl-D-mannosamine	(1.00)cpd00037[c]+(1.00)cpd00001[c]<=>(1.00)cpd00014[c]+(1.00)cpd00492[c]		0	1000	0	0
rxn05147	no match		(1.00)H2O+(1.00)ATP+(1.00)D-Glucose<=>(1.00)Phosphate+(1.00)H++(1.00)ADP+(1.00)D-Glucose	(1.00)cpd00001[c]+(1.00)cpd00002[c]+(1.00)cpd00027[e]<=>(1.00)cpd00009[c]+(1.00)cpd00067[c]+(1.00)cpd00008[c]+(1.00)cpd00027[c]		0	1000	0	0
rxn01675	2.7.7.24	R02328	(1.00)TTP+(1.00)Glucose-1-phosphate<=>(1.00)dTDPglucose+(1.00)PPi	(1.00)cpd00357[c]+(1.00)cpd00089[c]<=>(1.00)cpd00626[c]+(1.00)cpd00012[c]		-1000	1000	1	0
rxn03901	3.6.1.27	R05627	(1.00)Bactoprenyl_diphosphate+(1.00)H2O<=>(1.00)Phosphate+(1.00)H++(1.00)Undecaprenylphosphate	(1.00)cpd02229[c]+(1.00)cpd00001[c]<=>(1.00)cpd00009[c]+(1.00)cpd00067[c]+(1.00)cpd00286[c]		0	1000	0	0
rxn05252	6.2.1.3		(1.00)H++(1.00)fa11+(1.00)ATP+(1.00)CoA<=>(1.00)fa11coa+(1.00)PPi+(1.00)AMP	(1.00)cpd00067[c]+(1.00)cpd11431[c]+(1.00)cpd00002[c]+(1.00)cpd00010[c]<=>(1.00)cpd11432[c]+(1.00)cpd00012[c]+(1.00)cpd00018[c]		0	1000	0	0
rxn00083	1.6.1.1	R00112	(1.00)NADPH+(1.00)NAD<=>(1.00)NADH+(1.00)NADP	(1.00)cpd00005[c]+(1.00)cpd00003[c]<=>(1.00)cpd00004[c]+(1.00)cpd00006[c]		-1000	1000	1	0
rxn04161	2.5.1.62	R06284	(1.00)Phytyl_diphosphate+(1.00)Chlorophyllide<=>(1.00)PPi+(1.00)Chlorophyll_a	(1.00)cpd03214[c]+(1.00)cpd01449[c]<=>(1.00)cpd00012[c]+(1.00)cpd03148[c]		-1000	1000	1	0
rxn00016	3.2.1.52	R00022	(1.00)H2O+(1.00)Chitobiose<=>(2.00)N-Acetyl-D-glucosamine	(1.00)cpd00001[c]+(1.00)cpd01157[c]<=>(2.00)cpd00122[c]		0	1000	0	0
rxn05347	2.3.1.41	R04355	(1.00)H++(1.00)Malonyl-acyl-carrierprotein-+(1.00)Acetyl-ACP<=>(1.00)Acetoacetyl-ACP+(1.00)ACP+(1.00)CO2	(1.00)cpd00067[c]+(1.00)cpd11492[c]+(1.00)cpd11494[c]<=>(1.00)cpd11488[c]+(1.00)cpd11493[c]+(1.00)cpd00011[c]		0	1000	0	0
rxn05398	4.2.1.0		(1.00)11-methyl-3-hydroxy-dodecanoyl-ACP<=>(1.00)11-methyl-trans-dodec-2-enoyl-ACP+(1.00)H2O	(1.00)cpd11534[c]<=>(1.00)cpd11535[c]+(1.00)cpd00001[c]		-1000	1000	1	0
rxn12636	no match		(1.00)met-L-ala-L+(1.00)H++(1.00)H2O<=>(1.00)L-Alanine+(1.00)L-Methionine	(1.00)cpd11590[c]+(1.00)cpd00067[c]+(1.00)cpd00001[c]<=>(1.00)cpd00035[c]+(1.00)cpd00060[c]		-1000	1000	1	0
rxn05466	no match		(1.00)NH3<=>(1.00)NH3	(1.00)cpd00013[e]<=>(1.00)cpd00013[c]		-1000	1000	1	0
rxn08707	no match		(1.00)H2O+(1.00)Heme+(1.00)Farnesyldiphosphate<=>(1.00)hemeO+(1.00)PPi	(1.00)cpd00001[c]+(1.00)cpd00028[c]+(1.00)cpd00350[c]<=>(1.00)cpd11313[c]+(1.00)cpd00012[c]		-1000	1000	1	0
rxn00927	3.2.2.1	R01245	(1.00)Adenosine+(1.00)H2O<=>(1.00)Adenine+(1.00)D-Ribose	(1.00)cpd00182[c]+(1.00)cpd00001[c]<=>(1.00)cpd00128[c]+(1.00)cpd00105[c]		-1000	1000	1	0
rxn00416	6.3.5.4	R00578	(1.00)L-Glutamine+(1.00)L-Aspartate+(1.00)H2O+(1.00)ATP<=>(1.00)L-Asparagine+(1.00)PPi+(1.00)L-Glutamate+(1.00)AMP	(1.00)cpd00053[c]+(1.00)cpd00041[c]+(1.00)cpd00001[c]+(1.00)cpd00002[c]<=>(1.00)cpd00132[c]+(1.00)cpd00012[c]+(1.00)cpd00023[c]+(1.00)cpd00018[c]		0	1000	0	0
rxn05338	1.1.1.100|2.3.1.85|2.3.1.86	R04534	(1.00)(R)-3-Hydroxydecanoyl-[acyl-carrier_protein]+(1.00)NADP<=>(1.00)NADPH+(1.00)H++(1.00)3-oxodecanoyl-acp	(1.00)cpd11482[c]+(1.00)cpd00006[c]<=>(1.00)cpd00005[c]+(1.00)cpd00067[c]+(1.00)cpd11487[c]		-1000	1000	1	0
rxn03933	2.4.1.227	R05662	(1.00)MurAc(oyl-L-Ala-D-gamma-Glu-L-Lys-D-Ala-D-Ala)-diphospho-_undecaprenol+(1.00)UDP-N-acetylglucosamine<=>(1.00)UDP+(1.00)Undecaprenyl-diphospho-N-acetylmuramoyl-(N-acetylglucosamine)-L-alanyl-gamma-D-glutamyl-L-lysyl-D-alanyl-D-alanine	(1.00)cpd02948[c]+(1.00)cpd00037[c]<=>(1.00)cpd00014[c]+(1.00)cpd03491[c]		-1000	1000	1	0
rxn12644	no match		(1.00)H2O+(1.00)ala-L-Thr-L<=>(1.00)L-Threonine+(1.00)L-Alanine	(1.00)cpd00001[c]+(1.00)cpd11582[c]<=>(1.00)cpd00161[c]+(1.00)cpd00035[c]		-1000	1000	1	0
rxn05173	3.A.1.2		(1.00)L-Arabinose+(1.00)H2O+(1.00)ATP<=>(1.00)Phosphate+(1.00)H++(1.00)L-Arabinose+(1.00)ADP	(1.00)cpd00224[e]+(1.00)cpd00001[c]+(1.00)cpd00002[c]<=>(1.00)cpd00009[c]+(1.00)cpd00067[c]+(1.00)cpd00224[c]+(1.00)cpd00008[c]		0	1000	0	0
rxn00669	6.2.1.13	R00920	(1.00)ATP+(1.00)CoA+(1.00)Propionate<=>(1.00)Phosphate+(1.00)Propionyl-CoA+(1.00)ADP	(1.00)cpd00002[c]+(1.00)cpd00010[c]+(1.00)cpd00141[c]<=>(1.00)cpd00009[c]+(1.00)cpd00086[c]+(1.00)cpd00008[c]		0	1000	1	0
rxn09112	2.7.8.5		(1.00)CDP-1,2-dihexadec-9-enoylglycerol+(1.00)Glycerol-3-phosphate<=>(1.00)Phosphatidylglycerophosphate_dihexadec-9-enoyl+(1.00)CMP	(1.00)cpd15418[c]+(1.00)cpd00080[c]<=>(1.00)cpd15546[c]+(1.00)cpd00046[c]		-1000	1000	1	0
rxn05536	3.A.1.5|3.|.1.5		(1.00)met-L-ala-L+(1.00)H2O+(1.00)ATP<=>(1.00)Phosphate+(1.00)met-L-ala-L+(1.00)H++(1.00)ADP	(1.00)cpd11590[e]+(1.00)cpd00001[c]+(1.00)cpd00002[c]<=>(1.00)cpd00009[c]+(1.00)cpd11590[c]+(1.00)cpd00067[c]+(1.00)cpd00008[c]		0	1000	0	0
rxn05155	3.A.1.3		(1.00)L-Glutamine+(1.00)H2O+(1.00)ATP<=>(1.00)Phosphate+(1.00)L-Glutamine+(1.00)H++(1.00)ADP	(1.00)cpd00053[e]+(1.00)cpd00001[c]+(1.00)cpd00002[c]<=>(1.00)cpd00009[c]+(1.00)cpd00053[c]+(1.00)cpd00067[c]+(1.00)cpd00008[c]		0	1000	0	0
rxn04153	1.14.13.81	R06266	(1.00)NADPH+(1.00)H++(1.00)13(1)-Hydroxy-Mg-protoporphyrin_IX 13-monomethyl ester+(1.00)O2<=>(2.00)H2O+(1.00)13(1)-Oxo-Mg-protoporphyrin_IX 13-monomethyl ester+(1.00)NADP	(1.00)cpd00005[c]+(1.00)cpd00067[c]+(1.00)cpd08629[c]+(1.00)cpd00007[c]<=>(2.00)cpd00001[c]+(1.00)cpd08630[c]+(1.00)cpd00006[c]		-1000	1000	1	0
rxn01111	2.7.1.19	R01523	(1.00)ATP+(1.00)D-Ribulose5-phosphate<=>(1.00)D-Ribulose_1,5-bisphosphate+(1.00)ADP	(1.00)cpd00002[c]+(1.00)cpd00171[c]<=>(1.00)cpd00871[c]+(1.00)cpd00008[c]		0	1000	1	0
rxn01513	2.7.4.9	R02094	(1.00)dTMP+(1.00)ATP<=>(1.00)dTDP+(1.00)ADP	(1.00)cpd00298[c]+(1.00)cpd00002[c]<=>(1.00)cpd00297[c]+(1.00)cpd00008[c]		0	1000	1	0
rxn05537	3.A.1.5|3.|.1.5		(1.00)gly-asp-L+(1.00)H2O+(1.00)ATP<=>(1.00)Phosphate+(1.00)H++(1.00)gly-asp-L+(1.00)ADP	(1.00)cpd11589[e]+(1.00)cpd00001[c]+(1.00)cpd00002[c]<=>(1.00)cpd00009[c]+(1.00)cpd00067[c]+(1.00)cpd11589[c]+(1.00)cpd00008[c]		0	1000	0	0
rxn10209	2.3.1.15		(1.00)Glycerol-3-phosphate+(1.00)fa4coa<=>(1.00)1-anteisopentadecanoyl-sn-glycerol_3-phosphate+(1.00)CoA	(1.00)cpd00080[c]+(1.00)cpd11439[c]<=>(1.00)cpd15675[c]+(1.00)cpd00010[c]		0	1000	0	0
rxn00903	2.6.1.42	R01214	(1.00)2-Oxoglutarate+(1.00)L-Valine<=>(1.00)3-Methyl-2-oxobutanoate+(1.00)L-Glutamate	(1.00)cpd00024[c]+(1.00)cpd00156[c]<=>(1.00)cpd00123[c]+(1.00)cpd00023[c]		-1000	1000	1	0
rxn02476	2.5.1.19	R03460	(1.00)Phosphoenolpyruvate+(1.00)3-phosphoshikimate<=>(1.00)Phosphate+(1.00)5-O-1-Carboxyvinyl-3-phosphoshikimate+(1.00)H+	(1.00)cpd00061[c]+(1.00)cpd02030[c]<=>(1.00)cpd00009[c]+(1.00)cpd00932[c]+(1.00)cpd00067[c]		-1000	1000	1	0
rxn06729	2.3.1.129	R04567	(1.00)HMA+(1.00)UDP-N-acetylglucosamine<=>(1.00)UDP-3-O-(beta-hydroxymyristoyl)-N-acetylglucosamine+(1.00)ACP	(1.00)cpd11484[c]+(1.00)cpd00037[c]<=>(1.00)cpd02886[c]+(1.00)cpd11493[c]		0	1000	0	0
rxn00947	6.2.1.3	R01280	(1.00)H++(1.00)ATP+(1.00)Palmitate+(1.00)CoA<=>(1.00)Palmitoyl-CoA+(1.00)PPi+(1.00)AMP	(1.00)cpd00067[c]+(1.00)cpd00002[c]+(1.00)cpd00214[c]+(1.00)cpd00010[c]<=>(1.00)cpd00134[c]+(1.00)cpd00012[c]+(1.00)cpd00018[c]		0	1000	0	0
rxn01333	2.2.1.2	R01827	(1.00)Sedoheptulose7-phosphate+(1.00)Glyceraldehyde3-phosphate<=>(1.00)D-fructose-6-phosphate+(1.00)D-Erythrose4-phosphate	(1.00)cpd00238[c]+(1.00)cpd00102[c]<=>(1.00)cpd00072[c]+(1.00)cpd00236[c]		0	0	1	0
rxn03394	no match	R04987	(1.00)NADPH+(1.00)H++(1.00)O2+(1.00)2-Octaprenylphenol<=>(1.00)2-Octaprenyl-6-hydroxyphenol+(1.00)H2O+(1.00)NADP	(1.00)cpd00005[c]+(1.00)cpd00067[c]+(1.00)cpd00007[c]+(1.00)cpd03444[c]<=>(1.00)cpd03445[c]+(1.00)cpd00001[c]+(1.00)cpd00006[c]		0	1000	0	0
rxn01870	4.1.2.13	R02568	(1.00)D-fructose-1-phosphate<=>(1.00)Glycerone-phosphate+(1.00)D-Glyceraldehyde	(1.00)cpd00802[c]<=>(1.00)cpd00095[c]+(1.00)cpd00448[c]		-1000	1000	1	0
rxn05333	2.3.1.85|2.3.1.86|4.2.1.58|4.2.1.60|4.2.1.61	R04535	(1.00)(R)-3-Hydroxydecanoyl-[acyl-carrier_protein]<=>(1.00)(2E)-Decenoyl-[acp]+(1.00)H2O	(1.00)cpd11482[c]<=>(1.00)cpd11475[c]+(1.00)cpd00001[c]		-1000	1000	1	0
rxn01387	1.1.1.42	R01899	(1.00)Isocitrate+(1.00)NADP<=>(1.00)Oxalosuccinate+(1.00)NADPH+(1.00)H+	(1.00)cpd00260[c]+(1.00)cpd00006[c]<=>(1.00)cpd03187[c]+(1.00)cpd00005[c]+(1.00)cpd00067[c]		-1000	1000	1	0
rxn04954	1.5.1.20	R07168	(1.00)5-Methyltetrahydrofolate+(1.00)NAD<=>(1.00)H++(1.00)NADH+(1.00)5-10-Methylenetetrahydrofolate	(1.00)cpd00345[c]+(1.00)cpd00003[c]<=>(1.00)cpd00067[c]+(1.00)cpd00004[c]+(1.00)cpd00125[c]		-1000	1000	1	0
rxn01575	2.6.1.42	R02199	(1.00)2-Oxoglutarate+(1.00)L-Isoleucine<=>(1.00)3MOP+(1.00)L-Glutamate	(1.00)cpd00024[c]+(1.00)cpd00322[c]<=>(1.00)cpd00508[c]+(1.00)cpd00023[c]		-1000	1000	1	0
rxn01506	5.1.3.9	R02087	(1.00)N-Acetyl-D-glucosamine_6-phosphate<=>(1.00)N-Acetylmannosamine_6-phosphate	(1.00)cpd00293[c]<=>(1.00)cpd02612[c]		-1000	1000	1	0
rxn05400	2.3.1.0		(1.00)H++(1.00)Malonyl-acyl-carrierprotein-+(1.00)11-methyl-dodecanoyl-ACP<=>(1.00)13-methyl-3-oxo-tetra-decanoyl-ACP+(1.00)ACP+(1.00)CO2	(1.00)cpd00067[c]+(1.00)cpd11492[c]+(1.00)cpd11536[c]<=>(1.00)cpd11537[c]+(1.00)cpd11493[c]+(1.00)cpd00011[c]		0	1000	0	0
rxn08088	2.3.1.51		(1.00)Octadecanoyl-ACP+(1.00)1-octadecanoyl-sn-glycerol_3-phosphate<=>(1.00)1,2-dioctadecanoyl-sn-glycerol_3-phosphate+(1.00)ACP	(1.00)cpd15268[c]+(1.00)cpd15329[c]<=>(1.00)cpd15526[c]+(1.00)cpd11493[c]		0	1000	0	0
rxn10343	no match		(1.00)H2O+(1.00)Hg2++(1.00)ATP<=>(1.00)Phosphate+(1.00)H++(1.00)Hg2++(1.00)ADP	(1.00)cpd00001[c]+(1.00)cpd00531[c]+(1.00)cpd00002[c]<=>(1.00)cpd00009[c]+(1.00)cpd00067[c]+(1.00)cpd00531[e]+(1.00)cpd00008[c]		0	1000	0	0
rxn05168	no match		(1.00)H2O+(1.00)ATP+(1.00)L-Valine<=>(1.00)Phosphate+(1.00)H++(1.00)ADP+(1.00)L-Valine	(1.00)cpd00001[c]+(1.00)cpd00002[c]+(1.00)cpd00156[e]<=>(1.00)cpd00009[c]+(1.00)cpd00067[c]+(1.00)cpd00008[c]+(1.00)cpd00156[c]		0	1000	0	0
rxn02342	1.2.4.1	R03270	(1.00)Lipoamide+(1.00)2-Hydroxyethyl-ThPP<=>(1.00)S-Acetyldihydrolipoamide+(1.00)TPP	(1.00)cpd00213[c]+(1.00)cpd03049[c]<=>(1.00)cpd00836[c]+(1.00)cpd00056[c]		-1000	1000	1	0
rxn10310	no match		(24.00)UDP-N-acetylglucosamine+(1.00)Isoheptadecanoyllipoteichoic_acid (n=24), linked, unsubstituted<=>(1.00)Isoheptadecanoyllipoteichoic_acid (n=24), linked, N-acetyl-D-glucosamine+(24.00)UDP	(24.00)cpd00037[c]+(1.00)cpd15749[c]<=>(1.00)cpd15767[c]+(24.00)cpd00014[c]		-1000	1000	1	0
rxn00781	1.2.1.12|1.2.1.59	R01061	(1.00)Phosphate+(1.00)Glyceraldehyde3-phosphate+(1.00)NAD<=>(1.00)NADH+(1.00)1,3-Bisphospho-D-glycerate	(1.00)cpd00009[c]+(1.00)cpd00102[c]+(1.00)cpd00003[c]<=>(1.00)cpd00004[c]+(1.00)cpd00203[c]		-1000	1000	1	0
rxn01133	2.3.1.79	R01556	(1.00)Maltose+(1.00)Acetyl-CoA<=>(1.00)Acetyl-maltose+(1.00)CoA	(1.00)cpd00179[c]+(1.00)cpd00022[c]<=>(1.00)cpd01441[c]+(1.00)cpd00010[c]		0	1000	0	0
rxn05442	1.3.1.0		(1.00)11-methyl-trans-dodec-2-enoyl-ACP+(1.00)H++(1.00)NADH<=>(1.00)11-methyl-dodecanoyl-ACP+(1.00)NAD	(1.00)cpd11535[c]+(1.00)cpd00067[c]+(1.00)cpd00004[c]<=>(1.00)cpd11536[c]+(1.00)cpd00003[c]		0	1000	0	0
rxn00973	4.2.1.3	R01324	(1.00)Citrate<=>(1.00)Isocitrate	(1.00)cpd00137[c]<=>(1.00)cpd00260[c]		-1000	1000	1	0
rxn00838	6.3.4.4	R01135	(1.00)L-Aspartate+(1.00)IMP+(1.00)GTP<=>(1.00)Phosphate+(2.00)H++(1.00)Adenylosuccinate+(1.00)GDP	(1.00)cpd00041[c]+(1.00)cpd00114[c]+(1.00)cpd00038[c]<=>(1.00)cpd00009[c]+(2.00)cpd00067[c]+(1.00)cpd02375[c]+(1.00)cpd00031[c]		0	1000	0	0
rxn02986	4.2.3.12	R04286	(1.00)7,8-Dihydroneopterin_3-triphosphate<=>(1.00)Triphosphate+(1.00)6-Pyruvoyltetrahydropterin+(1.00)H+	(1.00)cpd02978[c]<=>(1.00)cpd00421[c]+(1.00)cpd02315[c]+(1.00)cpd00067[c]		-1000	1000	1	0
rxn04705	1.3.1.75	R06896	(1.00)NADPH+(1.00)H++(1.00)Divinylprotochlorophyllide<=>(1.00)Protochlorophyllide+(1.00)NADP	(1.00)cpd00005[c]+(1.00)cpd00067[c]+(1.00)cpd08631[c]<=>(1.00)cpd01845[c]+(1.00)cpd00006[c]		-1000	1000	1	0
rxn00297	5.1.3.14	R00420	(1.00)UDP-N-acetylglucosamine<=>(1.00)UDP-N-acetyl-D-mannosamine	(1.00)cpd00037[c]<=>(1.00)cpd00861[c]		-1000	1000	1	0
rxn00065	4.6.1.1	R00089	(1.00)ATP<=>(1.00)PPi+(1.00)cAMP	(1.00)cpd00002[c]<=>(1.00)cpd00012[c]+(1.00)cpd00446[c]		0	1000	0	0
rxn05544	3.A.1.5|3.|.1.5		(1.00)H2O+(1.00)ATP+(1.00)Ala-Leu<=>(1.00)Phosphate+(1.00)H++(1.00)ADP+(1.00)Ala-Leu	(1.00)cpd00001[c]+(1.00)cpd00002[c]+(1.00)cpd11583[e]<=>(1.00)cpd00009[c]+(1.00)cpd00067[c]+(1.00)cpd00008[c]+(1.00)cpd11583[c]		0	1000	0	0
rxn00141	3.3.1.1	R00192	(1.00)H2O+(1.00)S-Adenosyl-homocysteine<=>(1.00)Adenosine+(1.00)Homocysteine	(1.00)cpd00001[c]+(1.00)cpd00019[c]<=>(1.00)cpd00182[c]+(1.00)cpd00135[c]		-1000	1000	1	0
rxn08291	no match		(1.00)D-Alanine+(1.00)H2O+(1.00)FAD<=>(1.00)NH3+(1.00)FADH2+(1.00)Pyruvate	(1.00)cpd00117[c]+(1.00)cpd00001[c]+(1.00)cpd00015[c]<=>(1.00)cpd00013[c]+(1.00)cpd00982[c]+(1.00)cpd00020[c]		-1000	1000	1	0
rxn05651	2.A.53|2.|.53		(1.00)H++(1.00)Sulfate<=>(1.00)H++(1.00)Sulfate	(1.00)cpd00067[e]+(1.00)cpd00048[e]<=>(1.00)cpd00067[c]+(1.00)cpd00048[c]		-1000	1000	1	0
rxn05330	2.3.1.85|2.3.1.86|4.2.1.58	R04954	(1.00)D-3-Hydroxyhexanoyl-[acp]<=>(1.00)H2O+(1.00)(2E)-Hexenoyl-[acp]	(1.00)cpd11479[c]<=>(1.00)cpd00001[c]+(1.00)cpd11473[c]		-1000	1000	1	0
rxn03910	4.6.1.12	R05637	(1.00)2-phospho-4-cytidine5-diphospho-2-C-methyl-D-erythritol<=>(1.00)2-C-methyl-D-erythritol2-4-cyclodiphosphate+(1.00)CMP	(1.00)cpd08288[c]<=>(1.00)cpd08301[c]+(1.00)cpd00046[c]		-1000	1000	1	0
rxn03492	1.3.1.54	R05150	(1.00)Precorrin_6B+(1.00)NADP<=>(1.00)NADPH+(1.00)H++(1.00)Precorrin_6A	(1.00)cpd03760[c]+(1.00)cpd00006[c]<=>(1.00)cpd00005[c]+(1.00)cpd00067[c]+(1.00)cpd03761[c]		-1000	1000	1	0
rxn00364	2.7.4.14	R00512	(1.00)ATP+(1.00)CMP<=>(1.00)CDP+(1.00)ADP	(1.00)cpd00002[c]+(1.00)cpd00046[c]<=>(1.00)cpd00096[c]+(1.00)cpd00008[c]		0	1000	1	0
rxn00775	3.6.1.13		(1.00)ADPribose+(1.00)H2O<=>(1.00)ribose-5-phosphate+(1.00)AMP	(1.00)cpd00251[c]+(1.00)cpd00001[c]<=>(1.00)cpd00101[c]+(1.00)cpd00018[c]		0	1000	0	0
rxn00303	2.7.6.5	R00429	(1.00)ATP+(1.00)GTP<=>(1.00)Guanosine_5-triphosphate,3-diphosphate+(1.00)AMP	(1.00)cpd00002[c]+(1.00)cpd00038[c]<=>(1.00)cpd02740[c]+(1.00)cpd00018[c]		0	1000	1	0
rxn05616	1.A.35|1.|.35		(1.00)Mg<=>(1.00)Mg	(1.00)cpd00254[c]<=>(1.00)cpd00254[e]		-1000	1000	1	0
rxn00816	no match	R01100	(1.00)LACT+(1.00)H2O<=>(1.00)Galactose+(1.00)D-Glucose	(1.00)cpd00208[c]+(1.00)cpd00001[c]<=>(1.00)cpd00108[c]+(1.00)cpd00027[c]		-1000	1000	1	0
rxn02716	1.3.1.33	R03845	(1.00)Chlorophyllide+(1.00)NADP<=>(1.00)NADPH+(2.00)H++(1.00)Protochlorophyllide	(1.00)cpd01449[c]+(1.00)cpd00006[c]<=>(1.00)cpd00005[c]+(2.00)cpd00067[c]+(1.00)cpd01845[c]		-1000	1000	1	0
rxn00515	2.7.4.6	R00722	(1.00)ATP+(1.00)IDP<=>(1.00)ITP+(1.00)ADP	(1.00)cpd00002[c]+(1.00)cpd00090[c]<=>(1.00)cpd00068[c]+(1.00)cpd00008[c]		0	1000	1	0
rxn01025	3.5.4.1	R01411	(1.00)H++(1.00)H2O+(1.00)5-Methylcytosine<=>(1.00)NH3+(1.00)Thymine	(1.00)cpd00067[c]+(1.00)cpd00001[c]+(1.00)cpd01587[c]<=>(1.00)cpd00013[c]+(1.00)cpd00151[c]		0	1000	0	0
rxn05425	2.3.1.0		(1.00)H++(1.00)Malonyl-acyl-carrierprotein-+(1.00)10-methyl-undecanoyl-ACP<=>(1.00)ACP+(1.00)12-methyl-3-oxo-tridecanoyl-ACP+(1.00)CO2	(1.00)cpd00067[c]+(1.00)cpd11492[c]+(1.00)cpd11561[c]<=>(1.00)cpd11493[c]+(1.00)cpd11562[c]+(1.00)cpd00011[c]		0	1000	0	0
rxn01434	6.3.4.5	R01954	(1.00)L-Aspartate+(1.00)ATP+(1.00)Citrulline<=>(1.00)PPi+(1.00)L-Argininosuccinate+(1.00)AMP	(1.00)cpd00041[c]+(1.00)cpd00002[c]+(1.00)cpd00274[c]<=>(1.00)cpd00012[c]+(1.00)cpd02152[c]+(1.00)cpd00018[c]		0	1000	1	0
rxn00695	2.7.7.27	R00948	(1.00)ATP+(1.00)Glucose-1-phosphate<=>(1.00)ADPglucose+(1.00)PPi	(1.00)cpd00002[c]+(1.00)cpd00089[c]<=>(1.00)cpd00387[c]+(1.00)cpd00012[c]		0	1000	1	0
rxn01134	5.4.99.16	R01557	(1.00)Maltose<=>(1.00)TRHL	(1.00)cpd00179[c]<=>(1.00)cpd00794[c]		-1000	1000	1	0
rxn00693	2.1.1.13	R00946	(1.00)5-Methyltetrahydrofolate+(1.00)Homocysteine<=>(1.00)Tetrahydrofolate+(1.00)L-Methionine	(1.00)cpd00345[c]+(1.00)cpd00135[c]<=>(1.00)cpd00087[c]+(1.00)cpd00060[c]		-1000	1000	1	0
rxn02011	6.3.2.13	R02788	(1.00)UDP-N-acetylmuramoyl-L-alanyl-D-glutamate+(1.00)meso-2,6-Diaminopimelate+(1.00)ATP<=>(1.00)Phosphate+(1.00)UDP-N-acetylmuramoyl-L-alanyl-D-gamma-glutamyl-meso-2-6-diaminopimelate+(1.00)H++(1.00)ADP	(1.00)cpd00525[c]+(1.00)cpd00516[c]+(1.00)cpd00002[c]<=>(1.00)cpd00009[c]+(1.00)cpd02964[c]+(1.00)cpd00067[c]+(1.00)cpd00008[c]		0	1000	0	0
rxn00702	2.7.7.33	R00956	(1.00)CTP+(1.00)Glucose-1-phosphate<=>(1.00)CDP-glucose+(1.00)PPi	(1.00)cpd00052[c]+(1.00)cpd00089[c]<=>(1.00)cpd00390[c]+(1.00)cpd00012[c]		-1000	1000	1	0
rxn02186	no match	R03051	(1.00)NADPH+(1.00)H++(1.00)ALCTT<=>(1.00)2,3-Dihydroxy-isovalerate+(1.00)NADP	(1.00)cpd00005[c]+(1.00)cpd00067[c]+(1.00)cpd00668[c]<=>(1.00)cpd02498[c]+(1.00)cpd00006[c]		-1000	1000	1	0
rxn00122	2.7.7.2	R00161	(1.00)FMN+(1.00)ATP<=>(1.00)PPi+(1.00)FAD	(1.00)cpd00050[c]+(1.00)cpd00002[c]<=>(1.00)cpd00012[c]+(1.00)cpd00015[c]		0	1000	0	0
rxn10202	2.3.1.15		(1.00)Palmitoyl-CoA+(1.00)Glycerol-3-phosphate<=>(1.00)1-hexadecanoyl-sn-glycerol_3-phosphate+(1.00)CoA	(1.00)cpd00134[c]+(1.00)cpd00080[c]<=>(1.00)cpd15327[c]+(1.00)cpd00010[c]		0	1000	0	0
rxn08527	no match		(1.00)Menaquinol_8+(1.00)Fumarate<=>(1.00)Menaquinone_8+(1.00)Succinate	(1.00)cpd15499[c]+(1.00)cpd00106[c]<=>(1.00)cpd15500[c]+(1.00)cpd00036[c]		-1000	1000	1	0
rxn12848	3.A.1.5		(1.00)H2O+(1.00)ATP+(1.00)Gly-Cys<=>(1.00)Phosphate+(1.00)H++(1.00)ADP+(1.00)Gly-Cys	(1.00)cpd00001[c]+(1.00)cpd00002[c]+(1.00)cpd15603[e]<=>(1.00)cpd00009[c]+(1.00)cpd00067[c]+(1.00)cpd00008[c]+(1.00)cpd15603[c]		0	1000	0	0
rxn00369	2.7.1.48	R00517	(1.00)Cytidine+(1.00)GTP<=>(1.00)CMP+(1.00)GDP	(1.00)cpd00367[c]+(1.00)cpd00038[c]<=>(1.00)cpd00046[c]+(1.00)cpd00031[c]		-1000	1000	1	0
rxn01116	5.1.3.1	R01529	(1.00)D-Ribulose5-phosphate<=>(1.00)D-Xylulose5-phosphate	(1.00)cpd00171[c]<=>(1.00)cpd00198[c]		-1000	1000	1	0
rxn00337	2.7.2.4	R00480	(1.00)L-Aspartate+(1.00)H++(1.00)ATP<=>(1.00)ADP+(1.00)4-Phospho-L-aspartate	(1.00)cpd00041[c]+(1.00)cpd00067[c]+(1.00)cpd00002[c]<=>(1.00)cpd00008[c]+(1.00)cpd01977[c]		0	1000	1	0
rxn02212	4.2.3.4	R03083	(1.00)DAHP<=>(1.00)Phosphate+(1.00)H++(1.00)5-Dehydroquinate	(1.00)cpd02857[c]<=>(1.00)cpd00009[c]+(1.00)cpd00067[c]+(1.00)cpd00699[c]		0	1000	0	0
rxn03908	2.7.1.148	R05634	(1.00)4-cytidine5-diphospho-2-C-methyl-D-erythritol+(1.00)ATP<=>(1.00)2-phospho-4-cytidine5-diphospho-2-C-methyl-D-erythritol+(1.00)ADP	(1.00)cpd08287[c]+(1.00)cpd00002[c]<=>(1.00)cpd08288[c]+(1.00)cpd00008[c]		0	1000	1	0
rxn03419	3.5.4.16	R05046	(1.00)Formamidopyrimidine_nucleoside triphosphate+(1.00)H2O<=>(1.00)2,5-Diaminopyrimidine_nucleoside triphosphate+(1.00)H++(1.00)Formate	(1.00)cpd03518[c]+(1.00)cpd00001[c]<=>(1.00)cpd03519[c]+(1.00)cpd00067[c]+(1.00)cpd00047[c]		-1000	1000	1	0
rxn05408	2.3.1.0		(1.00)Isobutyryl-CoA+(1.00)ACP<=>(1.00)CoA+(1.00)isobutyryl-ACP	(1.00)cpd00481[c]+(1.00)cpd11493[c]<=>(1.00)cpd00010[c]+(1.00)cpd11545[c]		-1000	1000	1	0
rxn05436	1.3.1.0		(1.00)10-methyl-trans-dodec-2-enoyl-ACP+(1.00)H++(1.00)NADH<=>(1.00)10-methyl-dodecanoyl-ACP+(1.00)NAD	(1.00)cpd11510[c]+(1.00)cpd00067[c]+(1.00)cpd00004[c]<=>(1.00)cpd11511[c]+(1.00)cpd00003[c]		0	1000	0	0
rxn00917	6.3.5.2	R01231	(1.00)L-Glutamine+(1.00)XMP+(1.00)H2O+(1.00)ATP<=>(1.00)GMP+(1.00)H++(1.00)PPi+(1.00)L-Glutamate+(1.00)AMP	(1.00)cpd00053[c]+(1.00)cpd00497[c]+(1.00)cpd00001[c]+(1.00)cpd00002[c]<=>(1.00)cpd00126[c]+(1.00)cpd00067[c]+(1.00)cpd00012[c]+(1.00)cpd00023[c]+(1.00)cpd00018[c]		0	1000	0	0
rxn09113	2.7.8.5		(1.00)CDP-1,2-dioctadecanoylglycerol+(1.00)Glycerol-3-phosphate<=>(1.00)Phosphatidylglycerophosphate_dioctadecanoyl+(1.00)CMP	(1.00)cpd15421[c]+(1.00)cpd00080[c]<=>(1.00)cpd15547[c]+(1.00)cpd00046[c]		-1000	1000	1	0
rxn02160	3.1.3.15	R03013	(1.00)L-histidinol-phosphate+(1.00)H2O<=>(1.00)Phosphate+(1.00)H++(1.00)L-Histidinol	(1.00)cpd00807[c]+(1.00)cpd00001[c]<=>(1.00)cpd00009[c]+(1.00)cpd00067[c]+(1.00)cpd00641[c]		0	1000	0	0
rxn08551	2.3.1.15		(1.00)Octadecanoyl-ACP+(1.00)Glycerol-3-phosphate<=>(1.00)ACP+(1.00)1-octadecanoyl-sn-glycerol_3-phosphate	(1.00)cpd15268[c]+(1.00)cpd00080[c]<=>(1.00)cpd11493[c]+(1.00)cpd15329[c]		0	1000	0	0
rxn10125	no match		(2.00)H++(1.00)NADH+(1.00)NADP<=>(1.00)NADPH+(2.00)H++(1.00)NAD	(2.00)cpd00067[e]+(1.00)cpd00004[c]+(1.00)cpd00006[c]<=>(1.00)cpd00005[c]+(2.00)cpd00067[c]+(1.00)cpd00003[c]		0	1000	1	0
rxn08308	2.7.7.41		(1.00)1,2-ditetradec-7-enoyl-sn-glycerol_3-phosphate+(1.00)CTP<=>(1.00)PPi+(1.00)CDP-1,2-ditetradec-7-enoylglycerol	(1.00)cpd15523[c]+(1.00)cpd00052[c]<=>(1.00)cpd00012[c]+(1.00)cpd15422[c]		-1000	1000	1	0
rxn02733	6.6.1.1	R03877	(1.00)H2O+(1.00)ATP+(1.00)Mg+(1.00)Protoporphyrin<=>(1.00)Mg-protoporphyrin_IX+(1.00)Phosphate+(3.00)H++(1.00)ADP	(1.00)cpd00001[c]+(1.00)cpd00002[c]+(1.00)cpd00254[c]+(1.00)cpd01476[c]<=>(1.00)cpd02216[c]+(1.00)cpd00009[c]+(3.00)cpd00067[c]+(1.00)cpd00008[c]		0	1000	1	0
rxn02945	2.5.1.32	R04218	(1.00)Prephytoene_diphosphate<=>(1.00)PPi+(1.00)15-cis-Phytoene	(1.00)cpd02168[c]<=>(1.00)cpd00012[c]+(1.00)cpd03211[c]		0	1000	0	0
rxn00777	5.3.1.6	R01056	(1.00)ribose-5-phosphate<=>(1.00)D-Ribulose5-phosphate	(1.00)cpd00101[c]<=>(1.00)cpd00171[c]		-1000	1000	1	0
rxn00409	2.7.4.6	R00570	(1.00)CDP+(1.00)ATP<=>(1.00)CTP+(1.00)ADP	(1.00)cpd00096[c]+(1.00)cpd00002[c]<=>(1.00)cpd00052[c]+(1.00)cpd00008[c]		0	1000	1	0
rxn05602	no match		(1.00)H++(1.00)L-Lactate<=>(1.00)H++(1.00)L-Lactate	(1.00)cpd00067[e]+(1.00)cpd00159[e]<=>(1.00)cpd00067[c]+(1.00)cpd00159[c]		-1000	1000	1	0
rxn03536	2.7.1.156	R05221	(1.00)Adenosyl_cobinamide+(1.00)ATP<=>(1.00)Adenosyl_cobinamide phosphate+(1.00)H++(1.00)ADP	(1.00)cpd03918[c]+(1.00)cpd00002[c]<=>(1.00)cpd03919[c]+(1.00)cpd00067[c]+(1.00)cpd00008[c]		0	1000	1	0
rxn01512	2.7.4.6	R02093	(1.00)dTDP+(1.00)ATP<=>(1.00)TTP+(1.00)ADP	(1.00)cpd00297[c]+(1.00)cpd00002[c]<=>(1.00)cpd00357[c]+(1.00)cpd00008[c]		0	1000	1	0
rxn00883	3.1.3.25	R01187	(1.00)Inositol_3-phosphate+(1.00)H2O<=>(1.00)Phosphate+(1.00)H++(1.00)L-Inositol	(1.00)cpd02484[c]+(1.00)cpd00001[c]<=>(1.00)cpd00009[c]+(1.00)cpd00067[c]+(1.00)cpd00121[c]		0	1000	0	0
rxn12846	3.4.11.2		(1.00)H2O+(1.00)Gly-Phe<=>(1.00)L-Phenylalanine+(1.00)Glycine	(1.00)cpd00001[c]+(1.00)cpd15605[c]<=>(1.00)cpd00066[c]+(1.00)cpd00033[c]		-1000	1000	1	0
rxn00248	1.1.1.37	R00342	(1.00)L-Malate+(1.00)NAD<=>(1.00)Oxaloacetate+(1.00)H++(1.00)NADH	(1.00)cpd00130[c]+(1.00)cpd00003[c]<=>(1.00)cpd00032[c]+(1.00)cpd00067[c]+(1.00)cpd00004[c]		-1000	1000	1	0
rxn05161	no match		(1.00)L-Leucine+(1.00)H2O+(1.00)ATP<=>(1.00)Phosphate+(1.00)L-Leucine+(1.00)H++(1.00)ADP	(1.00)cpd00107[e]+(1.00)cpd00001[c]+(1.00)cpd00002[c]<=>(1.00)cpd00009[c]+(1.00)cpd00107[c]+(1.00)cpd00067[c]+(1.00)cpd00008[c]		0	1000	0	0
rxn05239	1.8.4.8	R02021	(1.00)trdrd+(1.00)3-phosphoadenylylsulfate<=>(1.00)trdox+(1.00)Sulfite+(1.00)Adenosine_3-5-bisphosphate	(1.00)cpd11421[c]+(1.00)cpd00044[c]<=>(1.00)cpd11420[c]+(1.00)cpd00081[c]+(1.00)cpd00045[c]		0	1000	0	0
rxn05734	no match		(1.00)Glyoxalate+(1.00)H2O+(1.00)NAD<=>(2.00)H++(1.00)NADH+(1.00)Oxalate	(1.00)cpd00040[c]+(1.00)cpd00001[c]+(1.00)cpd00003[c]<=>(2.00)cpd00067[c]+(1.00)cpd00004[c]+(1.00)cpd00180[c]		-1000	1000	1	0
rxn08547	2.3.1.15		(1.00)Myristoyl-ACP+(1.00)Glycerol-3-phosphate<=>(1.00)1-tetradecanoyl-sn-glycerol_3-phosphate+(1.00)ACP	(1.00)cpd11466[c]+(1.00)cpd00080[c]<=>(1.00)cpd15331[c]+(1.00)cpd11493[c]		0	1000	0	0
rxn01302	1.1.1.3	R01775	(1.00)L-Homoserine+(1.00)NADP<=>(1.00)NADPH+(1.00)L-Aspartate4-semialdehyde+(1.00)H+	(1.00)cpd00227[c]+(1.00)cpd00006[c]<=>(1.00)cpd00005[c]+(1.00)cpd00346[c]+(1.00)cpd00067[c]		-1000	1000	1	0
rxn03406	6.3.1.2		(1.00)NH3+(1.00)Undecaprenyl-diphospho-N-acetylmuramoyl-(N-acetylglucosamine)-L-alanyl-D-glutamyl-L-lysyl-D-alanyl-D-alanine+(1.00)ATP<=>(1.00)Phosphate+(1.00)Undecaprenyl-diphospho-N-acetylmuramoyl-(N-acetylglucosamine)-L-alanyl-D-glutaminyl-L-lysyl-D-alanyl-D-alanine+(1.00)H++(1.00)ADP	(1.00)cpd00013[c]+(1.00)cpd03487[c]+(1.00)cpd00002[c]<=>(1.00)cpd00009[c]+(1.00)cpd03488[c]+(1.00)cpd00067[c]+(1.00)cpd00008[c]		0	1000	0	0
rxn01466	2.5.1.10	R02003	(1.00)Isopentenyldiphosphate+(1.00)Geranyldiphosphate<=>(1.00)PPi+(1.00)Farnesyldiphosphate	(1.00)cpd00113[c]+(1.00)cpd00283[c]<=>(1.00)cpd00012[c]+(1.00)cpd00350[c]		0	1000	0	0
rxn02185	2.2.1.6	R03050	(1.00)TPP+(1.00)ALCTT<=>(1.00)Pyruvate+(1.00)2-Hydroxyethyl-ThPP	(1.00)cpd00056[c]+(1.00)cpd00668[c]<=>(1.00)cpd00020[c]+(1.00)cpd03049[c]		-1000	1000	1	0
rxn00500	1.1.1.28	R00704	(1.00)D-Lactate+(1.00)NAD<=>(1.00)H++(1.00)Pyruvate+(1.00)NADH	(1.00)cpd00221[c]+(1.00)cpd00003[c]<=>(1.00)cpd00067[c]+(1.00)cpd00020[c]+(1.00)cpd00004[c]		-1000	1000	1	0
rxn05422	1.1.1.0		(1.00)NADPH+(1.00)H++(1.00)10-methyl-3-oxo-undecanoyl-ACP<=>(1.00)NADP+(1.00)10-methyl-3-hydroxy-undecanoyl-ACP	(1.00)cpd00005[c]+(1.00)cpd00067[c]+(1.00)cpd11558[c]<=>(1.00)cpd00006[c]+(1.00)cpd11559[c]		-1000	1000	1	0
rxn05358	2.3.1.0		(1.00)2-Methylbutyryl-CoA+(1.00)ACP<=>(1.00)CoA+(1.00)2-methylbutyryl-ACP	(1.00)cpd00760[c]+(1.00)cpd11493[c]<=>(1.00)cpd00010[c]+(1.00)cpd11495[c]		-1000	1000	1	0
rxn05448	1.3.1.0		(1.00)10-methyl-trans-undec-2-enoyl-ACP+(1.00)H++(1.00)NADH<=>(1.00)NAD+(1.00)10-methyl-undecanoyl-ACP	(1.00)cpd11560[c]+(1.00)cpd00067[c]+(1.00)cpd00004[c]<=>(1.00)cpd00003[c]+(1.00)cpd11561[c]		0	1000	0	0
rxn00048	2.5.1.9	R00066	(2.00)6-7-Dimethyl-8-1-D-ribityllumazine<=>(1.00)4-1-D-Ribitylamino-5-aminouracil+(1.00)Riboflavin	(2.00)cpd02656[c]<=>(1.00)cpd02882[c]+(1.00)cpd00220[c]		0	1000	0	0
rxn07584	2.7.7.63	R07770	(1.00)Lipoate+(1.00)H++(1.00)ATP<=>(1.00)Lipoyl-AMP+(1.00)PPi	(1.00)cpd00541[c]+(1.00)cpd00067[c]+(1.00)cpd00002[c]<=>(1.00)cpd14955[c]+(1.00)cpd00012[c]		0	1000	1	0
rxn01106	5.4.2.1	R01518	(1.00)2-Phospho-D-glycerate<=>(1.00)3-Phosphoglycerate	(1.00)cpd00482[c]<=>(1.00)cpd00169[c]		-1000	1000	1	0
rxn03164	6.3.2.10	R04617	(1.00)UDP-N-acetylmuramoyl-L-alanyl-D-gamma-glutamyl-meso-2-6-diaminopimelate+(1.00)Ala-Ala+(1.00)ATP<=>(1.00)UDP-N-acetylmuramoyl-L-alanyl-D-glutamyl-6-carboxy-L-lysyl-D-alanyl-_D-alanine+(1.00)Phosphate+(1.00)H++(1.00)ADP	(1.00)cpd02964[c]+(1.00)cpd00731[c]+(1.00)cpd00002[c]<=>(1.00)cpd02968[c]+(1.00)cpd00009[c]+(1.00)cpd00067[c]+(1.00)cpd00008[c]		0	1000	0	0
rxn02213	4.2.1.10	R03084	(1.00)5-Dehydroquinate<=>(1.00)3-Dehydroshikimate+(1.00)H2O	(1.00)cpd00699[c]<=>(1.00)cpd01716[c]+(1.00)cpd00001[c]		0	1000	0	0
rxn08976	no match		(1.00)2-Demethylmenaquinone_8+(1.00)H++(1.00)NADH<=>(1.00)2-Demethylmenaquinol_8+(1.00)NAD	(1.00)cpd15352[c]+(1.00)cpd00067[c]+(1.00)cpd00004[c]<=>(1.00)cpd15353[c]+(1.00)cpd00003[c]		0	1000	0	0
rxn00342	3.5.1.1	R00485	(1.00)L-Asparagine+(1.00)H2O<=>(1.00)NH3+(1.00)L-Aspartate	(1.00)cpd00132[c]+(1.00)cpd00001[c]<=>(1.00)cpd00013[c]+(1.00)cpd00041[c]		0	1000	0	0
rxn08669	no match		(1.00)Glycerophosphoglycerol+(1.00)H2O<=>(1.00)Glycerol+(1.00)Glycerol-3-phosphate	(1.00)cpd02090[c]+(1.00)cpd00001[c]<=>(1.00)cpd00100[c]+(1.00)cpd00080[c]		0	1000	0	0
rxn00784	4.1.2.4	R01066	(1.00)deoxyribose-5-phosphate<=>(1.00)Acetaldehyde+(1.00)Glyceraldehyde3-phosphate	(1.00)cpd00510[c]<=>(1.00)cpd00071[c]+(1.00)cpd00102[c]		-1000	1000	1	0
rxn04154	1.14.13.81	R06267	(1.00)NADPH+(1.00)O2+(1.00)13(1)-Oxo-Mg-protoporphyrin_IX 13-monomethyl ester<=>(2.00)H2O+(1.00)Divinylprotochlorophyllide+(1.00)NADP	(1.00)cpd00005[c]+(1.00)cpd00007[c]+(1.00)cpd08630[c]<=>(2.00)cpd00001[c]+(1.00)cpd08631[c]+(1.00)cpd00006[c]		-1000	1000	1	0
rxn02200	2.5.1.15	R03066	(1.00)ABEE+(1.00)6-hydroxymethyl_dihydropterin<=>(1.00)Dihydropteroate+(1.00)H2O	(1.00)cpd00443[c]+(1.00)cpd00954[c]<=>(1.00)cpd00683[c]+(1.00)cpd00001[c]		-1000	1000	1	0
rxn00361	2.7.1.25	R00509	(1.00)APS+(1.00)ATP<=>(1.00)ADP+(1.00)3-phosphoadenylylsulfate	(1.00)cpd00193[c]+(1.00)cpd00002[c]<=>(1.00)cpd00008[c]+(1.00)cpd00044[c]		0	1000	1	0
rxn00082	1.14.13.39		(1.00)NADPH+(1.00)O2+(2.00)N-(omega)-Hydroxyarginine<=>(3.00)H++(1.00)NADP+(2.00)Citrulline+(2.00)NO	(1.00)cpd00005[c]+(1.00)cpd00007[c]+(2.00)cpd03527[c]<=>(3.00)cpd00067[c]+(1.00)cpd00006[c]+(2.00)cpd00274[c]+(2.00)cpd00418[c]		-1000	1000	1	0
rxn02804	2.3.1.16|2.3.1.155	R03991	(1.00)Myristoyl-CoA+(1.00)Acetyl-CoA<=>(1.00)3-Oxopalmitoyl-CoA+(1.00)CoA	(1.00)cpd01695[c]+(1.00)cpd00022[c]<=>(1.00)cpd03114[c]+(1.00)cpd00010[c]		-1000	1000	1	0
rxn02789	4.2.1.33	R03968	(1.00)2-Isopropylmalate<=>(1.00)H2O+(1.00)2-Isopropylmaleate	(1.00)cpd01646[c]<=>(1.00)cpd00001[c]+(1.00)cpd01710[c]		-1000	1000	1	0
rxn05383	2.3.1.0		(1.00)Isovaleryl-CoA+(1.00)ACP<=>(1.00)isovaleryl-ACP+(1.00)CoA	(1.00)cpd01882[c]+(1.00)cpd11493[c]<=>(1.00)cpd11520[c]+(1.00)cpd00010[c]		-1000	1000	1	0
rxn01258	5.4.4.2	R01717	(1.00)Chorismate<=>(1.00)Isochorismate	(1.00)cpd00216[c]<=>(1.00)cpd00658[c]		-1000	1000	1	0
rxn00293	2.7.7.23	R00416	(1.00)N-Acetyl-D-glucosamine1-phosphate+(1.00)UTP<=>(1.00)UDP-N-acetylglucosamine+(1.00)PPi	(1.00)cpd02611[c]+(1.00)cpd00062[c]<=>(1.00)cpd00037[c]+(1.00)cpd00012[c]		-1000	1000	1	0
rxn00830	5.3.3.2	R01123	(1.00)Isopentenyldiphosphate<=>(1.00)DMAPP	(1.00)cpd00113[c]<=>(1.00)cpd00202[c]		-1000	1000	1	0
rxn05542	3.A.1.5|3.|.1.5		(1.00)H2O+(1.00)ATP+(1.00)L-alanylglycine<=>(1.00)Phosphate+(1.00)H++(1.00)ADP+(1.00)L-alanylglycine	(1.00)cpd00001[c]+(1.00)cpd00002[c]+(1.00)cpd11585[e]<=>(1.00)cpd00009[c]+(1.00)cpd00067[c]+(1.00)cpd00008[c]+(1.00)cpd11585[c]		0	1000	0	0
rxn08180	2.8.1.6		(1.00)S+(1.00)Dethiobiotin+(1.00)S-Adenosyl-L-methionine<=>(1.00)H++(1.00)BIOT+(1.00)L-Methionine+(1.00)5-Deoxyadenosine	(1.00)cpd00074[c]+(1.00)cpd01311[c]+(1.00)cpd00017[c]<=>(1.00)cpd00067[c]+(1.00)cpd00104[c]+(1.00)cpd00060[c]+(1.00)cpd03091[c]		0	1000	0	0
rxn05229	no match		(1.00)AIR+(1.00)H2CO3+(1.00)ATP<=>(1.00)Phosphate+(1.00)H++(1.00)5-Phosphoribosyl-4-carboxy-5-aminoimidazole+(1.00)ADP	(1.00)cpd02140[c]+(1.00)cpd00242[c]+(1.00)cpd00002[c]<=>(1.00)cpd00009[c]+(1.00)cpd00067[c]+(1.00)cpd02893[c]+(1.00)cpd00008[c]		0	1000	0	0
rxn01331	1.2.1.72	R01825	(1.00)H2O+(1.00)NAD+(1.00)D-Erythrose4-phosphate<=>(2.00)H++(1.00)NADH+(1.00)4-Phosphoerythronate	(1.00)cpd00001[c]+(1.00)cpd00003[c]+(1.00)cpd00236[c]<=>(2.00)cpd00067[c]+(1.00)cpd00004[c]+(1.00)cpd02147[c]		0	1000	0	0
rxn05397	1.1.1.0		(1.00)NADPH+(1.00)H++(1.00)11-methyl-3-oxo-dodecanoyl-ACP<=>(1.00)11-methyl-3-hydroxy-dodecanoyl-ACP+(1.00)NADP	(1.00)cpd00005[c]+(1.00)cpd00067[c]+(1.00)cpd11533[c]<=>(1.00)cpd11534[c]+(1.00)cpd00006[c]		-1000	1000	1	0
rxn12637	no match		(1.00)gly-asp-L+(1.00)H2O<=>(1.00)L-Aspartate+(1.00)Glycine	(1.00)cpd11589[c]+(1.00)cpd00001[c]<=>(1.00)cpd00041[c]+(1.00)cpd00033[c]		-1000	1000	1	0
rxn03538	2.7.8.26	R05223	(1.00)alpha-Ribazole+(1.00)Adenosylcobinamide-GDP<=>(1.00)GMP+(1.00)Calomide	(1.00)cpd03423[c]+(1.00)cpd03920[c]<=>(1.00)cpd00126[c]+(1.00)cpd00166[c]		-1000	1000	1	0
rxn05740	no match		(1.00)Phosphate+(1.00)H++(1.00)Glycogen<=>(1.00)Glucose-1-phosphate	(1.00)cpd00009[c]+(1.00)cpd00067[c]+(1.00)cpd00155[c]<=>(1.00)cpd00089[c]		-1000	1000	1	0
rxn04308	2.5.1.31	R06447	(7.00)Isopentenyldiphosphate+(1.00)trans,trans,cis-Geranylgeranyl_diphosphate<=>(1.00)Bactoprenyl_diphosphate+(7.00)PPi	(7.00)cpd00113[c]+(1.00)cpd08211[c]<=>(1.00)cpd02229[c]+(7.00)cpd00012[c]		0	1000	0	0
rxn10042	no match		(1.00)Phosphate+(4.00)H++(1.00)ADP<=>(3.00)H++(1.00)H2O+(1.00)ATP	(1.00)cpd00009[c]+(4.00)cpd00067[e]+(1.00)cpd00008[c]<=>(3.00)cpd00067[c]+(1.00)cpd00001[c]+(1.00)cpd00002[c]		0	0	1	0
rxn00800	4.3.2.2	R01083	(1.00)Adenylosuccinate<=>(1.00)Fumarate+(1.00)AMP	(1.00)cpd02375[c]<=>(1.00)cpd00106[c]+(1.00)cpd00018[c]		-1000	1000	1	0
rxn07586	no match	R07772	(1.00)Cobalt-precorrin_5+(1.00)H2O<=>(1.00)H++(1.00)Acetaldehyde+(1.00)Cobalt-precorrin_5B	(1.00)cpd08371[c]+(1.00)cpd00001[c]<=>(1.00)cpd00067[c]+(1.00)cpd00071[c]+(1.00)cpd14960[c]		-1000	1000	1	0
rxn01343	2.7.1.11	R01843	(1.00)Sedoheptulose7-phosphate+(1.00)ATP<=>(1.00)ADP+(1.00)Sedoheptulose_1,7-bisphosphate	(1.00)cpd00238[c]+(1.00)cpd00002[c]<=>(1.00)cpd00008[c]+(1.00)cpd00349[c]		0	1000	1	0
rxn01537	3.5.99.2	R02133	(1.00)Thiamin+(1.00)H2O<=>(1.00)Toxopyrimidine+(1.00)4-Methyl-5-2-hydroxyethyl-thiazole+(1.00)H+	(1.00)cpd00305[c]+(1.00)cpd00001[c]<=>(1.00)cpd00939[c]+(1.00)cpd02636[c]+(1.00)cpd00067[c]		-1000	1000	1	0
rxn01520	2.1.1.45	R02101	(1.00)dUMP+(1.00)5-10-Methylenetetrahydrofolate<=>(1.00)dTMP+(1.00)Dihydrofolate	(1.00)cpd00299[c]+(1.00)cpd00125[c]<=>(1.00)cpd00298[c]+(1.00)cpd00330[c]		0	1000	0	0
rxn05415	4.2.1.0		(1.00)6-methyl-3-hydroxy-heptanoyl-ACP<=>(1.00)6-methyl-trans-hept-2-enoyl-ACP+(1.00)H2O	(1.00)cpd11551[c]<=>(1.00)cpd11552[c]+(1.00)cpd00001[c]		-1000	1000	1	0
rxn10194	3.6.3.40		(1.00)Prenol-45n_teichoic acid+(1.00)Peptidoglycan_polymer (n-1 subunits)<=>(1.00)glycerol_teichoic acid (n=45), linked, unsubstituted+(1.00)Undecaprenylphosphate	(1.00)cpd15661[c]+(1.00)cpd15666[c]<=>(1.00)cpd15667[c]+(1.00)cpd00286[c]		-1000	1000	1	0
rxn03062	1.1.1.85	R04426	(1.00)3-Isopropylmalate+(1.00)NAD<=>(1.00)H++(1.00)NADH+(1.00)2-isopropyl-3-oxosuccinate	(1.00)cpd02693[c]+(1.00)cpd00003[c]<=>(1.00)cpd00067[c]+(1.00)cpd00004[c]+(1.00)cpd02605[c]		-1000	1000	1	0
rxn00189	3.5.1.2|6.3.5.4|6.3.5.5	R00256	(1.00)L-Glutamine+(1.00)H2O<=>(1.00)NH3+(1.00)L-Glutamate	(1.00)cpd00053[c]+(1.00)cpd00001[c]<=>(1.00)cpd00013[c]+(1.00)cpd00023[c]		0	1000	0	0
rxn08783	no match		(1.00)D-Lactate+(1.00)Ubiquinone-8<=>(1.00)Pyruvate+(1.00)Ubiquinol-8	(1.00)cpd00221[c]+(1.00)cpd15560[c]<=>(1.00)cpd00020[c]+(1.00)cpd15561[c]		0	0	0	0
rxn00322	4.1.1.18	R00462	(1.00)L-Lysine+(1.00)H+<=>(1.00)Cadaverine+(1.00)CO2	(1.00)cpd00039[c]+(1.00)cpd00067[c]<=>(1.00)cpd01155[c]+(1.00)cpd00011[c]		0	1000	0	0
rxn05441	1.3.1.0		(1.00)H++(1.00)9-methyl-trans-dec-2-enoyl-ACP+(1.00)NADH<=>(1.00)9-methyl-decanoyl-ACP+(1.00)NAD	(1.00)cpd00067[c]+(1.00)cpd11531[c]+(1.00)cpd00004[c]<=>(1.00)cpd11532[c]+(1.00)cpd00003[c]		0	1000	0	0
rxn00463	3.6.1.19	R00662	(1.00)H2O+(1.00)UTP<=>(1.00)UMP+(1.00)PPi	(1.00)cpd00001[c]+(1.00)cpd00062[c]<=>(1.00)cpd00091[c]+(1.00)cpd00012[c]		0	1000	0	0
rxn05054	6.3.1.10	R07302	(1.00)1-Aminopropan-2-ol+(1.00)Adenosylcobyric_acid+(1.00)ATP<=>(1.00)Phosphate+(1.00)H++(1.00)Adenosyl_cobinamide+(1.00)ADP	(1.00)cpd02039[c]+(1.00)cpd03917[c]+(1.00)cpd00002[c]<=>(1.00)cpd00009[c]+(1.00)cpd00067[c]+(1.00)cpd03918[c]+(1.00)cpd00008[c]		0	1000	1	0
rxn05426	1.1.1.0		(1.00)NADPH+(1.00)H++(1.00)12-methyl-3-oxo-tridecanoyl-ACP<=>(1.00)12-methyl-3-hydroxy-tridecanoyl-ACP+(1.00)NADP	(1.00)cpd00005[c]+(1.00)cpd00067[c]+(1.00)cpd11562[c]<=>(1.00)cpd11563[c]+(1.00)cpd00006[c]		-1000	1000	1	0
rxn00974	4.2.1.3	R01325	(1.00)Citrate<=>(1.00)cis-Aconitate+(1.00)H2O	(1.00)cpd00137[c]<=>(1.00)cpd00331[c]+(1.00)cpd00001[c]		-1000	1000	1	0
rxn08297	2.7.1.107		(1.00)1,2-Diacyl-sn-glycerol_dihexadecanoyl+(1.00)ATP<=>(1.00)1,2-dihexadecanoyl-sn-glycerol_3-phosphate+(1.00)ADP	(1.00)cpd15309[c]+(1.00)cpd00002[c]<=>(1.00)cpd15524[c]+(1.00)cpd00008[c]		0	1000	1	0
rxn00506	1.2.1.3|1.2.1.5	R00710	(1.00)H2O+(1.00)Acetaldehyde+(1.00)NAD<=>(1.00)Acetate+(2.00)H++(1.00)NADH	(1.00)cpd00001[c]+(1.00)cpd00071[c]+(1.00)cpd00003[c]<=>(1.00)cpd00029[c]+(2.00)cpd00067[c]+(1.00)cpd00004[c]		0	1000	0	0
rxn04384	6.3.1.10	R06529	(1.00)(R)-1-Aminopropan-2-yl_phosphate+(1.00)Adenosylcobyric_acid+(1.00)ATP<=>(1.00)Phosphate+(1.00)Adenosyl_cobinamide phosphate+(2.00)H++(1.00)ADP	(1.00)cpd02547[c]+(1.00)cpd03917[c]+(1.00)cpd00002[c]<=>(1.00)cpd00009[c]+(1.00)cpd03919[c]+(2.00)cpd00067[c]+(1.00)cpd00008[c]		0	1000	1	0
rxn01388	4.2.1.3	R01900	(1.00)Isocitrate<=>(1.00)cis-Aconitate+(1.00)H2O	(1.00)cpd00260[c]<=>(1.00)cpd00331[c]+(1.00)cpd00001[c]		-1000	1000	1	0
rxn00902	2.3.3.13	R01213	(1.00)H++(1.00)2-Isopropylmalate+(1.00)CoA<=>(1.00)3-Methyl-2-oxobutanoate+(1.00)H2O+(1.00)Acetyl-CoA	(1.00)cpd00067[c]+(1.00)cpd01646[c]+(1.00)cpd00010[c]<=>(1.00)cpd00123[c]+(1.00)cpd00001[c]+(1.00)cpd00022[c]		-1000	0	0	0
rxn05421	2.3.1.0		(1.00)8-methyl-nonanoyl-ACP+(1.00)H++(1.00)Malonyl-acyl-carrierprotein-<=>(1.00)ACP+(1.00)10-methyl-3-oxo-undecanoyl-ACP+(1.00)CO2	(1.00)cpd11557[c]+(1.00)cpd00067[c]+(1.00)cpd11492[c]<=>(1.00)cpd11493[c]+(1.00)cpd11558[c]+(1.00)cpd00011[c]		0	1000	0	0
rxn00503	1.5.1.12	R00707	(2.00)H2O+(1.00)1-Pyrroline-5-carboxylate+(1.00)NAD<=>(1.00)H++(1.00)NADH+(1.00)L-Glutamate	(2.00)cpd00001[c]+(1.00)cpd02431[c]+(1.00)cpd00003[c]<=>(1.00)cpd00067[c]+(1.00)cpd00004[c]+(1.00)cpd00023[c]		-1000	1000	1	0
rxn03909	2.2.1.7	R05636	(1.00)H++(1.00)Pyruvate+(1.00)Glyceraldehyde3-phosphate<=>(1.00)1-deoxy-D-xylulose5-phosphate+(1.00)CO2	(1.00)cpd00067[c]+(1.00)cpd00020[c]+(1.00)cpd00102[c]<=>(1.00)cpd08289[c]+(1.00)cpd00011[c]		0	1000	0	0
rxn02985	1.1.1.153|1.1.1.220	R04285	(1.00)6-Lactoyl-5,6,7,8-tetrahydropterin+(1.00)NADP<=>(1.00)NADPH+(1.00)6-Pyruvoyltetrahydropterin+(1.00)H+	(1.00)cpd02608[c]+(1.00)cpd00006[c]<=>(1.00)cpd00005[c]+(1.00)cpd02315[c]+(1.00)cpd00067[c]		-1000	1000	1	0
rxn00119	2.7.4.22	R00158	(1.00)UMP+(1.00)ATP<=>(1.00)UDP+(1.00)ADP	(1.00)cpd00091[c]+(1.00)cpd00002[c]<=>(1.00)cpd00014[c]+(1.00)cpd00008[c]		0	1000	1	0
rxn01791	6.3.2.1	R02473	(1.00)beta-Alanine+(1.00)Pantoate+(1.00)ATP<=>(1.00)PPi+(1.00)PAN+(1.00)AMP	(1.00)cpd00085[c]+(1.00)cpd00408[c]+(1.00)cpd00002[c]<=>(1.00)cpd00012[c]+(1.00)cpd00644[c]+(1.00)cpd00018[c]		0	1000	0	0
rxn10214	2.3.1.51		(1.00)fa11coa+(1.00)1-isoheptadecanoyl-sn-glycerol_3-phosphate<=>(1.00)1,2-diisoheptadecanoyl-sn-glycerol_3-phosphate+(1.00)CoA	(1.00)cpd11432[c]+(1.00)cpd15671[c]<=>(1.00)cpd15677[c]+(1.00)cpd00010[c]		0	1000	0	0
rxn04070	2.6.99.2	R05838	(1.00)1-deoxy-D-xylulose5-phosphate+(1.00)3-Amino-2-oxopropyl_phosphate<=>(1.00)Phosphate+(2.00)H++(1.00)Pyridoxine_phosphate+(2.00)H2O	(1.00)cpd08289[c]+(1.00)cpd08449[c]<=>(1.00)cpd00009[c]+(2.00)cpd00067[c]+(1.00)cpd00478[c]+(2.00)cpd00001[c]		0	1000	0	0
rxn05328	1.3.1.9	R04969	(1.00)hexadecanoyl-acp+(1.00)NAD<=>(1.00)H++(1.00)NADH+(1.00)(2E)-Hexadecenoyl-[acp]	(1.00)cpd11476[c]+(1.00)cpd00003[c]<=>(1.00)cpd00067[c]+(1.00)cpd00004[c]+(1.00)cpd11477[c]		-1000	0	0	0
rxn09685	no match		(1.00)H++(1.00)Deoxyuridine<=>(1.00)H++(1.00)Deoxyuridine	(1.00)cpd00067[e]+(1.00)cpd00412[e]<=>(1.00)cpd00067[c]+(1.00)cpd00412[c]		-1000	1000	1	0
rxn03446	4.2.3.1	R05086	(1.00)H2O+(1.00)4-(Phosphonooxy)-threonine<=>(1.00)Phosphate+(1.00)H++(1.00)4-Hydroxy-L-threonine	(1.00)cpd00001[c]+(1.00)cpd03607[c]<=>(1.00)cpd00009[c]+(1.00)cpd00067[c]+(1.00)cpd03608[c]		0	1000	0	0
rxn05332	2.3.1.85|2.3.1.86|4.2.1.61	R04544	(1.00)R-3-hydroxypalmitoyl-acyl-carrierprotein-<=>(1.00)H2O+(1.00)(2E)-Hexadecenoyl-[acp]	(1.00)cpd11481[c]<=>(1.00)cpd00001[c]+(1.00)cpd11477[c]		-1000	1000	1	0
rxn02314	2.7.1.11	R03236	(1.00)D-Tagatose_6-phosphate+(1.00)ATP<=>(1.00)D-Tagatose_1,6-biphosphate+(1.00)ADP	(1.00)cpd00805[c]+(1.00)cpd00002[c]<=>(1.00)cpd02371[c]+(1.00)cpd00008[c]		0	1000	1	0
rxn01519	3.6.1.19	R02100	(1.00)dUTP+(1.00)H2O<=>(1.00)dUMP+(1.00)PPi	(1.00)cpd00358[c]+(1.00)cpd00001[c]<=>(1.00)cpd00299[c]+(1.00)cpd00012[c]		0	1000	0	0
rxn00179	2.7.2.11	R00239	(1.00)H++(1.00)ATP+(1.00)L-Glutamate<=>(1.00)L-Glutamyl_5-phosphate+(1.00)ADP	(1.00)cpd00067[c]+(1.00)cpd00002[c]+(1.00)cpd00023[c]<=>(1.00)cpd02097[c]+(1.00)cpd00008[c]		0	1000	1	0
rxn02853	1.2.1.3	R04065	(1.00)H2O+(1.00)Imidazole_acetaldehyde+(1.00)NAD<=>(2.00)H++(1.00)4-Imidazoleacetate+(1.00)NADH	(1.00)cpd00001[c]+(1.00)cpd03052[c]+(1.00)cpd00003[c]<=>(2.00)cpd00067[c]+(1.00)cpd01831[c]+(1.00)cpd00004[c]		0	1000	0	0
rxn00999	1.13.11.27	R01372	(1.00)Phenylpyruvate+(1.00)O2<=>(1.00)2-Hydroxyphenylacetate+(1.00)CO2	(1.00)cpd00143[c]+(1.00)cpd00007[c]<=>(1.00)cpd03480[c]+(1.00)cpd00011[c]		0	1000	0	0
rxn03004	2.1.2.2	R04325	(1.00)GAR+(1.00)10-Formyltetrahydrofolate<=>(1.00)Tetrahydrofolate+(1.00)N-Formyl-GAR+(1.00)H+	(1.00)cpd02394[c]+(1.00)cpd00201[c]<=>(1.00)cpd00087[c]+(1.00)cpd02678[c]+(1.00)cpd00067[c]		-1000	1000	1	0
rxn00029	4.2.1.24	R00036	(2.00)5-Aminolevulinate<=>(1.00)H++(1.00)Porphobilinogen+(2.00)H2O	(2.00)cpd00338[c]<=>(1.00)cpd00067[c]+(1.00)cpd00689[c]+(2.00)cpd00001[c]		0	1000	0	0
rxn01324	1.1.1.153	R01813	(1.00)Tetrahydrobiopterin+(1.00)NADP<=>(1.00)NADPH+(1.00)6-Lactoyl-5,6,7,8-tetrahydropterin+(1.00)H+	(1.00)cpd00233[c]+(1.00)cpd00006[c]<=>(1.00)cpd00005[c]+(1.00)cpd02608[c]+(1.00)cpd00067[c]		-1000	1000	1	0
rxn01465	3.5.2.3	R01993	(1.00)S-Dihydroorotate+(1.00)H2O<=>(1.00)N-Carbamoyl-L-aspartate+(1.00)H+	(1.00)cpd00282[c]+(1.00)cpd00001[c]<=>(1.00)cpd00343[c]+(1.00)cpd00067[c]		-1000	1000	1	0
rxn05364	1.1.1.0		(1.00)NADPH+(1.00)H++(1.00)6-methyl-3-oxo-octanoyl-ACP<=>(1.00)6-methyl-3-hydroxy-octanoyl-ACP+(1.00)NADP	(1.00)cpd00005[c]+(1.00)cpd00067[c]+(1.00)cpd11500[c]<=>(1.00)cpd11501[c]+(1.00)cpd00006[c]		-1000	1000	1	0
rxn05372	1.1.1.0		(1.00)NADPH+(1.00)H++(1.00)10-methyl-3-oxo-dodecanoyl-ACP<=>(1.00)10-methyl-3-hydroxy-dodecanoyl-ACP+(1.00)NADP	(1.00)cpd00005[c]+(1.00)cpd00067[c]+(1.00)cpd11508[c]<=>(1.00)cpd11509[c]+(1.00)cpd00006[c]		-1000	1000	1	0
rxn00863	1.1.1.23	R01163	(1.00)L-Histidinal+(1.00)H2O+(1.00)NAD<=>(1.00)L-Histidine+(2.00)H++(1.00)NADH	(1.00)cpd01324[c]+(1.00)cpd00001[c]+(1.00)cpd00003[c]<=>(1.00)cpd00119[c]+(2.00)cpd00067[c]+(1.00)cpd00004[c]		0	1000	0	0
rxn01299	3.2.2.1	R01770	(1.00)H2O+(1.00)Inosine<=>(1.00)HYXN+(1.00)D-Ribose	(1.00)cpd00001[c]+(1.00)cpd00246[c]<=>(1.00)cpd00226[c]+(1.00)cpd00105[c]		-1000	1000	1	0
rxn11544	no match		(2.00)L-Glutamine+(1.00)Hydrogenobyrinate+(1.00)H2O+(2.00)ATP<=>(1.00)Hydrogenobyrinate_diamide+(1.00)PPi+(2.00)ADP+(2.00)L-Glutamate	(2.00)cpd00053[c]+(1.00)cpd03832[c]+(1.00)cpd00001[c]+(2.00)cpd00002[c]<=>(1.00)cpd03913[c]+(1.00)cpd00012[c]+(2.00)cpd00008[c]+(2.00)cpd00023[c]		0	1000	1	0
rxn00242	3.1.7.2	R00336	(1.00)Guanosine_3,5-bis(diphosphate)+(1.00)H2O<=>(1.00)PPi+(1.00)GDP	(1.00)cpd00905[c]+(1.00)cpd00001[c]<=>(1.00)cpd00012[c]+(1.00)cpd00031[c]		0	1000	0	0
rxn01975	1.1.1.49	R02736	(1.00)NADP+(1.00)beta-D-Glucose_6-phosphate<=>(1.00)NADPH+(1.00)H++(1.00)6-phospho-D-glucono-1-5-lactone	(1.00)cpd00006[c]+(1.00)cpd00863[c]<=>(1.00)cpd00005[c]+(1.00)cpd00067[c]+(1.00)cpd00911[c]		-1000	1000	1	0
rxn02925	2.6.1.18	R04187	(1.00)L-Alanine+(1.00)3-Oxo-2-methylpropanoate<=>(1.00)L-3-Amino-isobutyrate+(1.00)Pyruvate	(1.00)cpd00035[c]+(1.00)cpd00287[c]<=>(1.00)cpd02096[c]+(1.00)cpd00020[c]		-1000	1000	1	0
rxn00459	4.2.1.11	R00658	(1.00)2-Phospho-D-glycerate<=>(1.00)H2O+(1.00)Phosphoenolpyruvate	(1.00)cpd00482[c]<=>(1.00)cpd00001[c]+(1.00)cpd00061[c]		-1000	1000	1	0
rxn00405	4.1.1.19	R00566	(1.00)H++(1.00)L-Arginine<=>(1.00)Agmatine+(1.00)CO2	(1.00)cpd00067[c]+(1.00)cpd00051[c]<=>(1.00)cpd00152[c]+(1.00)cpd00011[c]		0	1000	0	0
rxn02277	6.3.3.3	R03182	(1.00)7-8-Diaminononanoate+(1.00)ATP+(1.00)CO2<=>(1.00)Phosphate+(3.00)H++(1.00)ADP+(1.00)Dethiobiotin	(1.00)cpd00764[c]+(1.00)cpd00002[c]+(1.00)cpd00011[c]<=>(1.00)cpd00009[c]+(3.00)cpd00067[c]+(1.00)cpd00008[c]+(1.00)cpd01311[c]		0	1000	0	0
rxn03150	3.1.3.73	R04594	(1.00)H2O+(1.00)alpha-Ribazole_5-phosphate<=>(1.00)Phosphate+(1.00)alpha-Ribazole+(1.00)H+	(1.00)cpd00001[c]+(1.00)cpd02904[c]<=>(1.00)cpd00009[c]+(1.00)cpd03423[c]+(1.00)cpd00067[c]		0	1000	0	0
rxn09687	no match		(1.00)H++(1.00)Deoxyinosine<=>(1.00)H++(1.00)Deoxyinosine	(1.00)cpd00067[e]+(1.00)cpd03279[e]<=>(1.00)cpd00067[c]+(1.00)cpd03279[c]		-1000	1000	1	0
rxn04413	2.7.1.156	R06558	(1.00)Adenosyl_cobinamide+(1.00)GTP<=>(1.00)Adenosyl_cobinamide phosphate+(1.00)H++(1.00)GDP	(1.00)cpd03918[c]+(1.00)cpd00038[c]<=>(1.00)cpd03919[c]+(1.00)cpd00067[c]+(1.00)cpd00031[c]		-1000	1000	1	0
rxn10225	2.7.7.41		(1.00)CTP+(1.00)1,2-diisohexadecanoyl-sn-glycerol_3-phosphate<=>(1.00)PPi+(1.00)CDP-1,2-diisohexadecanoylglycerol	(1.00)cpd00052[c]+(1.00)cpd15682[c]<=>(1.00)cpd00012[c]+(1.00)cpd15688[c]		-1000	1000	1	0
rxn10259	2.7.8.5		(1.00)Glycerol-3-phosphate+(1.00)CDP-1,2-diisoheptadecanoylglycerol<=>(1.00)Diisoheptadecanoylphosphatidylglycerophosphate+(1.00)CMP	(1.00)cpd00080[c]+(1.00)cpd15683[c]<=>(1.00)cpd15716[c]+(1.00)cpd00046[c]		-1000	1000	1	0
rxn03491	2.1.1.132	R05149	(1.00)Precorrin_6B+(2.00)S-Adenosyl-L-methionine<=>(2.00)H++(2.00)S-Adenosyl-homocysteine+(1.00)CO2+(1.00)Precorrin_8	(1.00)cpd03760[c]+(2.00)cpd00017[c]<=>(2.00)cpd00067[c]+(2.00)cpd00019[c]+(1.00)cpd00011[c]+(1.00)cpd03835[c]		-1000	1000	1	0
rxn05031	2.5.1.32	R07270	(1.00)Prephytoene_diphosphate<=>(1.00)Phytoene+(1.00)PPi	(1.00)cpd02168[c]<=>(1.00)cpd03205[c]+(1.00)cpd00012[c]		0	1000	0	0
rxn00018	4.1.1.39	R00024	(1.00)D-Ribulose_1,5-bisphosphate+(1.00)H2O+(1.00)CO2<=>(2.00)3-Phosphoglycerate+(2.00)H+	(1.00)cpd00871[c]+(1.00)cpd00001[c]+(1.00)cpd00011[c]<=>(2.00)cpd00169[c]+(2.00)cpd00067[c]		-1000	1000	1	0
rxn10217	2.3.1.51		(1.00)fa3coa+(1.00)1-isopentadecanoyl-sn-glycerol_3-phosphate<=>(1.00)CoA+(1.00)1,2-diisopentadecanoyl-sn-glycerol_3-phosphate	(1.00)cpd11437[c]+(1.00)cpd15674[c]<=>(1.00)cpd00010[c]+(1.00)cpd15680[c]		0	1000	0	0
rxn09449	6.2.1.3		(1.00)H++(1.00)ATP+(1.00)ocdca+(1.00)CoA<=>(1.00)PPi+(1.00)strcoa+(1.00)AMP	(1.00)cpd00067[c]+(1.00)cpd00002[c]+(1.00)cpd01080[c]+(1.00)cpd00010[c]<=>(1.00)cpd00012[c]+(1.00)cpd00327[c]+(1.00)cpd00018[c]		0	1000	0	0
rxn05735	no match		(1.00)Aminoacetaldehyde+(1.00)H2O+(1.00)NAD<=>(2.00)H++(1.00)Glycine+(1.00)NADH	(1.00)cpd04122[c]+(1.00)cpd00001[c]+(1.00)cpd00003[c]<=>(2.00)cpd00067[c]+(1.00)cpd00033[c]+(1.00)cpd00004[c]		0	1000	0	0
rxn00691	3.5.1.10	R00944	(1.00)H2O+(1.00)10-Formyltetrahydrofolate<=>(1.00)Tetrahydrofolate+(1.00)H++(1.00)Formate	(1.00)cpd00001[c]+(1.00)cpd00201[c]<=>(1.00)cpd00087[c]+(1.00)cpd00067[c]+(1.00)cpd00047[c]		0	1000	0	0
rxn00929	1.5.1.2	R01248	(1.00)L-Proline+(1.00)NAD<=>(1.00)H++(1.00)NADH+(1.00)1-Pyrroline-5-carboxylate	(1.00)cpd00129[c]+(1.00)cpd00003[c]<=>(1.00)cpd00067[c]+(1.00)cpd00004[c]+(1.00)cpd02431[c]		-1000	1000	1	0
rxn12638	no match		(1.00)gly-pro-L+(1.00)H2O<=>(1.00)H++(1.00)L-Proline+(1.00)Glycine	(1.00)cpd11588[c]+(1.00)cpd00001[c]<=>(1.00)cpd00067[c]+(1.00)cpd00129[c]+(1.00)cpd00033[c]		0	1000	0	0
rxn05316	no match		(1.00)H++(1.00)Inosine<=>(1.00)H++(1.00)Inosine	(1.00)cpd00067[e]+(1.00)cpd00246[e]<=>(1.00)cpd00067[c]+(1.00)cpd00246[c]		-1000	1000	1	0
rxn05329	4.2.1.58	R04428	(1.00)(R)-3-Hydroxybutanoyl-[acyl-carrier_protein]<=>(1.00)But-2-enoyl-[acyl-carrier_protein]+(1.00)H2O	(1.00)cpd11478[c]<=>(1.00)cpd11465[c]+(1.00)cpd00001[c]		-1000	1000	1	0
rxn00533	6.4.1.2	R00742	(1.00)H2CO3+(1.00)ATP+(1.00)Acetyl-CoA<=>(1.00)Phosphate+(1.00)H++(1.00)ADP+(1.00)Malonyl-CoA	(1.00)cpd00242[c]+(1.00)cpd00002[c]+(1.00)cpd00022[c]<=>(1.00)cpd00009[c]+(1.00)cpd00067[c]+(1.00)cpd00008[c]+(1.00)cpd00070[c]		0	1000	1	0
rxn08311	2.7.7.41		(1.00)1,2-dioctadecanoyl-sn-glycerol_3-phosphate+(1.00)CTP<=>(1.00)CDP-1,2-dioctadecanoylglycerol+(1.00)PPi	(1.00)cpd15526[c]+(1.00)cpd00052[c]<=>(1.00)cpd15421[c]+(1.00)cpd00012[c]		-1000	1000	1	0
rxn10168	no match		(1.00)K++(1.00)H2O+(1.00)ATP<=>(1.00)Phosphate+(1.00)H++(1.00)K++(1.00)ADP	(1.00)cpd00205[e]+(1.00)cpd00001[c]+(1.00)cpd00002[c]<=>(1.00)cpd00009[c]+(1.00)cpd00067[c]+(1.00)cpd00205[c]+(1.00)cpd00008[c]		0	1000	0	0
rxn05419	4.2.1.0		(1.00)8-methyl-3-hydroxy-nonanoyl-ACP<=>(1.00)8-methyl-trans-non-2-enoyl-ACP+(1.00)H2O	(1.00)cpd11555[c]<=>(1.00)cpd11556[c]+(1.00)cpd00001[c]		-1000	1000	1	0
rxn10263	2.7.8.5		(1.00)CDP-1,2-dianteisopentadecanoylglycerol+(1.00)Glycerol-3-phosphate<=>(1.00)Dianteisopentadecanoylphosphatidylglycerophosphate+(1.00)CMP	(1.00)cpd15687[c]+(1.00)cpd00080[c]<=>(1.00)cpd15720[c]+(1.00)cpd00046[c]		-1000	1000	1	0
rxn00423	2.3.1.30	R00586	(1.00)L-Serine+(1.00)Acetyl-CoA<=>(1.00)O-Acetyl-L-serine+(1.00)CoA	(1.00)cpd00054[c]+(1.00)cpd00022[c]<=>(1.00)cpd00722[c]+(1.00)cpd00010[c]		0	1000	0	0
rxn08756	1.17.1.2	R08209	(1.00)H++(1.00)NADH+(1.00)1-Hydroxy-2-methyl-2-butenyl_4-diphosphate<=>(1.00)Isopentenyldiphosphate+(1.00)H2O+(1.00)NAD	(1.00)cpd00067[c]+(1.00)cpd00004[c]+(1.00)cpd08615[c]<=>(1.00)cpd00113[c]+(1.00)cpd00001[c]+(1.00)cpd00003[c]		0	1000	0	0
rxn03975	1.5.1.29	R05706	(1.00)FMNH2+(1.00)NADP<=>(1.00)NADPH+(1.00)FMN+(1.00)H+	(1.00)cpd01270[c]+(1.00)cpd00006[c]<=>(1.00)cpd00005[c]+(1.00)cpd00050[c]+(1.00)cpd00067[c]		-1000	0	0	0
rxn03436	1.1.1.86	R05069	(1.00)2-Aceto-2-hydroxybutanoate<=>(1.00)(R)-3-Hydroxy-3-methyl-2-oxopentanoate	(1.00)cpd00498[c]<=>(1.00)cpd10162[c]		-1000	1000	1	0
rxn12643	no match		(1.00)H2O+(1.00)Ala-Leu<=>(1.00)L-Leucine+(1.00)L-Alanine	(1.00)cpd00001[c]+(1.00)cpd11583[c]<=>(1.00)cpd00107[c]+(1.00)cpd00035[c]		0	1000	0	0
rxn05430	1.1.1.0		(1.00)14-methyl-3-oxo-pentadecanoyl-ACP+(1.00)NADPH+(1.00)H+<=>(1.00)NADP+(1.00)14-methyl-3-hydroxy-pentadecanoyl-ACP	(1.00)cpd11566[c]+(1.00)cpd00005[c]+(1.00)cpd00067[c]<=>(1.00)cpd00006[c]+(1.00)cpd11567[c]		-1000	1000	1	0
rxn01964	4.2.1.20	R02722	(1.00)Indoleglycerol_phosphate+(1.00)L-Serine<=>(1.00)L-Tryptophan+(1.00)H2O+(1.00)Glyceraldehyde3-phosphate	(1.00)cpd02210[c]+(1.00)cpd00054[c]<=>(1.00)cpd00065[c]+(1.00)cpd00001[c]+(1.00)cpd00102[c]		0	1000	0	0
rxn08615	no match		(1.00)ADPglucose<=>(1.00)Glycogen+(1.00)ADP	(1.00)cpd00387[c]<=>(1.00)cpd00155[c]+(1.00)cpd00008[c]		-1000	1000	1	0
rxn10207	2.3.1.15		(1.00)fa1coa+(1.00)Glycerol-3-phosphate<=>(1.00)1-isotetradecanoyl-sn-glycerol_3-phosphate+(1.00)CoA	(1.00)cpd11435[c]+(1.00)cpd00080[c]<=>(1.00)cpd15673[c]+(1.00)cpd00010[c]		0	1000	0	0
rxn10113	no match		(2.50)H++(0.50)O2+(1.00)Ubiquinol-8<=>(2.50)H++(1.00)Ubiquinone-8+(1.00)H2O	(2.50)cpd00067[c]+(0.50)cpd00007[c]+(1.00)cpd15561[c]<=>(2.50)cpd00067[e]+(1.00)cpd15560[c]+(1.00)cpd00001[c]		0	0	0	0
rxn01101	1.1.1.95	R01513	(1.00)3-Phosphoglycerate+(1.00)NAD<=>(1.00)H++(1.00)NADH+(1.00)3-Phosphonooxypyruvate	(1.00)cpd00169[c]+(1.00)cpd00003[c]<=>(1.00)cpd00067[c]+(1.00)cpd00004[c]+(1.00)cpd02069[c]		-1000	1000	1	0
rxn00559	no match	R01819	(1.00)D-mannose-6-phosphate<=>(1.00)D-fructose-6-phosphate	(1.00)cpd00235[c]<=>(1.00)cpd00072[c]		-1000	1000	1	0
rxn00615	2.7.1.30	R00847	(1.00)Glycerol+(1.00)ATP<=>(1.00)ADP+(1.00)Glycerol-3-phosphate	(1.00)cpd00100[c]+(1.00)cpd00002[c]<=>(1.00)cpd00008[c]+(1.00)cpd00080[c]		0	1000	1	0
rxn03919	3.1.-.-	R05647	(1.00)D-Glycero-D-manno-heptose1-7-bisphosphate+(1.00)H2O<=>(1.00)Phosphate+(1.00)D-Glycero-D-manno-heptose1-phosphate+(1.00)H+	(1.00)cpd08316[c]+(1.00)cpd00001[c]<=>(1.00)cpd00009[c]+(1.00)cpd04920[c]+(1.00)cpd00067[c]		0	1000	0	0
rxn03248	2.3.1.16	R04747	(1.00)Hexanoyl-CoA+(1.00)Acetyl-CoA<=>(1.00)3-Oxooctanoyl-CoA+(1.00)CoA	(1.00)cpd03124[c]+(1.00)cpd00022[c]<=>(1.00)cpd03121[c]+(1.00)cpd00010[c]		-1000	1000	1	0
rxn08307	2.7.7.41		(1.00)CTP+(1.00)1,2-ditetradecanoyl-sn-glycerol_3-phosphate<=>(1.00)PPi+(1.00)CDP-1,2-ditetradecanoylglycerol	(1.00)cpd00052[c]+(1.00)cpd15522[c]<=>(1.00)cpd00012[c]+(1.00)cpd15423[c]		-1000	1000	1	0
rxn00302	3.5.4.16	R00428	(1.00)H2O+(1.00)GTP<=>(1.00)Formamidopyrimidine_nucleoside triphosphate	(1.00)cpd00001[c]+(1.00)cpd00038[c]<=>(1.00)cpd03518[c]		0	1000	0	0
rxn00358	5.4.99.9	R00505	(1.00)UDP-galactose<=>(1.00)UDP-D-galacto-1,4-furanose	(1.00)cpd00043[c]<=>(1.00)cpd02338[c]		-1000	1000	1	0
rxn02264	4.2.1.75	R03165	(1.00)Hydroxymethylbilane<=>(1.00)H2O+(1.00)UroporphyrinogenIII	(1.00)cpd00755[c]<=>(1.00)cpd00001[c]+(1.00)cpd00774[c]		-1000	1000	1	0
rxn03903	2.7.8.13	R05629	(1.00)UDPMurAc(oyl-L-Ala-D-gamma-Glu-L-Lys-D-Ala-D-Ala)+(1.00)Undecaprenylphosphate<=>(1.00)MurAc(oyl-L-Ala-D-gamma-Glu-L-Lys-D-Ala-D-Ala)-diphospho-_undecaprenol+(1.00)UMP	(1.00)cpd02862[c]+(1.00)cpd00286[c]<=>(1.00)cpd02948[c]+(1.00)cpd00091[c]		-1000	1000	1	0
rxn10043	1.9.3.1		(2.00)Cytochrome_c2++(6.00)H++(0.50)O2<=>(4.00)H++(1.00)H2O+(2.00)Cytochrome_c3+	(2.00)cpd00110[c]+(6.00)cpd00067[c]+(0.50)cpd00007[c]<=>(4.00)cpd00067[e]+(1.00)cpd00001[c]+(2.00)cpd00109[c]		-1000	1000	1	0
rxn03537	2.7.7.62	R05222	(1.00)Adenosyl_cobinamide phosphate+(1.00)H++(1.00)GTP<=>(1.00)Adenosylcobinamide-GDP+(1.00)PPi	(1.00)cpd03919[c]+(1.00)cpd00067[c]+(1.00)cpd00038[c]<=>(1.00)cpd03920[c]+(1.00)cpd00012[c]		-1000	1000	1	0
rxn05315	no match		(1.00)H++(1.00)Zn2++(1.00)K+<=>(1.00)H++(1.00)Zn2++(1.00)K+	(1.00)cpd00067[e]+(1.00)cpd00034[c]+(1.00)cpd00205[e]<=>(1.00)cpd00067[c]+(1.00)cpd00034[e]+(1.00)cpd00205[c]		-1000	1000	1	0
rxn00985	2.7.2.1	R01353	(1.00)H++(1.00)ATP+(1.00)Propionate<=>(1.00)ADP+(1.00)Propionyl_phosphate	(1.00)cpd00067[c]+(1.00)cpd00002[c]+(1.00)cpd00141[c]<=>(1.00)cpd00008[c]+(1.00)cpd01844[c]		0	1000	1	0
rxn05427	4.2.1.0		(1.00)12-methyl-3-hydroxy-tridecanoyl-ACP<=>(1.00)H2O+(1.00)12-methyl-trans-tridec-2-enoyl-ACP	(1.00)cpd11563[c]<=>(1.00)cpd00001[c]+(1.00)cpd11564[c]		-1000	1000	1	0
rxn05341	1.1.1.100|2.3.1.85|2.3.1.86	R04536	(1.00)(R)-3-Hydroxyoctanoyl-[acyl-carrier_protein]+(1.00)NADP<=>(1.00)NADPH+(1.00)H++(1.00)3-oxooctanoyl-acp	(1.00)cpd11483[c]+(1.00)cpd00006[c]<=>(1.00)cpd00005[c]+(1.00)cpd00067[c]+(1.00)cpd11490[c]		-1000	1000	1	0
rxn05145	3.A.1.7|3.|.1.7		(1.00)Phosphate+(1.00)H2O+(1.00)ATP<=>(2.00)Phosphate+(1.00)H++(1.00)ADP	(1.00)cpd00009[e]+(1.00)cpd00001[c]+(1.00)cpd00002[c]<=>(2.00)cpd00009[c]+(1.00)cpd00067[c]+(1.00)cpd00008[c]		0	1000	1	0
rxn12510	2.7.1.33	R03018	(1.00)ATP+(1.00)PAN<=>(1.00)ADP+(1.00)4-phosphopantothenate	(1.00)cpd00002[c]+(1.00)cpd00644[c]<=>(1.00)cpd00008[c]+(1.00)cpd02201[c]		0	1000	1	0
rxn02201	2.5.1.15	R03067	(1.00)ABEE+(1.00)7,8-Dihydropterin_pyrophosphate<=>(1.00)Dihydropteroate+(1.00)PPi	(1.00)cpd00443[c]+(1.00)cpd02920[c]<=>(1.00)cpd00683[c]+(1.00)cpd00012[c]		0	1000	0	0
rxn10123	no match		(3.00)H++(1.00)NADH+(1.00)Menaquinone_8<=>(2.00)H++(1.00)Menaquinol_8+(1.00)NAD	(3.00)cpd00067[c]+(1.00)cpd00004[c]+(1.00)cpd15500[c]<=>(2.00)cpd00067[e]+(1.00)cpd15499[c]+(1.00)cpd00003[c]		0	1000	0	0
rxn11545	no match		(0.50)O2+(1.00)Precorrin_3A<=>(1.00)Precorrin_3B	(0.50)cpd00007[c]+(1.00)cpd03420[c]<=>(1.00)cpd03833[c]		-1000	1000	1	0
rxn05447	1.3.1.0		(1.00)8-methyl-trans-non-2-enoyl-ACP+(1.00)H++(1.00)NADH<=>(1.00)8-methyl-nonanoyl-ACP+(1.00)NAD	(1.00)cpd11556[c]+(1.00)cpd00067[c]+(1.00)cpd00004[c]<=>(1.00)cpd11557[c]+(1.00)cpd00003[c]		0	1000	0	0
rxn02988	2.5.1.72	R04292	(1.00)Phosphate+(1.00)H++(1.00)Quinolinate+(2.00)H2O<=>(1.00)Iminoaspartate+(1.00)Glycerone-phosphate	(1.00)cpd00009[c]+(1.00)cpd00067[c]+(1.00)cpd02333[c]+(2.00)cpd00001[c]<=>(1.00)cpd03470[c]+(1.00)cpd00095[c]		-1000	0	0	0
rxn05392	2.3.1.0		(1.00)7-methyl-octanoyl-ACP+(1.00)H++(1.00)Malonyl-acyl-carrierprotein-<=>(1.00)9-methyl-3-oxo-decanoyl-ACP+(1.00)ACP+(1.00)CO2	(1.00)cpd11528[c]+(1.00)cpd00067[c]+(1.00)cpd11492[c]<=>(1.00)cpd11529[c]+(1.00)cpd11493[c]+(1.00)cpd00011[c]		0	1000	0	0
rxn05176	no match		(1.00)H2O+(1.00)H2S2O3+(1.00)ATP<=>(1.00)Phosphate+(1.00)H++(1.00)ADP+(1.00)H2S2O3	(1.00)cpd00001[c]+(1.00)cpd00268[e]+(1.00)cpd00002[c]<=>(1.00)cpd00009[c]+(1.00)cpd00067[c]+(1.00)cpd00008[c]+(1.00)cpd00268[c]		0	1000	0	0
rxn00161	1.1.1.40	R00216	(1.00)L-Malate+(1.00)NADP<=>(1.00)NADPH+(1.00)Pyruvate+(1.00)CO2	(1.00)cpd00130[c]+(1.00)cpd00006[c]<=>(1.00)cpd00005[c]+(1.00)cpd00020[c]+(1.00)cpd00011[c]		0	1000	0	0
rxn02046	3.1.3.3	R02853	(1.00)H2O+(1.00)D-O-Phosphoserine<=>(1.00)Phosphate+(1.00)H++(1.00)D-Serine	(1.00)cpd00001[c]+(1.00)cpd01665[c]<=>(1.00)cpd00009[c]+(1.00)cpd00067[c]+(1.00)cpd00550[c]		0	1000	0	0
rxn05460	2.3.1.0		(1.00)H++(1.00)hexadecanoyl-acp+(1.00)Malonyl-acyl-carrierprotein-<=>(1.00)ACP+(1.00)CO2+(1.00)3-Oxooctodecanoyl-ACP	(1.00)cpd00067[c]+(1.00)cpd11476[c]+(1.00)cpd11492[c]<=>(1.00)cpd11493[c]+(1.00)cpd00011[c]+(1.00)cpd11570[c]		0	1000	0	0
rxn00808	2.7.1.6	R01092	(1.00)Galactose+(1.00)ATP<=>(1.00)D-Galactose_1-phosphate+(1.00)ADP	(1.00)cpd00108[c]+(1.00)cpd00002[c]<=>(1.00)cpd00348[c]+(1.00)cpd00008[c]		0	1000	1	0
rxn08352	1.17.1.2	R08210	(1.00)H++(1.00)NADH+(1.00)1-Hydroxy-2-methyl-2-butenyl_4-diphosphate<=>(1.00)H2O+(1.00)DMAPP+(1.00)NAD	(1.00)cpd00067[c]+(1.00)cpd00004[c]+(1.00)cpd08615[c]<=>(1.00)cpd00001[c]+(1.00)cpd00202[c]+(1.00)cpd00003[c]		0	1000	0	0
rxn10199	no match		(1.00)Peptidoglycan_polymer (n-1 subunits)+(1.00)Undecaprenyl-diphospho-N-acetylmuramoyl-N-acetylglucosamine-L-ala-D-glu-meso-2-6-diaminopimeloyl-D-ala-D-ala<=>(1.00)Bactoprenyl_diphosphate+(1.00)Peptidoglycan_polymer (n subunits)	(1.00)cpd15666[c]+(1.00)cpd03495[c]<=>(1.00)cpd02229[c]+(1.00)cpd15665[c]		-1000	1000	1	0
rxn05209	no match		(1.00)H++(1.00)Na+<=>(1.00)H++(1.00)Na+	(1.00)cpd00067[c]+(1.00)cpd00971[e]<=>(1.00)cpd00067[e]+(1.00)cpd00971[c]		-1000	1000	1	0
rxn05402	4.2.1.0		(1.00)13-methyl-3-hydroxy-tetra-decanoyl-ACP<=>(1.00)13-methyl-trans-tetra-dec-2-enoyl-ACP+(1.00)H2O	(1.00)cpd11538[c]<=>(1.00)cpd11539[c]+(1.00)cpd00001[c]		-1000	1000	1	0
rxn02380	5.3.1.9	R03321	(1.00)beta-D-Glucose_6-phosphate<=>(1.00)D-fructose-6-phosphate	(1.00)cpd00863[c]<=>(1.00)cpd00072[c]		-1000	1000	1	0
rxn08306	2.7.7.41		(1.00)CTP+(1.00)1,2-didodecanoyl-sn-glycerol_3-phosphate<=>(1.00)PPi+(1.00)CDP-1,2-didodecanoylglycerol	(1.00)cpd00052[c]+(1.00)cpd15521[c]<=>(1.00)cpd00012[c]+(1.00)cpd15417[c]		-1000	1000	1	0
rxn00474	4.2.1.20	R00674	(1.00)indol+(1.00)L-Serine<=>(1.00)L-Tryptophan+(1.00)H2O	(1.00)cpd00359[c]+(1.00)cpd00054[c]<=>(1.00)cpd00065[c]+(1.00)cpd00001[c]		0	1000	0	0
rxn00709	2.7.1.48	R00964	(1.00)Uridine+(1.00)ATP<=>(1.00)UMP+(1.00)ADP	(1.00)cpd00249[c]+(1.00)cpd00002[c]<=>(1.00)cpd00091[c]+(1.00)cpd00008[c]		0	1000	1	0
rxn05535	3.A.1.5|3.|.1.5		(1.00)Gly-Met+(1.00)H2O+(1.00)ATP<=>(1.00)Phosphate+(1.00)Gly-Met+(1.00)H++(1.00)ADP	(1.00)cpd11591[e]+(1.00)cpd00001[c]+(1.00)cpd00002[c]<=>(1.00)cpd00009[c]+(1.00)cpd11591[c]+(1.00)cpd00067[c]+(1.00)cpd00008[c]		0	1000	0	0
rxn02159	1.1.1.23	R03012	(1.00)L-Histidinol+(1.00)NAD<=>(1.00)H++(1.00)L-Histidinal+(1.00)NADH	(1.00)cpd00641[c]+(1.00)cpd00003[c]<=>(1.00)cpd00067[c]+(1.00)cpd01324[c]+(1.00)cpd00004[c]		-1000	1000	1	0
rxn05360	1.1.1.0		(1.00)NADPH+(1.00)4-methyl-3-oxo-hexanoyl-ACP+(1.00)H+<=>(1.00)4-methyl-3-hydroxy-hexanoyl-ACP+(1.00)NADP	(1.00)cpd00005[c]+(1.00)cpd11496[c]+(1.00)cpd00067[c]<=>(1.00)cpd11497[c]+(1.00)cpd00006[c]		-1000	1000	1	0
rxn00148	2.7.1.40	R00200	(1.00)Pyruvate+(1.00)ATP<=>(1.00)Phosphoenolpyruvate+(1.00)ADP	(1.00)cpd00020[c]+(1.00)cpd00002[c]<=>(1.00)cpd00061[c]+(1.00)cpd00008[c]		0	1000	1	0
rxn00214	5.1.3.2	R00291	(1.00)UDP-glucose<=>(1.00)UDP-galactose	(1.00)cpd00026[c]<=>(1.00)cpd00043[c]		-1000	1000	1	0
rxn00874	2.3.1.9|2.3.1.16	R01177	(1.00)Butyryl-CoA+(1.00)Acetyl-CoA<=>(1.00)3-Oxohexanoyl-CoA+(1.00)CoA	(1.00)cpd00120[c]+(1.00)cpd00022[c]<=>(1.00)cpd03123[c]+(1.00)cpd00010[c]		-1000	1000	1	0
rxn02937	6.3.3.1	R04208	(1.00)5-Phosphoribosylformylglycinamidine+(1.00)ATP<=>(1.00)Phosphate+(1.00)AIR+(1.00)H++(1.00)ADP	(1.00)cpd02826[c]+(1.00)cpd00002[c]<=>(1.00)cpd00009[c]+(1.00)cpd02140[c]+(1.00)cpd00067[c]+(1.00)cpd00008[c]		0	1000	1	0
rxn09114	2.7.8.5		(1.00)CDP-1,2-dioctadec-11-enoylglycerol+(1.00)Glycerol-3-phosphate<=>(1.00)Phosphatidylglycerophosphate_dioctadec-11-enoyl+(1.00)CMP	(1.00)cpd15420[c]+(1.00)cpd00080[c]<=>(1.00)cpd15548[c]+(1.00)cpd00046[c]		-1000	1000	1	0
rxn00056	1.16.3.1	R00078	(4.00)Fe2++(4.00)H++(1.00)O2<=>(2.00)H2O+(4.00)fe3	(4.00)cpd10515[c]+(4.00)cpd00067[c]+(1.00)cpd00007[c]<=>(2.00)cpd00001[c]+(4.00)cpd10516[c]		-1000	1000	1	0
rxn00640	2.7.7.22	R00883	(1.00)D-Mannose1-phosphate+(1.00)GDP<=>(1.00)Phosphate+(1.00)H++(1.00)GDP-mannose	(1.00)cpd00485[c]+(1.00)cpd00031[c]<=>(1.00)cpd00009[c]+(1.00)cpd00067[c]+(1.00)cpd00083[c]		-1000	1000	1	0
rxn06600	2.1.2.10	R04125	(1.00)Tetrahydrofolate+(1.00)S-Aminomethyldihydrolipoylprotein<=>(1.00)NH3+(1.00)5-10-Methylenetetrahydrofolate+(1.00)Dihydrolipolprotein	(1.00)cpd00087[c]+(1.00)cpd11830[c]<=>(1.00)cpd00013[c]+(1.00)cpd00125[c]+(1.00)cpd12225[c]		0	1000	0	0
rxn05507	no match		(1.00)Arsenite<=>(1.00)Arsenite	(1.00)cpd04098[c]<=>(1.00)cpd04098[e]		-1000	1000	1	0
rxn00727	4.1.3.27	R00986	(1.00)L-Glutamine+(1.00)Chorismate<=>(1.00)H++(1.00)Pyruvate+(1.00)Anthranilate+(1.00)L-Glutamate	(1.00)cpd00053[c]+(1.00)cpd00216[c]<=>(1.00)cpd00067[c]+(1.00)cpd00020[c]+(1.00)cpd00093[c]+(1.00)cpd00023[c]		0	1000	0	0
rxn03891	2.5.1.30	R05612	(1.00)Isopentenyldiphosphate+(1.00)all-trans-Hexaprenyl_diphosphate<=>(1.00)all-trans-Heptaprenyl_diphosphate+(1.00)PPi	(1.00)cpd00113[c]+(1.00)cpd00906[c]<=>(1.00)cpd02590[c]+(1.00)cpd00012[c]		0	1000	0	0
rxn03435	1.1.1.86	R05068	(1.00)NADP+(1.00)2,3-Dihydroxy-3-methylvalerate<=>(1.00)NADPH+(1.00)H++(1.00)(R)-3-Hydroxy-3-methyl-2-oxopentanoate	(1.00)cpd00006[c]+(1.00)cpd02535[c]<=>(1.00)cpd00005[c]+(1.00)cpd00067[c]+(1.00)cpd10162[c]		-1000	1000	1	0
rxn00649	2.5.1.47|2.5.1.65	R00897	(1.00)O-Acetyl-L-serine+(1.00)H2S<=>(1.00)Acetate+(1.00)H++(1.00)L-Cysteine	(1.00)cpd00722[c]+(1.00)cpd00239[c]<=>(1.00)cpd00029[c]+(1.00)cpd00067[c]+(1.00)cpd00084[c]		0	1000	0	0
rxn10806	no match		(2.00)H++(0.50)O2+(1.00)Menaquinol_8<=>(2.00)H++(1.00)H2O+(1.00)Menaquinone_8	(2.00)cpd00067[c]+(0.50)cpd00007[c]+(1.00)cpd15499[c]<=>(2.00)cpd00067[e]+(1.00)cpd00001[c]+(1.00)cpd15500[c]		0	1000	0	0
rxn05413	2.3.1.0		(1.00)4-methyl-pentanoyl-ACP+(1.00)H++(1.00)Malonyl-acyl-carrierprotein-<=>(1.00)ACP+(1.00)CO2+(1.00)6-methyl-3-oxo-heptanoyl-ACP	(1.00)cpd11549[c]+(1.00)cpd00067[c]+(1.00)cpd11492[c]<=>(1.00)cpd11493[c]+(1.00)cpd00011[c]+(1.00)cpd11550[c]		0	1000	0	0
rxn04385	4.1.1.81	R06530	(1.00)H++(1.00)L-Threonine_phosphate<=>(1.00)(R)-1-Aminopropan-2-yl_phosphate+(1.00)CO2	(1.00)cpd00067[c]+(1.00)cpd08928[c]<=>(1.00)cpd02547[c]+(1.00)cpd00011[c]		0	1000	0	0
rxn05348	2.3.1.41	R04963	(1.00)H++(1.00)Decanoyl-ACP+(1.00)Malonyl-acyl-carrierprotein-<=>(1.00)ACP+(1.00)3-oxododecanoyl-acp+(1.00)CO2	(1.00)cpd00067[c]+(1.00)cpd11474[c]+(1.00)cpd11492[c]<=>(1.00)cpd11493[c]+(1.00)cpd11489[c]+(1.00)cpd00011[c]		0	1000	0	0
rxn01673	2.7.4.6	R02326	(1.00)dCDP+(1.00)ATP<=>(1.00)ADP+(1.00)dCTP	(1.00)cpd00533[c]+(1.00)cpd00002[c]<=>(1.00)cpd00008[c]+(1.00)cpd00356[c]		0	1000	1	0
rxn00085	1.4.1.13	R00114	(1.00)NADP+(2.00)L-Glutamate<=>(1.00)NADPH+(1.00)L-Glutamine+(1.00)H++(1.00)2-Oxoglutarate	(1.00)cpd00006[c]+(2.00)cpd00023[c]<=>(1.00)cpd00005[c]+(1.00)cpd00053[c]+(1.00)cpd00067[c]+(1.00)cpd00024[c]		-1000	1000	1	0
rxn12845	3.4.11.2		(1.00)Gly-Leu+(1.00)H2O<=>(1.00)L-Leucine+(1.00)Glycine	(1.00)cpd15604[c]+(1.00)cpd00001[c]<=>(1.00)cpd00107[c]+(1.00)cpd00033[c]		-1000	1000	1	0
rxn12851	3.A.1.5		(1.00)Gly-Tyr+(1.00)H2O+(1.00)ATP<=>(1.00)Gly-Tyr+(1.00)Phosphate+(1.00)H++(1.00)ADP	(1.00)cpd15606[e]+(1.00)cpd00001[c]+(1.00)cpd00002[c]<=>(1.00)cpd15606[c]+(1.00)cpd00009[c]+(1.00)cpd00067[c]+(1.00)cpd00008[c]		0	1000	0	0
rxn11702	2.2.1.9	R08165	(1.00)H++(1.00)Isochorismate+(1.00)2-Oxoglutarate<=>(1.00)2-Succinyl-5-enolpyruvyl-6-hydroxy-3-cyclohexene-1-carboxylate+(1.00)CO2	(1.00)cpd00067[c]+(1.00)cpd00658[c]+(1.00)cpd00024[c]<=>(1.00)cpd16335[c]+(1.00)cpd00011[c]		0	1000	0	0
rxn05438	1.3.1.0		(1.00)14-methyl-trans-hexa-dec-2-enoyl-ACP+(1.00)H++(1.00)NADH<=>(1.00)14-methyl-hexa-decanoyl-ACP+(1.00)NAD	(1.00)cpd11518[c]+(1.00)cpd00067[c]+(1.00)cpd00004[c]<=>(1.00)cpd11519[c]+(1.00)cpd00003[c]		0	1000	0	0
rxn05340	1.1.1.100|2.3.1.85|2.3.1.86	R04964	(1.00)D-3-Hydroxydodecanoyl-[acp]+(1.00)NADP<=>(1.00)NADPH+(1.00)H++(1.00)3-oxododecanoyl-acp	(1.00)cpd11480[c]+(1.00)cpd00006[c]<=>(1.00)cpd00005[c]+(1.00)cpd00067[c]+(1.00)cpd11489[c]		-1000	1000	1	0
rxn08085	2.3.1.51		(1.00)1-tetradec-7-enoyl-sn-glycerol_3-phosphate+(1.00)Tetradecenoyl-ACP<=>(1.00)1,2-ditetradec-7-enoyl-sn-glycerol_3-phosphate+(1.00)ACP	(1.00)cpd15330[c]+(1.00)cpd15294[c]<=>(1.00)cpd15523[c]+(1.00)cpd11493[c]		0	1000	0	0
rxn01300	2.7.1.39	R01771	(1.00)L-Homoserine+(1.00)ATP<=>(1.00)O-Phospho-L-homoserine+(1.00)ADP	(1.00)cpd00227[c]+(1.00)cpd00002[c]<=>(1.00)cpd00809[c]+(1.00)cpd00008[c]		0	1000	1	0
rxn05153	no match		(1.00)H2O+(1.00)Sulfate+(1.00)ATP<=>(1.00)Phosphate+(1.00)H++(1.00)ADP+(1.00)Sulfate	(1.00)cpd00001[c]+(1.00)cpd00048[e]+(1.00)cpd00002[c]<=>(1.00)cpd00009[c]+(1.00)cpd00067[c]+(1.00)cpd00008[c]+(1.00)cpd00048[c]		0	1000	0	0
rxn00175	6.2.1.1	R00235	(1.00)Acetate+(1.00)H++(1.00)ATP+(1.00)CoA<=>(1.00)PPi+(1.00)AMP+(1.00)Acetyl-CoA	(1.00)cpd00029[c]+(1.00)cpd00067[c]+(1.00)cpd00002[c]+(1.00)cpd00010[c]<=>(1.00)cpd00012[c]+(1.00)cpd00018[c]+(1.00)cpd00022[c]		0	1000	1	0
rxn09109	2.7.8.5		(1.00)CDP-1,2-ditetradecanoylglycerol+(1.00)Glycerol-3-phosphate<=>(1.00)Phosphatidylglycerophosphate_ditetradecanoyl+(1.00)CMP	(1.00)cpd15423[c]+(1.00)cpd00080[c]<=>(1.00)cpd15543[c]+(1.00)cpd00046[c]		-1000	1000	1	0
rxn00832	2.1.2.3|3.5.4.10	R01127	(1.00)H2O+(1.00)IMP<=>(1.00)FAICAR	(1.00)cpd00001[c]+(1.00)cpd00114[c]<=>(1.00)cpd02884[c]		-1000	1000	1	0
rxn00251	4.1.1.31	R00345	(1.00)Phosphate+(1.00)Oxaloacetate+(2.00)H+<=>(1.00)H2O+(1.00)Phosphoenolpyruvate+(1.00)CO2	(1.00)cpd00009[c]+(1.00)cpd00032[c]+(2.00)cpd00067[c]<=>(1.00)cpd00001[c]+(1.00)cpd00061[c]+(1.00)cpd00011[c]		-1000	1000	1	0
rxn00295	5.1.3.7	R00418	(1.00)UDP-N-acetylglucosamine<=>(1.00)UDP-N-acetyl-D-galactosamine	(1.00)cpd00037[c]<=>(1.00)cpd00175[c]		-1000	1000	1	0
rxn10258	2.7.1.107		(1.00)1,2-Diisohexadecanoyl-sn-glycerol+(1.00)ATP<=>(1.00)ADP+(1.00)1,2-diisohexadecanoyl-sn-glycerol_3-phosphate	(1.00)cpd15706[c]+(1.00)cpd00002[c]<=>(1.00)cpd00008[c]+(1.00)cpd15682[c]		0	1000	1	0
rxn05346	2.3.1.41	R04952	(1.00)H++(1.00)Malonyl-acyl-carrierprotein-+(1.00)Butyryl-ACP<=>(1.00)3-Oxohexanoyl-[acp]+(1.00)ACP+(1.00)CO2	(1.00)cpd00067[c]+(1.00)cpd11492[c]+(1.00)cpd11464[c]<=>(1.00)cpd11486[c]+(1.00)cpd11493[c]+(1.00)cpd00011[c]		0	1000	0	0
rxn10208	2.3.1.15		(1.00)fa3coa+(1.00)Glycerol-3-phosphate<=>(1.00)1-isopentadecanoyl-sn-glycerol_3-phosphate+(1.00)CoA	(1.00)cpd11437[c]+(1.00)cpd00080[c]<=>(1.00)cpd15674[c]+(1.00)cpd00010[c]		0	1000	0	0
rxn10264	2.7.8.5		(1.00)Glycerol-3-phosphate+(1.00)CDP-1,2-diisohexadecanoylglycerol<=>(1.00)Diisohexadecanoylphosphatidylglycerophosphate+(1.00)CMP	(1.00)cpd00080[c]+(1.00)cpd15688[c]<=>(1.00)cpd15721[c]+(1.00)cpd00046[c]		-1000	1000	1	0
rxn05445	1.3.1.0		(1.00)H++(1.00)NADH+(1.00)4-methyl-trans-pent-2-enoyl-ACP<=>(1.00)4-methyl-pentanoyl-ACP+(1.00)NAD	(1.00)cpd00067[c]+(1.00)cpd00004[c]+(1.00)cpd11548[c]<=>(1.00)cpd11549[c]+(1.00)cpd00003[c]		0	1000	0	0
rxn05289	1.8.1.9	R02016	(1.00)NADPH+(1.00)trdox+(1.00)H+<=>(1.00)trdrd+(1.00)NADP	(1.00)cpd00005[c]+(1.00)cpd11420[c]+(1.00)cpd00067[c]<=>(1.00)cpd11421[c]+(1.00)cpd00006[c]		-1000	1000	1	0
rxn00022	3.2.1.20	R00028	(1.00)Maltose+(1.00)H2O<=>(2.00)D-Glucose	(1.00)cpd00179[c]+(1.00)cpd00001[c]<=>(2.00)cpd00027[c]		0	1000	0	0
rxn02000	5.1.3.13	R06514	(1.00)dTDP-4-oxo-6-deoxy-D-glucose<=>(1.00)dTDP-4-oxo-L-rhamnose	(1.00)cpd00521[c]<=>(1.00)cpd00522[c]		-1000	1000	1	0
rxn00558	5.3.1.9	R02740	(1.00)D-glucose-6-phosphate<=>(1.00)D-fructose-6-phosphate	(1.00)cpd00079[c]<=>(1.00)cpd00072[c]		-1000	1000	1	0
rxn00715	2.7.1.48	R00970	(1.00)ITP+(1.00)Uridine<=>(1.00)UMP+(1.00)IDP	(1.00)cpd00068[c]+(1.00)cpd00249[c]<=>(1.00)cpd00091[c]+(1.00)cpd00090[c]		-1000	1000	1	0
rxn01406	2.5.1.16	R01920	(1.00)S-Adenosylmethioninamine+(1.00)Putrescine<=>(1.00)H++(1.00)MTA+(1.00)Spermidine	(1.00)cpd00837[c]+(1.00)cpd00118[c]<=>(1.00)cpd00067[c]+(1.00)cpd00147[c]+(1.00)cpd00264[c]		0	1000	0	0
rxn01977	5.3.1.9	R02739	(1.00)D-glucose-6-phosphate<=>(1.00)beta-D-Glucose_6-phosphate	(1.00)cpd00079[c]<=>(1.00)cpd00863[c]		-1000	1000	1	0
rxn05317	no match		(1.00)H++(1.00)Deoxyadenosine<=>(1.00)H++(1.00)Deoxyadenosine	(1.00)cpd00067[e]+(1.00)cpd00438[e]<=>(1.00)cpd00067[c]+(1.00)cpd00438[c]		-1000	1000	1	0
rxn05335	2.3.1.85|2.3.1.86|4.2.1.61	R04568	(1.00)HMA<=>(1.00)H2O+(1.00)(2E)-Tetradecenoyl-[acp]	(1.00)cpd11484[c]<=>(1.00)cpd00001[c]+(1.00)cpd11467[c]		-1000	1000	1	0
rxn06979	6.3.1.-	R05815	(2.00)L-Glutamine+(2.00)H2O+(2.00)ATP+(1.00)Cobyrinate<=>(2.00)Phosphate+(1.00)Cob(II)yrinate_diamide+(2.00)H++(2.00)ADP+(2.00)L-Glutamate	(2.00)cpd00053[c]+(2.00)cpd00001[c]+(2.00)cpd00002[c]+(1.00)cpd03421[c]<=>(2.00)cpd00009[c]+(1.00)cpd03914[c]+(2.00)cpd00067[c]+(2.00)cpd00008[c]+(2.00)cpd00023[c]		0	1000	1	0
rxn10122	no match		(4.50)H++(1.00)Ubiquinone-8+(1.00)NADH<=>(3.50)H++(1.00)Ubiquinol-8+(1.00)NAD	(4.50)cpd00067[c]+(1.00)cpd15560[c]+(1.00)cpd00004[c]<=>(3.50)cpd00067[e]+(1.00)cpd15561[c]+(1.00)cpd00003[c]		0	0	1	0
rxn12642	no match		(1.00)Ala-His+(1.00)H2O<=>(1.00)L-Histidine+(1.00)L-Alanine	(1.00)cpd11584[c]+(1.00)cpd00001[c]<=>(1.00)cpd00119[c]+(1.00)cpd00035[c]		-1000	1000	1	0
rxn02187	1.1.1.86	R05071	(1.00)ALCTT<=>(1.00)2-Oxo-3-hydroxyisovalerate	(1.00)cpd00668[c]<=>(1.00)cpd02569[c]		-1000	1000	1	0
rxn00368	2.7.1.48	R00516	(1.00)Cytidine+(1.00)UTP<=>(1.00)UDP+(1.00)CMP	(1.00)cpd00367[c]+(1.00)cpd00062[c]<=>(1.00)cpd00014[c]+(1.00)cpd00046[c]		-1000	1000	1	0
rxn09448	6.2.1.3		(1.00)octadecenoate+(1.00)H++(1.00)ATP+(1.00)CoA<=>(1.00)Octadecenoyl-CoA+(1.00)PPi+(1.00)AMP	(1.00)cpd15269[c]+(1.00)cpd00067[c]+(1.00)cpd00002[c]+(1.00)cpd00010[c]<=>(1.00)cpd15274[c]+(1.00)cpd00012[c]+(1.00)cpd00018[c]		0	1000	0	0
rxn00187	6.3.1.2	R00253	(1.00)NH3+(1.00)ATP+(1.00)L-Glutamate<=>(1.00)Phosphate+(1.00)L-Glutamine+(1.00)H++(1.00)ADP	(1.00)cpd00013[c]+(1.00)cpd00002[c]+(1.00)cpd00023[c]<=>(1.00)cpd00009[c]+(1.00)cpd00053[c]+(1.00)cpd00067[c]+(1.00)cpd00008[c]		0	1000	0	0
rxn05198	no match		(1.00)H++(1.00)Cytidine<=>(1.00)H++(1.00)Cytidine	(1.00)cpd00067[e]+(1.00)cpd00367[e]<=>(1.00)cpd00067[c]+(1.00)cpd00367[c]		-1000	1000	1	0
rxn02875	3.5.1.28		(1.00)H2O+(1.00)N-Acetylmuramoyl-Ala<=>(1.00)N-Acetyl-D-muramoate+(1.00)L-Alanine	(1.00)cpd00001[c]+(1.00)cpd01923[c]<=>(1.00)cpd03485[c]+(1.00)cpd00035[c]		-1000	1000	1	0
rxn01219	2.7.4.14	R01665	(1.00)dCMP+(1.00)ATP<=>(1.00)dCDP+(1.00)ADP	(1.00)cpd00206[c]+(1.00)cpd00002[c]<=>(1.00)cpd00533[c]+(1.00)cpd00008[c]		0	1000	1	0
rxn01851	1.2.1.19|1.2.1.3	R02549	(1.00)4-Aminobutanal+(1.00)H2O+(1.00)NAD<=>(2.00)H++(1.00)GABA+(1.00)NADH	(1.00)cpd00434[c]+(1.00)cpd00001[c]+(1.00)cpd00003[c]<=>(2.00)cpd00067[c]+(1.00)cpd00281[c]+(1.00)cpd00004[c]		0	1000	0	0
rxn03421	3.5.4.16|6.-.-.-	R05048	(1.00)2,5-Diaminopyrimidine_nucleoside triphosphate<=>(1.00)2,5-Diamino-6-(5-triphosphoryl-3,4-trihydroxy-2-oxopentyl)-_amino-4-oxopyrimidine	(1.00)cpd03519[c]<=>(1.00)cpd03666[c]		-1000	1000	1	0
rxn00881	3.1.3.25	R01185	(1.00)Inositol_1-phosphate+(1.00)H2O<=>(1.00)Phosphate+(1.00)H++(1.00)L-Inositol	(1.00)cpd00867[c]+(1.00)cpd00001[c]<=>(1.00)cpd00009[c]+(1.00)cpd00067[c]+(1.00)cpd00121[c]		0	1000	0	0
rxn05247	6.2.1.3		(1.00)fa1+(1.00)H++(1.00)ATP+(1.00)CoA<=>(1.00)fa1coa+(1.00)PPi+(1.00)AMP	(1.00)cpd11430[c]+(1.00)cpd00067[c]+(1.00)cpd00002[c]+(1.00)cpd00010[c]<=>(1.00)cpd11435[c]+(1.00)cpd00012[c]+(1.00)cpd00018[c]		0	1000	0	0
rxn00737	4.3.1.19	R00996	(1.00)L-Threonine<=>(1.00)2-Oxobutyrate+(1.00)NH3	(1.00)cpd00161[c]<=>(1.00)cpd00094[c]+(1.00)cpd00013[c]		0	1000	0	0
rxn00986	6.2.1.1	R01354	(1.00)H++(1.00)ATP+(1.00)Propionate<=>(1.00)PPi+(1.00)Propionyladenylate	(1.00)cpd00067[c]+(1.00)cpd00002[c]+(1.00)cpd00141[c]<=>(1.00)cpd00012[c]+(1.00)cpd03560[c]		-1000	0	0	0
rxn03514	2.1.1.133	R05181	(1.00)S-Adenosyl-L-methionine+(1.00)Precorrin_4<=>(1.00)H++(1.00)Precorrin_5+(1.00)S-Adenosyl-homocysteine	(1.00)cpd00017[c]+(1.00)cpd03834[c]<=>(1.00)cpd00067[c]+(1.00)cpd03839[c]+(1.00)cpd00019[c]		-1000	1000	1	0
rxn03540	6.3.5.10	R05225	(4.00)L-Glutamine+(4.00)H2O+(4.00)ATP+(1.00)Adenosyl_cobyrinate diamide<=>(4.00)Phosphate+(4.00)H++(4.00)ADP+(1.00)Adenosylcobyric_acid+(4.00)L-Glutamate	(4.00)cpd00053[c]+(4.00)cpd00001[c]+(4.00)cpd00002[c]+(1.00)cpd03916[c]<=>(4.00)cpd00009[c]+(4.00)cpd00067[c]+(4.00)cpd00008[c]+(1.00)cpd03917[c]+(4.00)cpd00023[c]		0	1000	1	0
rxn01200	2.2.1.1	R01641	(1.00)Sedoheptulose7-phosphate+(1.00)Glyceraldehyde3-phosphate<=>(1.00)D-Xylulose5-phosphate+(1.00)ribose-5-phosphate	(1.00)cpd00238[c]+(1.00)cpd00102[c]<=>(1.00)cpd00198[c]+(1.00)cpd00101[c]		-1000	1000	1	0
rxn07588	2.1.1.132	R07774	(1.00)Cobalt-precorrin_6B+(1.00)S-Adenosyl-L-methionine<=>(1.00)Cobalt-precorrin_7+(1.00)H++(1.00)S-Adenosyl-homocysteine	(1.00)cpd08373[c]+(1.00)cpd00017[c]<=>(1.00)cpd14961[c]+(1.00)cpd00067[c]+(1.00)cpd00019[c]		-1000	1000	1	0
rxn01270	2.6.1.57|2.6.1.78	R01731	(1.00)Oxaloacetate+(1.00)Pretyrosine<=>(1.00)L-Aspartate+(1.00)Prephenate	(1.00)cpd00032[c]+(1.00)cpd00616[c]<=>(1.00)cpd00041[c]+(1.00)cpd00219[c]		-1000	1000	1	0
rxn03841	4.1.3.38	R05553	(1.00)ADC<=>(1.00)ABEE+(1.00)H++(1.00)Pyruvate	(1.00)cpd08210[c]<=>(1.00)cpd00443[c]+(1.00)cpd00067[c]+(1.00)cpd00020[c]		0	1000	0	0
rxn00193	5.1.1.3	R00260	(1.00)L-Glutamate<=>(1.00)D-Glutamate	(1.00)cpd00023[c]<=>(1.00)cpd00186[c]		-1000	1000	1	0
rxn12635	no match		(1.00)Gly-Met+(1.00)H2O<=>(1.00)Glycine+(1.00)L-Methionine	(1.00)cpd11591[c]+(1.00)cpd00001[c]<=>(1.00)cpd00033[c]+(1.00)cpd00060[c]		-1000	1000	1	0
rxn09688	no match		(1.00)H++(1.00)Deoxyguanosine<=>(1.00)H++(1.00)Deoxyguanosine	(1.00)cpd00067[e]+(1.00)cpd00277[e]<=>(1.00)cpd00067[c]+(1.00)cpd00277[c]		-1000	1000	1	0
rxn04160	1.18.-.-	R06282	(2.00)H2O+(1.00)Chlorophyllide+(2.00)ATP<=>(2.00)Phosphate+(5.00)H++(2.00)ADP+(1.00)Protochlorophyllide	(2.00)cpd00001[c]+(1.00)cpd01449[c]+(2.00)cpd00002[c]<=>(2.00)cpd00009[c]+(5.00)cpd00067[c]+(2.00)cpd00008[c]+(1.00)cpd01845[c]		0	1000	1	0
rxn05369	4.2.1.0		(1.00)8-methyl-3-hydroxy-decanoyl-ACP<=>(1.00)H2O+(1.00)8-methyl-trans-dec-2-enoyl-ACP	(1.00)cpd11505[c]<=>(1.00)cpd00001[c]+(1.00)cpd11506[c]		-1000	1000	1	0
rxn07441	2.6.1.83	R07613	(1.00)2-Oxoglutarate+(1.00)LL-2,6-Diaminopimelate<=>(1.00)H++(1.00)H2O+(1.00)tetrahydrodipicolinate+(1.00)L-Glutamate	(1.00)cpd00024[c]+(1.00)cpd00504[c]<=>(1.00)cpd00067[c]+(1.00)cpd00001[c]+(1.00)cpd02465[c]+(1.00)cpd00023[c]		-1000	1000	1	0
rxn01834	4.4.1.5	R02530	(1.00)(R)-S-Lactoylglutathione<=>(1.00)GSH+(1.00)2-Oxopropanal	(1.00)cpd02182[c]<=>(1.00)cpd00042[c]+(1.00)cpd00428[c]		-1000	1000	1	0
rxn02504	4.1.2.25	R03504	(1.00)Dihydroneopterin<=>(1.00)Glycolaldehyde+(1.00)6-hydroxymethyl_dihydropterin	(1.00)cpd02961[c]<=>(1.00)cpd00229[c]+(1.00)cpd00954[c]		-1000	1000	1	0
rxn05543	3.A.1.5|3.|.1.5		(1.00)Ala-His+(1.00)H2O+(1.00)ATP<=>(1.00)Phosphate+(1.00)H++(1.00)Ala-His+(1.00)ADP	(1.00)cpd11584[e]+(1.00)cpd00001[c]+(1.00)cpd00002[c]<=>(1.00)cpd00009[c]+(1.00)cpd00067[c]+(1.00)cpd11584[c]+(1.00)cpd00008[c]		0	1000	0	0
rxn10473	no match		(1.00)Cl-<=>(1.00)Cl-	(1.00)cpd00099[e]<=>(1.00)cpd00099[c]		-1000	1000	1	0
rxn01103	3.6.1.7	R01515	(1.00)H2O+(1.00)1,3-Bisphospho-D-glycerate<=>(1.00)Phosphate+(1.00)3-Phosphoglycerate+(2.00)H+	(1.00)cpd00001[c]+(1.00)cpd00203[c]<=>(1.00)cpd00009[c]+(1.00)cpd00169[c]+(2.00)cpd00067[c]		0	1000	0	0
rxn01345	3.1.3.11|3.1.3.37	R01845	(1.00)H2O+(1.00)Sedoheptulose_1,7-bisphosphate<=>(1.00)Phosphate+(1.00)H++(1.00)Sedoheptulose7-phosphate	(1.00)cpd00001[c]+(1.00)cpd00349[c]<=>(1.00)cpd00009[c]+(1.00)cpd00067[c]+(1.00)cpd00238[c]		0	1000	0	0
rxn01127	2.7.4.3	R01547	(1.00)ATP+(1.00)dAMP<=>(1.00)dADP+(1.00)ADP	(1.00)cpd00002[c]+(1.00)cpd00294[c]<=>(1.00)cpd00177[c]+(1.00)cpd00008[c]		0	1000	1	0
rxn05223	no match		(1.00)BIOT+(1.00)H2O+(1.00)ATP<=>(1.00)Phosphate+(1.00)H++(1.00)BIOT+(1.00)ADP	(1.00)cpd00104[e]+(1.00)cpd00001[c]+(1.00)cpd00002[c]<=>(1.00)cpd00009[c]+(1.00)cpd00067[c]+(1.00)cpd00104[c]+(1.00)cpd00008[c]		0	1000	0	0
rxn05409	2.3.1.0		(1.00)H++(1.00)Malonyl-acyl-carrierprotein-+(1.00)isobutyryl-ACP<=>(1.00)ACP+(1.00)4-methyl-3-oxo-pentanoyl-ACP+(1.00)CO2	(1.00)cpd00067[c]+(1.00)cpd11492[c]+(1.00)cpd11545[c]<=>(1.00)cpd11493[c]+(1.00)cpd11546[c]+(1.00)cpd00011[c]		0	1000	0	0
rxn01073	3.1.4.2|3.1.4.46	R01470	(1.00)Glycerophosphoethanolamine+(1.00)H2O<=>(1.00)Aminoethanol+(1.00)Glycerol-3-phosphate	(1.00)cpd00908[c]+(1.00)cpd00001[c]<=>(1.00)cpd00162[c]+(1.00)cpd00080[c]		0	1000	0	0
rxn08975	no match		(1.00)H++(1.00)Ubiquinone-8+(1.00)NADH<=>(1.00)Ubiquinol-8+(1.00)NAD	(1.00)cpd00067[c]+(1.00)cpd15560[c]+(1.00)cpd00004[c]<=>(1.00)cpd15561[c]+(1.00)cpd00003[c]		0	0	0	0
rxn01226	3.2.2.1	R01677	(1.00)H2O+(1.00)Guanosine<=>(1.00)Guanine+(1.00)D-Ribose	(1.00)cpd00001[c]+(1.00)cpd00311[c]<=>(1.00)cpd00207[c]+(1.00)cpd00105[c]		-1000	1000	1	0
rxn10314	no match		(24.00)UDP-N-acetylglucosamine+(1.00)Anteisopentadecanoyllipoteichoic_acid (n=24), linked, unsubstituted<=>(24.00)UDP+(1.00)Anteisopentadecanoyllipoteichoic_acid (n=24), linked, N-acetyl-D-glucosamine	(24.00)cpd00037[c]+(1.00)cpd15753[c]<=>(24.00)cpd00014[c]+(1.00)cpd15771[c]		-1000	1000	1	0
rxn00904	2.6.1.66	R01215	(1.00)Pyruvate+(1.00)L-Valine<=>(1.00)3-Methyl-2-oxobutanoate+(1.00)L-Alanine	(1.00)cpd00020[c]+(1.00)cpd00156[c]<=>(1.00)cpd00123[c]+(1.00)cpd00035[c]		-1000	1000	1	0
rxn05534	3.A.1.5|3.|.1.5		(1.00)gly-glu-L+(1.00)H2O+(1.00)ATP<=>(1.00)Phosphate+(1.00)H++(1.00)gly-glu-L+(1.00)ADP	(1.00)cpd11592[e]+(1.00)cpd00001[c]+(1.00)cpd00002[c]<=>(1.00)cpd00009[c]+(1.00)cpd00067[c]+(1.00)cpd11592[c]+(1.00)cpd00008[c]		0	1000	0	0
rxn05175	no match		(1.00)H2O+(1.00)ATP+(1.00)Spermidine<=>(1.00)Phosphate+(1.00)H++(1.00)ADP+(1.00)Spermidine	(1.00)cpd00001[c]+(1.00)cpd00002[c]+(1.00)cpd00264[e]<=>(1.00)cpd00009[c]+(1.00)cpd00067[c]+(1.00)cpd00008[c]+(1.00)cpd00264[c]		0	1000	0	0
rxn03918	2.7.-.-|2.7.1.-	R05646	(1.00)ATP+(1.00)D-Glycero-D-manno-heptose7-phosphate<=>(1.00)D-Glycero-D-manno-heptose1-7-bisphosphate+(1.00)ADP	(1.00)cpd00002[c]+(1.00)cpd04918[c]<=>(1.00)cpd08316[c]+(1.00)cpd00008[c]		0	1000	1	0
rxn08294	2.7.1.107		(1.00)1,2-Diacyl-sn-glycerol_didodecanoyl+(1.00)ATP<=>(1.00)ADP+(1.00)1,2-didodecanoyl-sn-glycerol_3-phosphate	(1.00)cpd15306[c]+(1.00)cpd00002[c]<=>(1.00)cpd00008[c]+(1.00)cpd15521[c]		0	1000	1	0
rxn00493	2.6.1.1|2.6.1.9	R00694	(1.00)L-Phenylalanine+(1.00)2-Oxoglutarate<=>(1.00)Phenylpyruvate+(1.00)L-Glutamate	(1.00)cpd00066[c]+(1.00)cpd00024[c]<=>(1.00)cpd00143[c]+(1.00)cpd00023[c]		-1000	1000	1	0
rxn08528	no match		(1.00)2-Demethylmenaquinol_8+(1.00)Fumarate<=>(1.00)2-Demethylmenaquinone_8+(1.00)Succinate	(1.00)cpd15353[c]+(1.00)cpd00106[c]<=>(1.00)cpd15352[c]+(1.00)cpd00036[c]		-1000	1000	1	0
rxn01351	3.6.1.19	R01855	(1.00)H2O+(1.00)dGTP<=>(1.00)dGMP+(1.00)PPi	(1.00)cpd00001[c]+(1.00)cpd00241[c]<=>(1.00)cpd00296[c]+(1.00)cpd00012[c]		0	1000	0	0
rxn01509	2.7.4.8	R02090	(1.00)dGMP+(1.00)ATP<=>(1.00)ADP+(1.00)dGDP	(1.00)cpd00296[c]+(1.00)cpd00002[c]<=>(1.00)cpd00008[c]+(1.00)cpd00295[c]		0	1000	1	0
rxn08309	2.7.7.41		(1.00)1,2-dihexadecanoyl-sn-glycerol_3-phosphate+(1.00)CTP<=>(1.00)PPi+(1.00)CDP-1,2-dihexadecanoylglycerol	(1.00)cpd15524[c]+(1.00)cpd00052[c]<=>(1.00)cpd00012[c]+(1.00)cpd15419[c]		-1000	1000	1	0
rxn05381	4.2.1.0		(1.00)14-methyl-3-hydroxy-hexa-decanoyl-ACP<=>(1.00)14-methyl-trans-hexa-dec-2-enoyl-ACP+(1.00)H2O	(1.00)cpd11517[c]<=>(1.00)cpd11518[c]+(1.00)cpd00001[c]		-1000	1000	1	0
rxn00912	2.1.2.11	R01226	(1.00)3-Methyl-2-oxobutanoate+(1.00)H2O+(1.00)5-10-Methylenetetrahydrofolate<=>(1.00)Tetrahydrofolate+(1.00)2-Dehydropantoate	(1.00)cpd00123[c]+(1.00)cpd00001[c]+(1.00)cpd00125[c]<=>(1.00)cpd00087[c]+(1.00)cpd00712[c]		-1000	1000	1	0
rxn05446	1.3.1.0		(1.00)6-methyl-trans-hept-2-enoyl-ACP+(1.00)H++(1.00)NADH<=>(1.00)6-methyl-heptanoyl-ACP+(1.00)NAD	(1.00)cpd11552[c]+(1.00)cpd00067[c]+(1.00)cpd00004[c]<=>(1.00)cpd11553[c]+(1.00)cpd00003[c]		0	1000	0	0
rxn01437	3.5.1.9	R01959	(1.00)H2O+(1.00)N-Formylkynurenine<=>(1.00)L-Kynurenine+(1.00)H++(1.00)Formate	(1.00)cpd00001[c]+(1.00)cpd01749[c]<=>(1.00)cpd00275[c]+(1.00)cpd00067[c]+(1.00)cpd00047[c]		-1000	1000	1	0
rxn00604	1.1.1.49	R00835	(1.00)NADP+(1.00)D-glucose-6-phosphate<=>(1.00)NADPH+(1.00)H++(1.00)6-phospho-D-glucono-1-5-lactone	(1.00)cpd00006[c]+(1.00)cpd00079[c]<=>(1.00)cpd00005[c]+(1.00)cpd00067[c]+(1.00)cpd00911[c]		-1000	1000	1	0
rxn05386	4.2.1.0		(1.00)5-methyl-3-hydroxy-hexanoyl-ACP<=>(1.00)H2O+(1.00)5-methyl-trans-hex-2-enoyl-ACP	(1.00)cpd11522[c]<=>(1.00)cpd00001[c]+(1.00)cpd11523[c]		-1000	1000	1	0
rxn05414	1.1.1.0		(1.00)NADPH+(1.00)H++(1.00)6-methyl-3-oxo-heptanoyl-ACP<=>(1.00)6-methyl-3-hydroxy-heptanoyl-ACP+(1.00)NADP	(1.00)cpd00005[c]+(1.00)cpd00067[c]+(1.00)cpd11550[c]<=>(1.00)cpd11551[c]+(1.00)cpd00006[c]		-1000	1000	1	0
rxn03892	2.5.1.33	R05613	(1.00)Isopentenyldiphosphate+(1.00)pendp<=>(1.00)PPi+(1.00)all-trans-Hexaprenyl_diphosphate	(1.00)cpd00113[c]+(1.00)cpd02591[c]<=>(1.00)cpd00012[c]+(1.00)cpd00906[c]		0	1000	0	0
rxn05390	4.2.1.0		(1.00)7-methyl-3-hydroxy-octanoyl-ACP<=>(1.00)7-methyl-trans-oct-2-enoyl-ACP+(1.00)H2O	(1.00)cpd11526[c]<=>(1.00)cpd11527[c]+(1.00)cpd00001[c]		-1000	1000	1	0
rxn00789	2.4.2.17	R01071	(1.00)PPi+(1.00)Phosphoribosyl-ATP<=>(1.00)PRPP+(1.00)ATP	(1.00)cpd00012[c]+(1.00)cpd01775[c]<=>(1.00)cpd00103[c]+(1.00)cpd00002[c]		-1000	0	0	0
rxn05435	1.3.1.0		(1.00)H++(1.00)NADH+(1.00)8-methyl-trans-dec-2-enoyl-ACP<=>(1.00)8-methyl-decanoyl-ACP+(1.00)NAD	(1.00)cpd00067[c]+(1.00)cpd00004[c]+(1.00)cpd11506[c]<=>(1.00)cpd11507[c]+(1.00)cpd00003[c]		0	1000	0	0
rxn05461	1.1.1.0		(1.00)NADPH+(1.00)H++(1.00)3-Oxooctodecanoyl-ACP<=>(1.00)3-Hydroxyoctodecanoyl-ACP+(1.00)NADP	(1.00)cpd00005[c]+(1.00)cpd00067[c]+(1.00)cpd11570[c]<=>(1.00)cpd11571[c]+(1.00)cpd00006[c]		-1000	1000	1	0
rxn00641	2.7.7.13	R00885	(1.00)D-Mannose1-phosphate+(1.00)GTP<=>(1.00)PPi+(1.00)GDP-mannose	(1.00)cpd00485[c]+(1.00)cpd00038[c]<=>(1.00)cpd00012[c]+(1.00)cpd00083[c]		-1000	1000	1	0
rxn12844	3.4.11.2		(1.00)H2O+(1.00)Gly-Cys<=>(1.00)Glycine+(1.00)L-Cysteine	(1.00)cpd00001[c]+(1.00)cpd15603[c]<=>(1.00)cpd00033[c]+(1.00)cpd00084[c]		-1000	1000	1	0
rxn00692	2.1.2.1	R00945	(1.00)Glycine+(1.00)H2O+(1.00)5-10-Methylenetetrahydrofolate<=>(1.00)Tetrahydrofolate+(1.00)L-Serine	(1.00)cpd00033[c]+(1.00)cpd00001[c]+(1.00)cpd00125[c]<=>(1.00)cpd00087[c]+(1.00)cpd00054[c]		-1000	1000	1	0
rxn00508	1.2.1.16	R00713	(1.00)H2O+(1.00)NAD+(1.00)4-Oxobutanoate<=>(2.00)H++(1.00)NADH+(1.00)Succinate	(1.00)cpd00001[c]+(1.00)cpd00003[c]+(1.00)cpd00199[c]<=>(2.00)cpd00067[c]+(1.00)cpd00004[c]+(1.00)cpd00036[c]		0	1000	0	0
rxn01678	2.7.4.6	R02331	(1.00)ATP+(1.00)dUDP<=>(1.00)dUTP+(1.00)ADP	(1.00)cpd00002[c]+(1.00)cpd00978[c]<=>(1.00)cpd00358[c]+(1.00)cpd00008[c]		0	1000	1	0
rxn08312	2.7.7.41		(1.00)1,2-dioctadec-11-enoyl-sn-glycerol_3-phosphate+(1.00)CTP<=>(1.00)PPi+(1.00)CDP-1,2-dioctadec-11-enoylglycerol	(1.00)cpd15527[c]+(1.00)cpd00052[c]<=>(1.00)cpd00012[c]+(1.00)cpd15420[c]		-1000	1000	1	0
rxn10481	no match		(1.00)Cu2++(1.00)H2O+(1.00)ATP<=>(1.00)Phosphate+(1.00)Cu2++(1.00)H++(1.00)ADP	(1.00)cpd00058[e]+(1.00)cpd00001[c]+(1.00)cpd00002[c]<=>(1.00)cpd00009[c]+(1.00)cpd00058[c]+(1.00)cpd00067[c]+(1.00)cpd00008[c]		0	1000	0	0
rxn09108	2.7.8.5		(1.00)Glycerol-3-phosphate+(1.00)CDP-1,2-didodecanoylglycerol<=>(1.00)Phosphatidylglycerophosphate_didodecanoyl+(1.00)CMP	(1.00)cpd00080[c]+(1.00)cpd15417[c]<=>(1.00)cpd15542[c]+(1.00)cpd00046[c]		-1000	1000	1	0
rxn01332	2.5.1.54	R01826	(1.00)H2O+(1.00)Phosphoenolpyruvate+(1.00)D-Erythrose4-phosphate<=>(1.00)Phosphate+(1.00)H++(1.00)DAHP	(1.00)cpd00001[c]+(1.00)cpd00061[c]+(1.00)cpd00236[c]<=>(1.00)cpd00009[c]+(1.00)cpd00067[c]+(1.00)cpd02857[c]		0	1000	0	0
rxn03068	1.1.1.86	R04440	(1.00)2,3-Dihydroxy-isovalerate+(1.00)NADP<=>(1.00)NADPH+(1.00)2-Oxo-3-hydroxyisovalerate+(1.00)H+	(1.00)cpd02498[c]+(1.00)cpd00006[c]<=>(1.00)cpd00005[c]+(1.00)cpd02569[c]+(1.00)cpd00067[c]		-1000	1000	1	0
rxn06077	1.8.4.13|1.8.4.14	R02025	(1.00)trdox+(1.00)H2O+(1.00)L-Methionine<=>(1.00)trdrd+(1.00)L-Methionine_S-oxide	(1.00)cpd11420[c]+(1.00)cpd00001[c]+(1.00)cpd00060[c]<=>(1.00)cpd11421[c]+(1.00)cpd01914[c]		-1000	1000	1	0
rxn11703	4.2.99.20	R08166	(1.00)2-Succinyl-5-enolpyruvyl-6-hydroxy-3-cyclohexene-1-carboxylate<=>(1.00)Pyruvate+(1.00)SHCHC	(1.00)cpd16335[c]<=>(1.00)cpd00020[c]+(1.00)cpd03451[c]		0	1000	0	0
rxn01858	3.5.4.4	R02556	(1.00)H++(1.00)H2O+(1.00)Deoxyadenosine<=>(1.00)NH3+(1.00)Deoxyinosine	(1.00)cpd00067[c]+(1.00)cpd00001[c]+(1.00)cpd00438[c]<=>(1.00)cpd00013[c]+(1.00)cpd03279[c]		0	1000	0	0
rxn12849	3.A.1.5		(1.00)Gly-Leu+(1.00)H2O+(1.00)ATP<=>(1.00)Phosphate+(1.00)H++(1.00)Gly-Leu+(1.00)ADP	(1.00)cpd15604[e]+(1.00)cpd00001[c]+(1.00)cpd00002[c]<=>(1.00)cpd00009[c]+(1.00)cpd00067[c]+(1.00)cpd15604[c]+(1.00)cpd00008[c]		0	1000	0	0
rxn00772	2.7.1.15	R01051	(1.00)D-Ribose+(1.00)ATP<=>(1.00)ADP+(1.00)ribose-5-phosphate	(1.00)cpd00105[c]+(1.00)cpd00002[c]<=>(1.00)cpd00008[c]+(1.00)cpd00101[c]		0	1000	1	0
rxn01545	3.2.2.1	R02143	(1.00)H2O+(1.00)Xanthosine<=>(1.00)D-Ribose+(1.00)XAN	(1.00)cpd00001[c]+(1.00)cpd01217[c]<=>(1.00)cpd00105[c]+(1.00)cpd00309[c]		-1000	1000	1	0
rxn00410	6.3.4.2	R00571	(1.00)NH3+(1.00)ATP+(1.00)UTP<=>(1.00)Phosphate+(2.00)H++(1.00)CTP+(1.00)ADP	(1.00)cpd00013[c]+(1.00)cpd00002[c]+(1.00)cpd00062[c]<=>(1.00)cpd00009[c]+(2.00)cpd00067[c]+(1.00)cpd00052[c]+(1.00)cpd00008[c]		0	1000	1	0
rxn08299	2.7.1.107		(1.00)1,2-Diacyl-sn-glycerol_dioctadecanoyl+(1.00)ATP<=>(1.00)1,2-dioctadecanoyl-sn-glycerol_3-phosphate+(1.00)ADP	(1.00)cpd15311[c]+(1.00)cpd00002[c]<=>(1.00)cpd15526[c]+(1.00)cpd00008[c]		0	1000	1	0
rxn08657	no match		(1.00)2-Demethylmenaquinone_8+(1.00)Glycolate<=>(1.00)2-Demethylmenaquinol_8+(1.00)Glyoxalate	(1.00)cpd15352[c]+(1.00)cpd00139[c]<=>(1.00)cpd15353[c]+(1.00)cpd00040[c]		0	1000	0	0
rxn02895	6.3.4.13	R04144	(1.00)5-Phosphoribosylamine+(1.00)Glycine+(1.00)ATP<=>(1.00)Phosphate+(1.00)H++(1.00)GAR+(1.00)ADP	(1.00)cpd01982[c]+(1.00)cpd00033[c]+(1.00)cpd00002[c]<=>(1.00)cpd00009[c]+(1.00)cpd00067[c]+(1.00)cpd02394[c]+(1.00)cpd00008[c]		0	1000	0	0
rxn10216	2.3.1.51		(1.00)fa1coa+(1.00)1-isotetradecanoyl-sn-glycerol_3-phosphate<=>(1.00)1,2-diisotetradecanoyl-sn-glycerol_3-phosphate+(1.00)CoA	(1.00)cpd11435[c]+(1.00)cpd15673[c]<=>(1.00)cpd15679[c]+(1.00)cpd00010[c]		0	1000	0	0
rxn05361	4.2.1.0		(1.00)4-methyl-3-hydroxy-hexanoyl-ACP<=>(1.00)4-methyl-trans-hex-2-enoyl-ACP+(1.00)H2O	(1.00)cpd11497[c]<=>(1.00)cpd11498[c]+(1.00)cpd00001[c]		-1000	1000	1	0
rxn00002	3.5.1.54	R00005	(1.00)Allophanate+(3.00)H++(1.00)H2O<=>(2.00)NH3+(2.00)CO2	(1.00)cpd00742[c]+(3.00)cpd00067[c]+(1.00)cpd00001[c]<=>(2.00)cpd00013[c]+(2.00)cpd00011[c]		0	1000	0	0
rxn02792	2.3.2.2		(1.00)H++(1.00)L-3-Cyanoalanine+(1.00)L-Glutamate<=>(1.00)gamma-Glutamyl-3-aminopropiononitrile+(1.00)H2O+(1.00)CO2	(1.00)cpd00067[c]+(1.00)cpd01651[c]+(1.00)cpd00023[c]<=>(1.00)cpd03646[c]+(1.00)cpd00001[c]+(1.00)cpd00011[c]		0	1000	0	0
rxn01115	1.1.1.44	R01528	(1.00)6-Phospho-D-gluconate+(1.00)NADP<=>(1.00)NADPH+(1.00)CO2+(1.00)D-Ribulose5-phosphate	(1.00)cpd00284[c]+(1.00)cpd00006[c]<=>(1.00)cpd00005[c]+(1.00)cpd00011[c]+(1.00)cpd00171[c]		0	1000	0	0
rxn05256	1.8.4.10	R07176	(1.00)APS+(1.00)trdrd<=>(1.00)trdox+(1.00)Sulfite+(1.00)AMP	(1.00)cpd00193[c]+(1.00)cpd11421[c]<=>(1.00)cpd11420[c]+(1.00)cpd00081[c]+(1.00)cpd00018[c]		0	1000	0	0
rxn02312	2.6.1.62	R03231	(1.00)8-Amino-7-oxononanoate+(1.00)S-Adenosyl-L-methionine<=>(1.00)S-Adenosyl-4-methylthio-2-oxobutanoate+(1.00)7-8-Diaminononanoate	(1.00)cpd00800[c]+(1.00)cpd00017[c]<=>(1.00)cpd02701[c]+(1.00)cpd00764[c]		-1000	1000	1	0
rxn08971	no match		(1.00)H++(1.00)NADH+(1.00)Menaquinone_8<=>(1.00)Menaquinol_8+(1.00)NAD	(1.00)cpd00067[c]+(1.00)cpd00004[c]+(1.00)cpd15500[c]<=>(1.00)cpd15499[c]+(1.00)cpd00003[c]		0	1000	0	0
rxn10060	2.7.1.23		(1.00)TTP+(1.00)NAD<=>(1.00)dTDP+(1.00)NADP	(1.00)cpd00357[c]+(1.00)cpd00003[c]<=>(1.00)cpd00297[c]+(1.00)cpd00006[c]		-1000	1000	1	0
rxn05405	1.1.1.0		(1.00)15-methyl-3-oxo-hexa-decanoyl-ACP+(1.00)NADPH+(1.00)H+<=>(1.00)15-methyl-3-hydroxy-hexa-decanoyl-ACP+(1.00)NADP	(1.00)cpd11541[c]+(1.00)cpd00005[c]+(1.00)cpd00067[c]<=>(1.00)cpd11542[c]+(1.00)cpd00006[c]		-1000	1000	1	0
rxn00438	2.7.4.16	R00617	(1.00)ATP+(1.00)Thiamine_phosphate<=>(1.00)ADP+(1.00)TPP	(1.00)cpd00002[c]+(1.00)cpd00793[c]<=>(1.00)cpd00008[c]+(1.00)cpd00056[c]		0	1000	1	0
rxn01109	1.1.1.47	R01521	(1.00)beta-D-Glucose+(1.00)NADP<=>(1.00)NADPH+(1.00)H++(1.00)Gluconolactone	(1.00)cpd00190[c]+(1.00)cpd00006[c]<=>(1.00)cpd00005[c]+(1.00)cpd00067[c]+(1.00)cpd00170[c]		-1000	1000	1	0
rxn05368	1.1.1.0		(1.00)NADPH+(1.00)8-methyl-3-oxo-decanoyl-ACP+(1.00)H+<=>(1.00)8-methyl-3-hydroxy-decanoyl-ACP+(1.00)NADP	(1.00)cpd00005[c]+(1.00)cpd11504[c]+(1.00)cpd00067[c]<=>(1.00)cpd11505[c]+(1.00)cpd00006[c]		-1000	1000	1	0
rxn03951	1.1.1.262	R05681	(1.00)4-(Phosphonooxy)-threonine+(1.00)NAD<=>(1.00)H++(1.00)NADH+(1.00)2-Amino-3-oxo-4-phosphonooxybutyrate	(1.00)cpd03607[c]+(1.00)cpd00003[c]<=>(1.00)cpd00067[c]+(1.00)cpd00004[c]+(1.00)cpd04539[c]		-1000	1000	1	0
rxn00568	1.7.1.4		(1.00)NH3+(2.00)H2O+(3.00)NAD<=>(1.00)Nitrite+(5.00)H++(3.00)NADH	(1.00)cpd00013[c]+(2.00)cpd00001[c]+(3.00)cpd00003[c]<=>(1.00)cpd00075[c]+(5.00)cpd00067[c]+(3.00)cpd00004[c]		-1000	0	0	0
rxn05456	2.3.1.0		(1.00)14-methyl-pentadecanoyl-ACP+(1.00)CoA<=>(1.00)fa6coa+(1.00)ACP	(1.00)cpd11569[c]+(1.00)cpd00010[c]<=>(1.00)cpd11441[c]+(1.00)cpd11493[c]		-1000	1000	1	0
rxn12634	no match		(1.00)gly-glu-L+(1.00)H2O<=>(1.00)Glycine+(1.00)L-Glutamate	(1.00)cpd11592[c]+(1.00)cpd00001[c]<=>(1.00)cpd00033[c]+(1.00)cpd00023[c]		-1000	1000	1	0
rxn10261	2.7.8.5		(1.00)CDP-1,2-diisotetradecanoylglycerol+(1.00)Glycerol-3-phosphate<=>(1.00)Diisotetradecanoylphosphatidylglycerophosphate+(1.00)CMP	(1.00)cpd15685[c]+(1.00)cpd00080[c]<=>(1.00)cpd15718[c]+(1.00)cpd00046[c]		-1000	1000	1	0
rxn06377	1.4.4.2	R03425	(1.00)H++(1.00)Glycine+(1.00)Lipoylprotein<=>(1.00)S-Aminomethyldihydrolipoylprotein+(1.00)CO2	(1.00)cpd00067[c]+(1.00)cpd00033[c]+(1.00)cpd12005[c]<=>(1.00)cpd11830[c]+(1.00)cpd00011[c]		0	1000	0	0
rxn05149	3.A.1.15		(1.00)H2O+(1.00)ATP+(1.00)Mn2+<=>(1.00)Phosphate+(1.00)H++(1.00)ADP+(1.00)Mn2+	(1.00)cpd00001[c]+(1.00)cpd00002[c]+(1.00)cpd00030[e]<=>(1.00)cpd00009[c]+(1.00)cpd00067[c]+(1.00)cpd00008[c]+(1.00)cpd00030[c]		0	1000	0	0
rxn00300	3.5.4.25	R00425	(3.00)H2O+(1.00)GTP<=>(1.00)H++(1.00)PPi+(1.00)Formate+(1.00)2,5-Diamino-6-(5-phosphoribosylamino)-4-pyrimidineone	(3.00)cpd00001[c]+(1.00)cpd00038[c]<=>(1.00)cpd00067[c]+(1.00)cpd00012[c]+(1.00)cpd00047[c]+(1.00)cpd00957[c]		0	1000	0	0
rxn00206	1.15.1.1	R00275	(2.00)O2-<=>(1.00)O2+(1.00)H2O2	(2.00)cpd00532[c]<=>(1.00)cpd00007[c]+(1.00)cpd00025[c]		0	1000	0	0
rxn00400	1.14.13.39	R00558	(1.00)NADPH+(1.00)O2+(1.00)L-Arginine<=>(1.00)H2O+(1.00)N-(omega)-Hydroxyarginine+(1.00)NADP	(1.00)cpd00005[c]+(1.00)cpd00007[c]+(1.00)cpd00051[c]<=>(1.00)cpd00001[c]+(1.00)cpd03527[c]+(1.00)cpd00006[c]		0	1000	0	0
rxn01962	3.6.1.19	R02720	(1.00)XTP+(1.00)H2O<=>(1.00)XMP+(1.00)PPi	(1.00)cpd00530[c]+(1.00)cpd00001[c]<=>(1.00)cpd00497[c]+(1.00)cpd00012[c]		0	1000	0	0
rxn02288	4.1.1.37	R03197	(4.00)H++(1.00)UroporphyrinogenIII<=>(4.00)CO2+(1.00)CoproporphyrinogenIII	(4.00)cpd00067[c]+(1.00)cpd00774[c]<=>(4.00)cpd00011[c]+(1.00)cpd02083[c]		-1000	1000	1	0
rxn00907	1.5.1.5	R01220	(1.00)NADP+(1.00)5-10-Methylenetetrahydrofolate<=>(1.00)NADPH+(1.00)5-10-Methenyltetrahydrofolate	(1.00)cpd00006[c]+(1.00)cpd00125[c]<=>(1.00)cpd00005[c]+(1.00)cpd00347[c]		-1000	1000	1	0
rxn02959	2.1.1.11	R04237	(1.00)Mg-protoporphyrin_IX+(1.00)S-Adenosyl-L-methionine<=>(1.00)Mg-Protoporphyrin_IX 13-monomethyl ester+(1.00)S-Adenosyl-homocysteine	(1.00)cpd02216[c]+(1.00)cpd00017[c]<=>(1.00)cpd02762[c]+(1.00)cpd00019[c]		-1000	1000	1	0
rxn05619	3.A.1.8|3.|.1.8		(1.00)H2O+(1.00)Molybdate+(1.00)ATP<=>(1.00)Phosphate+(1.00)H++(1.00)Molybdate+(1.00)ADP	(1.00)cpd00001[c]+(1.00)cpd11574[e]+(1.00)cpd00002[c]<=>(1.00)cpd00009[c]+(1.00)cpd00067[c]+(1.00)cpd11574[c]+(1.00)cpd00008[c]		0	1000	0	0
rxn05327	1.3.1.9	R04961	(1.00)Decanoyl-ACP+(1.00)NAD<=>(1.00)(2E)-Decenoyl-[acp]+(1.00)H++(1.00)NADH	(1.00)cpd11474[c]+(1.00)cpd00003[c]<=>(1.00)cpd11475[c]+(1.00)cpd00067[c]+(1.00)cpd00004[c]		-1000	0	0	0
rxn00762	1.1.1.6	R01034	(1.00)Glycerol+(1.00)NAD<=>(1.00)H++(1.00)NADH+(1.00)Glycerone	(1.00)cpd00100[c]+(1.00)cpd00003[c]<=>(1.00)cpd00067[c]+(1.00)cpd00004[c]+(1.00)cpd00157[c]		-1000	1000	1	0
rxn05423	4.2.1.0		(1.00)10-methyl-3-hydroxy-undecanoyl-ACP<=>(1.00)10-methyl-trans-undec-2-enoyl-ACP+(1.00)H2O	(1.00)cpd11559[c]<=>(1.00)cpd11560[c]+(1.00)cpd00001[c]		-1000	1000	1	0
rxn05410	1.1.1.0		(1.00)NADPH+(1.00)H++(1.00)4-methyl-3-oxo-pentanoyl-ACP<=>(1.00)4-methyl-3-hydroxy-pentanoyl-ACP+(1.00)NADP	(1.00)cpd00005[c]+(1.00)cpd00067[c]+(1.00)cpd11546[c]<=>(1.00)cpd11547[c]+(1.00)cpd00006[c]		-1000	1000	1	0
rxn05902	1.8.7.1		(3.00)Oxidizedferredoxin+(1.00)H2S+(3.00)H2O<=>(3.00)Reducedferredoxin+(1.00)Sulfite+(7.00)H+	(3.00)cpd11621[c]+(1.00)cpd00239[c]+(3.00)cpd00001[c]<=>(3.00)cpd11620[c]+(1.00)cpd00081[c]+(7.00)cpd00067[c]		-1000	0	1	0
rxn00509	1.2.1.16	R00714	(1.00)H2O+(1.00)NADP+(1.00)4-Oxobutanoate<=>(1.00)NADPH+(2.00)H++(1.00)Succinate	(1.00)cpd00001[c]+(1.00)cpd00006[c]+(1.00)cpd00199[c]<=>(1.00)cpd00005[c]+(2.00)cpd00067[c]+(1.00)cpd00036[c]		0	1000	0	0
rxn04048	2.1.1.133	R05810	(1.00)Cobalt-precorrin_4+(1.00)S-Adenosyl-L-methionine<=>(1.00)Cobalt-precorrin_5+(1.00)S-Adenosyl-homocysteine	(1.00)cpd08370[c]+(1.00)cpd00017[c]<=>(1.00)cpd08371[c]+(1.00)cpd00019[c]		-1000	1000	1	0
rxn10344	no match		(1.00)H2O+(1.00)ATP+(1.00)Pb_Pb<=>(1.00)Phosphate+(1.00)H++(1.00)ADP+(1.00)Pb_Pb	(1.00)cpd00001[c]+(1.00)cpd00002[c]+(1.00)cpd04097[c]<=>(1.00)cpd00009[c]+(1.00)cpd00067[c]+(1.00)cpd00008[c]+(1.00)cpd04097[e]		0	1000	0	0
rxn12224	no match		(1.00)2-Octaprenyl-6-methoxyphenol+(1.00)O2<=>(1.00)2-Octaprenyl-6-methoxy-1,4-benzoquinone+(1.00)H2O	(1.00)cpd03446[c]+(1.00)cpd00007[c]<=>(1.00)cpd03447[c]+(1.00)cpd00001[c]		0	1000	0	0
rxn07295	1.4.3.19	R07463	(1.00)Glycine<=>(1.00)Iminoglycine+(3.00)H+	(1.00)cpd00033[c]<=>(1.00)cpd14545[c]+(3.00)cpd00067[c]		0	1000	0	0
rxn00782	1.2.1.12|1.2.1.13|1.2.1.59	R01063	(1.00)Phosphate+(1.00)NADP+(1.00)Glyceraldehyde3-phosphate<=>(1.00)NADPH+(1.00)1,3-Bisphospho-D-glycerate	(1.00)cpd00009[c]+(1.00)cpd00006[c]+(1.00)cpd00102[c]<=>(1.00)cpd00005[c]+(1.00)cpd00203[c]		-1000	0	0	0
rxn00205	1.11.1.9	R00274	(2.00)GSH+(1.00)H2O2<=>(1.00)Oxidized_glutathione+(2.00)H2O	(2.00)cpd00042[c]+(1.00)cpd00025[c]<=>(1.00)cpd00111[c]+(2.00)cpd00001[c]		0	1000	0	0
rxn06673	6.4.1.2	R04386	(1.00)Carboxybiotin-carboxyl-carrier_protein+(1.00)Acetyl-CoA<=>(1.00)Holo-[carboxylase]+(1.00)Malonyl-CoA	(1.00)cpd12543[c]+(1.00)cpd00022[c]<=>(1.00)cpd12848[c]+(1.00)cpd00070[c]		0	1000	0	0
rxn00278	1.4.1.1	R00396	(1.00)H2O+(1.00)L-Alanine+(1.00)NAD<=>(1.00)NH3+(1.00)H++(1.00)Pyruvate+(1.00)NADH	(1.00)cpd00001[c]+(1.00)cpd00035[c]+(1.00)cpd00003[c]<=>(1.00)cpd00013[c]+(1.00)cpd00067[c]+(1.00)cpd00020[c]+(1.00)cpd00004[c]		-1000	1000	1	0
rxn00790	2.4.2.14	R01072	(1.00)5-Phosphoribosylamine+(1.00)PPi+(1.00)L-Glutamate<=>(1.00)L-Glutamine+(1.00)PRPP+(1.00)H2O	(1.00)cpd01982[c]+(1.00)cpd00012[c]+(1.00)cpd00023[c]<=>(1.00)cpd00053[c]+(1.00)cpd00103[c]+(1.00)cpd00001[c]		-1000	0	0	0
rxn05106	3.1.3.77	R07394	(1.00)H2O+(1.00)2-Hydroxy-3-keto-5-methylthiopentenyl-1-phosphate<=>(1.00)Phosphate+(1.00)H++(1.00)1,2-dihydroxy-3-keto-5-methylthiopentene	(1.00)cpd00001[c]+(1.00)cpd11296[c]<=>(1.00)cpd00009[c]+(1.00)cpd00067[c]+(1.00)cpd11255[c]		0	1000	0	0
rxn01169	2.7.1.2	R01600	(1.00)beta-D-Glucose+(1.00)ATP<=>(1.00)ADP+(1.00)beta-D-Glucose_6-phosphate	(1.00)cpd00190[c]+(1.00)cpd00002[c]<=>(1.00)cpd00008[c]+(1.00)cpd00863[c]		0	1000	1	0
rxn00365	2.7.1.48	R00513	(1.00)Cytidine+(1.00)ATP<=>(1.00)ADP+(1.00)CMP	(1.00)cpd00367[c]+(1.00)cpd00002[c]<=>(1.00)cpd00008[c]+(1.00)cpd00046[c]		0	1000	1	0
rxn05318	no match		(1.00)H++(1.00)Adenosine<=>(1.00)H++(1.00)Adenosine	(1.00)cpd00067[e]+(1.00)cpd00182[e]<=>(1.00)cpd00067[c]+(1.00)cpd00182[c]		-1000	1000	1	0
rxn00100	2.7.1.24	R00130	(1.00)Dephospho-CoA+(1.00)ATP<=>(1.00)ADP+(1.00)CoA	(1.00)cpd00655[c]+(1.00)cpd00002[c]<=>(1.00)cpd00008[c]+(1.00)cpd00010[c]		0	1000	0	0
rxn08296	2.7.1.107		(1.00)ATP+(1.00)1,2-Diacyl-sn-glycerol_ditetradec-7-enoyl<=>(1.00)1,2-ditetradec-7-enoyl-sn-glycerol_3-phosphate+(1.00)ADP	(1.00)cpd00002[c]+(1.00)cpd15308[c]<=>(1.00)cpd15523[c]+(1.00)cpd00008[c]		0	1000	1	0
rxn10256	2.7.1.107		(1.00)1,2-Diisopentadecanoyl-sn-glycerol+(1.00)ATP<=>(1.00)ADP+(1.00)1,2-diisopentadecanoyl-sn-glycerol_3-phosphate	(1.00)cpd15704[c]+(1.00)cpd00002[c]<=>(1.00)cpd00008[c]+(1.00)cpd15680[c]		0	1000	1	0
rxn10474	no match		(1.00)Co2+<=>(1.00)Co2+	(1.00)cpd00149[c]<=>(1.00)cpd00149[e]		-1000	1000	1	0
rxn05404	2.3.1.0		(1.00)13-methyl-tetra-decanoyl-ACP+(1.00)H++(1.00)Malonyl-acyl-carrierprotein-<=>(1.00)15-methyl-3-oxo-hexa-decanoyl-ACP+(1.00)ACP+(1.00)CO2	(1.00)cpd11540[c]+(1.00)cpd00067[c]+(1.00)cpd11492[c]<=>(1.00)cpd11541[c]+(1.00)cpd11493[c]+(1.00)cpd00011[c]		0	1000	0	0
rxn01018	2.1.3.2	R01397	(1.00)L-Aspartate+(1.00)Carbamoylphosphate<=>(1.00)Phosphate+(1.00)N-Carbamoyl-L-aspartate+(2.00)H+	(1.00)cpd00041[c]+(1.00)cpd00146[c]<=>(1.00)cpd00009[c]+(1.00)cpd00343[c]+(2.00)cpd00067[c]		0	1000	0	0
rxn00060	2.5.1.61	R00084	(4.00)Porphobilinogen+(1.00)H2O<=>(4.00)NH3+(1.00)Hydroxymethylbilane	(4.00)cpd00689[c]+(1.00)cpd00001[c]<=>(4.00)cpd00013[c]+(1.00)cpd00755[c]		0	1000	0	0
rxn00806	2.6.1.42	R01090	(1.00)L-Leucine+(1.00)2-Oxoglutarate<=>(1.00)4MOP+(1.00)L-Glutamate	(1.00)cpd00107[c]+(1.00)cpd00024[c]<=>(1.00)cpd00200[c]+(1.00)cpd00023[c]		-1000	1000	1	0
rxn01000	4.2.1.51	R01373	(1.00)H++(1.00)Prephenate<=>(1.00)Phenylpyruvate+(1.00)H2O+(1.00)CO2	(1.00)cpd00067[c]+(1.00)cpd00219[c]<=>(1.00)cpd00143[c]+(1.00)cpd00001[c]+(1.00)cpd00011[c]		0	1000	0	0
rxn00006	1.11.1.6	R00009	(2.00)H2O2<=>(1.00)O2+(2.00)H2O	(2.00)cpd00025[c]<=>(1.00)cpd00007[c]+(2.00)cpd00001[c]		0	1000	0	0
rxn05462	4.2.1.0		(1.00)3-Hydroxyoctodecanoyl-ACP<=>(1.00)H2O+(1.00)trans-Octodec-2-enoyl-ACP	(1.00)cpd11571[c]<=>(1.00)cpd00001[c]+(1.00)cpd11572[c]		-1000	1000	1	0
rxn00675	6.2.1.1	R00926	(1.00)Propionyladenylate+(1.00)CoA<=>(1.00)Propionyl-CoA+(1.00)AMP	(1.00)cpd03560[c]+(1.00)cpd00010[c]<=>(1.00)cpd00086[c]+(1.00)cpd00018[c]		0	1000	0	0
rxn02834	3.6.1.31	R04035	(1.00)H2O+(1.00)Phosphoribosyl-ATP<=>(1.00)PPi+(1.00)Phosphoribosyl-AMP	(1.00)cpd00001[c]+(1.00)cpd01775[c]<=>(1.00)cpd00012[c]+(1.00)cpd01777[c]		0	1000	0	0
rxn00656	2.6.1.18	R00907	(1.00)3-Oxopropanoate+(1.00)L-Alanine<=>(1.00)Pyruvate+(1.00)beta-Alanine	(1.00)cpd00191[c]+(1.00)cpd00035[c]<=>(1.00)cpd00020[c]+(1.00)cpd00085[c]		-1000	1000	1	0
rxn10121	no match		(2.00)H++(1.00)Nitrate+(1.00)Menaquinol_8<=>(1.00)Nitrite+(2.00)H++(1.00)H2O+(1.00)Menaquinone_8	(2.00)cpd00067[c]+(1.00)cpd00209[c]+(1.00)cpd15499[c]<=>(1.00)cpd00075[c]+(2.00)cpd00067[e]+(1.00)cpd00001[c]+(1.00)cpd15500[c]		-1000	1000	1	0
rxn08550	2.3.1.15		(1.00)Glycerol-3-phosphate+(1.00)Hexadecenoyl-ACP<=>(1.00)1-hexadec-9-enoyl-sn-glycerol_3-phosphate+(1.00)ACP	(1.00)cpd00080[c]+(1.00)cpd15239[c]<=>(1.00)cpd15326[c]+(1.00)cpd11493[c]		0	1000	0	0
rxn05334	2.3.1.85|2.3.1.86|4.2.1.58|4.2.1.59|4.2.1.61	R04537	(1.00)(R)-3-Hydroxyoctanoyl-[acyl-carrier_protein]<=>(1.00)H2O+(1.00)(2E)-Octenoyl-[acp]	(1.00)cpd11483[c]<=>(1.00)cpd00001[c]+(1.00)cpd11471[c]		-1000	1000	1	0
rxn05394	4.2.1.0		(1.00)9-methyl-3-hydroxy-decanoyl-ACP<=>(1.00)9-methyl-trans-dec-2-enoyl-ACP+(1.00)H2O	(1.00)cpd11530[c]<=>(1.00)cpd11531[c]+(1.00)cpd00001[c]		-1000	1000	1	0
rxn02305	2.5.1.3	R03223	(1.00)H++(1.00)4-Methyl-5-2-phosphoethyl-thiazole+(1.00)4-Amino-2-methyl-5-diphosphomethylpyrimidine<=>(1.00)PPi+(1.00)Thiamine_phosphate	(1.00)cpd00067[c]+(1.00)cpd02654[c]+(1.00)cpd02894[c]<=>(1.00)cpd00012[c]+(1.00)cpd00793[c]		-1000	1000	1	0
rxn02341	4.1.1.36	R03269	(1.00)H++(1.00)(R)-4-Phosphopantothenoyl-L-cysteine<=>(1.00)CO2+(1.00)Phosphopantetheine	(1.00)cpd00067[c]+(1.00)cpd02666[c]<=>(1.00)cpd00011[c]+(1.00)cpd00834[c]		0	1000	0	0
rxn04050	1.3.1.54	R05812	(1.00)NADPH+(1.00)H++(1.00)Cobalt-precorrin_6<=>(1.00)Cobalt-precorrin_6B+(1.00)NADP	(1.00)cpd00005[c]+(1.00)cpd00067[c]+(1.00)cpd08372[c]<=>(1.00)cpd08373[c]+(1.00)cpd00006[c]		-1000	1000	1	0
rxn06022	3.1.4.14	R01623	(1.00)H2O+(1.00)ACP<=>(1.00)apo-ACP+(1.00)Phosphopantetheine	(1.00)cpd00001[c]+(1.00)cpd11493[c]<=>(1.00)cpd12370[c]+(1.00)cpd00834[c]		-1000	1000	1	0
rxn09310	no match		(1.00)1-deoxy-D-xylulose5-phosphate+(1.00)ATP+(1.00)L-Cysteine+(1.00)L-Tyrosine<=>(1.00)H2O+(1.00)L-Alanine+(1.00)PPi+(1.00)4-Methyl-5-2-phosphoethyl-thiazole+(1.00)4-Hydroxy-benzylalcohol+(1.00)CO2+(1.00)AMP	(1.00)cpd08289[c]+(1.00)cpd00002[c]+(1.00)cpd00084[c]+(1.00)cpd00069[c]<=>(1.00)cpd00001[c]+(1.00)cpd00035[c]+(1.00)cpd00012[c]+(1.00)cpd02654[c]+(1.00)cpd15378[c]+(1.00)cpd00011[c]+(1.00)cpd00018[c]		0	1000	0	0
rxn03175	5.3.1.16	R04640	(1.00)phosphoribosylformiminoaicar-phosphate<=>(1.00)phosphoribulosylformimino-AICAR-phosphate	(1.00)cpd02979[c]<=>(1.00)cpd02991[c]		-1000	1000	1	0
rxn01275	2.7.1.12	R01737	(1.00)ATP+(1.00)GLCN<=>(1.00)6-Phospho-D-gluconate+(1.00)ADP	(1.00)cpd00002[c]+(1.00)cpd00222[c]<=>(1.00)cpd00284[c]+(1.00)cpd00008[c]		0	1000	1	0
rxn01643	1.2.1.11	R02291	(1.00)Phosphate+(1.00)L-Aspartate4-semialdehyde+(1.00)NADP<=>(1.00)NADPH+(1.00)4-Phospho-L-aspartate	(1.00)cpd00009[c]+(1.00)cpd00346[c]+(1.00)cpd00006[c]<=>(1.00)cpd00005[c]+(1.00)cpd01977[c]		-1000	0	0	0
rxn10257	2.7.1.107		(1.00)1,2-Dianteisopentadecanoyl-sn-glycerol+(1.00)ATP<=>(1.00)1,2-dianteisopentadecanoyl-sn-glycerol_3-phosphate+(1.00)ADP	(1.00)cpd15705[c]+(1.00)cpd00002[c]<=>(1.00)cpd15681[c]+(1.00)cpd00008[c]		0	1000	1	0
rxn02473	4.2.1.19	R03457	(1.00)D-erythro-imidazol-glycerol-phosphate<=>(1.00)H2O+(1.00)imidazole_acetol-phosphate	(1.00)cpd02843[c]<=>(1.00)cpd00001[c]+(1.00)cpd00930[c]		0	1000	0	0
rxn03384	4.1.1.37	R04972	(4.00)H++(1.00)UroporphyrinogenI<=>(4.00)CO2+(1.00)CoproporphyrinogenI	(4.00)cpd00067[c]+(1.00)cpd03414[c]<=>(4.00)cpd00011[c]+(1.00)cpd03416[c]		-1000	1000	1	0
rxn08128	no match		(1.00)Maltose+(1.00)Maltopentaose<=>(1.00)Maltohexaose+(1.00)D-Glucose	(1.00)cpd00179[c]+(1.00)cpd15495[c]<=>(1.00)cpd01329[c]+(1.00)cpd00027[c]		-1000	1000	1	0
rxn05293	no match		(1.00)2-C-methyl-D-erythritol2-4-cyclodiphosphate+(1.00)H++(1.00)NADH<=>(1.00)H2O+(1.00)1-Hydroxy-2-methyl-2-butenyl_4-diphosphate+(1.00)NAD	(1.00)cpd08301[c]+(1.00)cpd00067[c]+(1.00)cpd00004[c]<=>(1.00)cpd00001[c]+(1.00)cpd08615[c]+(1.00)cpd00003[c]		0	1000	0	0
rxn00834	1.1.1.205	R01130	(1.00)H2O+(1.00)IMP+(1.00)NAD<=>(1.00)H++(1.00)XMP+(1.00)NADH	(1.00)cpd00001[c]+(1.00)cpd00114[c]+(1.00)cpd00003[c]<=>(1.00)cpd00067[c]+(1.00)cpd00497[c]+(1.00)cpd00004[c]		-1000	1000	1	0
rxn12639	no match		(1.00)Ala-Gln+(1.00)H2O<=>(1.00)L-Glutamine+(1.00)L-Alanine	(1.00)cpd11587[c]+(1.00)cpd00001[c]<=>(1.00)cpd00053[c]+(1.00)cpd00035[c]		-1000	1000	1	0
rxn08978	1.6.99.6		(1.00)NADPH+(1.00)H++(1.00)Menaquinone_8<=>(1.00)Menaquinol_8+(1.00)NADP	(1.00)cpd00005[c]+(1.00)cpd00067[c]+(1.00)cpd15500[c]<=>(1.00)cpd15499[c]+(1.00)cpd00006[c]		0	1000	0	0
rxn10219	2.3.1.51		(1.00)fa6coa+(1.00)1-isohexadecanoyl-sn-glycerol_3-phosphate<=>(1.00)CoA+(1.00)1,2-diisohexadecanoyl-sn-glycerol_3-phosphate	(1.00)cpd11441[c]+(1.00)cpd15676[c]<=>(1.00)cpd00010[c]+(1.00)cpd15682[c]		0	1000	0	0
rxn00786	no match	R01068	(1.00)D-fructose-1,6-bisphosphate<=>(1.00)Glycerone-phosphate+(1.00)Glyceraldehyde3-phosphate	(1.00)cpd00290[c]<=>(1.00)cpd00095[c]+(1.00)cpd00102[c]		-1000	1000	1	0
rxn05533	3.A.1.5|3.|.1.5		(1.00)ala-L-asp-L+(1.00)H2O+(1.00)ATP<=>(1.00)Phosphate+(1.00)H++(1.00)ala-L-asp-L+(1.00)ADP	(1.00)cpd11593[e]+(1.00)cpd00001[c]+(1.00)cpd00002[c]<=>(1.00)cpd00009[c]+(1.00)cpd00067[c]+(1.00)cpd11593[c]+(1.00)cpd00008[c]		0	1000	0	0
rxn03080	2.5.1.78	R04457	(1.00)4-1-D-Ribitylamino-5-aminouracil+(1.00)3-4-dihydroxy-2-butanone4-phosphate<=>(1.00)Phosphate+(1.00)H++(1.00)6-7-Dimethyl-8-1-D-ribityllumazine+(2.00)H2O	(1.00)cpd02882[c]+(1.00)cpd11225[c]<=>(1.00)cpd00009[c]+(1.00)cpd00067[c]+(1.00)cpd02656[c]+(2.00)cpd00001[c]		-1000	1000	1	0
rxn05150	3.A.1.15|3.|.1.15		(1.00)Zn2++(1.00)H2O+(1.00)ATP<=>(1.00)Phosphate+(1.00)H++(1.00)Zn2++(1.00)ADP	(1.00)cpd00034[e]+(1.00)cpd00001[c]+(1.00)cpd00002[c]<=>(1.00)cpd00009[c]+(1.00)cpd00067[c]+(1.00)cpd00034[c]+(1.00)cpd00008[c]		0	1000	0	0
rxn01653	6.3.3.2	R02301	(1.00)5-Formyltetrahydrofolate+(1.00)ATP<=>(1.00)Phosphate+(1.00)ADP+(1.00)5-10-Methenyltetrahydrofolate	(1.00)cpd02197[c]+(1.00)cpd00002[c]<=>(1.00)cpd00009[c]+(1.00)cpd00008[c]+(1.00)cpd00347[c]		0	1000	0	0
rxn05199	no match		(1.00)H++(1.00)Uridine<=>(1.00)H++(1.00)Uridine	(1.00)cpd00067[e]+(1.00)cpd00249[e]<=>(1.00)cpd00067[c]+(1.00)cpd00249[c]		-1000	1000	1	0
rxn02297	2.3.1.47	R03210	(1.00)Pimeloyl-CoA+(1.00)H++(1.00)L-Alanine<=>(1.00)8-Amino-7-oxononanoate+(1.00)CO2+(1.00)CoA	(1.00)cpd00782[c]+(1.00)cpd00067[c]+(1.00)cpd00035[c]<=>(1.00)cpd00800[c]+(1.00)cpd00011[c]+(1.00)cpd00010[c]		0	1000	0	0
rxn08656	no match		(1.00)Glycolate+(1.00)Menaquinone_8<=>(1.00)Glyoxalate+(1.00)Menaquinol_8	(1.00)cpd00139[c]+(1.00)cpd15500[c]<=>(1.00)cpd00040[c]+(1.00)cpd15499[c]		0	1000	0	0
rxn01362	2.4.2.10	R01870	(1.00)PPi+(1.00)Orotidylic_acid<=>(1.00)Orotate+(1.00)PRPP	(1.00)cpd00012[c]+(1.00)cpd00810[c]<=>(1.00)cpd00247[c]+(1.00)cpd00103[c]		-1000	0	0	0
rxn10211	2.3.1.51		(1.00)Palmitoyl-CoA+(1.00)1-hexadecanoyl-sn-glycerol_3-phosphate<=>(1.00)1,2-dihexadecanoyl-sn-glycerol_3-phosphate+(1.00)CoA	(1.00)cpd00134[c]+(1.00)cpd15327[c]<=>(1.00)cpd15524[c]+(1.00)cpd00010[c]		0	1000	0	0
rxn05063	4.2.1.104	R07315	(1.00)Cyanate+(1.00)H2O<=>(1.00)Carbamate	(1.00)cpd01015[c]+(1.00)cpd00001[c]<=>(1.00)cpd01101[c]		0	1000	0	0
rxn00227	3.6.1.7	R00317	(1.00)Acetylphosphate+(1.00)H2O<=>(1.00)Phosphate+(1.00)Acetate+(2.00)H+	(1.00)cpd00196[c]+(1.00)cpd00001[c]<=>(1.00)cpd00009[c]+(1.00)cpd00029[c]+(2.00)cpd00067[c]		0	1000	0	0
rxn01637	2.6.1.11	R02283	(1.00)2-Oxoglutarate+(1.00)N-Acetylornithine<=>(1.00)L-Glutamate+(1.00)2-Acetamido-5-oxopentanoate	(1.00)cpd00024[c]+(1.00)cpd00342[c]<=>(1.00)cpd00023[c]+(1.00)cpd00918[c]		-1000	1000	1	0
rxn05040	4.1.99.12	R07281	(1.00)D-Ribulose5-phosphate<=>(1.00)H++(1.00)3-4-dihydroxy-2-butanone4-phosphate+(1.00)Formate	(1.00)cpd00171[c]<=>(1.00)cpd00067[c]+(1.00)cpd11225[c]+(1.00)cpd00047[c]		0	1000	0	0
rxn02929	1.3.1.26	R04199	(1.00)tetrahydrodipicolinate+(1.00)NADP<=>(1.00)NADPH+(1.00)H++(1.00)Dihydrodipicolinate	(1.00)cpd02465[c]+(1.00)cpd00006[c]<=>(1.00)cpd00005[c]+(1.00)cpd00067[c]+(1.00)cpd02120[c]		-1000	1000	1	0
rxn00379	2.7.7.4	R00529	(1.00)H++(1.00)Sulfate+(1.00)ATP<=>(1.00)APS+(1.00)PPi	(1.00)cpd00067[c]+(1.00)cpd00048[c]+(1.00)cpd00002[c]<=>(1.00)cpd00193[c]+(1.00)cpd00012[c]		0	1000	1	0
rxn12641	no match		(1.00)H2O+(1.00)L-alanylglycine<=>(1.00)Glycine+(1.00)L-Alanine	(1.00)cpd00001[c]+(1.00)cpd11585[c]<=>(1.00)cpd00033[c]+(1.00)cpd00035[c]		-1000	1000	1	0
rxn10315	no match		(24.00)UDP-N-acetylglucosamine+(1.00)Isohexadecanoyllipoteichoic_acid (n=24), linked, unsubstituted<=>(1.00)Isohexadecanoyllipoteichoic_acid (n=24), linked, N-acetyl-D-glucosamine+(24.00)UDP	(24.00)cpd00037[c]+(1.00)cpd15754[c]<=>(1.00)cpd15772[c]+(24.00)cpd00014[c]		-1000	1000	1	0
rxn05450	1.3.1.0		(1.00)14-methyl-trans-pentadec-2-enoyl-ACP+(1.00)H++(1.00)NADH<=>(1.00)14-methyl-pentadecanoyl-ACP+(1.00)NAD	(1.00)cpd11568[c]+(1.00)cpd00067[c]+(1.00)cpd00004[c]<=>(1.00)cpd11569[c]+(1.00)cpd00003[c]		0	1000	0	0
rxn06493	1.8.1.4	R03815	(1.00)Dihydrolipolprotein+(1.00)NAD<=>(1.00)H++(1.00)Lipoylprotein+(1.00)NADH	(1.00)cpd12225[c]+(1.00)cpd00003[c]<=>(1.00)cpd00067[c]+(1.00)cpd12005[c]+(1.00)cpd00004[c]		-1000	1000	1	0
rxn00350	2.3.2.2|3.4.11.4	R00494	(1.00)GSH+(1.00)H2O<=>(1.00)Cys-Gly+(1.00)L-Glutamate	(1.00)cpd00042[c]+(1.00)cpd00001[c]<=>(1.00)cpd01017[c]+(1.00)cpd00023[c]		-1000	1000	1	0
rxn10205	2.3.1.15		(1.00)fa11coa+(1.00)Glycerol-3-phosphate<=>(1.00)CoA+(1.00)1-isoheptadecanoyl-sn-glycerol_3-phosphate	(1.00)cpd11432[c]+(1.00)cpd00080[c]<=>(1.00)cpd00010[c]+(1.00)cpd15671[c]		0	1000	0	0
rxn02402	2.4.2.19	R03348	(1.00)PPi+(1.00)Nicotinate_ribonucleotide+(1.00)CO2<=>(1.00)PRPP+(2.00)H++(1.00)Quinolinate	(1.00)cpd00012[c]+(1.00)cpd00873[c]+(1.00)cpd00011[c]<=>(1.00)cpd00103[c]+(2.00)cpd00067[c]+(1.00)cpd02333[c]		-1000	0	0	0
rxn00239	2.7.4.8	R00332	(1.00)GMP+(1.00)ATP<=>(1.00)ADP+(1.00)GDP	(1.00)cpd00126[c]+(1.00)cpd00002[c]<=>(1.00)cpd00008[c]+(1.00)cpd00031[c]		0	1000	1	0
rxn00612	no match	R05680	(1.00)Glycerol-3-phosphate+(1.00)NADP<=>(1.00)NADPH+(1.00)H++(1.00)Glycerone-phosphate	(1.00)cpd00080[c]+(1.00)cpd00006[c]<=>(1.00)cpd00005[c]+(1.00)cpd00067[c]+(1.00)cpd00095[c]		-1000	1000	1	0
rxn05326	1.3.1.9	R04955	(1.00)Hexanoyl-ACP+(1.00)NAD<=>(1.00)H++(1.00)NADH+(1.00)(2E)-Hexenoyl-[acp]	(1.00)cpd11472[c]+(1.00)cpd00003[c]<=>(1.00)cpd00067[c]+(1.00)cpd00004[c]+(1.00)cpd11473[c]		-1000	0	0	0
rxn03243	2.3.1.16	R04742	(1.00)Decanoyl-CoA+(1.00)Acetyl-CoA<=>(1.00)CoA+(1.00)3-Oxododecanoyl-CoA	(1.00)cpd03128[c]+(1.00)cpd00022[c]<=>(1.00)cpd00010[c]+(1.00)cpd03117[c]		-1000	1000	1	0
rxn05418	1.1.1.0		(1.00)NADPH+(1.00)H++(1.00)8-methyl-3-oxo-nonanoyl-ACP<=>(1.00)8-methyl-3-hydroxy-nonanoyl-ACP+(1.00)NADP	(1.00)cpd00005[c]+(1.00)cpd00067[c]+(1.00)cpd11554[c]<=>(1.00)cpd11555[c]+(1.00)cpd00006[c]		-1000	1000	1	0
rxn09562	2.7.4.8		(1.00)GMP+(1.00)dATP<=>(1.00)dADP+(1.00)GDP	(1.00)cpd00126[c]+(1.00)cpd00115[c]<=>(1.00)cpd00177[c]+(1.00)cpd00031[c]		-1000	1000	1	0
rxn03974	1.5.1.29	R05705	(1.00)FMNH2+(1.00)NAD<=>(1.00)FMN+(1.00)H++(1.00)NADH	(1.00)cpd01270[c]+(1.00)cpd00003[c]<=>(1.00)cpd00050[c]+(1.00)cpd00067[c]+(1.00)cpd00004[c]		-1000	0	0	0
rxn00711	2.4.2.9	R00966	(1.00)UMP+(1.00)PPi<=>(1.00)PRPP+(1.00)Uracil	(1.00)cpd00091[c]+(1.00)cpd00012[c]<=>(1.00)cpd00103[c]+(1.00)cpd00092[c]		-1000	0	0	0
rxn05375	2.3.1.0		(1.00)10-methyl-dodecanoyl-ACP+(1.00)H++(1.00)Malonyl-acyl-carrierprotein-<=>(1.00)ACP+(1.00)CO2+(1.00)12-methyl-3-oxo-tetra-decanoyl-ACP	(1.00)cpd11511[c]+(1.00)cpd00067[c]+(1.00)cpd11492[c]<=>(1.00)cpd11493[c]+(1.00)cpd00011[c]+(1.00)cpd11512[c]		0	1000	0	0
rxn00689	6.3.2.17	R00942	(1.00)Tetrahydrofolate+(1.00)ATP+(1.00)L-Glutamate<=>(1.00)Phosphate+(1.00)THF-L-glutamate+(1.00)H++(1.00)ADP	(1.00)cpd00087[c]+(1.00)cpd00002[c]+(1.00)cpd00023[c]<=>(1.00)cpd00009[c]+(1.00)cpd06227[c]+(1.00)cpd00067[c]+(1.00)cpd00008[c]		0	1000	0	0
rxn10309	no match		(1.00)Stearoyllipoteichoic_acid (n=24), linked, unsubstituted+(24.00)UDP-N-acetylglucosamine<=>(24.00)UDP+(1.00)Stearoyllipoteichoic_acid (n=24), linked, N-acetyl-D-glucosamine	(1.00)cpd15748[c]+(24.00)cpd00037[c]<=>(24.00)cpd00014[c]+(1.00)cpd15766[c]		-1000	1000	1	0
rxn10224	2.7.7.41		(1.00)1,2-dianteisopentadecanoyl-sn-glycerol_3-phosphate+(1.00)CTP<=>(1.00)CDP-1,2-dianteisopentadecanoylglycerol+(1.00)PPi	(1.00)cpd15681[c]+(1.00)cpd00052[c]<=>(1.00)cpd15687[c]+(1.00)cpd00012[c]		-1000	1000	1	0
rxn04113	1.17.1.2	R05884	(1.00)NADPH+(1.00)H++(1.00)1-Hydroxy-2-methyl-2-butenyl_4-diphosphate<=>(1.00)Isopentenyldiphosphate+(1.00)H2O+(1.00)NADP	(1.00)cpd00005[c]+(1.00)cpd00067[c]+(1.00)cpd08615[c]<=>(1.00)cpd00113[c]+(1.00)cpd00001[c]+(1.00)cpd00006[c]		0	1000	0	0
rxn12633	no match		(1.00)ala-L-asp-L+(1.00)H2O<=>(1.00)L-Aspartate+(1.00)L-Alanine	(1.00)cpd11593[c]+(1.00)cpd00001[c]<=>(1.00)cpd00041[c]+(1.00)cpd00035[c]		-1000	1000	1	0
rxn05250	6.2.1.3		(1.00)fa6+(1.00)H++(1.00)ATP+(1.00)CoA<=>(1.00)fa6coa+(1.00)PPi+(1.00)AMP	(1.00)cpd11440[c]+(1.00)cpd00067[c]+(1.00)cpd00002[c]+(1.00)cpd00010[c]<=>(1.00)cpd11441[c]+(1.00)cpd00012[c]+(1.00)cpd00018[c]		0	1000	0	0
rxn00351	6.3.2.3	R00497	(1.00)Glycine+(1.00)ATP+(1.00)gamma-Glutamylcysteine<=>(1.00)Phosphate+(1.00)GSH+(1.00)H++(1.00)ADP	(1.00)cpd00033[c]+(1.00)cpd00002[c]+(1.00)cpd00506[c]<=>(1.00)cpd00009[c]+(1.00)cpd00042[c]+(1.00)cpd00067[c]+(1.00)cpd00008[c]		0	1000	0	0
rxn00799	4.2.1.2	R01082	(1.00)L-Malate<=>(1.00)H2O+(1.00)Fumarate	(1.00)cpd00130[c]<=>(1.00)cpd00001[c]+(1.00)cpd00106[c]		-1000	1000	1	0
rxn00313	4.1.1.20	R00451	(1.00)H++(1.00)meso-2,6-Diaminopimelate<=>(1.00)L-Lysine+(1.00)CO2	(1.00)cpd00067[c]+(1.00)cpd00516[c]<=>(1.00)cpd00039[c]+(1.00)cpd00011[c]		0	1000	0	0
rxn02791	2.3.2.2	R03970	(1.00)L-3-Cyanoalanine+(1.00)L-Glutamate<=>(1.00)gamma-Glutamyl-beta-cyanoalanine+(1.00)H2O	(1.00)cpd01651[c]+(1.00)cpd00023[c]<=>(1.00)cpd03407[c]+(1.00)cpd00001[c]		-1000	1000	1	0
rxn06023	2.7.8.-|2.7.8.7	R01625	(1.00)apo-ACP+(1.00)CoA<=>(1.00)Adenosine_3-5-bisphosphate+(1.00)ACP	(1.00)cpd12370[c]+(1.00)cpd00010[c]<=>(1.00)cpd00045[c]+(1.00)cpd11493[c]		-1000	1000	1	0
rxn10206	2.3.1.15		(1.00)Glycerol-3-phosphate+(1.00)fa12coa<=>(1.00)1-anteisoheptadecanoyl-sn-glycerol_3-phosphate+(1.00)CoA	(1.00)cpd00080[c]+(1.00)cpd11434[c]<=>(1.00)cpd15672[c]+(1.00)cpd00010[c]		0	1000	0	0
rxn12640	no match		(1.00)ala-L-glu-L+(1.00)H2O<=>(1.00)L-Alanine+(1.00)L-Glutamate	(1.00)cpd11586[c]+(1.00)cpd00001[c]<=>(1.00)cpd00035[c]+(1.00)cpd00023[c]		-1000	1000	1	0
rxn05024	4.1.3.36	R07263	(1.00)H++(1.00)Succinylbenzoyl-CoA<=>(1.00)1,4-Dihydroxy-2-naphthoyl-CoA+(1.00)H2O	(1.00)cpd00067[c]+(1.00)cpd02021[c]<=>(1.00)cpd11217[c]+(1.00)cpd00001[c]		0	1000	0	0
rxn02811	4.2.1.33	R04001	(1.00)3-Isopropylmalate<=>(1.00)H2O+(1.00)2-Isopropylmaleate	(1.00)cpd02693[c]<=>(1.00)cpd00001[c]+(1.00)cpd01710[c]		-1000	1000	1	0
rxn05342	1.1.1.100|2.3.1.85|2.3.1.86	R04566	(1.00)HMA+(1.00)NADP<=>(1.00)NADPH+(1.00)H++(1.00)3-oxotetradecanoyl-acp	(1.00)cpd11484[c]+(1.00)cpd00006[c]<=>(1.00)cpd00005[c]+(1.00)cpd00067[c]+(1.00)cpd11491[c]		-1000	1000	1	0
rxn05376	1.1.1.0		(1.00)NADPH+(1.00)H++(1.00)12-methyl-3-oxo-tetra-decanoyl-ACP<=>(1.00)12-methyl-3-hydroxy-tetra-decanoyl-ACP+(1.00)NADP	(1.00)cpd00005[c]+(1.00)cpd00067[c]+(1.00)cpd11512[c]<=>(1.00)cpd11513[c]+(1.00)cpd00006[c]		-1000	1000	1	0
rxn05455	2.3.1.0		(1.00)12-methyl-tridecanoyl-ACP+(1.00)CoA<=>(1.00)fa1coa+(1.00)ACP	(1.00)cpd11565[c]+(1.00)cpd00010[c]<=>(1.00)cpd11435[c]+(1.00)cpd11493[c]		-1000	1000	1	0
rxn00333	1.1.3.15	R00475	(1.00)Glycolate+(1.00)O2<=>(1.00)Glyoxalate+(1.00)H2O2	(1.00)cpd00139[c]+(1.00)cpd00007[c]<=>(1.00)cpd00040[c]+(1.00)cpd00025[c]		0	1000	0	0
rxn10262	2.7.8.5		(1.00)CDP-1,2-diisopentadecanoylglycerol+(1.00)Glycerol-3-phosphate<=>(1.00)Diisopentadecanoylphosphatidylglycerophosphate+(1.00)CMP	(1.00)cpd15686[c]+(1.00)cpd00080[c]<=>(1.00)cpd15719[c]+(1.00)cpd00046[c]		-1000	1000	1	0
rxn00086	1.8.1.7	R00115	(2.00)GSH+(1.00)NADP<=>(1.00)NADPH+(1.00)H++(1.00)Oxidized_glutathione	(2.00)cpd00042[c]+(1.00)cpd00006[c]<=>(1.00)cpd00005[c]+(1.00)cpd00067[c]+(1.00)cpd00111[c]		-1000	1000	1	0
rxn04673	2.5.1.-	R06858	(1.00)1-4-Dihydroxy-2-naphthoate+(1.00)Phytyl_diphosphate<=>(1.00)H++(1.00)PPi+(1.00)CO2+(1.00)Demethylphylloquinone	(1.00)cpd02295[c]+(1.00)cpd03214[c]<=>(1.00)cpd00067[c]+(1.00)cpd00012[c]+(1.00)cpd00011[c]+(1.00)cpd09410[c]		0	1000	0	0
rxn01286	1.2.1.3	R01752	(1.00)H2O+(1.00)D-Glyceraldehyde+(1.00)NAD<=>(2.00)H++(1.00)NADH+(1.00)Glycerate	(1.00)cpd00001[c]+(1.00)cpd00448[c]+(1.00)cpd00003[c]<=>(2.00)cpd00067[c]+(1.00)cpd00004[c]+(1.00)cpd00223[c]		0	1000	0	0
rxn06510	2.3.1.16	R03858	(1.00)Acetyl-CoA+(1.00)Lauroyl-CoA<=>(1.00)3-Oxotetradecanoyl-CoA+(1.00)CoA	(1.00)cpd00022[c]+(1.00)cpd01260[c]<=>(1.00)cpd12689[c]+(1.00)cpd00010[c]		-1000	1000	1	0
rxn00199	1.1.1.42	R00268	(1.00)Oxalosuccinate+(1.00)H+<=>(1.00)2-Oxoglutarate+(1.00)CO2	(1.00)cpd03187[c]+(1.00)cpd00067[c]<=>(1.00)cpd00024[c]+(1.00)cpd00011[c]		0	1000	0	0
rxn01187	4.1.2.9	R01621	(1.00)Phosphate+(1.00)D-Xylulose5-phosphate+(1.00)H+<=>(1.00)Acetylphosphate+(1.00)H2O+(1.00)Glyceraldehyde3-phosphate	(1.00)cpd00009[c]+(1.00)cpd00198[c]+(1.00)cpd00067[c]<=>(1.00)cpd00196[c]+(1.00)cpd00001[c]+(1.00)cpd00102[c]		0	1000	0	0
rxn05596	2.A.37|2.|.37		(1.00)H++(1.00)K+<=>(1.00)H++(1.00)K+	(1.00)cpd00067[e]+(1.00)cpd00205[c]<=>(1.00)cpd00067[c]+(1.00)cpd00205[e]		0	1000	1	0
rxn01489	2.5.1.32	R02065	(2.00)Geranylgeranyl_diphosphate<=>(1.00)Prephytoene_diphosphate+(1.00)PPi	(2.00)cpd00289[c]<=>(1.00)cpd02168[c]+(1.00)cpd00012[c]		0	1000	0	0
rxn01019	2.1.3.3	R01398	(1.00)Carbamoylphosphate+(1.00)Ornithine<=>(1.00)Phosphate+(2.00)H++(1.00)Citrulline	(1.00)cpd00146[c]+(1.00)cpd00064[c]<=>(1.00)cpd00009[c]+(2.00)cpd00067[c]+(1.00)cpd00274[c]		0	1000	0	0
rxn00412	6.3.4.2	R00573	(1.00)L-Glutamine+(1.00)H2O+(1.00)ATP+(1.00)UTP<=>(1.00)Phosphate+(2.00)H++(1.00)CTP+(1.00)ADP+(1.00)L-Glutamate	(1.00)cpd00053[c]+(1.00)cpd00001[c]+(1.00)cpd00002[c]+(1.00)cpd00062[c]<=>(1.00)cpd00009[c]+(2.00)cpd00067[c]+(1.00)cpd00052[c]+(1.00)cpd00008[c]+(1.00)cpd00023[c]		0	1000	0	0
rxn11268	no match		(1.00)H++(1.00)PPi<=>(1.00)H++(1.00)PPi	(1.00)cpd00067[e]+(1.00)cpd00012[e]<=>(1.00)cpd00067[c]+(1.00)cpd00012[c]		-1000	0	0	0
rxn05457	2.3.1.1		(1.00)Myristoyl-ACP+(1.00)CoA<=>(1.00)ACP+(1.00)Myristoyl-CoA	(1.00)cpd11466[c]+(1.00)cpd00010[c]<=>(1.00)cpd11493[c]+(1.00)cpd01695[c]		-1000	1000	1	0
rxn03174	3.5.4.16	R04639	(1.00)7,8-Dihydroneopterin_3-triphosphate+(1.00)H2O<=>(1.00)2,5-Diamino-6-(5-triphosphoryl-3,4-trihydroxy-2-oxopentyl)-_amino-4-oxopyrimidine	(1.00)cpd02978[c]+(1.00)cpd00001[c]<=>(1.00)cpd03666[c]		-1000	0	0	0
rxn00146	1.1.2.4|1.1.2.5	R00198	(1.00)D-Lactate+(2.00)Cytochrome_c3+<=>(2.00)Cytochrome_c2++(2.00)H++(1.00)Pyruvate	(1.00)cpd00221[c]+(2.00)cpd00109[c]<=>(2.00)cpd00110[c]+(2.00)cpd00067[c]+(1.00)cpd00020[c]		-1000	1000	1	0
rxn10094	no match		(1.00)2-Demethylmenaquinone_8+(1.00)S-Adenosyl-L-methionine<=>(1.00)H++(1.00)Menaquinone_8+(1.00)S-Adenosyl-homocysteine	(1.00)cpd15352[c]+(1.00)cpd00017[c]<=>(1.00)cpd00067[c]+(1.00)cpd15500[c]+(1.00)cpd00019[c]		0	1000	0	0
rxn08310	2.7.7.41		(1.00)CTP+(1.00)1,2-dihexadec-9-enoyl-sn-glycerol_3-phosphate<=>(1.00)CDP-1,2-dihexadec-9-enoylglycerol+(1.00)PPi	(1.00)cpd00052[c]+(1.00)cpd15525[c]<=>(1.00)cpd15418[c]+(1.00)cpd00012[c]		-1000	1000	1	0
rxn05344	2.3.1.41	R04968	(1.00)Myristoyl-ACP+(1.00)H++(1.00)Malonyl-acyl-carrierprotein-<=>(1.00)3-oxohexadecanoyl-acp+(1.00)ACP+(1.00)CO2	(1.00)cpd11466[c]+(1.00)cpd00067[c]+(1.00)cpd11492[c]<=>(1.00)cpd11485[c]+(1.00)cpd11493[c]+(1.00)cpd00011[c]		0	1000	0	0
rxn00676	2.3.1.16	R00927	(1.00)Propionyl-CoA+(1.00)Acetyl-CoA<=>(1.00)CoA+(1.00)2-Methylacetoacetyl-CoA	(1.00)cpd00086[c]+(1.00)cpd00022[c]<=>(1.00)cpd00010[c]+(1.00)cpd02124[c]		-1000	1000	1	0
rxn03135	2.4.2.-	R04558	(1.00)AICAR+(1.00)H++(1.00)D-erythro-imidazol-glycerol-phosphate+(1.00)L-Glutamate<=>(1.00)L-Glutamine+(1.00)phosphoribulosylformimino-AICAR-phosphate	(1.00)cpd02851[c]+(1.00)cpd00067[c]+(1.00)cpd02843[c]+(1.00)cpd00023[c]<=>(1.00)cpd00053[c]+(1.00)cpd02991[c]		-1000	0	0	0
rxn05733	4.2.99.8|2.5.1.47|2.5.1.49	R04859	(1.00)O-Acetyl-L-serine+(1.00)trdrd+(1.00)H2S2O3<=>(1.00)Acetate+(1.00)trdox+(1.00)Sulfite+(1.00)L-Cysteine	(1.00)cpd00722[c]+(1.00)cpd11421[c]+(1.00)cpd00268[c]<=>(1.00)cpd00029[c]+(1.00)cpd11420[c]+(1.00)cpd00081[c]+(1.00)cpd00084[c]		0	1000	0	0
rxn12512	6.3.2.5	R04230	(1.00)4-phosphopantothenate+(1.00)ATP+(1.00)L-Cysteine<=>(1.00)PPi+(1.00)AMP+(1.00)(R)-4-Phosphopantothenoyl-L-cysteine	(1.00)cpd02201[c]+(1.00)cpd00002[c]+(1.00)cpd00084[c]<=>(1.00)cpd00012[c]+(1.00)cpd00018[c]+(1.00)cpd02666[c]		0	1000	0	0
rxn05350	2.3.1.41	R04957	(1.00)H++(1.00)Malonyl-acyl-carrierprotein-+(1.00)Hexanoyl-ACP<=>(1.00)3-oxooctanoyl-acp+(1.00)ACP+(1.00)CO2	(1.00)cpd00067[c]+(1.00)cpd11492[c]+(1.00)cpd11472[c]<=>(1.00)cpd11490[c]+(1.00)cpd11493[c]+(1.00)cpd00011[c]		0	1000	0	0
rxn00763	1.1.1.21|1.1.1.72	R01036	(1.00)Glycerol+(1.00)NAD<=>(1.00)H++(1.00)NADH+(1.00)D-Glyceraldehyde	(1.00)cpd00100[c]+(1.00)cpd00003[c]<=>(1.00)cpd00067[c]+(1.00)cpd00004[c]+(1.00)cpd00448[c]		-1000	1000	1	0
rxn09272	1.3.99.1		(1.00)Ubiquinone-8+(1.00)Succinate<=>(1.00)Fumarate+(1.00)Ubiquinol-8	(1.00)cpd15560[c]+(1.00)cpd00036[c]<=>(1.00)cpd00106[c]+(1.00)cpd15561[c]		0	0	1	0
rxn00138	6.3.1.5|6.3.5.1	R00189	(1.00)NH3+(1.00)Deamido-NAD+(1.00)ATP<=>(1.00)PPi+(1.00)AMP+(1.00)NAD	(1.00)cpd00013[c]+(1.00)cpd00638[c]+(1.00)cpd00002[c]<=>(1.00)cpd00012[c]+(1.00)cpd00018[c]+(1.00)cpd00003[c]		0	1000	0	0
rxn10174	no match		(1.00)H2O+(1.00)Maltohexaose+(1.00)ATP<=>(1.00)Phosphate+(1.00)H++(1.00)Maltohexaose+(1.00)ADP	(1.00)cpd00001[c]+(1.00)cpd01329[e]+(1.00)cpd00002[c]<=>(1.00)cpd00009[c]+(1.00)cpd00067[c]+(1.00)cpd01329[c]+(1.00)cpd00008[c]		0	1000	0	0
rxn05393	1.1.1.0		(1.00)NADPH+(1.00)H++(1.00)9-methyl-3-oxo-decanoyl-ACP<=>(1.00)9-methyl-3-hydroxy-decanoyl-ACP+(1.00)NADP	(1.00)cpd00005[c]+(1.00)cpd00067[c]+(1.00)cpd11529[c]<=>(1.00)cpd11530[c]+(1.00)cpd00006[c]		-1000	1000	1	0
rxn00686	1.5.1.3	R00939	(1.00)Tetrahydrofolate+(1.00)NADP<=>(1.00)NADPH+(1.00)H++(1.00)Dihydrofolate	(1.00)cpd00087[c]+(1.00)cpd00006[c]<=>(1.00)cpd00005[c]+(1.00)cpd00067[c]+(1.00)cpd00330[c]		-1000	1000	1	0
rxn00301	3.6.1.19	R00426	(1.00)H2O+(1.00)GTP<=>(1.00)GMP+(1.00)PPi	(1.00)cpd00001[c]+(1.00)cpd00038[c]<=>(1.00)cpd00126[c]+(1.00)cpd00012[c]		0	1000	0	0
rxn00262	1.4.3.16	R00357	(1.00)L-Aspartate+(1.00)O2+(1.00)H2O<=>(1.00)NH3+(1.00)Oxaloacetate+(1.00)H2O2	(1.00)cpd00041[c]+(1.00)cpd00007[c]+(1.00)cpd00001[c]<=>(1.00)cpd00013[c]+(1.00)cpd00032[c]+(1.00)cpd00025[c]		0	1000	0	0
rxn10255	2.7.1.107		(1.00)1,2-Diisotetradecanoyl-sn-glycerol+(1.00)ATP<=>(1.00)1,2-diisotetradecanoyl-sn-glycerol_3-phosphate+(1.00)ADP	(1.00)cpd15703[c]+(1.00)cpd00002[c]<=>(1.00)cpd15679[c]+(1.00)cpd00008[c]		0	1000	1	0
rxn00791	2.4.2.18	R01073	(1.00)PPi+(1.00)N-5-phosphoribosyl-anthranilate<=>(1.00)PRPP+(1.00)Anthranilate	(1.00)cpd00012[c]+(1.00)cpd02642[c]<=>(1.00)cpd00103[c]+(1.00)cpd00093[c]		-1000	0	0	0
rxn00704	5.4.2.2|5.4.2.5	R00959	(1.00)Glucose-1-phosphate<=>(1.00)D-glucose-6-phosphate	(1.00)cpd00089[c]<=>(1.00)cpd00079[c]		-1000	1000	1	0
rxn00183	1.5.1.12	R00245	(1.00)L-Glutamate5-semialdehyde+(1.00)H2O+(1.00)NAD<=>(2.00)H++(1.00)NADH+(1.00)L-Glutamate	(1.00)cpd00858[c]+(1.00)cpd00001[c]+(1.00)cpd00003[c]<=>(2.00)cpd00067[c]+(1.00)cpd00004[c]+(1.00)cpd00023[c]		0	1000	0	0
rxn00338	1.4.3.16	R00481	(1.00)L-Aspartate+(1.00)O2<=>(1.00)H++(1.00)Iminoaspartate+(1.00)H2O2	(1.00)cpd00041[c]+(1.00)cpd00007[c]<=>(1.00)cpd00067[c]+(1.00)cpd03470[c]+(1.00)cpd00025[c]		0	1000	0	0
rxn08040	2.7.8.-	R08856	(1.00)UDP-N-acetylglucosamine+(1.00)Undecaprenylphosphate<=>(1.00)UMP+(1.00)Undecaprenyl_diphospho N-acetyl-glucosamine	(1.00)cpd00037[c]+(1.00)cpd00286[c]<=>(1.00)cpd00091[c]+(1.00)cpd00946[c]		-1000	1000	1	0
rxn05248	6.2.1.3		(1.00)H++(1.00)fa4+(1.00)ATP+(1.00)CoA<=>(1.00)PPi+(1.00)AMP+(1.00)fa4coa	(1.00)cpd00067[c]+(1.00)cpd11438[c]+(1.00)cpd00002[c]+(1.00)cpd00010[c]<=>(1.00)cpd00012[c]+(1.00)cpd00018[c]+(1.00)cpd11439[c]		0	1000	0	0
rxn02831	6.2.1.26	R04030	(1.00)H++(1.00)Succinylbenzoate+(1.00)ATP+(1.00)CoA<=>(1.00)PPi+(1.00)Succinylbenzoyl-CoA+(1.00)AMP	(1.00)cpd00067[c]+(1.00)cpd01772[c]+(1.00)cpd00002[c]+(1.00)cpd00010[c]<=>(1.00)cpd00012[c]+(1.00)cpd02021[c]+(1.00)cpd00018[c]		0	1000	0	0
rxn04159	1.3.1.75	R06272	(1.00)NADPH+(1.00)H++(1.00)Divinyl_chlorophyllide a<=>(1.00)Chlorophyllide+(1.00)NADP	(1.00)cpd00005[c]+(1.00)cpd00067[c]+(1.00)cpd08632[c]<=>(1.00)cpd01449[c]+(1.00)cpd00006[c]		-1000	1000	1	0
rxn01459	1.2.1.3	R01986	(1.00)4-Aminobutanal+(1.00)H2O+(1.00)NADP<=>(1.00)NADPH+(2.00)H++(1.00)GABA	(1.00)cpd00434[c]+(1.00)cpd00001[c]+(1.00)cpd00006[c]<=>(1.00)cpd00005[c]+(2.00)cpd00067[c]+(1.00)cpd00281[c]		0	1000	0	0
rxn10223	2.7.7.41		(1.00)CTP+(1.00)1,2-diisopentadecanoyl-sn-glycerol_3-phosphate<=>(1.00)CDP-1,2-diisopentadecanoylglycerol+(1.00)PPi	(1.00)cpd00052[c]+(1.00)cpd15680[c]<=>(1.00)cpd15686[c]+(1.00)cpd00012[c]		-1000	1000	1	0
rxn02569	2.7.9.3	R03595	(1.00)H2O+(1.00)Selenide+(1.00)ATP<=>(1.00)Phosphate+(2.00)H++(1.00)Selenophosphate+(1.00)AMP	(1.00)cpd00001[c]+(1.00)cpd01078[c]+(1.00)cpd00002[c]<=>(1.00)cpd00009[c]+(2.00)cpd00067[c]+(1.00)cpd03078[c]+(1.00)cpd00018[c]		0	1000	1	0
rxn00710	4.1.1.23	R00965	(1.00)H++(1.00)Orotidylic_acid<=>(1.00)UMP+(1.00)CO2	(1.00)cpd00067[c]+(1.00)cpd00810[c]<=>(1.00)cpd00091[c]+(1.00)cpd00011[c]		0	1000	0	0
rxn03397	2.1.1.163	R04990	(1.00)2-Octaprenyl-6-methoxy-1,4-benzoquinone+(1.00)S-Adenosyl-L-methionine<=>(1.00)H++(1.00)2-Octaprenyl-3-methyl-6-methoxy-1,4-benzoquinone+(1.00)S-Adenosyl-homocysteine	(1.00)cpd03447[c]+(1.00)cpd00017[c]<=>(1.00)cpd00067[c]+(1.00)cpd03448[c]+(1.00)cpd00019[c]		0	1000	0	0
rxn08084	2.3.1.51		(1.00)Myristoyl-ACP+(1.00)1-tetradecanoyl-sn-glycerol_3-phosphate<=>(1.00)ACP+(1.00)1,2-ditetradecanoyl-sn-glycerol_3-phosphate	(1.00)cpd11466[c]+(1.00)cpd15331[c]<=>(1.00)cpd11493[c]+(1.00)cpd15522[c]		0	1000	0	0
rxn03136	4.3.2.2	R04559	(1.00)SAICAR<=>(1.00)AICAR+(1.00)Fumarate	(1.00)cpd02921[c]<=>(1.00)cpd02851[c]+(1.00)cpd00106[c]		-1000	1000	1	0
rxn10120	no match		(2.00)H++(1.00)Nitrate+(1.00)Ubiquinol-8<=>(1.00)Nitrite+(2.00)H++(1.00)Ubiquinone-8+(1.00)H2O	(2.00)cpd00067[c]+(1.00)cpd00209[c]+(1.00)cpd15561[c]<=>(1.00)cpd00075[c]+(2.00)cpd00067[e]+(1.00)cpd15560[c]+(1.00)cpd00001[c]		0	0	0	0
rxn05539	3.A.1.5|3.|.1.5		(1.00)H2O+(1.00)ATP+(1.00)Cys-Gly<=>(1.00)Phosphate+(1.00)H++(1.00)ADP+(1.00)Cys-Gly	(1.00)cpd00001[c]+(1.00)cpd00002[c]+(1.00)cpd01017[e]<=>(1.00)cpd00009[c]+(1.00)cpd00067[c]+(1.00)cpd00008[c]+(1.00)cpd01017[c]		0	1000	0	0
rxn01636	2.3.1.35	R02282	(1.00)N-Acetylornithine+(1.00)L-Glutamate<=>(1.00)N-Acetyl-L-glutamate+(1.00)Ornithine	(1.00)cpd00342[c]+(1.00)cpd00023[c]<=>(1.00)cpd00477[c]+(1.00)cpd00064[c]		-1000	1000	1	0
rxn05893	1.7.7.1	R00790	(1.00)NH3+(6.00)Oxidizedferredoxin+(2.00)H2O<=>(6.00)Reducedferredoxin+(1.00)Nitrite+(8.00)H+	(1.00)cpd00013[c]+(6.00)cpd11621[c]+(2.00)cpd00001[c]<=>(6.00)cpd11620[c]+(1.00)cpd00075[c]+(8.00)cpd00067[c]		-1000	0	1	0
rxn01137	3.5.4.4	R01560	(1.00)H++(1.00)Adenosine+(1.00)H2O<=>(1.00)NH3+(1.00)Inosine	(1.00)cpd00067[c]+(1.00)cpd00182[c]+(1.00)cpd00001[c]<=>(1.00)cpd00013[c]+(1.00)cpd00246[c]		0	1000	0	0
rxn05437	1.3.1.0		(1.00)H++(1.00)NADH+(1.00)12-methyl-trans-tetra-dec-2-enoyl-ACP<=>(1.00)12-methyl-tetra-decanoyl-ACP+(1.00)NAD	(1.00)cpd00067[c]+(1.00)cpd00004[c]+(1.00)cpd11514[c]<=>(1.00)cpd11515[c]+(1.00)cpd00003[c]		0	1000	0	0
rxn05170	3.A.1.1		(1.00)Maltose+(1.00)H2O+(1.00)ATP<=>(1.00)Phosphate+(1.00)H++(1.00)Maltose+(1.00)ADP	(1.00)cpd00179[e]+(1.00)cpd00001[c]+(1.00)cpd00002[c]<=>(1.00)cpd00009[c]+(1.00)cpd00067[c]+(1.00)cpd00179[c]+(1.00)cpd00008[c]		0	1000	0	0
rxn10210	2.3.1.15		(1.00)fa6coa+(1.00)Glycerol-3-phosphate<=>(1.00)1-isohexadecanoyl-sn-glycerol_3-phosphate+(1.00)CoA	(1.00)cpd11441[c]+(1.00)cpd00080[c]<=>(1.00)cpd15676[c]+(1.00)cpd00010[c]		0	1000	0	0
rxn02303	1.3.3.3	R03220	(2.00)H++(1.00)O2+(1.00)CoproporphyrinogenIII<=>(1.00)ProtoporphyrinogenIX+(2.00)H2O+(2.00)CO2	(2.00)cpd00067[c]+(1.00)cpd00007[c]+(1.00)cpd02083[c]<=>(1.00)cpd00791[c]+(2.00)cpd00001[c]+(2.00)cpd00011[c]		-1000	1000	1	0
rxn12850	3.A.1.5		(1.00)H2O+(1.00)Gly-Phe+(1.00)ATP<=>(1.00)Phosphate+(1.00)H++(1.00)Gly-Phe+(1.00)ADP	(1.00)cpd00001[c]+(1.00)cpd15605[e]+(1.00)cpd00002[c]<=>(1.00)cpd00009[c]+(1.00)cpd00067[c]+(1.00)cpd15605[c]+(1.00)cpd00008[c]		0	1000	0	0
rxn00256	2.3.3.1	R00351	(1.00)H++(1.00)Citrate+(1.00)CoA<=>(1.00)Oxaloacetate+(1.00)H2O+(1.00)Acetyl-CoA	(1.00)cpd00067[c]+(1.00)cpd00137[c]+(1.00)cpd00010[c]<=>(1.00)cpd00032[c]+(1.00)cpd00001[c]+(1.00)cpd00022[c]		-1000	0	0	0
rxn00216	no match	R00299	(1.00)ATP+(1.00)D-Glucose<=>(1.00)ADP+(1.00)D-glucose-6-phosphate	(1.00)cpd00002[c]+(1.00)cpd00027[c]<=>(1.00)cpd00008[c]+(1.00)cpd00079[c]		0	1000	1	0
rxn02503	2.7.6.3	R03503	(1.00)ATP+(1.00)6-hydroxymethyl_dihydropterin<=>(1.00)7,8-Dihydropterin_pyrophosphate+(1.00)AMP	(1.00)cpd00002[c]+(1.00)cpd00954[c]<=>(1.00)cpd02920[c]+(1.00)cpd00018[c]		0	1000	1	0
rxn08194	2.5.1.17	R01492	(1.00)Cbl+(1.00)ATP<=>(1.00)Triphosphate+(1.00)Calomide	(1.00)cpd00635[c]+(1.00)cpd00002[c]<=>(1.00)cpd00421[c]+(1.00)cpd00166[c]		0	1000	1	0
rxn05411	4.2.1.0		(1.00)4-methyl-3-hydroxy-pentanoyl-ACP<=>(1.00)H2O+(1.00)4-methyl-trans-pent-2-enoyl-ACP	(1.00)cpd11547[c]<=>(1.00)cpd00001[c]+(1.00)cpd11548[c]		-1000	1000	1	0
rxn10124	no match		(1.00)2-Demethylmenaquinone_8+(3.80)H++(1.00)NADH<=>(1.00)2-Demethylmenaquinol_8+(2.80)H++(1.00)NAD	(1.00)cpd15352[c]+(3.80)cpd00067[c]+(1.00)cpd00004[c]<=>(1.00)cpd15353[c]+(2.80)cpd00067[e]+(1.00)cpd00003[c]		-1000	1000	1	0
rxn00194	4.1.1.15	R00261	(1.00)H++(1.00)L-Glutamate<=>(1.00)GABA+(1.00)CO2	(1.00)cpd00067[c]+(1.00)cpd00023[c]<=>(1.00)cpd00281[c]+(1.00)cpd00011[c]		0	1000	0	0
rxn05440	1.3.1.0		(1.00)7-methyl-trans-oct-2-enoyl-ACP+(1.00)H++(1.00)NADH<=>(1.00)7-methyl-octanoyl-ACP+(1.00)NAD	(1.00)cpd11527[c]+(1.00)cpd00067[c]+(1.00)cpd00004[c]<=>(1.00)cpd11528[c]+(1.00)cpd00003[c]		0	1000	0	0
rxn03843	2.5.1.-	R05555	(1.00)Isopentenyldiphosphate+(1.00)Farnesyldiphosphate<=>(1.00)PPi+(1.00)trans,trans,cis-Geranylgeranyl_diphosphate	(1.00)cpd00113[c]+(1.00)cpd00350[c]<=>(1.00)cpd00012[c]+(1.00)cpd08211[c]		0	1000	0	0
rxn02775	2.1.1.130	R03948	(1.00)H++(1.00)Precorrin_2+(1.00)S-Adenosyl-L-methionine<=>(1.00)S-Adenosyl-homocysteine+(1.00)Precorrin_3A	(1.00)cpd00067[c]+(1.00)cpd01620[c]+(1.00)cpd00017[c]<=>(1.00)cpd00019[c]+(1.00)cpd03420[c]		-1000	1000	1	0
rxn05349	2.3.1.180|2.3.1.38|2.3.1.85|2.3.1.86	R01624	(1.00)ACP+(1.00)Acetyl-CoA<=>(1.00)Acetyl-ACP+(1.00)CoA	(1.00)cpd11493[c]+(1.00)cpd00022[c]<=>(1.00)cpd11494[c]+(1.00)cpd00010[c]		-1000	1000	1	0
rxn10260	2.7.8.5		(1.00)Glycerol-3-phosphate+(1.00)CDP-1,2-dianteisoheptadecanoylglycerol<=>(1.00)Dianteisoheptadecanoylphosphatidylglycerophosphate+(1.00)CMP	(1.00)cpd00080[c]+(1.00)cpd15684[c]<=>(1.00)cpd15717[c]+(1.00)cpd00046[c]		-1000	1000	1	0
rxn06672	6.3.4.14	R04385	(1.00)Holo-[carboxylase]+(1.00)H2CO3+(1.00)ATP<=>(1.00)Phosphate+(1.00)H++(1.00)Carboxybiotin-carboxyl-carrier_protein+(1.00)ADP	(1.00)cpd12848[c]+(1.00)cpd00242[c]+(1.00)cpd00002[c]<=>(1.00)cpd00009[c]+(1.00)cpd00067[c]+(1.00)cpd12543[c]+(1.00)cpd00008[c]		0	1000	1	0
rxn07589	no match	R07775	(1.00)Cobalt-precorrin_7+(1.00)S-Adenosyl-L-methionine<=>(1.00)Cobalt-precorrin_8+(1.00)S-Adenosyl-homocysteine+(1.00)CO2	(1.00)cpd14961[c]+(1.00)cpd00017[c]<=>(1.00)cpd08375[c]+(1.00)cpd00019[c]+(1.00)cpd00011[c]		-1000	1000	1	0
rxn08333	no match		(1.00)H++(1.00)1-4-Dihydroxy-2-naphthoate+(1.00)Farnesylfarnesylgeraniol<=>(1.00)2-Demethylmenaquinol_8+(1.00)PPi+(1.00)CO2	(1.00)cpd00067[c]+(1.00)cpd02295[c]+(1.00)cpd02557[c]<=>(1.00)cpd15353[c]+(1.00)cpd00012[c]+(1.00)cpd00011[c]		0	1000	0	0
rxn04996	1.17.1.2	R07219	(1.00)H2O+(1.00)DMAPP+(1.00)NADP<=>(1.00)NADPH+(1.00)H++(1.00)1-Hydroxy-2-methyl-2-butenyl_4-diphosphate	(1.00)cpd00001[c]+(1.00)cpd00202[c]+(1.00)cpd00006[c]<=>(1.00)cpd00005[c]+(1.00)cpd00067[c]+(1.00)cpd08615[c]		-1000	0	0	0
rxn01329	5.4.2.8	R01818	(1.00)D-mannose-6-phosphate<=>(1.00)D-Mannose1-phosphate	(1.00)cpd00235[c]<=>(1.00)cpd00485[c]		-1000	1000	1	0
rxn00285	6.2.1.5	R00405	(1.00)Succinate+(1.00)ATP+(1.00)CoA<=>(1.00)Phosphate+(1.00)ADP+(1.00)Succinyl-CoA	(1.00)cpd00036[c]+(1.00)cpd00002[c]+(1.00)cpd00010[c]<=>(1.00)cpd00009[c]+(1.00)cpd00008[c]+(1.00)cpd00078[c]		0	1000	1	0
rxn00547	2.7.1.4	R00760	(1.00)D-Fructose+(1.00)ATP<=>(1.00)D-fructose-6-phosphate+(1.00)ADP	(1.00)cpd00082[c]+(1.00)cpd00002[c]<=>(1.00)cpd00072[c]+(1.00)cpd00008[c]		0	1000	1	0
rxn04047	2.1.1.131	R05809	(1.00)Cobalt-precorrin_3+(1.00)S-Adenosyl-L-methionine<=>(1.00)H++(1.00)Cobalt-precorrin_4+(1.00)S-Adenosyl-homocysteine	(1.00)cpd08369[c]+(1.00)cpd00017[c]<=>(1.00)cpd00067[c]+(1.00)cpd08370[c]+(1.00)cpd00019[c]		-1000	1000	1	0
rxn00717	3.5.4.1	R00974	(1.00)H++(1.00)H2O+(1.00)Cytosine<=>(1.00)NH3+(1.00)Uracil	(1.00)cpd00067[c]+(1.00)cpd00001[c]+(1.00)cpd00307[c]<=>(1.00)cpd00013[c]+(1.00)cpd00092[c]		0	1000	0	0
rxn02835	3.5.4.19	R04037	(1.00)H2O+(1.00)Phosphoribosyl-AMP<=>(1.00)phosphoribosylformiminoaicar-phosphate	(1.00)cpd00001[c]+(1.00)cpd01777[c]<=>(1.00)cpd02979[c]		-1000	1000	1	0
rxn02373	1.2.1.41	R03313	(1.00)Phosphate+(1.00)L-Glutamate5-semialdehyde+(1.00)NADP<=>(1.00)L-Glutamyl_5-phosphate+(1.00)NADPH	(1.00)cpd00009[c]+(1.00)cpd00858[c]+(1.00)cpd00006[c]<=>(1.00)cpd02097[c]+(1.00)cpd00005[c]		-1000	0	0	0
rxn01353	2.7.4.6	R01857	(1.00)ATP+(1.00)dGDP<=>(1.00)ADP+(1.00)dGTP	(1.00)cpd00002[c]+(1.00)cpd00295[c]<=>(1.00)cpd00008[c]+(1.00)cpd00241[c]		0	1000	1	0
rxn08655	no match		(1.00)Glycolate+(1.00)Ubiquinone-8<=>(1.00)Glyoxalate+(1.00)Ubiquinol-8	(1.00)cpd00139[c]+(1.00)cpd15560[c]<=>(1.00)cpd00040[c]+(1.00)cpd15561[c]		0	0	1	0
rxn00726	4.1.3.27	R00985	(1.00)NH3+(1.00)Chorismate<=>(1.00)H++(1.00)Pyruvate+(1.00)Anthranilate+(1.00)H2O	(1.00)cpd00013[c]+(1.00)cpd00216[c]<=>(1.00)cpd00067[c]+(1.00)cpd00020[c]+(1.00)cpd00093[c]+(1.00)cpd00001[c]		0	1000	0	0
rxn05506	no match		(1.00)Arsenate<=>(1.00)Arsenate	(1.00)cpd01048[c]<=>(1.00)cpd01048[e]		0	1000	0	0
rxn01484	3.5.1.25	R02059	(1.00)H2O+(1.00)N-Acetyl-D-glucosamine_6-phosphate<=>(1.00)Acetate+(1.00)D-Glucosamine_phosphate	(1.00)cpd00001[c]+(1.00)cpd00293[c]<=>(1.00)cpd00029[c]+(1.00)cpd00288[c]		-1000	1000	1	0
rxn05287	2.5.1.-	R07475	(1.00)Isopentenyldiphosphate+(1.00)Geranylgeranyl_diphosphate<=>(1.00)pendp+(1.00)PPi	(1.00)cpd00113[c]+(1.00)cpd00289[c]<=>(1.00)cpd02591[c]+(1.00)cpd00012[c]		0	1000	0	0
rxn10307	no match		(24.00)UDP-N-acetylglucosamine+(1.00)Palmitoyllipoteichoic_acid (n=24), linked, unsubstituted<=>(24.00)UDP+(1.00)Palmitoyllipoteichoic_acid (n=24), linked, N-acetyl-D-glucosamine	(24.00)cpd00037[c]+(1.00)cpd15746[c]<=>(24.00)cpd00014[c]+(1.00)cpd15764[c]		-1000	1000	1	0
rxn00077	2.7.1.23	R00104	(1.00)ATP+(1.00)NAD<=>(1.00)ADP+(1.00)NADP	(1.00)cpd00002[c]+(1.00)cpd00003[c]<=>(1.00)cpd00008[c]+(1.00)cpd00006[c]		0	1000	1	0
rxn00545	2.7.1.11	R00756	(1.00)D-fructose-6-phosphate+(1.00)ATP<=>(1.00)D-fructose-1,6-bisphosphate+(1.00)ADP	(1.00)cpd00072[c]+(1.00)cpd00002[c]<=>(1.00)cpd00290[c]+(1.00)cpd00008[c]		0	1000	1	0
rxn05345	2.3.1.41	R04726	(1.00)H++(1.00)Dodecanoyl-ACP+(1.00)Malonyl-acyl-carrierprotein-<=>(1.00)3-oxotetradecanoyl-acp+(1.00)ACP+(1.00)CO2	(1.00)cpd00067[c]+(1.00)cpd11468[c]+(1.00)cpd11492[c]<=>(1.00)cpd11491[c]+(1.00)cpd11493[c]+(1.00)cpd00011[c]		0	1000	0	0
rxn05379	2.3.1.0		(1.00)H++(1.00)Malonyl-acyl-carrierprotein-+(1.00)12-methyl-tetra-decanoyl-ACP<=>(1.00)14-methyl-3-oxo-hexa-decanoyl-ACP+(1.00)ACP+(1.00)CO2	(1.00)cpd00067[c]+(1.00)cpd11492[c]+(1.00)cpd11515[c]<=>(1.00)cpd11516[c]+(1.00)cpd11493[c]+(1.00)cpd00011[c]		0	1000	0	0
rxn01334	4.1.2.13	R01829	(1.00)Sedoheptulose_1,7-bisphosphate<=>(1.00)Glycerone-phosphate+(1.00)D-Erythrose4-phosphate	(1.00)cpd00349[c]<=>(1.00)cpd00095[c]+(1.00)cpd00236[c]		-1000	1000	1	0
rxn09450	6.2.1.3		(1.00)hexadecenoate+(1.00)H++(1.00)ATP+(1.00)CoA<=>(1.00)PPi+(1.00)Hexadecenoyl-CoA+(1.00)AMP	(1.00)cpd15237[c]+(1.00)cpd00067[c]+(1.00)cpd00002[c]+(1.00)cpd00010[c]<=>(1.00)cpd00012[c]+(1.00)cpd15238[c]+(1.00)cpd00018[c]		0	1000	0	0
rxn00514	3.6.1.19	R00720	(1.00)H2O+(1.00)ITP<=>(1.00)PPi+(1.00)IMP	(1.00)cpd00001[c]+(1.00)cpd00068[c]<=>(1.00)cpd00012[c]+(1.00)cpd00114[c]		0	1000	0	0
rxn10218	2.3.1.51		(1.00)1-anteisopentadecanoyl-sn-glycerol_3-phosphate+(1.00)fa4coa<=>(1.00)1,2-dianteisopentadecanoyl-sn-glycerol_3-phosphate+(1.00)CoA	(1.00)cpd15675[c]+(1.00)cpd11439[c]<=>(1.00)cpd15681[c]+(1.00)cpd00010[c]		0	1000	0	0
rxn10308	no match		(24.00)UDP-N-acetylglucosamine+(1.00)Myristoyllipoteichoic_acid (n=24), linked, unsubstituted<=>(24.00)UDP+(1.00)Myristoyllipoteichoic_acid (n=24), linked, N-acetyl-D-glucosamine	(24.00)cpd00037[c]+(1.00)cpd15747[c]<=>(24.00)cpd00014[c]+(1.00)cpd15765[c]		-1000	1000	1	0
rxn05249	6.2.1.3		(1.00)fa3+(1.00)H++(1.00)ATP+(1.00)CoA<=>(1.00)fa3coa+(1.00)PPi+(1.00)AMP	(1.00)cpd11436[c]+(1.00)cpd00067[c]+(1.00)cpd00002[c]+(1.00)cpd00010[c]<=>(1.00)cpd11437[c]+(1.00)cpd00012[c]+(1.00)cpd00018[c]		0	1000	0	0
rxn02897	2.4.2.21	R04148	(1.00)Dimethylbenzimidazole+(1.00)Nicotinate_ribonucleotide<=>(1.00)H++(1.00)alpha-Ribazole_5-phosphate+(1.00)Niacin	(1.00)cpd01997[c]+(1.00)cpd00873[c]<=>(1.00)cpd00067[c]+(1.00)cpd02904[c]+(1.00)cpd00218[c]		-1000	1000	1	0
rxn01213	2.5.1.1	R01658	(1.00)Isopentenyldiphosphate+(1.00)DMAPP<=>(1.00)Geranyldiphosphate+(1.00)PPi	(1.00)cpd00113[c]+(1.00)cpd00202[c]<=>(1.00)cpd00283[c]+(1.00)cpd00012[c]		0	1000	0	0
rxn03147	6.3.2.6	R04591	(1.00)L-Aspartate+(1.00)5-Phosphoribosyl-4-carboxy-5-aminoimidazole+(1.00)ATP<=>(1.00)Phosphate+(2.00)H++(1.00)ADP+(1.00)SAICAR	(1.00)cpd00041[c]+(1.00)cpd02893[c]+(1.00)cpd00002[c]<=>(1.00)cpd00009[c]+(2.00)cpd00067[c]+(1.00)cpd00008[c]+(1.00)cpd02921[c]		0	1000	0	0
rxn10196	3.6.3.40		(1.00)Peptidoglycan_polymer (n-1 subunits)+(1.00)Prenol-45n_teichoic acid-alanine substituted<=>(1.00)glycerol_teichoic acid (n=45), linked, D-ala substituted+(1.00)Undecaprenylphosphate	(1.00)cpd15666[c]+(1.00)cpd15663[c]<=>(1.00)cpd15668[c]+(1.00)cpd00286[c]		-1000	1000	1	0
rxn05384	2.3.1.0		(1.00)H++(1.00)isovaleryl-ACP+(1.00)Malonyl-acyl-carrierprotein-<=>(1.00)5-methyl-3-oxo-hexanoyl-ACP+(1.00)ACP+(1.00)CO2	(1.00)cpd00067[c]+(1.00)cpd11520[c]+(1.00)cpd11492[c]<=>(1.00)cpd11521[c]+(1.00)cpd11493[c]+(1.00)cpd00011[c]		0	1000	0	0
rxn01917	2.7.2.8	R02649	(1.00)H++(1.00)N-Acetyl-L-glutamate+(1.00)ATP<=>(1.00)n-acetylglutamyl-phosphate+(1.00)ADP	(1.00)cpd00067[c]+(1.00)cpd00477[c]+(1.00)cpd00002[c]<=>(1.00)cpd02552[c]+(1.00)cpd00008[c]		0	1000	1	0
rxn08087	2.3.1.51		(1.00)1-hexadec-9-enoyl-sn-glycerol_3-phosphate+(1.00)Hexadecenoyl-ACP<=>(1.00)ACP+(1.00)1,2-dihexadec-9-enoyl-sn-glycerol_3-phosphate	(1.00)cpd15326[c]+(1.00)cpd15239[c]<=>(1.00)cpd11493[c]+(1.00)cpd15525[c]		0	1000	0	0
rxn01100	2.7.2.3	R01512	(1.00)3-Phosphoglycerate+(1.00)H++(1.00)ATP<=>(1.00)1,3-Bisphospho-D-glycerate+(1.00)ADP	(1.00)cpd00169[c]+(1.00)cpd00067[c]+(1.00)cpd00002[c]<=>(1.00)cpd00203[c]+(1.00)cpd00008[c]		-1000	1000	1	0
rxn03884	4.1.2.-	R05605	(1.00)2-Keto-3-deoxy-6-phosphogluconate<=>(1.00)Pyruvate+(1.00)Glyceraldehyde3-phosphate	(1.00)cpd02711[c]<=>(1.00)cpd00020[c]+(1.00)cpd00102[c]		-1000	1000	1	0
rxn01211	3.5.4.9	R01655	(1.00)H2O+(1.00)5-10-Methenyltetrahydrofolate<=>(1.00)H++(1.00)10-Formyltetrahydrofolate	(1.00)cpd00001[c]+(1.00)cpd00347[c]<=>(1.00)cpd00067[c]+(1.00)cpd00201[c]		-1000	1000	1	0
rxn01602	1.5.1.3	R02236	(1.00)Dihydrofolate+(1.00)NADP<=>(1.00)NADPH+(1.00)Folate+(1.00)H+	(1.00)cpd00330[c]+(1.00)cpd00006[c]<=>(1.00)cpd00005[c]+(1.00)cpd00393[c]+(1.00)cpd00067[c]		-1000	1000	1	0
rxn03409	6.3.1.2		(1.00)NH3+(1.00)ATP+(1.00)Undecaprenyl-diphospho-N-acetylmuramoyl-N-acetylglucosamine-L-ala-D-glu-meso-2-6-diaminopimeloyl-D-ala-D-ala<=>(1.00)Phosphate+(1.00)H++(1.00)ADP+(1.00)Undecaprenyl-diphospho-N-acetylmuramoyl-(N-acetylglucosamine)-L-alanyl-D-glutaminyl-meso-2,6-diaminopimeloyl-D-alanyl-D-alanine	(1.00)cpd00013[c]+(1.00)cpd00002[c]+(1.00)cpd03495[c]<=>(1.00)cpd00009[c]+(1.00)cpd00067[c]+(1.00)cpd00008[c]+(1.00)cpd03496[c]		0	1000	0	0
rxn00525	1.3.1.43|1.3.1.79	R00732	(1.00)Pretyrosine+(1.00)NAD<=>(1.00)NADH+(1.00)CO2+(1.00)L-Tyrosine	(1.00)cpd00616[c]+(1.00)cpd00003[c]<=>(1.00)cpd00004[c]+(1.00)cpd00011[c]+(1.00)cpd00069[c]		0	1000	0	0
rxn02782	5.5.1.1	R06989	(1.00)Muconolactone<=>(1.00)cis,cis-Muconate+(1.00)H+	(1.00)cpd02536[c]<=>(1.00)cpd01630[c]+(1.00)cpd00067[c]		-1000	1000	1	0
rxn00371	1.2.1.2	R00519	(1.00)Formate+(1.00)NAD<=>(1.00)NADH+(1.00)CO2	(1.00)cpd00047[c]+(1.00)cpd00003[c]<=>(1.00)cpd00004[c]+(1.00)cpd00011[c]		0	1000	0	0
rxn04152	1.14.13.81	R06265	(1.00)NADPH+(1.00)Mg-Protoporphyrin_IX 13-monomethyl ester+(1.00)H++(1.00)O2<=>(1.00)13(1)-Hydroxy-Mg-protoporphyrin_IX 13-monomethyl ester+(1.00)H2O+(1.00)NADP	(1.00)cpd00005[c]+(1.00)cpd02762[c]+(1.00)cpd00067[c]+(1.00)cpd00007[c]<=>(1.00)cpd08629[c]+(1.00)cpd00001[c]+(1.00)cpd00006[c]		-1000	1000	1	0
rxn09997	no match		(1.00)AIR+(1.00)H2O<=>(1.00)Toxopyrimidine+(1.00)Phosphate+(2.00)H++(0.50)O2+(1.00)Glycolaldehyde	(1.00)cpd02140[c]+(1.00)cpd00001[c]<=>(1.00)cpd00939[c]+(1.00)cpd00009[c]+(2.00)cpd00067[c]+(0.50)cpd00007[c]+(1.00)cpd00229[c]		-1000	1000	1	0
rxn03916	2.7.-.-|2.7.7.-	R05644	(1.00)D-Glycero-D-manno-heptose1-phosphate+(1.00)ATP<=>(1.00)ADP-D-glycero-D-manno-heptose+(1.00)PPi	(1.00)cpd04920[c]+(1.00)cpd00002[c]<=>(1.00)cpd03830[c]+(1.00)cpd00012[c]		0	1000	1	0
rxn05389	1.1.1.0		(1.00)NADPH+(1.00)H++(1.00)7-methyl-3-oxo-octanoyl-ACP<=>(1.00)7-methyl-3-hydroxy-octanoyl-ACP+(1.00)NADP	(1.00)cpd00005[c]+(1.00)cpd00067[c]+(1.00)cpd11525[c]<=>(1.00)cpd11526[c]+(1.00)cpd00006[c]		-1000	1000	1	0
rxn03146	3.5.1.-	R04587	(1.00)UDP-3-O-(beta-hydroxymyristoyl)-N-acetylglucosamine+(1.00)H2O<=>(1.00)Acetate+(1.00)UDP-3-O-(beta-hydroxymyristoyl)-D-glucosamine	(1.00)cpd02886[c]+(1.00)cpd00001[c]<=>(1.00)cpd00029[c]+(1.00)cpd03584[c]		-1000	1000	1	0
rxn00184	1.4.1.3|1.4.1.4	R00248	(1.00)H2O+(1.00)NADP+(1.00)L-Glutamate<=>(1.00)NADPH+(1.00)NH3+(1.00)H++(1.00)2-Oxoglutarate	(1.00)cpd00001[c]+(1.00)cpd00006[c]+(1.00)cpd00023[c]<=>(1.00)cpd00005[c]+(1.00)cpd00013[c]+(1.00)cpd00067[c]+(1.00)cpd00024[c]		-1000	1000	1	0
rxn11946	2.1.1.64	R05614	(1.00)2-Octaprenyl-3-methyl-5-hydroxy-6-methoxy-1,4-benzoquinone+(1.00)S-Adenosyl-L-methionine<=>(1.00)Ubiquinone-8+(1.00)S-Adenosyl-homocysteine	(1.00)cpd03449[c]+(1.00)cpd00017[c]<=>(1.00)cpd15560[c]+(1.00)cpd00019[c]		-1000	1000	1	0
rxn05200	no match		(1.00)H++(1.00)Thymidine<=>(1.00)H++(1.00)Thymidine	(1.00)cpd00067[e]+(1.00)cpd00184[e]<=>(1.00)cpd00067[c]+(1.00)cpd00184[c]		-1000	1000	1	0
rxn04674	2.1.1.-	R06859	(1.00)S-Adenosyl-L-methionine+(1.00)Demethylphylloquinone<=>(1.00)Vitamin_K1+(1.00)H++(1.00)S-Adenosyl-homocysteine	(1.00)cpd00017[c]+(1.00)cpd09410[c]<=>(1.00)cpd01401[c]+(1.00)cpd00067[c]+(1.00)cpd00019[c]		0	1000	0	0
rxn05444	1.3.1.0		(1.00)H++(1.00)15-methyl-trans-hexa-dec-2-enoyl-ACP+(1.00)NADH<=>(1.00)15-methyl-hexa-decanoyl-ACP+(1.00)NAD	(1.00)cpd00067[c]+(1.00)cpd11543[c]+(1.00)cpd00004[c]<=>(1.00)cpd11544[c]+(1.00)cpd00003[c]		0	1000	0	0
rxn00770	2.7.6.1	R01049	(1.00)ATP+(1.00)ribose-5-phosphate<=>(1.00)PRPP+(1.00)AMP	(1.00)cpd00002[c]+(1.00)cpd00101[c]<=>(1.00)cpd00103[c]+(1.00)cpd00018[c]		0	1000	1	0
rxn01301	1.1.1.3	R01773	(1.00)L-Homoserine+(1.00)NAD<=>(1.00)L-Aspartate4-semialdehyde+(1.00)H++(1.00)NADH	(1.00)cpd00227[c]+(1.00)cpd00003[c]<=>(1.00)cpd00346[c]+(1.00)cpd00067[c]+(1.00)cpd00004[c]		-1000	1000	1	0
rxn05163	no match		(1.00)Putrescine+(1.00)H2O+(1.00)ATP<=>(1.00)Phosphate+(1.00)H++(1.00)Putrescine+(1.00)ADP	(1.00)cpd00118[e]+(1.00)cpd00001[c]+(1.00)cpd00002[c]<=>(1.00)cpd00009[c]+(1.00)cpd00067[c]+(1.00)cpd00118[c]+(1.00)cpd00008[c]		0	1000	0	0
rxn05431	4.2.1.0		(1.00)14-methyl-3-hydroxy-pentadecanoyl-ACP<=>(1.00)14-methyl-trans-pentadec-2-enoyl-ACP+(1.00)H2O	(1.00)cpd11567[c]<=>(1.00)cpd11568[c]+(1.00)cpd00001[c]		-1000	1000	1	0
rxn00192	2.3.1.1	R00259	(1.00)L-Glutamate+(1.00)Acetyl-CoA<=>(1.00)H++(1.00)N-Acetyl-L-glutamate+(1.00)CoA	(1.00)cpd00023[c]+(1.00)cpd00022[c]<=>(1.00)cpd00067[c]+(1.00)cpd00477[c]+(1.00)cpd00010[c]		0	1000	0	0
rxn01603	6.3.2.12|6.3.2.17	R02237	(1.00)Dihydropteroate+(1.00)ATP+(1.00)L-Glutamate<=>(1.00)Phosphate+(1.00)H++(1.00)Dihydrofolate+(1.00)ADP	(1.00)cpd00683[c]+(1.00)cpd00002[c]+(1.00)cpd00023[c]<=>(1.00)cpd00009[c]+(1.00)cpd00067[c]+(1.00)cpd00330[c]+(1.00)cpd00008[c]		0	1000	0	0
rxn05396	2.3.1.0		(1.00)H++(1.00)Malonyl-acyl-carrierprotein-+(1.00)9-methyl-decanoyl-ACP<=>(1.00)ACP+(1.00)11-methyl-3-oxo-dodecanoyl-ACP+(1.00)CO2	(1.00)cpd00067[c]+(1.00)cpd11492[c]+(1.00)cpd11532[c]<=>(1.00)cpd11493[c]+(1.00)cpd11533[c]+(1.00)cpd00011[c]		0	1000	0	0
rxn01241	1.8.1.4	R07618	(1.00)Dihydrolipoamide+(1.00)NAD<=>(1.00)Lipoamide+(1.00)H++(1.00)NADH	(1.00)cpd00449[c]+(1.00)cpd00003[c]<=>(1.00)cpd00213[c]+(1.00)cpd00067[c]+(1.00)cpd00004[c]		-1000	1000	1	0
rxn04046	2.1.1.151		(1.00)Cobalt-precorrin_2+(1.00)S-Adenosyl-L-methionine<=>(1.00)H++(1.00)S-Adenosyl-homocysteine+(1.00)Cobalt-precorrin_3	(1.00)cpd08368[c]+(1.00)cpd00017[c]<=>(1.00)cpd00067[c]+(1.00)cpd00019[c]+(1.00)cpd08369[c]		-1000	1000	1	0
rxn00650	3.4.11.2|3.4.11.1|3.4.11.23|3.4.13.3	R00899	(1.00)H2O+(1.00)Cys-Gly<=>(1.00)Glycine+(1.00)L-Cysteine	(1.00)cpd00001[c]+(1.00)cpd01017[c]<=>(1.00)cpd00033[c]+(1.00)cpd00084[c]		-1000	1000	1	0
rxn13782	no match		nothing<=>(1.00)Protein_biosynthesis	nothing<=>(1.00)cpd17041[c]		0	1000	0	0
rxn00910	1.5.1.20	R01224	(1.00)5-Methyltetrahydrofolate+(1.00)NADP<=>(1.00)NADPH+(1.00)H++(1.00)5-10-Methylenetetrahydrofolate	(1.00)cpd00345[c]+(1.00)cpd00006[c]<=>(1.00)cpd00005[c]+(1.00)cpd00067[c]+(1.00)cpd00125[c]		-1000	1000	1	0
rxn02286	6.3.2.8	R03193	(1.00)L-Alanine+(1.00)ATP+(1.00)UDP-MurNAc<=>(1.00)Phosphate+(1.00)UDP-N-acetylmuramoyl-L-alanine+(1.00)H++(1.00)ADP	(1.00)cpd00035[c]+(1.00)cpd00002[c]+(1.00)cpd00773[c]<=>(1.00)cpd00009[c]+(1.00)cpd00890[c]+(1.00)cpd00067[c]+(1.00)cpd00008[c]		0	1000	0	0
rxn03159	2.4.1.182	R04606	(1.00)UDP-2,3-bis(3-hydroxytetradecanoyl)glucosamine+(1.00)Lipid_X<=>(1.00)Lipid_A disaccharide+(1.00)UDP	(1.00)cpd02835[c]+(1.00)cpd02930[c]<=>(1.00)cpd03002[c]+(1.00)cpd00014[c]		-1000	1000	1	0
rxn03407	6.3.1.2	R05030	(1.00)NH3+(1.00)ATP+(1.00)Undecaprenyl-diphospho-N-acetylmuramoyl-(N-acetylglucosamine)-L-alanyl-gamma-D-glutamyl-L-lysyl-D-alanyl-D-alanine<=>(1.00)Phosphate+(1.00)H++(1.00)ADP+(1.00)Undecaprenyl-diphospho-N-acetylmuramoyl-(N-acetylglucosamine)-L-alanyl-D-isoglutaminyl-L-lysyl-D-alanyl-D-alanine	(1.00)cpd00013[c]+(1.00)cpd00002[c]+(1.00)cpd03491[c]<=>(1.00)cpd00009[c]+(1.00)cpd00067[c]+(1.00)cpd00008[c]+(1.00)cpd03492[c]		0	1000	0	0
rxn05363	2.3.1.0		(1.00)H++(1.00)Malonyl-acyl-carrierprotein-+(1.00)4-methyl-hexanoyl-ACP<=>(1.00)ACP+(1.00)CO2+(1.00)6-methyl-3-oxo-octanoyl-ACP	(1.00)cpd00067[c]+(1.00)cpd11492[c]+(1.00)cpd11499[c]<=>(1.00)cpd11493[c]+(1.00)cpd00011[c]+(1.00)cpd11500[c]		0	1000	0	0
rxn01107	3.1.1.17	R01519	(1.00)H2O+(1.00)Gluconolactone<=>(1.00)H++(1.00)GLCN	(1.00)cpd00001[c]+(1.00)cpd00170[c]<=>(1.00)cpd00067[c]+(1.00)cpd00222[c]		0	1000	0	0
rxn01682	4.2.1.20	R02340	(1.00)Indoleglycerol_phosphate<=>(1.00)indol+(1.00)Glyceraldehyde3-phosphate	(1.00)cpd02210[c]<=>(1.00)cpd00359[c]+(1.00)cpd00102[c]		-1000	1000	1	0
rxn02474	1.1.1.193	R03458	(1.00)5-Amino-6-5-phosphoribitylaminouracil+(1.00)NADP<=>(1.00)NADPH+(1.00)H++(1.00)5-Amino-6-5-phosphoribosylaminouracil	(1.00)cpd02720[c]+(1.00)cpd00006[c]<=>(1.00)cpd00005[c]+(1.00)cpd00067[c]+(1.00)cpd00931[c]		-1000	1000	1	0
rxn05324	1.3.1.9	R04724	(1.00)Dodecanoyl-ACP+(1.00)NAD<=>(1.00)(2E)-Dodecenoyl-[acp]+(1.00)H++(1.00)NADH	(1.00)cpd11468[c]+(1.00)cpd00003[c]<=>(1.00)cpd11469[c]+(1.00)cpd00067[c]+(1.00)cpd00004[c]		-1000	0	0	0
rxn00611	1.1.1.8|1.1.1.94|1.1.1.261	R00842	(1.00)Glycerol-3-phosphate+(1.00)NAD<=>(1.00)H++(1.00)NADH+(1.00)Glycerone-phosphate	(1.00)cpd00080[c]+(1.00)cpd00003[c]<=>(1.00)cpd00067[c]+(1.00)cpd00004[c]+(1.00)cpd00095[c]		-1000	1000	1	0
rxn08300	2.7.1.107		(1.00)1,2-Diacyl-sn-glycerol_dioctadec-11-enoyl+(1.00)ATP<=>(1.00)1,2-dioctadec-11-enoyl-sn-glycerol_3-phosphate+(1.00)ADP	(1.00)cpd15312[c]+(1.00)cpd00002[c]<=>(1.00)cpd15527[c]+(1.00)cpd00008[c]		0	1000	1	0
rxn00211	1.1.1.22	R00286	(1.00)H2O+(1.00)UDP-glucose+(2.00)NAD<=>(3.00)H++(2.00)NADH+(1.00)UDPglucuronate	(1.00)cpd00001[c]+(1.00)cpd00026[c]+(2.00)cpd00003[c]<=>(3.00)cpd00067[c]+(2.00)cpd00004[c]+(1.00)cpd00144[c]		-1000	1000	1	0
rxn00776	4.2.1.70	R01055	(1.00)Uracil+(1.00)ribose-5-phosphate<=>(1.00)Pseudouridine_5-phosphate+(1.00)H2O	(1.00)cpd00092[c]+(1.00)cpd00101[c]<=>(1.00)cpd00859[c]+(1.00)cpd00001[c]		0	1000	0	0
rxn09110	2.7.8.5		(1.00)Glycerol-3-phosphate+(1.00)CDP-1,2-ditetradec-7-enoylglycerol<=>(1.00)Phosphatidylglycerophosphate_ditetradec-7-enoyl+(1.00)CMP	(1.00)cpd00080[c]+(1.00)cpd15422[c]<=>(1.00)cpd15544[c]+(1.00)cpd00046[c]		-1000	1000	1	0
rxn02832	4.2.1.-|4.2.1.113	R04031	(1.00)Succinylbenzoate+(1.00)H2O<=>(1.00)SHCHC	(1.00)cpd01772[c]+(1.00)cpd00001[c]<=>(1.00)cpd03451[c]		-1000	0	0	0
rxn09296	no match		(1.00)trdrd+(1.00)H2O2<=>(1.00)trdox+(2.00)H2O	(1.00)cpd11421[c]+(1.00)cpd00025[c]<=>(1.00)cpd11420[c]+(2.00)cpd00001[c]		0	1000	0	0
rxn12646	no match		(1.00)Gly-Gln+(1.00)H2O<=>(1.00)L-Glutamine+(1.00)Glycine	(1.00)cpd11580[c]+(1.00)cpd00001[c]<=>(1.00)cpd00053[c]+(1.00)cpd00033[c]		-1000	1000	1	0
rxn01255	4.2.3.5	R01714	(1.00)5-O-1-Carboxyvinyl-3-phosphoshikimate<=>(1.00)Phosphate+(1.00)H++(1.00)Chorismate	(1.00)cpd00932[c]<=>(1.00)cpd00009[c]+(1.00)cpd00067[c]+(1.00)cpd00216[c]		0	1000	0	0
rxn03194	2.2.1.6	R04673	(1.00)2-Oxobutyrate+(1.00)2-Hydroxyethyl-ThPP<=>(1.00)2-Aceto-2-hydroxybutanoate+(1.00)TPP	(1.00)cpd00094[c]+(1.00)cpd03049[c]<=>(1.00)cpd00498[c]+(1.00)cpd00056[c]		-1000	1000	1	0
rxn01360	1.3.3.1|1.3.99.11	R01867	(1.00)S-Dihydroorotate+(1.00)O2<=>(1.00)Orotate+(1.00)H2O2	(1.00)cpd00282[c]+(1.00)cpd00007[c]<=>(1.00)cpd00247[c]+(1.00)cpd00025[c]		0	1000	0	0
rxn03393	4.1.1.-	R04986	(1.00)H++(1.00)3-Octaprenyl-4-hydroxybenzoate<=>(1.00)CO2+(1.00)2-Octaprenylphenol	(1.00)cpd00067[c]+(1.00)cpd03443[c]<=>(1.00)cpd00011[c]+(1.00)cpd03444[c]		0	1000	0	0
rxn08552	2.3.1.15		(1.00)Octadecenoyl-ACP+(1.00)Glycerol-3-phosphate<=>(1.00)ACP+(1.00)1-octadec-11-enoyl-sn-glycerol_3-phosphate	(1.00)cpd11825[c]+(1.00)cpd00080[c]<=>(1.00)cpd11493[c]+(1.00)cpd15328[c]		0	1000	0	0
rxn05388	2.3.1.0		(1.00)H++(1.00)Malonyl-acyl-carrierprotein-+(1.00)5-methyl-hexanoyl-ACP<=>(1.00)ACP+(1.00)CO2+(1.00)7-methyl-3-oxo-octanoyl-ACP	(1.00)cpd00067[c]+(1.00)cpd11492[c]+(1.00)cpd11524[c]<=>(1.00)cpd11493[c]+(1.00)cpd00011[c]+(1.00)cpd11525[c]		0	1000	0	0
rxn10311	no match		(1.00)Anteisoheptadecanoyllipoteichoic_acid (n=24), linked, unsubstituted+(24.00)UDP-N-acetylglucosamine<=>(1.00)Anteisoheptadecanoyllipoteichoic_acid (n=24), linked, N-acetyl-D-glucosamine+(24.00)UDP	(1.00)cpd15750[c]+(24.00)cpd00037[c]<=>(1.00)cpd15768[c]+(24.00)cpd00014[c]		-1000	1000	1	0
rxn01486	2.5.1.29	R02061	(1.00)Isopentenyldiphosphate+(1.00)Farnesyldiphosphate<=>(1.00)Geranylgeranyl_diphosphate+(1.00)PPi	(1.00)cpd00113[c]+(1.00)cpd00350[c]<=>(1.00)cpd00289[c]+(1.00)cpd00012[c]		0	1000	0	0
rxn01453	1.1.1.36	R01977	(1.00)(R)-3-Hydroxybutanoyl-CoA+(1.00)NADP<=>(1.00)NADPH+(1.00)H++(1.00)Acetoacetyl-CoA	(1.00)cpd02234[c]+(1.00)cpd00006[c]<=>(1.00)cpd00005[c]+(1.00)cpd00067[c]+(1.00)cpd00279[c]		-1000	1000	1	0
rxn05464	1.3.1.0		(1.00)H++(1.00)NADH+(1.00)trans-Octodec-2-enoyl-ACP<=>(1.00)Octodecanoyl-ACP+(1.00)NAD	(1.00)cpd00067[c]+(1.00)cpd00004[c]+(1.00)cpd11572[c]<=>(1.00)cpd11573[c]+(1.00)cpd00003[c]		0	1000	0	0
rxn00178	2.3.1.9	R00238	(2.00)Acetyl-CoA<=>(1.00)CoA+(1.00)Acetoacetyl-CoA	(2.00)cpd00022[c]<=>(1.00)cpd00010[c]+(1.00)cpd00279[c]		-1000	1000	1	0
rxn10254	2.7.1.107		(1.00)1,2-Dianteisoheptadecanoyl-sn-glycerol+(1.00)ATP<=>(1.00)ADP+(1.00)1,2-dianteisoheptadecanoyl-sn-glycerol_3-phosphate	(1.00)cpd15702[c]+(1.00)cpd00002[c]<=>(1.00)cpd00008[c]+(1.00)cpd15678[c]		0	1000	1	0
rxn05545	3.A.1.5|3.|.1.5		(1.00)H2O+(1.00)ATP+(1.00)ala-L-Thr-L<=>(1.00)Phosphate+(1.00)H++(1.00)ADP+(1.00)ala-L-Thr-L	(1.00)cpd00001[c]+(1.00)cpd00002[c]+(1.00)cpd11582[e]<=>(1.00)cpd00009[c]+(1.00)cpd00067[c]+(1.00)cpd00008[c]+(1.00)cpd11582[c]		0	1000	0	0
rxn02339	2.6.1.1	R03266	(1.00)4-Hydroxy-L-glutamate+(1.00)2-Oxoglutarate<=>(1.00)4-Hydroxy-2-oxoglutarate+(1.00)L-Glutamate	(1.00)cpd01974[c]+(1.00)cpd00024[c]<=>(1.00)cpd00830[c]+(1.00)cpd00023[c]		-1000	1000	1	0
rxn03958	1.1.1.267	R05688	(1.00)2-C-methyl-D-erythritol4-phosphate+(1.00)NADP<=>(1.00)NADPH+(1.00)1-deoxy-D-xylulose5-phosphate+(1.00)H+	(1.00)cpd08286[c]+(1.00)cpd00006[c]<=>(1.00)cpd00005[c]+(1.00)cpd08289[c]+(1.00)cpd00067[c]		-1000	1000	1	0
rxn05429	2.3.1.0		(1.00)H++(1.00)Malonyl-acyl-carrierprotein-+(1.00)12-methyl-tridecanoyl-ACP<=>(1.00)14-methyl-3-oxo-pentadecanoyl-ACP+(1.00)ACP+(1.00)CO2	(1.00)cpd00067[c]+(1.00)cpd11492[c]+(1.00)cpd11565[c]<=>(1.00)cpd11566[c]+(1.00)cpd11493[c]+(1.00)cpd00011[c]		0	1000	0	0
rxn00713	2.7.1.48	R00968	(1.00)Uridine+(1.00)GTP<=>(1.00)UMP+(1.00)GDP	(1.00)cpd00249[c]+(1.00)cpd00038[c]<=>(1.00)cpd00091[c]+(1.00)cpd00031[c]		-1000	1000	1	0
rxn05359	2.3.1.0		(1.00)H++(1.00)Malonyl-acyl-carrierprotein-+(1.00)2-methylbutyryl-ACP<=>(1.00)4-methyl-3-oxo-hexanoyl-ACP+(1.00)ACP+(1.00)CO2	(1.00)cpd00067[c]+(1.00)cpd11492[c]+(1.00)cpd11495[c]<=>(1.00)cpd11496[c]+(1.00)cpd11493[c]+(1.00)cpd00011[c]		0	1000	0	0
rxn00898	no match	R01209	(1.00)2,3-Dihydroxy-isovalerate<=>(1.00)3-Methyl-2-oxobutanoate+(1.00)H2O	(1.00)cpd02498[c]<=>(1.00)cpd00123[c]+(1.00)cpd00001[c]		0	1000	0	0
rxn01739	2.7.1.71	R02412	(1.00)ATP+(1.00)Shikimate<=>(1.00)ADP+(1.00)3-phosphoshikimate	(1.00)cpd00002[c]+(1.00)cpd00383[c]<=>(1.00)cpd00008[c]+(1.00)cpd02030[c]		0	1000	1	0
rxn00288	1.3.99.1	R00408	(1.00)Succinate+(1.00)FAD<=>(1.00)FADH2+(1.00)Fumarate	(1.00)cpd00036[c]+(1.00)cpd00015[c]<=>(1.00)cpd00982[c]+(1.00)cpd00106[c]		-1000	0	0	0
rxn10203	2.3.1.15		(1.00)Glycerol-3-phosphate+(1.00)Myristoyl-CoA<=>(1.00)1-tetradecanoyl-sn-glycerol_3-phosphate+(1.00)CoA	(1.00)cpd00080[c]+(1.00)cpd01695[c]<=>(1.00)cpd15331[c]+(1.00)cpd00010[c]		0	1000	0	0
rxn00347	4.3.1.1	R00490	(1.00)L-Aspartate<=>(1.00)NH3+(1.00)Fumarate	(1.00)cpd00041[c]<=>(1.00)cpd00013[c]+(1.00)cpd00106[c]		-1000	1000	1	0
rxn00543	1.1.1.1	R00754	(1.00)Ethanol+(1.00)NAD<=>(1.00)H++(1.00)NADH+(1.00)Acetaldehyde	(1.00)cpd00363[c]+(1.00)cpd00003[c]<=>(1.00)cpd00067[c]+(1.00)cpd00004[c]+(1.00)cpd00071[c]		-1000	1000	1	0
rxn10052	2.7.4.3		(1.00)Triphosphate+(1.00)H++(1.00)AMP<=>(1.00)PPi+(1.00)ADP	(1.00)cpd00421[c]+(1.00)cpd00067[c]+(1.00)cpd00018[c]<=>(1.00)cpd00012[c]+(1.00)cpd00008[c]		-1000	1000	1	0
rxn05406	4.2.1.0		(1.00)15-methyl-3-hydroxy-hexa-decanoyl-ACP<=>(1.00)15-methyl-trans-hexa-dec-2-enoyl-ACP+(1.00)H2O	(1.00)cpd11542[c]<=>(1.00)cpd11543[c]+(1.00)cpd00001[c]		-1000	1000	1	0
rxn05206	1.A.1		(1.00)K+<=>(1.00)K+	(1.00)cpd00205[e]<=>(1.00)cpd00205[c]		-1000	1000	1	0
rxn05433	1.3.1.0		(1.00)4-methyl-trans-hex-2-enoyl-ACP+(1.00)H++(1.00)NADH<=>(1.00)4-methyl-hexanoyl-ACP+(1.00)NAD	(1.00)cpd11498[c]+(1.00)cpd00067[c]+(1.00)cpd00004[c]<=>(1.00)cpd11499[c]+(1.00)cpd00003[c]		0	1000	0	0
rxn01069	4.2.3.1	R01466	(1.00)H2O+(1.00)O-Phospho-L-homoserine<=>(1.00)Phosphate+(1.00)H++(1.00)L-Threonine	(1.00)cpd00001[c]+(1.00)cpd00809[c]<=>(1.00)cpd00009[c]+(1.00)cpd00067[c]+(1.00)cpd00161[c]		0	1000	0	0
rxn05322	1.3.1.9	R04429	(1.00)Butyryl-ACP+(1.00)NAD<=>(1.00)H++(1.00)But-2-enoyl-[acyl-carrier_protein]+(1.00)NADH	(1.00)cpd11464[c]+(1.00)cpd00003[c]<=>(1.00)cpd00067[c]+(1.00)cpd11465[c]+(1.00)cpd00004[c]		-1000	0	0	0
rxn00117	2.7.4.6	R00156	(1.00)UDP+(1.00)ATP<=>(1.00)ADP+(1.00)UTP	(1.00)cpd00014[c]+(1.00)cpd00002[c]<=>(1.00)cpd00008[c]+(1.00)cpd00062[c]		0	1000	1	0
rxn01997	4.2.1.46	R06513	(1.00)dTDPglucose<=>(1.00)dTDP-4-oxo-6-deoxy-D-glucose+(1.00)H2O	(1.00)cpd00626[c]<=>(1.00)cpd00521[c]+(1.00)cpd00001[c]		0	1000	0	0
rxn05373	4.2.1.0		(1.00)10-methyl-3-hydroxy-dodecanoyl-ACP<=>(1.00)10-methyl-trans-dodec-2-enoyl-ACP+(1.00)H2O	(1.00)cpd11509[c]<=>(1.00)cpd11510[c]+(1.00)cpd00001[c]		-1000	1000	1	0
rxn00102	4.2.1.1	R00132	(1.00)H2CO3+(1.00)H+<=>(1.00)H2O+(1.00)CO2	(1.00)cpd00242[c]+(1.00)cpd00067[c]<=>(1.00)cpd00001[c]+(1.00)cpd00011[c]		-1000	1000	1	0
rxn03236	4.2.1.96	R04734	(1.00)4a-Hydroxytetrahydrobiopterin<=>(1.00)Dihydrobiopterin+(1.00)H2O	(1.00)cpd03897[c]<=>(1.00)cpd00231[c]+(1.00)cpd00001[c]		-1000	1000	1	0
rxn01790	1.1.1.169	R02472	(1.00)Pantoate+(1.00)NADP<=>(1.00)NADPH+(1.00)H++(1.00)2-Dehydropantoate	(1.00)cpd00408[c]+(1.00)cpd00006[c]<=>(1.00)cpd00005[c]+(1.00)cpd00067[c]+(1.00)cpd00712[c]		-1000	1000	1	0
rxn00097	2.7.4.3	R00127	(1.00)ATP+(1.00)AMP<=>(2.00)ADP	(1.00)cpd00002[c]+(1.00)cpd00018[c]<=>(2.00)cpd00008[c]		0	1000	1	0
rxn05458	2.3.1.2		(1.00)hexadecanoyl-acp+(1.00)CoA<=>(1.00)Palmitoyl-CoA+(1.00)ACP	(1.00)cpd11476[c]+(1.00)cpd00010[c]<=>(1.00)cpd00134[c]+(1.00)cpd11493[c]		-1000	1000	1	0
rxn05465	2.3.1.39|2.3.1.85|2.3.1.86	R01626	(1.00)ACP+(1.00)Malonyl-CoA<=>(1.00)Malonyl-acyl-carrierprotein-+(1.00)CoA	(1.00)cpd11493[c]+(1.00)cpd00070[c]<=>(1.00)cpd11492[c]+(1.00)cpd00010[c]		-1000	1000	1	0
rxn05453	2.3.1.0		(1.00)13-methyl-tetra-decanoyl-ACP+(1.00)CoA<=>(1.00)fa3coa+(1.00)ACP	(1.00)cpd11540[c]+(1.00)cpd00010[c]<=>(1.00)cpd11437[c]+(1.00)cpd11493[c]		-1000	1000	1	0
rxn00555	2.6.1.16	R00768	(1.00)L-Glutamine+(1.00)D-fructose-6-phosphate<=>(1.00)D-Glucosamine_phosphate+(1.00)L-Glutamate	(1.00)cpd00053[c]+(1.00)cpd00072[c]<=>(1.00)cpd00288[c]+(1.00)cpd00023[c]		-1000	1000	1	0
rxn06591	1.2.1.70	R04109	(1.00)NADPH+(1.00)L-Glutamyl-tRNA-Glu+(1.00)H+<=>(1.00)L-Glutamate1-semialdehyde+(1.00)NADP+(1.00)tRNA-Glu	(1.00)cpd00005[c]+(1.00)cpd12227[c]+(1.00)cpd00067[c]<=>(1.00)cpd02345[c]+(1.00)cpd00006[c]+(1.00)cpd11912[c]		-1000	1000	1	0
rxn05541	3.A.1.5|3.|.1.5		(1.00)ala-L-glu-L+(1.00)H2O+(1.00)ATP<=>(1.00)ala-L-glu-L+(1.00)Phosphate+(1.00)H++(1.00)ADP	(1.00)cpd11586[e]+(1.00)cpd00001[c]+(1.00)cpd00002[c]<=>(1.00)cpd11586[c]+(1.00)cpd00009[c]+(1.00)cpd00067[c]+(1.00)cpd00008[c]		0	1000	0	0
rxn05528	3.A.3|3.|.3		(1.00)Cu2++(1.00)H2O+(1.00)ATP<=>(1.00)Phosphate+(1.00)Cu2++(1.00)H++(1.00)ADP	(1.00)cpd00058[c]+(1.00)cpd00001[c]+(1.00)cpd00002[c]<=>(1.00)cpd00009[c]+(1.00)cpd00058[e]+(1.00)cpd00067[c]+(1.00)cpd00008[c]		0	1000	0	0
rxn08298	2.7.1.107		(1.00)1,2-Diacyl-sn-glycerol_dihexadec-9-enoyl+(1.00)ATP<=>(1.00)ADP+(1.00)1,2-dihexadec-9-enoyl-sn-glycerol_3-phosphate	(1.00)cpd15310[c]+(1.00)cpd00002[c]<=>(1.00)cpd00008[c]+(1.00)cpd15525[c]		0	1000	1	0
rxn00747	5.3.1.1	R01015	(1.00)Glyceraldehyde3-phosphate<=>(1.00)Glycerone-phosphate	(1.00)cpd00102[c]<=>(1.00)cpd00095[c]		-1000	1000	1	0
rxn00126	2.5.1.6	R00177	(1.00)H2O+(1.00)L-Methionine+(1.00)ATP<=>(1.00)Phosphate+(1.00)PPi+(1.00)S-Adenosyl-L-methionine	(1.00)cpd00001[c]+(1.00)cpd00060[c]+(1.00)cpd00002[c]<=>(1.00)cpd00009[c]+(1.00)cpd00012[c]+(1.00)cpd00017[c]		0	1000	0	0
rxn00414	6.3.5.5	R00575	(1.00)L-Glutamine+(1.00)H2CO3+(1.00)H2O+(2.00)ATP<=>(1.00)Phosphate+(1.00)H++(2.00)ADP+(1.00)Carbamoylphosphate+(1.00)L-Glutamate	(1.00)cpd00053[c]+(1.00)cpd00242[c]+(1.00)cpd00001[c]+(2.00)cpd00002[c]<=>(1.00)cpd00009[c]+(1.00)cpd00067[c]+(2.00)cpd00008[c]+(1.00)cpd00146[c]+(1.00)cpd00023[c]		0	1000	0	0
rxn05547	3.A.1.5|3.|.1.5		(1.00)Gly-Gln+(1.00)H2O+(1.00)ATP<=>(1.00)Phosphate+(1.00)Gly-Gln+(1.00)H++(1.00)ADP	(1.00)cpd11580[e]+(1.00)cpd00001[c]+(1.00)cpd00002[c]<=>(1.00)cpd00009[c]+(1.00)cpd11580[c]+(1.00)cpd00067[c]+(1.00)cpd00008[c]		0	1000	0	0
rxn01967	5.4.2.6	R02728	(1.00)beta-D-Glucose_1-phosphate<=>(1.00)beta-D-Glucose_6-phosphate	(1.00)cpd00501[c]<=>(1.00)cpd00863[c]		-1000	1000	1	0
rxn06937	6.1.1.17|6.1.1.24	R05578	(1.00)H++(1.00)ATP+(1.00)L-Glutamate+(1.00)tRNA-Glu<=>(1.00)L-Glutamyl-tRNA-Glu+(1.00)PPi+(1.00)AMP	(1.00)cpd00067[c]+(1.00)cpd00002[c]+(1.00)cpd00023[c]+(1.00)cpd11912[c]<=>(1.00)cpd12227[c]+(1.00)cpd00012[c]+(1.00)cpd00018[c]		0	1000	0	0
rxn02359	1.5.1.12	R03295	(1.00)trans-4-Hydroxy-L-proline+(1.00)FAD<=>(1.00)FADH2+(1.00)3-Hydroxy-L-1-pyrroline-5-carboxylate	(1.00)cpd00851[c]+(1.00)cpd00015[c]<=>(1.00)cpd00982[c]+(1.00)cpd02625[c]		-1000	1000	1	0
rxn00260	2.6.1.1	R00355	(1.00)L-Aspartate+(1.00)2-Oxoglutarate<=>(1.00)Oxaloacetate+(1.00)L-Glutamate	(1.00)cpd00041[c]+(1.00)cpd00024[c]<=>(1.00)cpd00032[c]+(1.00)cpd00023[c]		-1000	1000	1	0
rxn00629	1.1.1.11|1.1.1.67	R00868	(1.00)D-Mannitol+(1.00)NAD<=>(1.00)H++(1.00)D-Fructose+(1.00)NADH	(1.00)cpd00314[c]+(1.00)cpd00003[c]<=>(1.00)cpd00067[c]+(1.00)cpd00082[c]+(1.00)cpd00004[c]		-1000	1000	1	0
rxn05538	3.A.1.5|3.|.1.5		(1.00)gly-pro-L+(1.00)H2O+(1.00)ATP<=>(1.00)Phosphate+(1.00)gly-pro-L+(1.00)H++(1.00)ADP	(1.00)cpd11588[e]+(1.00)cpd00001[c]+(1.00)cpd00002[c]<=>(1.00)cpd00009[c]+(1.00)cpd11588[c]+(1.00)cpd00067[c]+(1.00)cpd00008[c]		0	1000	0	0
rxn00479	1.13.12.3	R00679	(1.00)L-Tryptophan+(1.00)O2<=>(1.00)Indole-3-acetamide+(1.00)H2O+(1.00)CO2	(1.00)cpd00065[c]+(1.00)cpd00007[c]<=>(1.00)cpd01747[c]+(1.00)cpd00001[c]+(1.00)cpd00011[c]		0	1000	0	0
rxn00707	2.7.1.48	R00962	(1.00)Cytidine+(1.00)ITP<=>(1.00)CMP+(1.00)IDP	(1.00)cpd00367[c]+(1.00)cpd00068[c]<=>(1.00)cpd00046[c]+(1.00)cpd00090[c]		-1000	1000	1	0
rxn03893	2.5.1.-	R05615	(1.00)Farnesylfarnesylgeraniol+(1.00)4-Hydroxybenzoate<=>(1.00)PPi+(1.00)3-Octaprenyl-4-hydroxybenzoate	(1.00)cpd02557[c]+(1.00)cpd00136[c]<=>(1.00)cpd00012[c]+(1.00)cpd03443[c]		0	1000	0	0
rxn05452	2.3.1.0		(1.00)14-methyl-hexa-decanoyl-ACP+(1.00)CoA<=>(1.00)ACP+(1.00)fa12coa	(1.00)cpd11519[c]+(1.00)cpd00010[c]<=>(1.00)cpd11493[c]+(1.00)cpd11434[c]		-1000	1000	1	0
rxn02285	1.1.1.158	R03192	(1.00)NADP+(1.00)UDP-MurNAc<=>(1.00)UDP-N-acetylglucosamine_enolpyruvate+(1.00)NADPH+(1.00)H+	(1.00)cpd00006[c]+(1.00)cpd00773[c]<=>(1.00)cpd02820[c]+(1.00)cpd00005[c]+(1.00)cpd00067[c]		-1000	1000	1	0
rxn00980	3.1.3.18	R01334	(1.00)2-Phosphoglycolate+(1.00)H2O<=>(1.00)Phosphate+(1.00)Glycolate+(1.00)H+	(1.00)cpd00727[c]+(1.00)cpd00001[c]<=>(1.00)cpd00009[c]+(1.00)cpd00139[c]+(1.00)cpd00067[c]		0	1000	0	0
rxn02484	2.7.1.49	R03471	(1.00)Toxopyrimidine+(1.00)ATP<=>(1.00)4-Amino-5-phosphomethyl-2-methylpyrimidine+(1.00)ADP	(1.00)cpd00939[c]+(1.00)cpd00002[c]<=>(1.00)cpd02775[c]+(1.00)cpd00008[c]		0	1000	1	0
rxn03108	2.7.4.7	R04509	(1.00)4-Amino-5-phosphomethyl-2-methylpyrimidine+(1.00)ATP<=>(1.00)ADP+(1.00)4-Amino-2-methyl-5-diphosphomethylpyrimidine	(1.00)cpd02775[c]+(1.00)cpd00002[c]<=>(1.00)cpd00008[c]+(1.00)cpd02894[c]		0	1000	1	0
rxn10222	2.7.7.41		(1.00)1,2-diisotetradecanoyl-sn-glycerol_3-phosphate+(1.00)CTP<=>(1.00)CDP-1,2-diisotetradecanoylglycerol+(1.00)PPi	(1.00)cpd15679[c]+(1.00)cpd00052[c]<=>(1.00)cpd15685[c]+(1.00)cpd00012[c]		-1000	1000	1	0
rxn05337	1.1.1.100|2.3.1.85|2.3.1.86	R04953	(1.00)D-3-Hydroxyhexanoyl-[acp]+(1.00)NADP<=>(1.00)NADPH+(1.00)3-Oxohexanoyl-[acp]+(1.00)H+	(1.00)cpd11479[c]+(1.00)cpd00006[c]<=>(1.00)cpd00005[c]+(1.00)cpd11486[c]+(1.00)cpd00067[c]		-1000	1000	1	0
rxn03137	2.1.2.3	R04560	(1.00)AICAR+(1.00)10-Formyltetrahydrofolate<=>(1.00)Tetrahydrofolate+(1.00)FAICAR	(1.00)cpd02851[c]+(1.00)cpd00201[c]<=>(1.00)cpd00087[c]+(1.00)cpd02884[c]		-1000	1000	1	0
rxn00392	2.7.1.26	R00549	(1.00)ATP+(1.00)Riboflavin<=>(1.00)FMN+(1.00)ADP	(1.00)cpd00002[c]+(1.00)cpd00220[c]<=>(1.00)cpd00050[c]+(1.00)cpd00008[c]		0	1000	1	0
rxn03512	5.4.1.2	R05177	(1.00)H++(1.00)Precorrin_8<=>(1.00)Hydrogenobyrinate	(1.00)cpd00067[c]+(1.00)cpd03835[c]<=>(1.00)cpd03832[c]		-1000	1000	1	0
rxn05367	2.3.1.0		(1.00)H++(1.00)6-methyl-octanoyl-ACP+(1.00)Malonyl-acyl-carrierprotein-<=>(1.00)8-methyl-3-oxo-decanoyl-ACP+(1.00)ACP+(1.00)CO2	(1.00)cpd00067[c]+(1.00)cpd11503[c]+(1.00)cpd11492[c]<=>(1.00)cpd11504[c]+(1.00)cpd11493[c]+(1.00)cpd00011[c]		0	1000	0	0
rxn05365	4.2.1.0		(1.00)6-methyl-3-hydroxy-octanoyl-ACP<=>(1.00)6-methyl-trans-oct-2-enoyl-ACP+(1.00)H2O	(1.00)cpd11501[c]<=>(1.00)cpd11502[c]+(1.00)cpd00001[c]		-1000	1000	1	0
rxn10213	2.3.1.51		(1.00)strcoa+(1.00)1-octadecanoyl-sn-glycerol_3-phosphate<=>(1.00)1,2-dioctadecanoyl-sn-glycerol_3-phosphate+(1.00)CoA	(1.00)cpd00327[c]+(1.00)cpd15329[c]<=>(1.00)cpd15526[c]+(1.00)cpd00010[c]		0	1000	0	0
rxn00758	3.1.4.2|3.1.4.46	R01030	(1.00)H2O+(1.00)Glycerophosphocholine<=>(1.00)Choline+(1.00)Glycerol-3-phosphate	(1.00)cpd00001[c]+(1.00)cpd00507[c]<=>(1.00)cpd00098[c]+(1.00)cpd00080[c]		0	1000	0	0
rxn00527	2.6.1.1|2.6.1.9	R00734	(1.00)2-Oxoglutarate+(1.00)L-Tyrosine<=>(1.00)p-hydroxyphenylpyruvate+(1.00)L-Glutamate	(1.00)cpd00024[c]+(1.00)cpd00069[c]<=>(1.00)cpd00868[c]+(1.00)cpd00023[c]		-1000	1000	1	0
rxn00328	4.1.3.16|4.1.1.3|4.1.2.14	R00470	(1.00)4-Hydroxy-2-oxoglutarate<=>(1.00)Pyruvate+(1.00)Glyoxalate	(1.00)cpd00830[c]<=>(1.00)cpd00020[c]+(1.00)cpd00040[c]		-1000	1000	1	0
rxn04052	5.4.1.2	R05814	(1.00)Cobalt-precorrin_8<=>(1.00)Cobyrinate	(1.00)cpd08375[c]<=>(1.00)cpd03421[c]		-1000	1000	1	0
rxn10118	no match		(2.00)H++(1.00)Ubiquinone-8+(1.00)H2<=>(2.00)H++(1.00)Ubiquinol-8	(2.00)cpd00067[c]+(1.00)cpd15560[c]+(1.00)cpd11640[c]<=>(2.00)cpd00067[e]+(1.00)cpd15561[c]		0	0	0	0
rxn05380	1.1.1.0		(1.00)NADPH+(1.00)14-methyl-3-oxo-hexa-decanoyl-ACP+(1.00)H+<=>(1.00)14-methyl-3-hydroxy-hexa-decanoyl-ACP+(1.00)NADP	(1.00)cpd00005[c]+(1.00)cpd11516[c]+(1.00)cpd00067[c]<=>(1.00)cpd11517[c]+(1.00)cpd00006[c]		-1000	1000	1	0
rxn08549	2.3.1.15		(1.00)Palmitoyl-ACP+(1.00)Glycerol-3-phosphate<=>(1.00)1-hexadecanoyl-sn-glycerol_3-phosphate+(1.00)ACP	(1.00)cpd15277[c]+(1.00)cpd00080[c]<=>(1.00)cpd15327[c]+(1.00)cpd11493[c]		0	1000	0	0
rxn00237	2.7.4.6	R00330	(1.00)ATP+(1.00)GDP<=>(1.00)ADP+(1.00)GTP	(1.00)cpd00002[c]+(1.00)cpd00031[c]<=>(1.00)cpd00008[c]+(1.00)cpd00038[c]		0	1000	1	0
rxn05517	no match		(1.00)H++(1.00)K++(1.00)Cd2+<=>(1.00)H++(1.00)K++(1.00)Cd2+	(1.00)cpd00067[e]+(1.00)cpd00205[e]+(1.00)cpd01012[c]<=>(1.00)cpd00067[c]+(1.00)cpd00205[c]+(1.00)cpd01012[e]		-1000	1000	1	0
rxn10312	no match		(24.00)UDP-N-acetylglucosamine+(1.00)Isotetradecanoyllipoteichoic_acid (n=24), linked, unsubstituted<=>(1.00)Isotetradecanoyllipoteichoic_acid (n=24), linked, N-acetyl-D-glucosamine+(24.00)UDP	(24.00)cpd00037[c]+(1.00)cpd15751[c]<=>(1.00)cpd15769[c]+(24.00)cpd00014[c]		-1000	1000	1	0
rxn00355	2.7.7.10	R00502	(1.00)D-Galactose_1-phosphate+(1.00)UTP<=>(1.00)UDP-galactose+(1.00)PPi	(1.00)cpd00348[c]+(1.00)cpd00062[c]<=>(1.00)cpd00043[c]+(1.00)cpd00012[c]		-1000	1000	1	0
rxn00548	4.1.2.9|4.1.2.22	R00761	(1.00)Phosphate+(1.00)H++(1.00)D-fructose-6-phosphate<=>(1.00)Acetylphosphate+(1.00)H2O+(1.00)D-Erythrose4-phosphate	(1.00)cpd00009[c]+(1.00)cpd00067[c]+(1.00)cpd00072[c]<=>(1.00)cpd00196[c]+(1.00)cpd00001[c]+(1.00)cpd00236[c]		0	1000	0	0
rxn13783	no match		nothing<=>(1.00)DNA_replication	nothing<=>(1.00)cpd17042[c]		0	1000	0	0
rxn08126	no match		(1.00)Amylotriose+(1.00)Maltose<=>(1.00)Maltotetraose+(1.00)D-Glucose	(1.00)cpd01262[c]+(1.00)cpd00179[c]<=>(1.00)cpd01399[c]+(1.00)cpd00027[c]		-1000	1000	1	0
rxn04045	4.99.1.3	R05807	(2.00)H++(1.00)Sirohydrochlorin+(1.00)Co2+<=>(1.00)Cobalt-precorrin_2	(2.00)cpd00067[c]+(1.00)cpd03426[c]+(1.00)cpd00149[c]<=>(1.00)cpd08368[c]		-1000	1000	1	0
rxn05331	2.3.1.85|2.3.1.86|4.2.1.58|4.2.1.60|4.2.1.61	R04965	(1.00)D-3-Hydroxydodecanoyl-[acp]<=>(1.00)(2E)-Dodecenoyl-[acp]+(1.00)H2O	(1.00)cpd11480[c]<=>(1.00)cpd11469[c]+(1.00)cpd00001[c]		-1000	1000	1	0
rxn00420	3.1.3.3	R00582	(1.00)phosphoserine+(1.00)H2O<=>(1.00)Phosphate+(1.00)H++(1.00)L-Serine	(1.00)cpd00738[c]+(1.00)cpd00001[c]<=>(1.00)cpd00009[c]+(1.00)cpd00067[c]+(1.00)cpd00054[c]		0	1000	0	0
rxn05546	3.A.1.5|3.|.1.5		(1.00)H2O+(1.00)gly-asn-L+(1.00)ATP<=>(1.00)Phosphate+(1.00)H++(1.00)gly-asn-L+(1.00)ADP	(1.00)cpd00001[c]+(1.00)cpd11581[e]+(1.00)cpd00002[c]<=>(1.00)cpd00009[c]+(1.00)cpd00067[c]+(1.00)cpd11581[c]+(1.00)cpd00008[c]		0	1000	0	0
rxn05336	1.1.1.100|2.3.1.85|2.3.1.86	R04543	(1.00)R-3-hydroxypalmitoyl-acyl-carrierprotein-+(1.00)NADP<=>(1.00)NADPH+(1.00)3-oxohexadecanoyl-acp+(1.00)H+	(1.00)cpd11481[c]+(1.00)cpd00006[c]<=>(1.00)cpd00005[c]+(1.00)cpd11485[c]+(1.00)cpd00067[c]		-1000	1000	1	0
rxn02287	2.1.1.107	R03194	(2.00)S-Adenosyl-L-methionine+(1.00)UroporphyrinogenIII<=>(2.00)H++(1.00)Precorrin_2+(2.00)S-Adenosyl-homocysteine	(2.00)cpd00017[c]+(1.00)cpd00774[c]<=>(2.00)cpd00067[c]+(1.00)cpd01620[c]+(2.00)cpd00019[c]		-1000	1000	1	0
rxn02475	3.5.4.26	R03459	(1.00)H++(1.00)H2O+(1.00)2,5-Diamino-6-(5-phosphoribosylamino)-4-pyrimidineone<=>(1.00)NH3+(1.00)5-Amino-6-5-phosphoribosylaminouracil	(1.00)cpd00067[c]+(1.00)cpd00001[c]+(1.00)cpd00957[c]<=>(1.00)cpd00013[c]+(1.00)cpd00931[c]		0	1000	0	0
rxn02508	5.3.1.24	R03509	(1.00)N-5-phosphoribosyl-anthranilate<=>(1.00)1-(2-carboxyphenylamino)-1-deoxyribulose_5-phosphate	(1.00)cpd02642[c]<=>(1.00)cpd00956[c]		-1000	1000	1	0
rxn00001	3.6.1.1	R00004	(1.00)H2O+(1.00)PPi<=>(2.00)Phosphate+(2.00)H+	(1.00)cpd00001[c]+(1.00)cpd00012[c]<=>(2.00)cpd00009[c]+(2.00)cpd00067[c]		0	1000	0	0
rxn09111	2.7.8.5		(1.00)Glycerol-3-phosphate+(1.00)CDP-1,2-dihexadecanoylglycerol<=>(1.00)Phosphatidylglycerophosphate_dihexadecanoyl+(1.00)CMP	(1.00)cpd00080[c]+(1.00)cpd15419[c]<=>(1.00)cpd15545[c]+(1.00)cpd00046[c]		-1000	1000	1	0
rxn09188	no match		(1.00)L-Proline+(1.00)FAD<=>(1.00)FADH2+(1.00)1-Pyrroline-5-carboxylate	(1.00)cpd00129[c]+(1.00)cpd00015[c]<=>(1.00)cpd00982[c]+(1.00)cpd02431[c]		-1000	1000	1	0
rxn01476	3.1.1.31	R02035	(1.00)H2O+(1.00)6-phospho-D-glucono-1-5-lactone<=>(1.00)6-Phospho-D-gluconate+(1.00)H+	(1.00)cpd00001[c]+(1.00)cpd00911[c]<=>(1.00)cpd00284[c]+(1.00)cpd00067[c]		0	1000	0	0
rxn10313	no match		(24.00)UDP-N-acetylglucosamine+(1.00)Isopentadecanoyllipoteichoic_acid (n=24), linked, unsubstituted<=>(24.00)UDP+(1.00)Isopentadecanoyllipoteichoic_acid (n=24), linked, N-acetyl-D-glucosamine	(24.00)cpd00037[c]+(1.00)cpd15752[c]<=>(24.00)cpd00014[c]+(1.00)cpd15770[c]		-1000	1000	1	0
rxn00127	4.1.1.50	R00178	(1.00)H++(1.00)S-Adenosyl-L-methionine<=>(1.00)S-Adenosylmethioninamine+(1.00)CO2	(1.00)cpd00067[c]+(1.00)cpd00017[c]<=>(1.00)cpd00837[c]+(1.00)cpd00011[c]		0	1000	0	0
rxn00147	2.7.9.2	R00199	(1.00)Pyruvate+(1.00)H2O+(1.00)ATP<=>(1.00)Phosphate+(1.00)H++(1.00)Phosphoenolpyruvate+(1.00)AMP	(1.00)cpd00020[c]+(1.00)cpd00001[c]+(1.00)cpd00002[c]<=>(1.00)cpd00009[c]+(1.00)cpd00067[c]+(1.00)cpd00061[c]+(1.00)cpd00018[c]		0	1000	0	0
rxn08295	2.7.1.107		(1.00)1,2-Diacyl-sn-glycerol_ditetradecanoyl+(1.00)ATP<=>(1.00)ADP+(1.00)1,2-ditetradecanoyl-sn-glycerol_3-phosphate	(1.00)cpd15307[c]+(1.00)cpd00002[c]<=>(1.00)cpd00008[c]+(1.00)cpd15522[c]		0	1000	1	0
rxn00058	1.9.3.1	R00081	(4.00)Cytochrome_c2++(4.00)H++(1.00)O2<=>(2.00)H2O+(4.00)Cytochrome_c3+	(4.00)cpd00110[c]+(4.00)cpd00067[c]+(1.00)cpd00007[c]<=>(2.00)cpd00001[c]+(4.00)cpd00109[c]		-1000	1000	1	0
rxn01974	5.1.1.7	R02735	(1.00)LL-2,6-Diaminopimelate<=>(1.00)meso-2,6-Diaminopimelate	(1.00)cpd00504[c]<=>(1.00)cpd00516[c]		-1000	1000	1	0
rxn02003	1.1.1.133	R02777	(1.00)dTDP-rhamnose+(1.00)NADP<=>(1.00)NADPH+(1.00)H++(1.00)dTDP-4-oxo-L-rhamnose	(1.00)cpd02113[c]+(1.00)cpd00006[c]<=>(1.00)cpd00005[c]+(1.00)cpd00067[c]+(1.00)cpd00522[c]		-1000	1000	1	0
rxn01644	4.2.1.52	R02292	(1.00)L-Aspartate4-semialdehyde+(1.00)Pyruvate<=>(1.00)H++(2.00)H2O+(1.00)Dihydrodipicolinate	(1.00)cpd00346[c]+(1.00)cpd00020[c]<=>(1.00)cpd00067[c]+(2.00)cpd00001[c]+(1.00)cpd02120[c]		0	1000	0	0
rxn05312	2.A.20|2.|.20		(1.00)Phosphate+(1.00)H+<=>(1.00)Phosphate+(1.00)H+	(1.00)cpd00009[e]+(1.00)cpd00067[e]<=>(1.00)cpd00009[c]+(1.00)cpd00067[c]		-1000	0	0	0
rxn06723	2.3.1.-	R04550	(1.00)H++(1.00)UDP-2,3-bis(3-hydroxytetradecanoyl)glucosamine+(1.00)ACP<=>(1.00)HMA+(1.00)UDP-3-O-(beta-hydroxymyristoyl)-D-glucosamine	(1.00)cpd00067[c]+(1.00)cpd02835[c]+(1.00)cpd11493[c]<=>(1.00)cpd11484[c]+(1.00)cpd03584[c]		-1000	0	0	0
rxn01108	1.1.1.47	R01520	(1.00)beta-D-Glucose+(1.00)NAD<=>(1.00)H++(1.00)NADH+(1.00)Gluconolactone	(1.00)cpd00190[c]+(1.00)cpd00003[c]<=>(1.00)cpd00067[c]+(1.00)cpd00004[c]+(1.00)cpd00170[c]		-1000	1000	1	0
rxn01274	3.1.2.6	R01736	(1.00)(R)-S-Lactoylglutathione+(1.00)H2O<=>(1.00)GSH+(1.00)D-Lactate+(1.00)H+	(1.00)cpd02182[c]+(1.00)cpd00001[c]<=>(1.00)cpd00042[c]+(1.00)cpd00221[c]+(1.00)cpd00067[c]		0	1000	0	0
rxn05251	6.2.1.3		(1.00)H++(1.00)ATP+(1.00)CoA+(1.00)fa12<=>(1.00)PPi+(1.00)fa12coa+(1.00)AMP	(1.00)cpd00067[c]+(1.00)cpd00002[c]+(1.00)cpd00010[c]+(1.00)cpd11433[c]<=>(1.00)cpd00012[c]+(1.00)cpd11434[c]+(1.00)cpd00018[c]		0	1000	0	0
rxn12645	no match		(1.00)H2O+(1.00)gly-asn-L<=>(1.00)L-Asparagine+(1.00)Glycine	(1.00)cpd00001[c]+(1.00)cpd11581[c]<=>(1.00)cpd00132[c]+(1.00)cpd00033[c]		-1000	1000	1	0
rxn02774	1.3.1.76|2.1.1.107	R03947	(1.00)Precorrin_2+(1.00)NAD<=>(1.00)H++(1.00)Sirohydrochlorin+(1.00)NADH	(1.00)cpd01620[c]+(1.00)cpd00003[c]<=>(1.00)cpd00067[c]+(1.00)cpd03426[c]+(1.00)cpd00004[c]		-1000	1000	1	0
rxn05325	1.3.1.9	R04958	(1.00)Octanoyl-ACP+(1.00)NAD<=>(1.00)H++(1.00)NADH+(1.00)(2E)-Octenoyl-[acp]	(1.00)cpd11470[c]+(1.00)cpd00003[c]<=>(1.00)cpd00067[c]+(1.00)cpd00004[c]+(1.00)cpd11471[c]		-1000	0	0	0
rxn05516	3.A.3|3.|.3		(1.00)H2O+(1.00)Cd2++(1.00)ATP<=>(1.00)Phosphate+(1.00)H++(1.00)Cd2++(1.00)ADP	(1.00)cpd00001[c]+(1.00)cpd01012[c]+(1.00)cpd00002[c]<=>(1.00)cpd00009[c]+(1.00)cpd00067[c]+(1.00)cpd01012[e]+(1.00)cpd00008[c]		0	1000	0	0
rxn05104	4.2.1.109	R07392	(1.00)methylthioribulose-1-phosphate<=>(1.00)H2O+(1.00)2,3-diketo5-methylthio-1-phosphopentane	(1.00)cpd02791[c]<=>(1.00)cpd00001[c]+(1.00)cpd11295[c]		0	1000	0	0
rxn03057	5.3.1.23	R04420	(1.00)methylthioribose-1-phosphate<=>(1.00)methylthioribulose-1-phosphate	(1.00)cpd02574[c]<=>(1.00)cpd02791[c]		-1000	1000	1	0
rxn07438	1.8.4.12	R07607	(1.00)trdox+(1.00)Peptide-L-methionine+(1.00)H2O<=>(1.00)Peptide-L-methionine_(R)-S-oxide+(1.00)trdrd	(1.00)cpd11420[c]+(1.00)cpd12237[c]+(1.00)cpd00001[c]<=>(1.00)cpd14507[c]+(1.00)cpd11421[c]		-1000	1000	1	0
rxn05608	no match		(1.00)Amylotriose+(1.00)H2O+(1.00)ATP<=>(1.00)Phosphate+(1.00)Amylotriose+(1.00)H++(1.00)ADP	(1.00)cpd01262[e]+(1.00)cpd00001[c]+(1.00)cpd00002[c]<=>(1.00)cpd00009[c]+(1.00)cpd01262[c]+(1.00)cpd00067[c]+(1.00)cpd00008[c]		0	1000	0	0
rxn02938	4.1.1.21	R04209	(1.00)H++(1.00)5-Phosphoribosyl-4-carboxy-5-aminoimidazole<=>(1.00)AIR+(1.00)CO2	(1.00)cpd00067[c]+(1.00)cpd02893[c]<=>(1.00)cpd02140[c]+(1.00)cpd00011[c]		0	1000	0	0
rxn02008	6.3.2.9	R02783	(1.00)UDP-N-acetylmuramoyl-L-alanine+(1.00)D-Glutamate+(1.00)ATP<=>(1.00)Phosphate+(1.00)H++(1.00)UDP-N-acetylmuramoyl-L-alanyl-D-glutamate+(1.00)ADP	(1.00)cpd00890[c]+(1.00)cpd00186[c]+(1.00)cpd00002[c]<=>(1.00)cpd00009[c]+(1.00)cpd00067[c]+(1.00)cpd00525[c]+(1.00)cpd00008[c]		0	1000	0	0
rxn05439	1.3.1.0		(1.00)H++(1.00)NADH+(1.00)5-methyl-trans-hex-2-enoyl-ACP<=>(1.00)NAD+(1.00)5-methyl-hexanoyl-ACP	(1.00)cpd00067[c]+(1.00)cpd00004[c]+(1.00)cpd11523[c]<=>(1.00)cpd00003[c]+(1.00)cpd11524[c]		0	1000	0	0
rxn01256	5.4.99.5	R01715	(1.00)Chorismate<=>(1.00)Prephenate	(1.00)cpd00216[c]<=>(1.00)cpd00219[c]		0	1000	0	0
rxn08336	no match		(1.00)S-Dihydroorotate+(1.00)Menaquinone_8<=>(1.00)Orotate+(1.00)Menaquinol_8	(1.00)cpd00282[c]+(1.00)cpd15500[c]<=>(1.00)cpd00247[c]+(1.00)cpd15499[c]		0	1000	0	0
rxn05385	1.1.1.0		(1.00)NADPH+(1.00)H++(1.00)5-methyl-3-oxo-hexanoyl-ACP<=>(1.00)NADP+(1.00)5-methyl-3-hydroxy-hexanoyl-ACP	(1.00)cpd00005[c]+(1.00)cpd00067[c]+(1.00)cpd11521[c]<=>(1.00)cpd00006[c]+(1.00)cpd11522[c]		-1000	1000	1	0
rxn05339	1.1.1.100|2.3.1.85|2.3.1.86	R04533	(1.00)(R)-3-Hydroxybutanoyl-[acyl-carrier_protein]+(1.00)NADP<=>(1.00)NADPH+(1.00)Acetoacetyl-ACP+(1.00)H+	(1.00)cpd11478[c]+(1.00)cpd00006[c]<=>(1.00)cpd00005[c]+(1.00)cpd11488[c]+(1.00)cpd00067[c]		-1000	1000	1	0
rxn04162	1.3.1.33	R06286	(1.00)NADP+(1.00)Divinyl_chlorophyllide a<=>(1.00)NADPH+(2.00)H++(1.00)Divinylprotochlorophyllide	(1.00)cpd00006[c]+(1.00)cpd08632[c]<=>(1.00)cpd00005[c]+(2.00)cpd00067[c]+(1.00)cpd08631[c]		-1000	1000	1	0
rxn02898	4.1.3.36	R04150	(1.00)Succinylbenzoyl-CoA<=>(1.00)1-4-Dihydroxy-2-naphthoate+(1.00)CoA	(1.00)cpd02021[c]<=>(1.00)cpd02295[c]+(1.00)cpd00010[c]		0	1000	0	0
rxn05443	1.3.1.0		(1.00)H++(1.00)13-methyl-trans-tetra-dec-2-enoyl-ACP+(1.00)NADH<=>(1.00)13-methyl-tetra-decanoyl-ACP+(1.00)NAD	(1.00)cpd00067[c]+(1.00)cpd11539[c]+(1.00)cpd00004[c]<=>(1.00)cpd11540[c]+(1.00)cpd00003[c]		0	1000	0	0
rxn01210	6.3.2.12|6.3.2.17	R01654	(1.00)ATP+(1.00)L-Glutamate+(1.00)10-Formyltetrahydrofolate<=>(1.00)Phosphate+(1.00)10-Formyl-THF-L-glutamate+(1.00)H++(1.00)ADP	(1.00)cpd00002[c]+(1.00)cpd00023[c]+(1.00)cpd00201[c]<=>(1.00)cpd00009[c]+(1.00)cpd03524[c]+(1.00)cpd00067[c]+(1.00)cpd00008[c]		0	1000	0	0
rxn02155	2.7.7.1|2.7.7.18	R03005	(1.00)ATP+(1.00)Nicotinate_ribonucleotide<=>(1.00)Deamido-NAD+(1.00)PPi	(1.00)cpd00002[c]+(1.00)cpd00873[c]<=>(1.00)cpd00638[c]+(1.00)cpd00012[c]		0	1000	1	0
rxn03408	2.4.1.227	R05032	(1.00)UDP-N-acetylglucosamine+(1.00)Undecaprenyl-diphospho-N-acetylmuramoyl-L-alanyl-D-glutamyl-meso-2-6-diaminopimeloyl-D-alanyl-D-alanine<=>(1.00)UDP+(1.00)Undecaprenyl-diphospho-N-acetylmuramoyl-N-acetylglucosamine-L-ala-D-glu-meso-2-6-diaminopimeloyl-D-ala-D-ala	(1.00)cpd00037[c]+(1.00)cpd03494[c]<=>(1.00)cpd00014[c]+(1.00)cpd03495[c]		-1000	1000	1	0
rxn00299	3.5.4.16	R00424	(1.00)H2O+(1.00)GTP<=>(1.00)7,8-Dihydroneopterin_3-triphosphate+(1.00)H++(1.00)Formate	(1.00)cpd00001[c]+(1.00)cpd00038[c]<=>(1.00)cpd02978[c]+(1.00)cpd00067[c]+(1.00)cpd00047[c]		0	1000	0	0
rxn05514	2.A.19|2.|.19		(1.00)H++(1.00)Ca2+<=>(1.00)H++(1.00)Ca2+	(1.00)cpd00067[e]+(1.00)cpd00063[c]<=>(1.00)cpd00067[c]+(1.00)cpd00063[e]		-1000	1000	1	0
rxn00224	4.99.1.1	R00310	(1.00)Fe2++(1.00)Protoporphyrin<=>(2.00)H++(1.00)Heme	(1.00)cpd10515[c]+(1.00)cpd01476[c]<=>(2.00)cpd00067[c]+(1.00)cpd00028[c]		-1000	1000	1	0
rxn00839	2.7.4.6	R01137	(1.00)dADP+(1.00)ATP<=>(1.00)ADP+(1.00)dATP	(1.00)cpd00177[c]+(1.00)cpd00002[c]<=>(1.00)cpd00008[c]+(1.00)cpd00115[c]		0	1000	1	0
rxn00569	1.7.1.4		(1.00)NH3+(2.00)H2O+(3.00)NADP<=>(3.00)NADPH+(1.00)Nitrite+(5.00)H+	(1.00)cpd00013[c]+(2.00)cpd00001[c]+(3.00)cpd00006[c]<=>(3.00)cpd00005[c]+(1.00)cpd00075[c]+(5.00)cpd00067[c]		-1000	0	0	0
rxn00461	2.5.1.7	R00660	(1.00)UDP-N-acetylglucosamine+(1.00)Phosphoenolpyruvate<=>(1.00)UDP-N-acetylglucosamine_enolpyruvate+(1.00)Phosphate+(1.00)H+	(1.00)cpd00037[c]+(1.00)cpd00061[c]<=>(1.00)cpd02820[c]+(1.00)cpd00009[c]+(1.00)cpd00067[c]		-1000	1000	1	0
rxn10220	2.7.7.41		(1.00)1,2-diisoheptadecanoyl-sn-glycerol_3-phosphate+(1.00)CTP<=>(1.00)PPi+(1.00)CDP-1,2-diisoheptadecanoylglycerol	(1.00)cpd15677[c]+(1.00)cpd00052[c]<=>(1.00)cpd00012[c]+(1.00)cpd15683[c]		-1000	1000	1	0
rxn00139	2.4.2.7|2.4.2.8	R00190	(1.00)PPi+(1.00)AMP<=>(1.00)Adenine+(1.00)PRPP	(1.00)cpd00012[c]+(1.00)cpd00018[c]<=>(1.00)cpd00128[c]+(1.00)cpd00103[c]		-1000	0	0	0
rxn03907	2.7.7.60	R05633	(1.00)2-C-methyl-D-erythritol4-phosphate+(1.00)CTP<=>(1.00)4-cytidine5-diphospho-2-C-methyl-D-erythritol+(1.00)PPi	(1.00)cpd08286[c]+(1.00)cpd00052[c]<=>(1.00)cpd08287[c]+(1.00)cpd00012[c]		-1000	1000	1	0
rxn03395	2.1.1.64	R04988	(1.00)2-Octaprenyl-6-hydroxyphenol+(1.00)S-Adenosyl-L-methionine<=>(1.00)2-Octaprenyl-6-methoxyphenol+(1.00)H++(1.00)S-Adenosyl-homocysteine	(1.00)cpd03445[c]+(1.00)cpd00017[c]<=>(1.00)cpd03446[c]+(1.00)cpd00067[c]+(1.00)cpd00019[c]		-1000	1000	1	0
rxn02304	1.3.3.4	R03222	(2.00)ProtoporphyrinogenIX+(3.00)O2<=>(6.00)H2O+(2.00)Protoporphyrin	(2.00)cpd00791[c]+(3.00)cpd00007[c]<=>(6.00)cpd00001[c]+(2.00)cpd01476[c]		-1000	1000	1	0
rxn05451	2.3.1.0		(1.00)12-methyl-tetra-decanoyl-ACP+(1.00)CoA<=>(1.00)ACP+(1.00)fa4coa	(1.00)cpd11515[c]+(1.00)cpd00010[c]<=>(1.00)cpd11493[c]+(1.00)cpd11439[c]		-1000	1000	1	0
rxn05736	6.2.1.3		(1.00)Myristic_acid+(1.00)H++(1.00)ATP+(1.00)CoA<=>(1.00)PPi+(1.00)AMP+(1.00)Myristoyl-CoA	(1.00)cpd03847[c]+(1.00)cpd00067[c]+(1.00)cpd00002[c]+(1.00)cpd00010[c]<=>(1.00)cpd00012[c]+(1.00)cpd00018[c]+(1.00)cpd01695[c]		0	1000	0	0
rxn01485	5.4.2.10	R02060	(1.00)D-Glucosamine1-phosphate<=>(1.00)D-Glucosamine_phosphate	(1.00)cpd03671[c]<=>(1.00)cpd00288[c]		-1000	1000	1	0
rxn08089	2.3.1.51		(1.00)Octadecenoyl-ACP+(1.00)1-octadec-11-enoyl-sn-glycerol_3-phosphate<=>(1.00)1,2-dioctadec-11-enoyl-sn-glycerol_3-phosphate+(1.00)ACP	(1.00)cpd11825[c]+(1.00)cpd15328[c]<=>(1.00)cpd15527[c]+(1.00)cpd11493[c]		0	1000	0	0
rxn10253	2.7.1.107		(1.00)1,2-Diisoheptadecanoyl-sn-glycerol+(1.00)ATP<=>(1.00)1,2-diisoheptadecanoyl-sn-glycerol_3-phosphate+(1.00)ADP	(1.00)cpd15701[c]+(1.00)cpd00002[c]<=>(1.00)cpd15677[c]+(1.00)cpd00008[c]		0	1000	1	0
rxn13784	no match		nothing<=>(1.00)RNA_transcription	nothing<=>(1.00)cpd17043[c]		0	1000	0	0
rxn00792	6.2.1.11|6.3.4.9|6.3.4.10|6.3.4.11|6.3.4.15	R01074	(1.00)H++(1.00)BIOT+(1.00)ATP<=>(1.00)Biotinyl-5-AMP+(1.00)PPi	(1.00)cpd00067[c]+(1.00)cpd00104[c]+(1.00)cpd00002[c]<=>(1.00)cpd03517[c]+(1.00)cpd00012[c]		-1000	0	0	0
rxn00283	5.1.1.1	R00401	(1.00)L-Alanine<=>(1.00)D-Alanine	(1.00)cpd00035[c]<=>(1.00)cpd00117[c]		-1000	1000	1	0
rxn05434	1.3.1.0		(1.00)H++(1.00)6-methyl-trans-oct-2-enoyl-ACP+(1.00)NADH<=>(1.00)6-methyl-octanoyl-ACP+(1.00)NAD	(1.00)cpd00067[c]+(1.00)cpd11502[c]+(1.00)cpd00004[c]<=>(1.00)cpd11503[c]+(1.00)cpd00003[c]		0	1000	0	0
rxn00931	1.5.1.2	R01251	(1.00)L-Proline+(1.00)NADP<=>(1.00)NADPH+(1.00)H++(1.00)1-Pyrroline-5-carboxylate	(1.00)cpd00129[c]+(1.00)cpd00006[c]<=>(1.00)cpd00005[c]+(1.00)cpd00067[c]+(1.00)cpd02431[c]		-1000	1000	1	0
rxn01517	2.7.4.9	R02098	(1.00)dUMP+(1.00)ATP<=>(1.00)ADP+(1.00)dUDP	(1.00)cpd00299[c]+(1.00)cpd00002[c]<=>(1.00)cpd00008[c]+(1.00)cpd00978[c]		0	1000	1	0
rxn03904	2.7.8.13	R05630	(1.00)UDP-N-acetylmuramoyl-L-alanyl-D-glutamyl-6-carboxy-L-lysyl-D-alanyl-_D-alanine+(1.00)Undecaprenylphosphate<=>(1.00)UMP+(1.00)Undecaprenyl-diphospho-N-acetylmuramoyl-L-alanyl-D-glutamyl-meso-2-6-diaminopimeloyl-D-alanyl-D-alanine	(1.00)cpd02968[c]+(1.00)cpd00286[c]<=>(1.00)cpd00091[c]+(1.00)cpd03494[c]		-1000	1000	1	0
rxn01987	2.7.1.15	R02750	(1.00)deoxyribose-5-phosphate+(1.00)ADP<=>(1.00)Thyminose+(1.00)ATP	(1.00)cpd00510[c]+(1.00)cpd00008[c]<=>(1.00)cpd01242[c]+(1.00)cpd00002[c]		-1000	0	1	0
rxn10212	2.3.1.51		(1.00)1-tetradecanoyl-sn-glycerol_3-phosphate+(1.00)Myristoyl-CoA<=>(1.00)CoA+(1.00)1,2-ditetradecanoyl-sn-glycerol_3-phosphate	(1.00)cpd15331[c]+(1.00)cpd01695[c]<=>(1.00)cpd00010[c]+(1.00)cpd15522[c]		0	1000	0	0
rxn05540	3.A.1.5|3.|.1.5		(1.00)Ala-Gln+(1.00)H2O+(1.00)ATP<=>(1.00)Phosphate+(1.00)Ala-Gln+(1.00)H++(1.00)ADP	(1.00)cpd11587[e]+(1.00)cpd00001[c]+(1.00)cpd00002[c]<=>(1.00)cpd00009[c]+(1.00)cpd11587[c]+(1.00)cpd00067[c]+(1.00)cpd00008[c]		0	1000	0	0
rxn00851	6.3.2.4	R01150	(2.00)D-Alanine+(1.00)ATP<=>(1.00)Phosphate+(1.00)H++(1.00)ADP+(1.00)Ala-Ala	(2.00)cpd00117[c]+(1.00)cpd00002[c]<=>(1.00)cpd00009[c]+(1.00)cpd00067[c]+(1.00)cpd00008[c]+(1.00)cpd00731[c]		0	1000	0	0
rxn00858	3.5.3.11	R01157	(1.00)Agmatine+(1.00)H2O<=>(1.00)Putrescine+(1.00)Urea	(1.00)cpd00152[c]+(1.00)cpd00001[c]<=>(1.00)cpd00118[c]+(1.00)cpd00073[c]		0	1000	0	0
rxn02465	1.2.1.38	R03443	(1.00)Phosphate+(1.00)NADP+(1.00)2-Acetamido-5-oxopentanoate<=>(1.00)n-acetylglutamyl-phosphate+(1.00)NADPH	(1.00)cpd00009[c]+(1.00)cpd00006[c]+(1.00)cpd00918[c]<=>(1.00)cpd02552[c]+(1.00)cpd00005[c]		-1000	0	0	0
rxn01629	5.4.3.8	R02272	(1.00)5-Aminolevulinate<=>(1.00)L-Glutamate1-semialdehyde	(1.00)cpd00338[c]<=>(1.00)cpd02345[c]		-1000	1000	1	0
rxn08335	no match		(1.00)S-Dihydroorotate+(1.00)Ubiquinone-8<=>(1.00)Orotate+(1.00)Ubiquinol-8	(1.00)cpd00282[c]+(1.00)cpd15560[c]<=>(1.00)cpd00247[c]+(1.00)cpd15561[c]		0	0	0	0
rxn00827	2.7.7.43	R01117	(1.00)CTP+(1.00)Neu5Ac<=>(1.00)CMP-N-acetylneuraminate+(1.00)PPi	(1.00)cpd00052[c]+(1.00)cpd00232[c]<=>(1.00)cpd00112[c]+(1.00)cpd00012[c]		0	1000	0	0
rxn00137	3.1.3.7	R00188	(1.00)Adenosine_3-5-bisphosphate+(1.00)H2O<=>(1.00)Phosphate+(1.00)H++(1.00)AMP	(1.00)cpd00045[c]+(1.00)cpd00001[c]<=>(1.00)cpd00009[c]+(1.00)cpd00067[c]+(1.00)cpd00018[c]		0	1000	0	0
rxn10204	2.3.1.15		(1.00)strcoa+(1.00)Glycerol-3-phosphate<=>(1.00)CoA+(1.00)1-octadecanoyl-sn-glycerol_3-phosphate	(1.00)cpd00327[c]+(1.00)cpd00080[c]<=>(1.00)cpd00010[c]+(1.00)cpd15329[c]		0	1000	0	0
rxn00269	1.4.3.3|1.4.3.19	R00366	(1.00)Glycine+(1.00)O2+(1.00)H2O<=>(1.00)NH3+(1.00)Glyoxalate+(1.00)H2O2	(1.00)cpd00033[c]+(1.00)cpd00007[c]+(1.00)cpd00001[c]<=>(1.00)cpd00013[c]+(1.00)cpd00040[c]+(1.00)cpd00025[c]		-1000	1000	1	0
rxn05454	2.3.1.0		(1.00)15-methyl-hexa-decanoyl-ACP+(1.00)CoA<=>(1.00)fa11coa+(1.00)ACP	(1.00)cpd11544[c]+(1.00)cpd00010[c]<=>(1.00)cpd11432[c]+(1.00)cpd11493[c]		-1000	1000	1	0
rxn05179	no match		(1.00)H2O+(1.00)ATP+(1.00)L-Isoleucine<=>(1.00)Phosphate+(1.00)H++(1.00)ADP+(1.00)L-Isoleucine	(1.00)cpd00001[c]+(1.00)cpd00002[c]+(1.00)cpd00322[e]<=>(1.00)cpd00009[c]+(1.00)cpd00067[c]+(1.00)cpd00008[c]+(1.00)cpd00322[c]		0	1000	0	0
rxn00190	6.3.5.1	R00257	(1.00)L-Glutamine+(1.00)Deamido-NAD+(1.00)H2O+(1.00)ATP<=>(1.00)PPi+(1.00)L-Glutamate+(1.00)AMP+(1.00)NAD	(1.00)cpd00053[c]+(1.00)cpd00638[c]+(1.00)cpd00001[c]+(1.00)cpd00002[c]<=>(1.00)cpd00012[c]+(1.00)cpd00023[c]+(1.00)cpd00018[c]+(1.00)cpd00003[c]		0	1000	0	0
rxn00526	1.3.1.43|1.3.1.78|1.3.1.79	R00733	(1.00)Pretyrosine+(1.00)NADP<=>(1.00)NADPH+(1.00)CO2+(1.00)L-Tyrosine	(1.00)cpd00616[c]+(1.00)cpd00006[c]<=>(1.00)cpd00005[c]+(1.00)cpd00011[c]+(1.00)cpd00069[c]		0	1000	0	0
rxn08711	no match		(1.00)ADP-L-glycero-D-manno-heptose+(1.00)heptosyl-kdo2-lipidA<=>(1.00)heptosyl-heptosyl-kdo2-lipidA+(1.00)ADP	(1.00)cpd03831[c]+(1.00)cpd15485[c]<=>(1.00)cpd15484[c]+(1.00)cpd00008[c]		-1000	1000	1	0
rxn00101	3.5.1.5	R00131	(2.00)H++(1.00)Urea+(1.00)H2O<=>(2.00)NH3+(1.00)CO2	(2.00)cpd00067[c]+(1.00)cpd00073[c]+(1.00)cpd00001[c]<=>(2.00)cpd00013[c]+(1.00)cpd00011[c]		0	1000	0	0
rxn05417	2.3.1.0		(1.00)6-methyl-heptanoyl-ACP+(1.00)H++(1.00)Malonyl-acyl-carrierprotein-<=>(1.00)ACP+(1.00)8-methyl-3-oxo-nonanoyl-ACP+(1.00)CO2	(1.00)cpd11553[c]+(1.00)cpd00067[c]+(1.00)cpd11492[c]<=>(1.00)cpd11493[c]+(1.00)cpd11554[c]+(1.00)cpd00011[c]		0	1000	0	0
rxn03513	2.1.1.131	R05180	(1.00)Precorrin_3B+(1.00)S-Adenosyl-L-methionine<=>(2.00)H++(1.00)S-Adenosyl-homocysteine+(1.00)Precorrin_4	(1.00)cpd03833[c]+(1.00)cpd00017[c]<=>(2.00)cpd00067[c]+(1.00)cpd00019[c]+(1.00)cpd03834[c]		-1000	1000	1	0
rxn02680	2.3.1.16	R03778	(1.00)Octanoyl-CoA+(1.00)Acetyl-CoA<=>(1.00)3-Oxodecanoyl-CoA+(1.00)CoA	(1.00)cpd01335[c]+(1.00)cpd00022[c]<=>(1.00)cpd03119[c]+(1.00)cpd00010[c]		-1000	1000	1	0
rxn08086	2.3.1.51		(1.00)Palmitoyl-ACP+(1.00)1-hexadecanoyl-sn-glycerol_3-phosphate<=>(1.00)1,2-dihexadecanoyl-sn-glycerol_3-phosphate+(1.00)ACP	(1.00)cpd15277[c]+(1.00)cpd15327[c]<=>(1.00)cpd15524[c]+(1.00)cpd11493[c]		0	1000	0	0
rxn00549	no match	R00762	(1.00)D-fructose-1,6-bisphosphate+(1.00)H2O<=>(1.00)Phosphate+(1.00)H++(1.00)D-fructose-6-phosphate	(1.00)cpd00290[c]+(1.00)cpd00001[c]<=>(1.00)cpd00009[c]+(1.00)cpd00067[c]+(1.00)cpd00072[c]		0	1000	0	0
rxn05343	2.3.1.41	R04960	(1.00)Octanoyl-ACP+(1.00)H++(1.00)Malonyl-acyl-carrierprotein-<=>(1.00)3-oxodecanoyl-acp+(1.00)ACP+(1.00)CO2	(1.00)cpd11470[c]+(1.00)cpd00067[c]+(1.00)cpd11492[c]<=>(1.00)cpd11487[c]+(1.00)cpd11493[c]+(1.00)cpd00011[c]		0	1000	0	0
rxn08129	no match		(1.00)Maltose+(1.00)Maltohexaose<=>(1.00)Maltoheptaose+(1.00)D-Glucose	(1.00)cpd00179[c]+(1.00)cpd01329[c]<=>(1.00)cpd15494[c]+(1.00)cpd00027[c]		-1000	1000	1	0
rxn00938	3.5.1.19	R01268	(1.00)Nicotinamide+(1.00)H2O<=>(1.00)NH3+(1.00)Niacin	(1.00)cpd00133[c]+(1.00)cpd00001[c]<=>(1.00)cpd00013[c]+(1.00)cpd00218[c]		0	1000	0	0
rxn01022	2.4.2.28	R01402	(1.00)Phosphate+(1.00)H++(1.00)MTA<=>(1.00)Adenine+(1.00)methylthioribose-1-phosphate	(1.00)cpd00009[c]+(1.00)cpd00067[c]+(1.00)cpd00147[c]<=>(1.00)cpd00128[c]+(1.00)cpd02574[c]		-1000	1000	1	0
rxn12822	1.4.7.1	R00021	(2.00)Oxidizedferredoxin+(2.00)L-Glutamate<=>(2.00)Reducedferredoxin+(1.00)L-Glutamine+(2.00)H++(1.00)2-Oxoglutarate	(2.00)cpd11621[c]+(2.00)cpd00023[c]<=>(2.00)cpd11620[c]+(1.00)cpd00053[c]+(2.00)cpd00067[c]+(1.00)cpd00024[c]		-1000	0	1	0
rxn05449	1.3.1.0		(1.00)H++(1.00)NADH+(1.00)12-methyl-trans-tridec-2-enoyl-ACP<=>(1.00)12-methyl-tridecanoyl-ACP+(1.00)NAD	(1.00)cpd00067[c]+(1.00)cpd00004[c]+(1.00)cpd11564[c]<=>(1.00)cpd11565[c]+(1.00)cpd00003[c]		0	1000	0	0
rxn05377	4.2.1.0		(1.00)12-methyl-3-hydroxy-tetra-decanoyl-ACP<=>(1.00)H2O+(1.00)12-methyl-trans-tetra-dec-2-enoyl-ACP	(1.00)cpd11513[c]<=>(1.00)cpd00001[c]+(1.00)cpd11514[c]		-1000	1000	1	0
rxn05205	no match		(1.00)H++(1.00)Deoxycytidine<=>(1.00)H++(1.00)Deoxycytidine	(1.00)cpd00067[e]+(1.00)cpd00654[e]<=>(1.00)cpd00067[c]+(1.00)cpd00654[c]		-1000	1000	1	0
rxn08979	1.6.99.6		(1.00)NADPH+(1.00)2-Demethylmenaquinone_8+(1.00)H+<=>(1.00)2-Demethylmenaquinol_8+(1.00)NADP	(1.00)cpd00005[c]+(1.00)cpd15352[c]+(1.00)cpd00067[c]<=>(1.00)cpd15353[c]+(1.00)cpd00006[c]		0	1000	0	0
rxn05459	2.3.1.3		(1.00)Octodecanoyl-ACP+(1.00)CoA<=>(1.00)ACP+(1.00)strcoa	(1.00)cpd11573[c]+(1.00)cpd00010[c]<=>(1.00)cpd11493[c]+(1.00)cpd00327[c]		-1000	1000	1	0
rxn10221	2.7.7.41		(1.00)CTP+(1.00)1,2-dianteisoheptadecanoyl-sn-glycerol_3-phosphate<=>(1.00)PPi+(1.00)CDP-1,2-dianteisoheptadecanoylglycerol	(1.00)cpd00052[c]+(1.00)cpd15678[c]<=>(1.00)cpd00012[c]+(1.00)cpd15684[c]		-1000	1000	1	0
rxn09177	6.3.2.5	R04231	(1.00)CTP+(1.00)4-phosphopantothenate+(1.00)L-Cysteine<=>(1.00)PPi+(1.00)CMP+(1.00)(R)-4-Phosphopantothenoyl-L-cysteine	(1.00)cpd00052[c]+(1.00)cpd02201[c]+(1.00)cpd00084[c]<=>(1.00)cpd00012[c]+(1.00)cpd00046[c]+(1.00)cpd02666[c]		0	1000	0	0
rxn01871	2.3.1.12	R02569	(1.00)Dihydrolipoamide+(1.00)Acetyl-CoA<=>(1.00)S-Acetyldihydrolipoamide+(1.00)CoA	(1.00)cpd00449[c]+(1.00)cpd00022[c]<=>(1.00)cpd00836[c]+(1.00)cpd00010[c]		-1000	1000	1	0
rxn03437	4.2.1.9	R05070	(1.00)2,3-Dihydroxy-3-methylvalerate<=>(1.00)H2O+(1.00)3MOP	(1.00)cpd02535[c]<=>(1.00)cpd00001[c]+(1.00)cpd00508[c]		0	1000	0	0
rxn00062	3.6.3.14|3.6.3.19|3.6.3.26|3.6.3.40	R00086	(1.00)H2O+(1.00)ATP<=>(1.00)Phosphate+(1.00)H++(1.00)ADP	(1.00)cpd00001[c]+(1.00)cpd00002[c]<=>(1.00)cpd00009[c]+(1.00)cpd00067[c]+(1.00)cpd00008[c]		0	1000	0	0
rxn01208	no match	R01652	(1.00)CO2+(1.00)4MOP<=>(1.00)H++(1.00)2-isopropyl-3-oxosuccinate	(1.00)cpd00011[c]+(1.00)cpd00200[c]<=>(1.00)cpd00067[c]+(1.00)cpd02605[c]		-1000	0	0	0
rxn04132	no match	R06063	(1.00)5-Hydroxyisourate+(1.00)H2O<=>(1.00)CO2+(1.00)(R)-Allantoin	(1.00)cpd08625[c]+(1.00)cpd00001[c]<=>(1.00)cpd00011[c]+(1.00)cpd01567[c]		0	1000	0	0
rxn04133	no match	R06064	(1.00)5-Hydroxyisourate+(1.00)H2O<=>(1.00)Allantoin+(1.00)CO2	(1.00)cpd08625[c]+(1.00)cpd00001[c]<=>(1.00)cpd01092[c]+(1.00)cpd00011[c]		0	1000	0	0
rxn05319	no match		(1.00)H2O<=>(1.00)H2O	(1.00)cpd00001[e]<=>(1.00)cpd00001[c]		-1000	0	0	0
rxn05467	no match		(1.00)CO2<=>(1.00)CO2	(1.00)cpd00011[e]<=>(1.00)cpd00011[c]		-1000	1000	1	0
rxn05468	no match		(1.00)O2<=>(1.00)O2	(1.00)cpd00007[e]<=>(1.00)cpd00007[c]		-1000	1000	1	0
rxn02374	no match	R03314	(1.00)L-Glutamate5-semialdehyde<=>(1.00)H++(1.00)H2O+(1.00)1-Pyrroline-5-carboxylate	(1.00)cpd00858[c]<=>(1.00)cpd00067[c]+(1.00)cpd00001[c]+(1.00)cpd02431[c]		0	1000	0	0
rxn05116	no match	R07406	(1.00)H++(1.00)2-Amino-3-oxo-4-phosphonooxybutyrate<=>(1.00)CO2+(1.00)3-Amino-2-oxopropyl_phosphate	(1.00)cpd00067[c]+(1.00)cpd04539[c]<=>(1.00)cpd00011[c]+(1.00)cpd08449[c]		0	1000	0	0
rxn03012	no match	R04336	(1.00)L-2-Amino-6-oxopimelate<=>(1.00)H++(1.00)H2O+(1.00)tetrahydrodipicolinate	(1.00)cpd02414[c]<=>(1.00)cpd00067[c]+(1.00)cpd00001[c]+(1.00)cpd02465[c]		0	1000	0	0
rxn05064	4.2.1.104	R07316	(1.00)Carbamate+(2.00)H+<=>(1.00)NH3+(1.00)CO2	(1.00)cpd01101[c]+(2.00)cpd00067[c]<=>(1.00)cpd00013[c]+(1.00)cpd00011[c]		-1000	1000	1	0
rxn02666	no match	R03758	(1.00)Aminoacetone+(1.00)CO2<=>(1.00)H++(1.00)L-2-Amino-acetoacetate	(1.00)cpd01298[c]+(1.00)cpd00011[c]<=>(1.00)cpd00067[c]+(1.00)cpd02211[c]		-1000	0	0	0
rxn04457	no match	R06605	(1.00)5-Hydroxy-2-oxo-4-ureido-2,5-dihydro-1H-imidazole-5-carboxylate+(1.00)H+<=>(1.00)CO2+(1.00)(R)-Allantoin	(1.00)cpd09027[c]+(1.00)cpd00067[c]<=>(1.00)cpd00011[c]+(1.00)cpd01567[c]		0	1000	0	0
rxn04456	4.1.1.-	R06604	(1.00)5-Hydroxy-2-oxo-4-ureido-2,5-dihydro-1H-imidazole-5-carboxylate+(1.00)H+<=>(1.00)Allantoin+(1.00)CO2	(1.00)cpd09027[c]+(1.00)cpd00067[c]<=>(1.00)cpd01092[c]+(1.00)cpd00011[c]		0	1000	0	0
rxn01664	1.4.1.18	R02317	(1.00)H++(1.00)H2O+(1.00)delta1-Piperideine-6-L-carboxylate<=>(1.00)2-Aminoadipate_6-semialdehyde	(1.00)cpd00067[c]+(1.00)cpd00001[c]+(1.00)cpd00352[c]<=>(1.00)cpd02522[c]		-1000	0	0	0
rxn02916	no match	R04175	(1.00)2-Oxo-6-aminocaproate<=>(1.00)H++(1.00)H2O+(1.00)delta1-Piperideine-2-carboxylate	(1.00)cpd02074[c]<=>(1.00)cpd00067[c]+(1.00)cpd00001[c]+(1.00)cpd00922[c]		0	1000	0	0
rxn05667	no match		(1.00)Urea<=>(1.00)Urea	(1.00)cpd00073[e]<=>(1.00)cpd00073[c]		-1000	1000	1	0
rxn10571	no match		(1.00)H2O+(1.00)ATP+(1.00)Mg<=>(1.00)Phosphate+(1.00)H++(1.00)ADP+(1.00)Mg	(1.00)cpd00001[c]+(1.00)cpd00002[c]+(1.00)cpd00254[e]<=>(1.00)cpd00009[c]+(1.00)cpd00067[c]+(1.00)cpd00008[c]+(1.00)cpd00254[c]		0	1000	0	0
rxn05195	no match		(1.00)H2O+(1.00)ATP+(1.00)fe3<=>(1.00)Phosphate+(1.00)H++(1.00)ADP+(1.00)fe3	(1.00)cpd00001[c]+(1.00)cpd00002[c]+(1.00)cpd10516[e]<=>(1.00)cpd00009[c]+(1.00)cpd00067[c]+(1.00)cpd00008[c]+(1.00)cpd10516[c]		0	1000	0	0
rxn05555	no match		(1.00)Fe2++(1.00)H2O+(1.00)ATP<=>(1.00)Phosphate+(1.00)Fe2++(1.00)H++(1.00)ADP	(1.00)cpd10515[e]+(1.00)cpd00001[c]+(1.00)cpd00002[c]<=>(1.00)cpd00009[c]+(1.00)cpd10515[c]+(1.00)cpd00067[c]+(1.00)cpd00008[c]		0	1000	0	0
bio07630	no match		(0.00)Pyridoxal_phosphate+(0.18)L-Phenylalanine+(0.00)Fe2++(0.00)Cu2++(0.23)L-Asparagine+(0.00)Tetrahydrofolate+(0.09)Bactoprenyl_diphosphate+(0.26)L-Glutamine+(0.00)5-Methyltetrahydrofolate+(0.06)L-Tryptophan+(0.33)L-Lysine+(0.00)2-Demethylmenaquinone_8+(0.44)L-Leucine+(0.02)TTP+(0.23)L-Aspartate+(0.09)L-Histidine+(0.22)L-Proline+(0.60)Glycine+(0.25)L-Threonine+(0.00)Zn2++(0.00)K++(0.01)Glycogen…	(0.00)cpd00016[c]+(0.18)cpd00066[c]+(0.00)cpd10515[c]+(0.00)cpd00058[c]+(0.23)cpd00132[c]+(0.00)cpd00087[c]+(0.09)cpd02229[c]+(0.26)cpd00053[c]+(0.00)cpd00345[c]+(0.06)cpd00065[c]+(0.33)cpd00039[c]+(0.00)cpd15352[c]+(0.44)cpd00107[c]+(0.02)cpd00357[c]+(0.23)cpd00041[c]+(0.09)cpd00119[c]+(0.22)cpd00129[c]+(0.60)cpd00033[c]+(0.25)cpd00161[c]+(0.00)cpd00034[c]+(0.00)cpd00205[c]+(0.01)cpd00155[c]+(0.…		0	1000	0	1
rxn05722	no match		(1.00)H++(1.00)Thiamine_phosphate<=>(1.00)H++(1.00)Thiamine_phosphate	(1.00)cpd00067[e]+(1.00)cpd00793[e]<=>(1.00)cpd00067[c]+(1.00)cpd00793[c]		-1000	1000	1	0
rxn05255	no match		(1.00)Folate+(1.00)H+<=>(1.00)Folate+(1.00)H+	(1.00)cpd00393[e]+(1.00)cpd00067[e]<=>(1.00)cpd00393[c]+(1.00)cpd00067[c]		-1000	1000	1	0
rxn05236	1.17.4.2	R02023	(1.00)trdrd+(1.00)UTP<=>(1.00)dUTP+(1.00)trdox+(1.00)H2O	(1.00)cpd11421[c]+(1.00)cpd00062[c]<=>(1.00)cpd00358[c]+(1.00)cpd11420[c]+(1.00)cpd00001[c]		0	1000	0	0
rxn05232	1.17.4.2	R02014	(1.00)trdrd+(1.00)ATP<=>(1.00)trdox+(1.00)H2O+(1.00)dATP	(1.00)cpd11421[c]+(1.00)cpd00002[c]<=>(1.00)cpd11420[c]+(1.00)cpd00001[c]+(1.00)cpd00115[c]		0	1000	0	0
rxn05144	no match		(1.00)L-Glutamine+(1.00)D-Ribulose5-phosphate+(1.00)Glyceraldehyde3-phosphate<=>(1.00)Pyridoxal_phosphate+(1.00)Phosphate+(2.00)H++(3.00)H2O+(1.00)L-Glutamate	(1.00)cpd00053[c]+(1.00)cpd00171[c]+(1.00)cpd00102[c]<=>(1.00)cpd00016[c]+(1.00)cpd00009[c]+(2.00)cpd00067[c]+(3.00)cpd00001[c]+(1.00)cpd00023[c]		0	1000	0	0
rxn05039	3.1.3.-	R07280	(1.00)H2O+(1.00)5-Amino-6-5-phosphoribitylaminouracil<=>(1.00)Phosphate+(1.00)H++(1.00)4-1-D-Ribitylamino-5-aminouracil	(1.00)cpd00001[c]+(1.00)cpd02720[c]<=>(1.00)cpd00009[c]+(1.00)cpd00067[c]+(1.00)cpd02882[c]		0	1000	0	0
rxn04139	1.14.13.-	R06146	(1.00)NADPH+(1.00)O2+(1.00)2-Octaprenyl-3-methyl-6-methoxy-1,4-benzoquinone<=>(1.00)2-Octaprenyl-3-methyl-5-hydroxy-6-methoxy-1,4-benzoquinone+(1.00)H2O+(1.00)NADP	(1.00)cpd00005[c]+(1.00)cpd00007[c]+(1.00)cpd03448[c]<=>(1.00)cpd03449[c]+(1.00)cpd00001[c]+(1.00)cpd00006[c]		0	1000	0	0
rxn00966	4.1.3.40	R01302	(1.00)Pyruvate+(1.00)4-Hydroxybenzoate<=>(1.00)Chorismate	(1.00)cpd00020[c]+(1.00)cpd00136[c]<=>(1.00)cpd00216[c]		-1000	0	0	0
rxn00501	1.2.1.18|1.2.1.27	R00705	(1.00)3-Oxopropanoate+(1.00)CoA+(1.00)NAD<=>(1.00)NADH+(1.00)CO2+(1.00)Acetyl-CoA	(1.00)cpd00191[c]+(1.00)cpd00010[c]+(1.00)cpd00003[c]<=>(1.00)cpd00004[c]+(1.00)cpd00011[c]+(1.00)cpd00022[c]		-1000	1000	1	0
EX_cpd00104(e)			(1.00)BIOT<=>nothing	(1.00)cpd00104[e]<=>nothing		0	1000	1	0
EX_cpd00793(e)			(1.00)Thiamine_phosphate<=>nothing	(1.00)cpd00793[e]<=>nothing		0	1000	1	0
EX_cpd00073(e)			(1.00)Urea<=>nothing	(1.00)cpd00073[e]<=>nothing		0	1000	1	0
EX_cpd00249(e)			(1.00)Uridine<=>nothing	(1.00)cpd00249[e]<=>nothing		0	1000	1	0
EX_cpd03279(e)			(1.00)Deoxyinosine<=>nothing	(1.00)cpd03279[e]<=>nothing		0	1000	1	0
EX_cpd00971(e)			(1.00)Na+<=>nothing	(1.00)cpd00971[e]<=>nothing		-1000	1000	1	0
EX_cpd11590(e)			(1.00)met-L-ala-L<=>nothing	(1.00)cpd11590[e]<=>nothing		0	1000	1	0
EX_cpd00268(e)			(1.00)H2S2O3<=>nothing	(1.00)cpd00268[e]<=>nothing		0	1000	1	0
EX_cpd00322(e)			(1.00)L-Isoleucine<=>nothing	(1.00)cpd00322[e]<=>nothing		0	1000	1	0
EX_cpd00184(e)			(1.00)Thymidine<=>nothing	(1.00)cpd00184[e]<=>nothing		0	1000	1	0
EX_cpd00654(e)			(1.00)Deoxycytidine<=>nothing	(1.00)cpd00654[e]<=>nothing		0	1000	1	0
EX_cpd00179(e)			(1.00)Maltose<=>nothing	(1.00)cpd00179[e]<=>nothing		0	1000	1	0
EX_cpd00063(e)			(1.00)Ca2+<=>nothing	(1.00)cpd00063[e]<=>nothing		-1000	1000	1	0
EX_cpd00001(e)			(1.00)H2O<=>nothing	(1.00)cpd00001[e]<=>nothing		-1000	1000	1	0
EX_cpd11586(e)			(1.00)ala-L-glu-L<=>nothing	(1.00)cpd11586[e]<=>nothing		0	1000	1	0
EX_cpd00027(e)			(1.00)D-Glucose<=>nothing	(1.00)cpd00027[e]<=>nothing		0	1000	1	0
EX_cpd00412(e)			(1.00)Deoxyuridine<=>nothing	(1.00)cpd00412[e]<=>nothing		0	1000	1	0
EX_cpd11589(e)			(1.00)gly-asp-L<=>nothing	(1.00)cpd11589[e]<=>nothing		0	1000	1	0
EX_cpd15603(e)			(1.00)Gly-Cys<=>nothing	(1.00)cpd15603[e]<=>nothing		0	1000	1	0
EX_cpd11588(e)			(1.00)gly-pro-L<=>nothing	(1.00)cpd11588[e]<=>nothing		0	1000	1	0
EX_cpd00159(e)			(1.00)L-Lactate<=>nothing	(1.00)cpd00159[e]<=>nothing		0	1000	1	0
EX_cpd00048(e)			(1.00)Sulfate<=>nothing	(1.00)cpd00048[e]<=>nothing		-1000	1000	1	0
EX_cpd00367(e)			(1.00)Cytidine<=>nothing	(1.00)cpd00367[e]<=>nothing		0	1000	1	0
EX_cpd01262(e)			(1.00)Amylotriose<=>nothing	(1.00)cpd01262[e]<=>nothing		0	1000	1	0
EX_cpd15605(e)			(1.00)Gly-Phe<=>nothing	(1.00)cpd15605[e]<=>nothing		0	1000	1	0
EX_cpd00156(e)			(1.00)L-Valine<=>nothing	(1.00)cpd00156[e]<=>nothing		0	1000	1	0
EX_cpd00009(e)			(1.00)Phosphate<=>nothing	(1.00)cpd00009[e]<=>nothing		-1000	1000	1	0
EX_cpd15606(e)			(1.00)Gly-Tyr<=>nothing	(1.00)cpd15606[e]<=>nothing		0	1000	1	0
EX_cpd00013(e)			(1.00)NH3<=>nothing	(1.00)cpd00013[e]<=>nothing		-1000	1000	1	0
EX_cpd10515(e)			(1.00)Fe2+<=>nothing	(1.00)cpd10515[e]<=>nothing		-1000	1000	1	0
EX_cpd00030(e)			(1.00)Mn2+<=>nothing	(1.00)cpd00030[e]<=>nothing		-1000	1000	1	0
EX_cpd11591(e)			(1.00)Gly-Met<=>nothing	(1.00)cpd11591[e]<=>nothing		0	1000	1	0
EX_cpd00254(e)			(1.00)Mg<=>nothing	(1.00)cpd00254[e]<=>nothing		-1000	1000	1	0
EX_cpd00012(e)			(1.00)PPi<=>nothing	(1.00)cpd00012[e]<=>nothing		0	1000	1	0
EX_cpd11582(e)			(1.00)ala-L-Thr-L<=>nothing	(1.00)cpd11582[e]<=>nothing		0	1000	1	0
EX_cpd00067(e)			(1.00)H+<=>nothing	(1.00)cpd00067[e]<=>nothing		-1000	1000	1	0
EX_cpd00034(e)			(1.00)Zn2+<=>nothing	(1.00)cpd00034[e]<=>nothing		-1000	1000	1	0
EX_cpd04098(e)			(1.00)Arsenite<=>nothing	(1.00)cpd04098[e]<=>nothing		-1000	1000	1	0
EX_cpd15604(e)			(1.00)Gly-Leu<=>nothing	(1.00)cpd15604[e]<=>nothing		0	1000	1	0
EX_cpd00149(e)			(1.00)Co2+<=>nothing	(1.00)cpd00149[e]<=>nothing		-1000	1000	1	0
EX_cpd11580(e)			(1.00)Gly-Gln<=>nothing	(1.00)cpd11580[e]<=>nothing		0	1000	1	0
EX_cpd00107(e)			(1.00)L-Leucine<=>nothing	(1.00)cpd00107[e]<=>nothing		0	1000	1	0
EX_cpd00438(e)			(1.00)Deoxyadenosine<=>nothing	(1.00)cpd00438[e]<=>nothing		0	1000	1	0
EX_cpd11583(e)			(1.00)Ala-Leu<=>nothing	(1.00)cpd11583[e]<=>nothing		0	1000	1	0
EX_cpd00007(e)			(1.00)O2<=>nothing	(1.00)cpd00007[e]<=>nothing		-1000	1000	1	0
EX_cpd00058(e)			(1.00)Cu2+<=>nothing	(1.00)cpd00058[e]<=>nothing		-1000	1000	1	0
EX_cpd01012(e)			(1.00)Cd2+<=>nothing	(1.00)cpd01012[e]<=>nothing		-1000	1000	1	0
EX_cpd11574(e)			(1.00)Molybdate<=>nothing	(1.00)cpd11574[e]<=>nothing		-1000	1000	1	0
EX_cpd00531(e)			(1.00)Hg2+<=>nothing	(1.00)cpd00531[e]<=>nothing		-1000	1000	1	0
EX_cpd00011(e)			(1.00)CO2<=>nothing	(1.00)cpd00011[e]<=>nothing		-1000	1000	1	0
EX_cpd11585(e)			(1.00)L-alanylglycine<=>nothing	(1.00)cpd11585[e]<=>nothing		0	1000	1	0
EX_cpd00205(e)			(1.00)K+<=>nothing	(1.00)cpd00205[e]<=>nothing		-1000	1000	1	0
EX_cpd01048(e)			(1.00)Arsenate<=>nothing	(1.00)cpd01048[e]<=>nothing		-1000	1000	1	0
EX_cpd11416_c			(1.00)Biomass<=>nothing	(1.00)cpd11416[c]<=>nothing		-1000	1000	1	0
EX_cpd11584(e)			(1.00)Ala-His<=>nothing	(1.00)cpd11584[e]<=>nothing		0	1000	1	0
EX_cpd00264(e)			(1.00)Spermidine<=>nothing	(1.00)cpd00264[e]<=>nothing		0	1000	1	0
EX_cpd11593(e)			(1.00)ala-L-asp-L<=>nothing	(1.00)cpd11593[e]<=>nothing		0	1000	1	0
EX_cpd00099(e)			(1.00)Cl-<=>nothing	(1.00)cpd00099[e]<=>nothing		-1000	1000	1	0
EX_cpd00182(e)			(1.00)Adenosine<=>nothing	(1.00)cpd00182[e]<=>nothing		0	1000	1	0
EX_cpd11592(e)			(1.00)gly-glu-L<=>nothing	(1.00)cpd11592[e]<=>nothing		0	1000	1	0
EX_cpd01329(e)			(1.00)Maltohexaose<=>nothing	(1.00)cpd01329[e]<=>nothing		0	1000	1	0
EX_cpd00277(e)			(1.00)Deoxyguanosine<=>nothing	(1.00)cpd00277[e]<=>nothing		0	1000	1	0
EX_cpd11581(e)			(1.00)gly-asn-L<=>nothing	(1.00)cpd11581[e]<=>nothing		0	1000	1	0
EX_cpd00224(e)			(1.00)L-Arabinose<=>nothing	(1.00)cpd00224[e]<=>nothing		0	1000	1	0
EX_cpd10516(e)			(1.00)fe3<=>nothing	(1.00)cpd10516[e]<=>nothing		-1000	1000	1	0
EX_cpd00118(e)			(1.00)Putrescine<=>nothing	(1.00)cpd00118[e]<=>nothing		0	1000	1	0
EX_cpd00393(e)			(1.00)Folate<=>nothing	(1.00)cpd00393[e]<=>nothing		0	1000	1	0
EX_cpd00246(e)			(1.00)Inosine<=>nothing	(1.00)cpd00246[e]<=>nothing		0	1000	1	0
EX_cpd00053(e)			(1.00)L-Glutamine<=>nothing	(1.00)cpd00053[e]<=>nothing		0	1000	1	0
EX_cpd04097(e)			(1.00)Pb_Pb<=>nothing	(1.00)cpd04097[e]<=>nothing		0	1000	1	0
EX_cpd01017(e)			(1.00)Cys-Gly<=>nothing	(1.00)cpd01017[e]<=>nothing		0	1000	1	0
EX_cpd11587(e)			(1.00)Ala-Gln<=>nothing	(1.00)cpd11587[e]<=>nothing		0	1000	1	0
EX_photonI[e]			(1.00)Photon of 700 spectra<=>nothing	(1.00)photonI[e]<=>nothing		-1000	1000	0	0
EX_photonII[e]			(1.00)Photon of 680 spectra<=>nothing	(1.00)photonII[e]<=>nothing		-1000	1000	0	0
NJ_PSII	1.10.3.9		(4.00)H++(2.00)Ubiquinone-8+(2.00)H2O+(4.00)Photon of 680 spectra<=>(1.00)O2+(2.00)Ubiquinol-8+(4.00)proton in the thykaloid	(4.00)cpd00067[c]+(2.00)cpd15560[c]+(2.00)cpd00001[e]+(4.00)photonII[e]<=>(1.00)cpd00007[e]+(2.00)cpd15561[c]+(4.00)H[t]		0	1000	0	0
NJ_citb6	1.10.99.1		(4.00)H++(2.00)Ubiquinol-8+(4.00)Oxidized plastocyanin(PC)<=>(2.00)Ubiquinone-8+(8.00)proton in the thykaloid+(4.00)Reduced plastocyanin(PC*)	(4.00)cpd00067[c]+(2.00)cpd15561[c]+(4.00)cpd12265[c]<=>(2.00)cpd15560[c]+(8.00)H[t]+(4.00)cpd12239[c]		0	1000	0	0
NJ_PSI	1.97.1.12		(4.00)Oxidizedferredoxin+(4.00)Photon of 700 spectra+(4.00)Reduced plastocyanin(PC*)<=>(4.00)Reducedferredoxin+(4.00)Oxidized plastocyanin(PC)	(4.00)cpd11621[c]+(4.00)photonI[e]+(4.00)cpd12239[c]<=>(4.00)cpd11620[c]+(4.00)cpd12265[c]		0	1000	1	0
NJ_cyclicPS			(2.00)Reducedferredoxin+(2.00)H++(1.00)Ubiquinone-8<=>(2.00)Oxidizedferredoxin+(1.00)Ubiquinol-8	(2.00)cpd11620[c]+(2.00)cpd00067[c]+(1.00)cpd15560[c]<=>(2.00)cpd11621[c]+(1.00)cpd15561[c]		0	1000	1	0
NJ_FNR			(2.00)Reducedferredoxin+(1.00)H++(1.00)NADP<=>(1.00)NADPH+(2.00)Oxidizedferredoxin	(2.00)cpd11620[c]+(1.00)cpd00067[c]+(1.00)cpd00006[c]<=>(1.00)cpd00005[c]+(2.00)cpd11621[c]		0	1000	1	0
NJ_cyctochrome6	1.18.1.2	R01195	(4.00)H++(2.00)Ubiquinol-8+(4.00)cyctochrome_6<=>(2.00)Ubiquinone-8+(8.00)proton in the thykaloid+(4.00)cyctochrome_6(reduced)	(4.00)cpd00067[c]+(2.00)cpd15561[c]+(4.00)cyc6<=>(2.00)cpd15560[c]+(8.00)H[t]+(4.00)cyc6*(reduced)		0	1000	1	0
NJ_cyctorchome6_reduced	1.10.99.1		(4.00)H++(0.50)O2+(2.00)cyctochrome_6(reduced)<=>(1.00)H2O+(2.00)proton in the thykaloid+(2.00)cyctochrome_6	(4.00)cpd00067[c]+(0.50)cpd00007[c]+(2.00)cyc6*(reduced)<=>(1.00)cpd00001[c]+(2.00)H[t]+(2.00)cyc6		0	1000	1	0
rxn00062	3.6.3.14	R00086	(1.00)Phosphate+(1.00)ADP+(3.00)proton in the thykaloid<=>(2.00)H++(1.00)H2O+(1.00)ATP	(1.00)cpd00009[c]+(1.00)cpd00008[c]+(3.00)H[t]<=>(2.00)cpd00067[c]+(1.00)cpd00001[c]+(1.00)cpd00002[c]		0	1000	0	0
rxn06117	2.7.4.1	R02184	(1.00)PPi+(1.00)ATP<=>(1.00)Triphosphate+(1.00)H++(1.00)ADP	(1.00)cpd00012[c]+(1.00)cpd00002[c]<=>(1.00)cpd00421[c]+(1.00)cpd00067[c]+(1.00)cpd00008[c]		-1000	0	0	0
NJ_R04780	3.1.3.11	R04780	(1.00)D-fructose-1,6-bisphosphate+(1.00)H2O<=>(1.00)Phosphate+(1.00)H++(1.00)D-fructose-6-phosphate	(1.00)cpd00290[c]+(1.00)cpd00001[c]<=>(1.00)cpd00009[c]+(1.00)cpd00067[c]+(1.00)cpd00072[c]		-1000	1000	1	0
rxn02251	4.1.1.39	R03140	(1.00)D-Ribulose_1,5-bisphosphate+(1.00)O2<=>(1.00)3-Phosphoglycerate+(1.00)2-Phosphoglycolate+(2.00)H+	(1.00)cpd00871[c]+(1.00)cpd00007[c]<=>(1.00)cpd00169[c]+(1.00)cpd00727[c]+(2.00)cpd00067[c]		0	1000	0	0
rxn04443	2.2.1.1	R06590	(1.00)ribose-5-phosphate+(1.00)Aminofructose 6-phosphate<=>(1.00)Sedoheptulose7-phosphate+(1.00)Iminoerythrose 4-phosphate	(1.00)cpd00101[c]+(1.00)cpd08993[c]<=>(1.00)cpd00238[c]+(1.00)cpd08994[c]		0	1000	0	0
rxn04676	2.2.1.1	R06861	(1.00)D-Xylulose5-phosphate+(1.00)TPP<=>(1.00)Glyceraldehyde3-phosphate+(1.00)2-(1,2-Dihydroxyethyl)-TPP	(1.00)cpd00198[c]+(1.00)cpd00056[c]<=>(1.00)cpd00102[c]+(1.00)cpd09421[c]		-1000	1000	1	0
rxn04678	2.2.1.1	R06863	(1.00)Sedoheptulose7-phosphate+(1.00)TPP<=>(1.00)ribose-5-phosphate+(1.00)2-(1,2-Dihydroxyethyl)-TPP	(1.00)cpd00238[c]+(1.00)cpd00056[c]<=>(1.00)cpd00101[c]+(1.00)cpd09421[c]		-1000	1000	1	0
rxn01202	4.1.2.-	R01645	(1.00)4-Hydroxy-2-ketopimelate<=>(1.00)Pyruvate+(1.00)4-Oxobutanoate	(1.00)cpd03327[c]<=>(1.00)cpd00020[c]+(1.00)cpd00199[c]		-1000	1000	1	0
NJ_R01070	4.1.2.13	R01070	(1.00)D-fructose-1,6-bisphosphate<=>(1.00)Glycerone-phosphate+(1.00)Glyceraldehyde3-phosphate	(1.00)cpd00290[c]<=>(1.00)cpd00095[c]+(1.00)cpd00102[c]		-1000	1000	1	0
rxn00554	2.7.1.11	R00767	(1.00)CTP+(1.00)D-fructose-6-phosphate<=>(1.00)CDP+(1.00)D-fructose-1,6-bisphosphate	(1.00)cpd00052[c]+(1.00)cpd00072[c]<=>(1.00)cpd00096[c]+(1.00)cpd00290[c]		-1000	1000	1	0
rxn00556	2.7.1.11	R00769	(1.00)D-fructose-6-phosphate+(1.00)UTP<=>(1.00)D-fructose-1,6-bisphosphate+(1.00)UDP	(1.00)cpd00072[c]+(1.00)cpd00062[c]<=>(1.00)cpd00290[c]+(1.00)cpd00014[c]		-1000	1000	1	0
rxn00557	2.7.1.11	R00770	(1.00)ITP+(1.00)D-fructose-6-phosphate<=>(1.00)D-fructose-1,6-bisphosphate+(1.00)IDP	(1.00)cpd00068[c]+(1.00)cpd00072[c]<=>(1.00)cpd00290[c]+(1.00)cpd00090[c]		-1000	1000	1	0
rxn02315	2.7.1.11	R03237	(1.00)D-Tagatose_6-phosphate+(1.00)CTP<=>(1.00)D-Tagatose_1,6-biphosphate+(1.00)CDP	(1.00)cpd00805[c]+(1.00)cpd00052[c]<=>(1.00)cpd02371[c]+(1.00)cpd00096[c]		-1000	1000	1	0
rxn02316	2.7.1.11	R03238	(1.00)D-Tagatose_6-phosphate+(1.00)UTP<=>(1.00)D-Tagatose_1,6-biphosphate+(1.00)UDP	(1.00)cpd00805[c]+(1.00)cpd00062[c]<=>(1.00)cpd02371[c]+(1.00)cpd00014[c]		-1000	1000	1	0
rxn02317	2.7.1.11	R03239	(1.00)D-Tagatose_6-phosphate+(1.00)ITP<=>(1.00)D-Tagatose_1,6-biphosphate+(1.00)IDP	(1.00)cpd00805[c]+(1.00)cpd00068[c]<=>(1.00)cpd02371[c]+(1.00)cpd00090[c]		-1000	1000	1	0
rxn00304	2.7.1.40	R00430	(1.00)Pyruvate+(1.00)GTP<=>(1.00)Phosphoenolpyruvate+(1.00)GDP	(1.00)cpd00020[c]+(1.00)cpd00038[c]<=>(1.00)cpd00061[c]+(1.00)cpd00031[c]		-1000	1000	1	0
rxn00411	2.7.1.40	R00572	(1.00)Pyruvate+(1.00)CTP<=>(1.00)CDP+(1.00)Phosphoenolpyruvate	(1.00)cpd00020[c]+(1.00)cpd00052[c]<=>(1.00)cpd00096[c]+(1.00)cpd00061[c]		-1000	1000	1	0
rxn00460	2.7.1.40	R00659	(1.00)Pyruvate+(1.00)UTP<=>(1.00)UDP+(1.00)Phosphoenolpyruvate	(1.00)cpd00020[c]+(1.00)cpd00062[c]<=>(1.00)cpd00014[c]+(1.00)cpd00061[c]		-1000	1000	1	0
rxn00517	2.7.1.40	R00724	(1.00)Pyruvate+(1.00)ITP<=>(1.00)Phosphoenolpyruvate+(1.00)IDP	(1.00)cpd00020[c]+(1.00)cpd00068[c]<=>(1.00)cpd00061[c]+(1.00)cpd00090[c]		-1000	1000	1	0
rxn00840	2.7.1.40	R01138	(1.00)Pyruvate+(1.00)dATP<=>(1.00)dADP+(1.00)Phosphoenolpyruvate	(1.00)cpd00020[c]+(1.00)cpd00115[c]<=>(1.00)cpd00177[c]+(1.00)cpd00061[c]		-1000	1000	1	0
rxn01354	2.7.1.40	R01858	(1.00)Pyruvate+(1.00)dGTP<=>(1.00)Phosphoenolpyruvate+(1.00)dGDP	(1.00)cpd00020[c]+(1.00)cpd00241[c]<=>(1.00)cpd00061[c]+(1.00)cpd00295[c]		-1000	1000	1	0
rxn01667	2.7.1.40	R02320	(1.00)Pyruvate+(1.00)NTP<=>(1.00)Phosphoenolpyruvate+(1.00)NDP	(1.00)cpd00020[c]+(1.00)cpd00173[c]<=>(1.00)cpd00061[c]+(1.00)cpd00354[c]		-1000	1000	1	0
rxn02936	4.2.1.11	R04206	(1.00)3-Phospho-D-erythronate<=>(1.00)H2O+(1.00)Phosphoenol-4-deoxy-3-tetrulosonate	(1.00)cpd02132[c]<=>(1.00)cpd00001[c]+(1.00)cpd02645[c]		-1000	1000	1	0
rxn01216	5.4.2.1	R01662	(1.00)1,3-Bisphospho-D-glycerate<=>(1.00)H++(1.00)DPG	(1.00)cpd00203[c]<=>(1.00)cpd00067[c]+(1.00)cpd00853[c]		0	1000	0	0
rxn00198	1.1.1.42	R00267	(1.00)Isocitrate+(1.00)NADP<=>(1.00)NADPH+(1.00)2-Oxoglutarate+(1.00)CO2	(1.00)cpd00260[c]+(1.00)cpd00006[c]<=>(1.00)cpd00005[c]+(1.00)cpd00024[c]+(1.00)cpd00011[c]		0	1000	0	0
rxn05778	1.4.1.1|1.4.1.2|1.4.1.3|1.4.1.4	R00145	(1.00)H2O+(1.00)NAD+(1.00)alpha-Amino acid<=>(1.00)NH3+(1.00)NADH+(1.00)2-Oxo acid	(1.00)cpd00001[c]+(1.00)cpd00003[c]+(1.00)cpd03077[c]<=>(1.00)cpd00013[c]+(1.00)cpd00004[c]+(1.00)cpd11625[c]		-1000	1000	1	0
rxn00647	2.6.1.1	R00895	(1.00)2-Oxoglutarate+(1.00)L-Cysteine<=>(1.00)L-Glutamate+(1.00)Mercaptopyruvate	(1.00)cpd00024[c]+(1.00)cpd00084[c]<=>(1.00)cpd00023[c]+(1.00)cpd00706[c]		-1000	1000	1	0
rxn01757	2.6.1.1	R02433	(1.00)2-Oxoglutarate+(1.00)L-Cysteate<=>(1.00)L-Glutamate+(1.00)3-Sulfopyruvate	(1.00)cpd00024[c]+(1.00)cpd00395[c]<=>(1.00)cpd00023[c]+(1.00)cpd03285[c]		-1000	1000	1	0
rxn01906	2.6.1.1	R02619	(1.00)2-Oxoglutarate+(1.00)3-Sulfinoalanine<=>(1.00)L-Glutamate+(1.00)3-Sulfinopyruvate	(1.00)cpd00024[c]+(1.00)cpd00467[c]<=>(1.00)cpd00023[c]+(1.00)cpd03284[c]		-1000	1000	1	0
rxn01731	6.2.1.5	R02404	(1.00)ATP+(1.00)CoA+(1.00)Itaconate<=>(1.00)Phosphate+(1.00)ADP+(1.00)Itaconyl-CoA	(1.00)cpd00002[c]+(1.00)cpd00010[c]+(1.00)cpd00380[c]<=>(1.00)cpd00009[c]+(1.00)cpd00008[c]+(1.00)cpd00416[c]		0	1000	1	0
rxn02284	1.1.1.158	R03191	(1.00)UDP-MurNAc+(1.00)NAD<=>(1.00)UDP-N-acetylglucosamine_enolpyruvate+(1.00)H++(1.00)NADH	(1.00)cpd00773[c]+(1.00)cpd00003[c]<=>(1.00)cpd02820[c]+(1.00)cpd00067[c]+(1.00)cpd00004[c]		-1000	1000	1	0
rxn03141	6.3.2.10	R04573	(1.00)Ala-Ala+(1.00)ATP+(1.00)UDP-N-acetylmuramoyl-L-alanyl-gamma-D-glutamyl-L-lysine<=>(1.00)Phosphate+(1.00)UDPMurAc(oyl-L-Ala-D-gamma-Glu-L-Lys-D-Ala-D-Ala)+(1.00)H++(1.00)ADP	(1.00)cpd00731[c]+(1.00)cpd00002[c]+(1.00)cpd03490[c]<=>(1.00)cpd00009[c]+(1.00)cpd02862[c]+(1.00)cpd00067[c]+(1.00)cpd00008[c]		0	1000	0	0
rxn00165	4.3.1.15|4.3.1.17	R00220	(1.00)L-Serine<=>(1.00)NH3+(1.00)Pyruvate	(1.00)cpd00054[c]<=>(1.00)cpd00013[c]+(1.00)cpd00020[c]		0	1000	0	0
rxn07054	4.3.1.19	R06131	(1.00)H2O+(1.00)alpha-Amino acid<=>(1.00)NH3+(1.00)H++(1.00)2-Oxo acid	(1.00)cpd00001[c]+(1.00)cpd03077[c]<=>(1.00)cpd00013[c]+(1.00)cpd00067[c]+(1.00)cpd11625[c]		0	1000	0	0
rxn00202	2.3.3.14	R00271	(1.00)H++(1.00)CoA+(1.00)Homocitrate<=>(1.00)H2O+(1.00)2-Oxoglutarate+(1.00)Acetyl-CoA	(1.00)cpd00067[c]+(1.00)cpd00010[c]+(1.00)cpd00919[c]<=>(1.00)cpd00001[c]+(1.00)cpd00024[c]+(1.00)cpd00022[c]		-1000	0	0	0
rxn02749	4.2.1.35	R03896	(1.00)D-Citramalate<=>(1.00)H2O+(1.00)Citraconate	(1.00)cpd01700[c]<=>(1.00)cpd00001[c]+(1.00)cpd01502[c]		-1000	1000	1	0
rxn00499	1.1.1.27	R00703	(1.00)L-Lactate+(1.00)NAD<=>(1.00)H++(1.00)Pyruvate+(1.00)NADH	(1.00)cpd00159[c]+(1.00)cpd00003[c]<=>(1.00)cpd00067[c]+(1.00)cpd00020[c]+(1.00)cpd00004[c]		-1000	1000	1	0
rxn00741	1.1.1.27	R01000	(1.00)NAD+(1.00)2-Hydroxybutyrate<=>(1.00)2-Oxobutyrate+(1.00)H++(1.00)NADH	(1.00)cpd00003[c]+(1.00)cpd03561[c]<=>(1.00)cpd00094[c]+(1.00)cpd00067[c]+(1.00)cpd00004[c]		-1000	1000	1	0
rxn02228	1.1.1.27	R03104	(1.00)NAD+(1.00)3-Mercaptolactate<=>(1.00)H++(1.00)NADH+(1.00)Mercaptopyruvate	(1.00)cpd00003[c]+(1.00)cpd03455[c]<=>(1.00)cpd00067[c]+(1.00)cpd00004[c]+(1.00)cpd00706[c]		-1000	1000	1	0
rxn01530	1.1.1.1	R02124	(1.00)NAD+(1.00)Retinol<=>(1.00)H++(1.00)NADH+(1.00)Retinal	(1.00)cpd00003[c]+(1.00)cpd00365[c]<=>(1.00)cpd00067[c]+(1.00)cpd00004[c]+(1.00)cpd00304[c]		-1000	1000	1	0
rxn03282	1.1.1.1	R04805	(1.00)NAD+(1.00)5beta-Cholestane-3alpha,7alpha,26-triol<=>(1.00)H++(1.00)NADH+(1.00)3alpha,7alpha-Dihydroxy-5beta-cholestan-26-al	(1.00)cpd00003[c]+(1.00)cpd03227[c]<=>(1.00)cpd00067[c]+(1.00)cpd00004[c]+(1.00)cpd03228[c]		-1000	1000	1	0
rxn03333	1.1.1.1	R04880	(1.00)NAD+(1.00)3,4-Dihydroxyphenylethyleneglycol<=>(1.00)H++(1.00)NADH+(1.00)3,4-Dihydroxymandelaldehyde	(1.00)cpd00003[c]+(1.00)cpd03306[c]<=>(1.00)cpd00067[c]+(1.00)cpd00004[c]+(1.00)cpd03307[c]		-1000	1000	1	0
rxn14054	1.1.1.1	R05233	(1.00)NAD+(1.00)trans-3-Chloro-2-propene-1-ol<=>(1.00)H++(1.00)NADH+(1.00)3-Chloroallyl aldehyde	(1.00)cpd00003[c]+(1.00)cpd04015[c]<=>(1.00)cpd00067[c]+(1.00)cpd00004[c]+(1.00)cpd04017[c]		-1000	1000	NaN	0
rxn14089	1.1.1.1	R05234	(1.00)NAD+(1.00)cis-3-Chloro-2-propene-1-ol<=>(1.00)H++(1.00)NADH+(1.00)cis-3-Chloroallyl aldehyde	(1.00)cpd00003[c]+(1.00)cpd04016[c]<=>(1.00)cpd00067[c]+(1.00)cpd00004[c]+(1.00)cpd15064[c]		-1000	1000	NaN	0
rxn04726	1.1.1.1	R06917	(1.00)NAD+(1.00)1-Naphthalenemethanol<=>(1.00)H++(1.00)NADH+(1.00)1-Naphthaldehyde	(1.00)cpd00003[c]+(1.00)cpd09792[c]<=>(1.00)cpd00067[c]+(1.00)cpd00004[c]+(1.00)cpd09793[c]		-1000	1000	1	0
rxn04736	1.1.1.1	R06927	(1.00)NAD+(1.00)(2-Naphthyl)methanol<=>(1.00)H++(1.00)NADH+(1.00)2-Naphthaldehyde	(1.00)cpd00003[c]+(1.00)cpd01859[c]<=>(1.00)cpd00067[c]+(1.00)cpd00004[c]+(1.00)cpd09802[c]		-1000	1000	1	0
rxn04908	1.1.1.1	R07105	(1.00)H++(1.00)NADH+(1.00)Chloral hydrate<=>(1.00)H2O+(1.00)NAD+(1.00)Trichloroethanol	(1.00)cpd00067[c]+(1.00)cpd00004[c]+(1.00)cpd04248[c]<=>(1.00)cpd00001[c]+(1.00)cpd00003[c]+(1.00)cpd04661[c]		0	1000	0	0
rxn11809	1.1.1.1	R08281	(1.00)H++(1.00)NADH+(1.00)Aldophosphamide<=>(1.00)NAD+(1.00)Alcophosphamide	(1.00)cpd00067[c]+(1.00)cpd00004[c]+(1.00)cpd04806[c]<=>(1.00)cpd00003[c]+(1.00)cpd16365[c]		-1000	1000	1	0
rxn11834	1.1.1.1	R08306	(1.00)NAD+(1.00)2-Phenyl-1,3-propanediol monocarbamate<=>(1.00)H++(1.00)NADH+(1.00)3-Carbamoyl-2-phenylpropionaldehyde	(1.00)cpd00003[c]+(1.00)cpd16395[c]<=>(1.00)cpd00067[c]+(1.00)cpd00004[c]+(1.00)cpd16396[c]		-1000	1000	1	0
rxn11838	1.1.1.1	R08310	(1.00)NAD+(1.00)4-Hydroxy-5-phenyltetrahydro-1,3-oxazin-2-one<=>(1.00)H++(1.00)NADH+(1.00)5-Phenyl-1,3-oxazinane-2,4-dione	(1.00)cpd00003[c]+(1.00)cpd16401[c]<=>(1.00)cpd00067[c]+(1.00)cpd00004[c]+(1.00)cpd16402[c]		-1000	1000	1	0
rxn10770		R08557	(1.00)Choline+(1.00)NAD<=>(1.00)H++(1.00)NADH+(1.00)Betaine aldehyde	(1.00)cpd00098[c]+(1.00)cpd00003[c]<=>(1.00)cpd00067[c]+(1.00)cpd00004[c]+(1.00)cpd00447[c]		-1000	1000	1	0
rxn12191	1.1.1.1	R08558	(1.00)Choline+(1.00)NADP<=>(1.00)NADPH+(1.00)H++(1.00)Betaine aldehyde	(1.00)cpd00098[c]+(1.00)cpd00006[c]<=>(1.00)cpd00005[c]+(1.00)cpd00067[c]+(1.00)cpd00447[c]		-1000	1000	1	0
NJ_R09490	1.3.5.4	R09490	(1.00)Succinate+(1.00)mql7<=>(1.00)Fumarate+(1.00)Menaquinol	(1.00)cpd00036[c]+(1.00)cpd11451[c]<=>(1.00)cpd00106[c]+(1.00)cpd12783[c]		-1000	1000	1	0
rxn00490	4.2.1.51	R00691	(1.00)H++(1.00)Pretyrosine<=>(1.00)L-Phenylalanine+(1.00)H2O+(1.00)CO2	(1.00)cpd00067[c]+(1.00)cpd00616[c]<=>(1.00)cpd00066[c]+(1.00)cpd00001[c]+(1.00)cpd00011[c]		0	1000	0	0
rxn01268	1.3.1.43	1.3.1.12	(1.00)Prephenate+(1.00)NAD<=>(1.00)p-hydroxyphenylpyruvate+(1.00)NADH+(1.00)CO2	(1.00)cpd00219[c]+(1.00)cpd00003[c]<=>(1.00)cpd00868[c]+(1.00)cpd00004[c]+(1.00)cpd00011[c]		0	1000	0	0
rxn02928	1.3.1.26	R04198	(1.00)tetrahydrodipicolinate+(1.00)NAD<=>(1.00)H++(1.00)NADH+(1.00)Dihydrodipicolinate	(1.00)cpd02465[c]+(1.00)cpd00003[c]<=>(1.00)cpd00067[c]+(1.00)cpd00004[c]+(1.00)cpd02120[c]		-1000	1000	1	0
rxn03087	2.6.1.17	R04475	(1.00)2-Oxoglutarate+(1.00)N-Succinyl-L-2,6-diaminopimelate<=>(1.00)L-Glutamate+(1.00)N-Succinyl-L-2-amino-6-oxopimelate	(1.00)cpd00024[c]+(1.00)cpd02698[c]<=>(1.00)cpd00023[c]+(1.00)cpd02724[c]		-1000	1000	1	0
NJ_R09365	2.1.1.13	R09365	(1.00)Selenohomocysteine+(1.00)5-Methyltetrahydropteroyltri-L-glutamate<=>(1.00)Selenomethionine+(1.00)Tetrahydropteroyltri-L-glutamate	(1.00)cpd03397[c]+(1.00)cpd02738[c]<=>(1.00)cpd03163[c]+(1.00)cpd02555[c]		-1000	1000	1	0
rxn07292	2.8.1.7	R07460	(1.00)L-Cysteine+(1.00)C15811<=>(1.00)L-Alanine+(1.00)C15812	(1.00)cpd00084[c]+(1.00)cpd14547[c]<=>(1.00)cpd00035[c]+(1.00)cpd14548[c]		-1000	1000	1	0
rxn05779	1.4.1.1|1.4.1.2|1.4.1.3|1.4.1.4	R00146	(1.00)H2O+(1.00)NADP+(1.00)alpha-Amino acid<=>(1.00)NADPH+(1.00)NH3+(1.00)2-Oxo acid	(1.00)cpd00001[c]+(1.00)cpd00006[c]+(1.00)cpd03077[c]<=>(1.00)cpd00005[c]+(1.00)cpd00013[c]+(1.00)cpd11625[c]		-1000	1000	1	0
rxn03373	2.7.7.4	R04929	(1.00)ATP+(1.00)Selenate<=>(1.00)PPi+(1.00)Adenylylselenate	(1.00)cpd00002[c]+(1.00)cpd03396[c]<=>(1.00)cpd00012[c]+(1.00)cpd03388[c]		0	1000	1	0
rxn00623		R00858	(1.00)H2S+(3.00)H2O+(3.00)NADP<=>(3.00)NADPH+(1.00)Sulfite+(4.00)H+	(1.00)cpd00239[c]+(3.00)cpd00001[c]+(3.00)cpd00006[c]<=>(3.00)cpd00005[c]+(1.00)cpd00081[c]+(4.00)cpd00067[c]		-1000	1000	1	0
rxn05234	1.17.4.2	R02020	(1.00)trdrd+(1.00)GTP<=>(1.00)trdox+(1.00)H2O+(1.00)dGTP	(1.00)cpd11421[c]+(1.00)cpd00038[c]<=>(1.00)cpd11420[c]+(1.00)cpd00001[c]+(1.00)cpd00241[c]		0	1000	0	0
rxn05235	1.17.4.2	R02022	(1.00)trdrd+(1.00)CTP<=>(1.00)trdox+(1.00)H2O+(1.00)dCTP	(1.00)cpd11421[c]+(1.00)cpd00052[c]<=>(1.00)cpd11420[c]+(1.00)cpd00001[c]+(1.00)cpd00356[c]		0	1000	0	0
rxn06648	1.17.4.2	R04315	(1.00)trdox+(1.00)H2O+(1.00)2-Deoxyribonucleoside triphosphate<=>(1.00)trdrd+(1.00)Ribonucleoside triphosphate	(1.00)cpd11420[c]+(1.00)cpd00001[c]+(1.00)cpd02627[c]<=>(1.00)cpd11421[c]+(1.00)cpd02379[c]		-1000	0	0	0
rxn00107		R00139	(1.00)ATP+(1.00)2-Deoxy-5-hydroxymethylcytidine-5-diphosphate<=>(1.00)ADP+(1.00)2-Deoxy-5-hydroxymethylcytidine-5-triphosphate	(1.00)cpd00002[c]+(1.00)cpd07923[c]<=>(1.00)cpd00008[c]+(1.00)cpd07924[c]		0	1000	1	0
rxn02517	2.7.4.6	R03530	(1.00)ATP+(1.00)dIDP<=>(1.00)ADP+(1.00)dITP	(1.00)cpd00002[c]+(1.00)cpd00976[c]<=>(1.00)cpd00008[c]+(1.00)cpd00977[c]		0	1000	1	0
rxn11768	1.1.1.205	R08240	(1.00)H2O+(1.00)NAD+(1.00)6-Thioinosine 5-monophosphate<=>(1.00)H++(1.00)NADH+(1.00)6-Thioxanthine 5-monophosphate	(1.00)cpd00001[c]+(1.00)cpd00003[c]+(1.00)cpd02832[c]<=>(1.00)cpd00067[c]+(1.00)cpd00004[c]+(1.00)cpd16422[c]		-1000	1000	1	0
rxn00916	6.3.5.2	R01230	(1.00)NH3+(1.00)XMP+(1.00)ATP<=>(1.00)GMP+(1.00)H++(1.00)PPi+(1.00)AMP	(1.00)cpd00013[c]+(1.00)cpd00497[c]+(1.00)cpd00002[c]<=>(1.00)cpd00126[c]+(1.00)cpd00067[c]+(1.00)cpd00012[c]+(1.00)cpd00018[c]		0	1000	1	0
rxn11772	6.3.5.2	R08244	(1.00)L-Glutamine+(1.00)H2O+(1.00)ATP+(1.00)6-Thioxanthine 5-monophosphate<=>(1.00)H++(1.00)PPi+(1.00)L-Glutamate+(1.00)AMP+(1.00)6-Thioguanosine monophosphate	(1.00)cpd00053[c]+(1.00)cpd00001[c]+(1.00)cpd00002[c]+(1.00)cpd16422[c]<=>(1.00)cpd00067[c]+(1.00)cpd00012[c]+(1.00)cpd00023[c]+(1.00)cpd00018[c]+(1.00)cpd16423[c]		0	1000	1	0
rxn00657	2.6.1.19	R00908	(1.00)beta-Alanine+(1.00)2-Oxoglutarate<=>(1.00)3-Oxopropanoate+(1.00)L-Glutamate	(1.00)cpd00085[c]+(1.00)cpd00024[c]<=>(1.00)cpd00191[c]+(1.00)cpd00023[c]		-1000	1000	1	0
rxn01204	2.6.1.19	R01648	(1.00)GABA+(1.00)2-Oxoglutarate<=>(1.00)L-Glutamate+(1.00)4-Oxobutanoate	(1.00)cpd00281[c]+(1.00)cpd00024[c]<=>(1.00)cpd00023[c]+(1.00)cpd00199[c]		-1000	1000	1	0
rxn07243	3.1.3.25	R07343	(1.00)H2O+(1.00)myo-Inositol phosphate<=>(1.00)Phosphate+(1.00)L-Inositol	(1.00)cpd00001[c]+(1.00)cpd14496[c]<=>(1.00)cpd00009[c]+(1.00)cpd00121[c]		-1000	1000	1	0
rxn11771	3.6.1.19	R08243	(1.00)H2O+(1.00)6-Thioinosine-5-triphosphate<=>(1.00)PPi+(1.00)6-Thioinosine 5-monophosphate	(1.00)cpd00001[c]+(1.00)cpd16421[c]<=>(1.00)cpd00012[c]+(1.00)cpd02832[c]		0	1000	0	0
rxn14401	2.3.1.15	R09380	(1.00)Glycerol-3-phosphate+(1.00)Acyl-[acyl-carrier protein]<=>(1.00)ACP+(1.00)1-Acyl-sn-glycerol 3-phosphate	(1.00)cpd00080[c]+(1.00)cpd11628[c]<=>(1.00)cpd11493[c]+(1.00)cpd00517[c]		-1000	1000	NaN	0
rxn01953	5.1.3.14	R02707	(1.00)UDP+(1.00)N-Acetyl-D-mannosamine<=>(1.00)H2O+(1.00)UDP-N-acetyl-D-mannosamine	(1.00)cpd00014[c]+(1.00)cpd00492[c]<=>(1.00)cpd00001[c]+(1.00)cpd00861[c]		-1000	0	0	0
rxn05994	1.3.1.9	R01403	(1.00)NAD+(1.00)Acyl-[acyl-carrier protein]<=>(1.00)H++(1.00)NADH+(1.00)trans-2,3-Dehydroacyl-[acyl-carrier protein]	(1.00)cpd00003[c]+(1.00)cpd11628[c]<=>(1.00)cpd00067[c]+(1.00)cpd00004[c]+(1.00)cpd11728[c]		-1000	0	0	0
rxn06238	2.3.1.41	R02768	(1.00)Malonyl-acyl-carrierprotein-+(1.00)Acyl-[acyl-carrier protein]<=>(1.00)ACP+(1.00)CO2+(1.00)3-Oxoacyl-[acyl-carrier protein]	(1.00)cpd11492[c]+(1.00)cpd11628[c]<=>(1.00)cpd11493[c]+(1.00)cpd00011[c]+(1.00)cpd11726[c]		0	1000	0	0
rxn07576	2.3.1.41	R07762	(1.00)hexadecanoyl-acp+(1.00)Malonyl-acyl-carrierprotein-<=>(1.00)ACP+(1.00)CO2+(1.00)3-Oxostearoyl-[acp]	(1.00)cpd11476[c]+(1.00)cpd11492[c]<=>(1.00)cpd11493[c]+(1.00)cpd00011[c]+(1.00)cpd14938[c]		-1000	0	0	0
rxn00003	2.2.1.6	R00006	(1.00)CO2+(1.00)ALCTT<=>(1.00)H++(2.00)Pyruvate	(1.00)cpd00011[c]+(1.00)cpd00668[c]<=>(1.00)cpd00067[c]+(2.00)cpd00020[c]		-1000	0	0	0
NJ_R00226	2.2.1.6	R00226	(1.00)CO2+(1.00)ALCTT<=>(1.00)H++(2.00)Pyruvate	(1.00)cpd00011[c]+(1.00)cpd00668[c]<=>(1.00)cpd00067[c]+(2.00)cpd00020[c]		-1000	1000	1	0
rxn08043	4.1.3.18	2.2.1.6	(1.00)2-Oxobutyrate+(1.00)H++(1.00)Pyruvate<=>(1.00)2-Aceto-2-hydroxybutanoate+(1.00)CO2	(1.00)cpd00094[c]+(1.00)cpd00067[c]+(1.00)cpd00020[c]<=>(1.00)cpd00498[c]+(1.00)cpd00011[c]		0	1000	0	0
rxn00154	1.2.4.1	R00209	(1.00)Pyruvate+(1.00)CoA+(1.00)NAD<=>(1.00)NADH+(1.00)CO2+(1.00)Acetyl-CoA	(1.00)cpd00020[c]+(1.00)cpd00010[c]+(1.00)cpd00003[c]<=>(1.00)cpd00004[c]+(1.00)cpd00011[c]+(1.00)cpd00022[c]		-1000	1000	1	0
rxn01242	1.2.4.1	R01699	(1.00)Lipoamide+(1.00)H++(1.00)Pyruvate<=>(1.00)S-Acetyldihydrolipoamide+(1.00)CO2	(1.00)cpd00213[c]+(1.00)cpd00067[c]+(1.00)cpd00020[c]<=>(1.00)cpd00836[c]+(1.00)cpd00011[c]		0	1000	0	0
NJ_R09067	2.5.1.62	R09067	(1.00)Phytyl_diphosphate+(1.00)Chlorophyllide b<=>(1.00)PPi+(1.00)Chlorophyll b	(1.00)cpd03214[c]+(1.00)cpd16355[c]<=>(1.00)cpd00012[c]+(1.00)cpd03149[c]		-1000	1000	1	0
rxn02495	3.2.1.52	R03492	(1.00)H2O+(1.00)GA2<=>(1.00)N-Acetyl-D-chondrosamine+(1.00)LacCer	(1.00)cpd00001[c]+(1.00)cpd03656[c]<=>(1.00)cpd00832[c]+(1.00)cpd00947[c]		0	1000	0	0
rxn02922	3.2.1.52	R04184	(1.00)N-Acetyl-D-chondrosamine+(1.00)Trihexosylceramide<=>(1.00)H2O+(1.00)Globoside	(1.00)cpd00832[c]+(1.00)cpd02885[c]<=>(1.00)cpd00001[c]+(1.00)cpd02088[c]		-1000	0	0	0
rxn06737	3.2.1.52	R04586	(1.00)H2O+(1.00)GM2<=>(1.00)N-Acetyl-D-chondrosamine+(1.00)GM3	(1.00)cpd00001[c]+(1.00)cpd02996[c]<=>(1.00)cpd00832[c]+(1.00)cpd12599[c]		0	1000	0	0
rxn06893	2.5.1.-	R05267	(1.00)H++(1.00)Oxidized_glutathione+(1.00)Cl-+(1.00)Quinol<=>(2.00)GSH+(1.00)Chloroquinol	(1.00)cpd00067[c]+(1.00)cpd00111[c]+(1.00)cpd00099[c]+(1.00)cpd00415[c]<=>(2.00)cpd00042[c]+(1.00)cpd04005[c]		-1000	1000	1	0
rxn03581	2.5.1.-	R05269	(2.00)GSH+(1.00)2,5-Dichlorohydroquinone<=>(1.00)H++(1.00)Oxidized_glutathione+(1.00)Cl-+(1.00)Chloroquinol	(2.00)cpd00042[c]+(1.00)cpd04004[c]<=>(1.00)cpd00067[c]+(1.00)cpd00111[c]+(1.00)cpd00099[c]+(1.00)cpd04005[c]		-1000	1000	1	0
rxn03702	2.5.1.-	R05402	(2.00)GSH+(1.00)Tetrachlorohydroquinone<=>(1.00)H++(1.00)Oxidized_glutathione+(1.00)Cl-+(1.00)2,3,6-Trichlorohydroquinone	(2.00)cpd00042[c]+(1.00)cpd02174[c]<=>(1.00)cpd00067[c]+(1.00)cpd00111[c]+(1.00)cpd00099[c]+(1.00)cpd04374[c]		-1000	1000	1	0
rxn03703	2.5.1.-	R05403	(2.00)GSH+(1.00)2,3,6-Trichlorohydroquinone<=>(1.00)H++(1.00)Oxidized_glutathione+(1.00)Cl-+(1.00)2,6-Dichlorohydroquinone	(2.00)cpd00042[c]+(1.00)cpd04374[c]<=>(1.00)cpd00067[c]+(1.00)cpd00111[c]+(1.00)cpd00099[c]+(1.00)cpd04372[c]		-1000	1000	1	0
rxn05030	2.5.1.-	R07269	(1.00)Isopentenyldiphosphate+(1.00)all trans Decaprenyl diphosphate<=>(1.00)Bactoprenyl_diphosphate+(1.00)PPi	(1.00)cpd00113[c]+(1.00)cpd02746[c]<=>(1.00)cpd02229[c]+(1.00)cpd00012[c]		0	1000	0	0
rxn07331	2.5.1.-	R07500	(1.00)H++(1.00)Phytyl_diphosphate+(1.00)Homogentisate<=>(1.00)PPi+(1.00)CO2+(1.00)2-Methyl-6-phytylquinol	(1.00)cpd00067[c]+(1.00)cpd03214[c]+(1.00)cpd00426[c]<=>(1.00)cpd00012[c]+(1.00)cpd00011[c]+(1.00)cpd14613[c]		0	1000	0	0
rxn14061	2.5.1.-	R08748	(1.00)Isopentenyldiphosphate+(1.00)trans,trans,cis-Geranylgeranyl_diphosphate<=>(1.00)PPi+(1.00)ditrans,dicis-Pentaprenyl diphosphate	(1.00)cpd00113[c]+(1.00)cpd08211[c]<=>(1.00)cpd00012[c]+(1.00)cpd17565[c]		-1000	1000	NaN	0
rxn14333	2.5.1.-	R08749	(1.00)Isopentenyldiphosphate+(1.00)ditrans,dicis-Pentaprenyl diphosphate<=>(1.00)PPi+(1.00)ditrans,tricis-Hexaprenyl diphosphate	(1.00)cpd00113[c]+(1.00)cpd17565[c]<=>(1.00)cpd00012[c]+(1.00)cpd17564[c]		-1000	1000	NaN	0
rxn14334	2.5.1.-	R08750	(1.00)Isopentenyldiphosphate+(1.00)ditrans,tricis-Hexaprenyl diphosphate<=>(1.00)PPi+(1.00)ditrans,tetracis-Heptaprenyl diphosphate	(1.00)cpd00113[c]+(1.00)cpd17564[c]<=>(1.00)cpd00012[c]+(1.00)cpd17566[c]		-1000	1000	NaN	0
rxn14040	2.5.1.-	R08751	(1.00)Isopentenyldiphosphate+(1.00)ditrans,tetracis-Heptaprenyl diphosphate<=>(1.00)PPi+(1.00)ditrans,pentacis-Octaprenyl diphosphate	(1.00)cpd00113[c]+(1.00)cpd17566[c]<=>(1.00)cpd00012[c]+(1.00)cpd17567[c]		-1000	1000	NaN	0
rxn14011	2.5.1.-	R08752	(1.00)Isopentenyldiphosphate+(1.00)ditrans,pentacis-Octaprenyl diphosphate<=>(1.00)PPi+(1.00)ditrans,hexacis-Nonaprenyl diphosphate	(1.00)cpd00113[c]+(1.00)cpd17567[c]<=>(1.00)cpd00012[c]+(1.00)cpd17568[c]		-1000	1000	NaN	0
rxn13957	2.5.1.-	R08753	(1.00)Isopentenyldiphosphate+(1.00)ditrans,hexacis-Nonaprenyl diphosphate<=>(1.00)PPi+(1.00)all trans Decaprenyl diphosphate	(1.00)cpd00113[c]+(1.00)cpd17568[c]<=>(1.00)cpd00012[c]+(1.00)cpd02746[c]		-1000	1000	NaN	0
rxn00942	3.2.2.1	R01273	(1.00)H2O+(1.00)N-Ribosylnicotinamide<=>(1.00)Nicotinamide+(1.00)H++(1.00)D-Ribose	(1.00)cpd00001[c]+(1.00)cpd02016[c]<=>(1.00)cpd00133[c]+(1.00)cpd00067[c]+(1.00)cpd00105[c]		0	1000	0	0
rxn01683	3.2.2.1	R02341	(1.00)H2O+(1.00)Nebularine<=>(1.00)D-Ribose+(1.00)Purine	(1.00)cpd00001[c]+(1.00)cpd01197[c]<=>(1.00)cpd00105[c]+(1.00)cpd00360[c]		-1000	1000	1	0
rxn00176	6.2.1.1	R00236	(1.00)CoA+(1.00)Acetyl adenylate<=>(1.00)AMP+(1.00)Acetyl-CoA	(1.00)cpd00010[c]+(1.00)cpd03566[c]<=>(1.00)cpd00018[c]+(1.00)cpd00022[c]		0	1000	0	0
rxn00226	6.2.1.1	R00316	(1.00)Acetate+(1.00)H++(1.00)ATP<=>(1.00)PPi+(1.00)Acetyl adenylate	(1.00)cpd00029[c]+(1.00)cpd00067[c]+(1.00)cpd00002[c]<=>(1.00)cpd00012[c]+(1.00)cpd03566[c]		-1000	0	0	0
rxn00674	6.2.1.1	R00925	(1.00)H++(1.00)ATP+(1.00)CoA+(1.00)Propionate<=>(1.00)Propionyl-CoA+(1.00)PPi+(1.00)AMP	(1.00)cpd00067[c]+(1.00)cpd00002[c]+(1.00)cpd00010[c]+(1.00)cpd00141[c]<=>(1.00)cpd00086[c]+(1.00)cpd00012[c]+(1.00)cpd00018[c]		0	1000	0	0
rxn06045	2.7.8.5	R01801	(1.00)Glycerol-3-phosphate+(1.00)CDP-diacylglycerol<=>(1.00)CMP+(1.00)Phosphatidylglycerophosphate	(1.00)cpd00080[c]+(1.00)cpd11427[c]<=>(1.00)cpd00046[c]+(1.00)cpd11454[c]		-1000	1000	1	0
rxn06240	5.1.3.9	R02770	(1.00)N-Acyl-D-mannosamine 6-phosphate<=>(1.00)N-Acyl-D-glucosamine 6-phosphate	(1.00)cpd11727[c]<=>(1.00)cpd12473[c]		-1000	1000	1	0
rxn00346		R00489	(1.00)L-Aspartate+(1.00)H+<=>(1.00)beta-Alanine+(1.00)CO2	(1.00)cpd00041[c]+(1.00)cpd00067[c]<=>(1.00)cpd00085[c]+(1.00)cpd00011[c]		0	1000	0	0
rxn01231	4.1.1.15	R01682	(1.00)H++(1.00)L-Cysteate<=>(1.00)CO2+(1.00)Taurine	(1.00)cpd00067[c]+(1.00)cpd00395[c]<=>(1.00)cpd00011[c]+(1.00)cpd00210[c]		0	1000	0	0
rxn01784	4.1.1.15	R02466	(1.00)H++(1.00)3-Sulfinoalanine<=>(1.00)CO2+(1.00)Hypotaurine	(1.00)cpd00067[c]+(1.00)cpd00467[c]<=>(1.00)cpd00011[c]+(1.00)cpd00406[c]		-1000	1000	1	0
rxn00735		R00994	(1.00)2-Oxobutyrate+(1.00)NADH+(1.00)CO2<=>(1.00)NAD+(1.00)D-erythro-3-Methylmalate	(1.00)cpd00094[c]+(1.00)cpd00004[c]+(1.00)cpd00011[c]<=>(1.00)cpd00003[c]+(1.00)cpd03593[c]		-1000	0	0	0
NJ_R04439	1.1.1.86	R04439	(1.00)2,3-Dihydroxy-isovalerate+(1.00)NADP<=>(1.00)NADPH+(1.00)H++(1.00)ALCTT	(1.00)cpd02498[c]+(1.00)cpd00006[c]<=>(1.00)cpd00005[c]+(1.00)cpd00067[c]+(1.00)cpd00668[c]		-1000	1000	1	0
NJ_R09247	2.5.1.30	R09247	(4.00)Isopentenyldiphosphate+(1.00)Farnesyldiphosphate<=>(1.00)all-trans-Heptaprenyl_diphosphate+(4.00)PPi	(4.00)cpd00113[c]+(1.00)cpd00350[c]<=>(1.00)cpd02590[c]+(4.00)cpd00012[c]		-1000	1000	1	0
rxn00743	3.1.3.1	R01010	(1.00)H2O+(1.00)Glycerone-phosphate<=>(1.00)Phosphate+(1.00)H++(1.00)Glycerone	(1.00)cpd00001[c]+(1.00)cpd00095[c]<=>(1.00)cpd00009[c]+(1.00)cpd00067[c]+(1.00)cpd00157[c]		0	1000	0	0
rxn02166	3.1.3.1	R03024	(1.00)H2O+(1.00)4-Nitrophenyl phosphate<=>(1.00)Phosphate+(1.00)H++(1.00)PNP	(1.00)cpd00001[c]+(1.00)cpd02135[c]<=>(1.00)cpd00009[c]+(1.00)cpd00067[c]+(1.00)cpd00646[c]		0	1000	0	0
rxn03167	3.1.3.1	R04620	(1.00)7,8-Dihydroneopterin_3-triphosphate+(3.00)H2O<=>(3.00)Phosphate+(3.00)H++(1.00)Dihydroneopterin	(1.00)cpd02978[c]+(3.00)cpd00001[c]<=>(3.00)cpd00009[c]+(3.00)cpd00067[c]+(1.00)cpd02961[c]		0	1000	0	0
rxn00566	4.4.1.1	R00782	(1.00)H2O+(1.00)L-Cysteine<=>(1.00)NH3+(1.00)Pyruvate+(1.00)H2S	(1.00)cpd00001[c]+(1.00)cpd00084[c]<=>(1.00)cpd00013[c]+(1.00)cpd00020[c]+(1.00)cpd00239[c]		0	1000	0	0
rxn00950	4.4.1.8	R01285	(1.00)H2O+(1.00)Cystathionine<=>(1.00)NH3+(1.00)Pyruvate+(1.00)Homocysteine	(1.00)cpd00001[c]+(1.00)cpd00424[c]<=>(1.00)cpd00013[c]+(1.00)cpd00020[c]+(1.00)cpd00135[c]		0	1000	0	0
NJ_R01286	4.4.1.8	R01286	(1.00)H2O+(1.00)L-Cystathionine<=>(1.00)NH3+(1.00)Pyruvate+(1.00)Homocysteine	(1.00)cpd00001[c]+(1.00)KG_C02291[c]<=>(1.00)cpd00013[c]+(1.00)cpd00020[c]+(1.00)cpd00135[c]		-1000	1000	1	0
rxn01735	4.4.1.8	R02408	(1.00)H2O+(1.00)L-Cystine<=>(1.00)NH3+(1.00)Pyruvate+(1.00)Thiocysteine	(1.00)cpd00001[c]+(1.00)cpd00381[c]<=>(1.00)cpd00013[c]+(1.00)cpd00020[c]+(1.00)cpd01347[c]		-1000	1000	1	0
rxn03379	4.4.1.8	R04941	(1.00)H2O+(1.00)Selenocystathionine<=>(1.00)NH3+(1.00)Pyruvate+(1.00)Selenohomocysteine	(1.00)cpd00001[c]+(1.00)cpd03398[c]<=>(1.00)cpd00013[c]+(1.00)cpd00020[c]+(1.00)cpd03397[c]		-1000	1000	1	0
rxn00979	1.2.1.21	R01333	(1.00)Glycolaldehyde+(1.00)H2O+(1.00)NAD<=>(1.00)Glycolate+(2.00)H++(1.00)NADH	(1.00)cpd00229[c]+(1.00)cpd00001[c]+(1.00)cpd00003[c]<=>(1.00)cpd00139[c]+(2.00)cpd00067[c]+(1.00)cpd00004[c]		0	1000	0	0
NJ_R09077	1.5.3.17	R09077	(1.00)O2+(1.00)H2O+(1.00)Spermidine<=>(1.00)Putrescine+(1.00)H2O2+(1.00)3-Aminopropanal	(1.00)cpd00007[c]+(1.00)cpd00001[c]+(1.00)cpd00264[c]<=>(1.00)cpd00118[c]+(1.00)cpd00025[c]+(1.00)cpd01504[c]		-1000	1000	1	0
rxn01963		R02721	(1.00)Pyruvate+(1.00)Sulfate+(1.00)Glyceraldehyde3-phosphate<=>(1.00)Phosphate+(1.00)4-Methyl-5-2-hydroxyethyl-thiazole+(1.00)NH3	(1.00)cpd00020[c]+(1.00)cpd00048[c]+(1.00)cpd00102[c]<=>(1.00)cpd00009[c]+(1.00)cpd02636[c]+(1.00)cpd00013[c]		-1000	1000	1	0
rxn01539	3.1.3.-	R02135	(1.00)Thiamin+(1.00)Phosphate+(1.00)H+<=>(1.00)H2O+(1.00)Thiamine_phosphate	(1.00)cpd00305[c]+(1.00)cpd00009[c]+(1.00)cpd00067[c]<=>(1.00)cpd00001[c]+(1.00)cpd00793[c]		-1000	1000	1	0
rxn00653	1.2.1.3	R00904	(2.00)H++(1.00)beta-Alanine+(1.00)NADH<=>(1.00)H2O+(1.00)NAD+(1.00)3-Aminopropanal	(2.00)cpd00067[c]+(1.00)cpd00085[c]+(1.00)cpd00004[c]<=>(1.00)cpd00001[c]+(1.00)cpd00003[c]+(1.00)cpd01504[c]		-1000	1000	1	0
NJ_R02184	2.7.4.1	R02184	(1.00)ATP<=>(1.00)ADP+(1.00)Polyphosphate	(1.00)cpd00002[c]<=>(1.00)cpd00008[c]+(1.00)cpd11672[pool]		-1	1000	1	0
pool_polyP			(1.00)Polyphosphate<=>nothing	(1.00)cpd11672[pool]<=>nothing		0	1000	0	0
EX_cpd12854			(1.00)Silicon<=>nothing	(1.00)cpd12854<=>nothing		-1000	1000	1	0
KG_R01001	4.4.1.1	R01001	(1.00)H2O+(1.00)L-Cystathionine<=>(1.00)2-Oxobutyrate+(1.00)NH3+(1.00)L-Cysteine	(1.00)cpd00001[c]+(1.00)KG_C02291[c]<=>(1.00)cpd00094[c]+(1.00)cpd00013[c]+(1.00)cpd00084[c]		-1000	1000	1	0
pool_glycogen			(1.00)Glycogen<=>nothing	(1.00)cpd00155[c]<=>nothing		0	1000	1	0
KG_R04254	2.3.1.-	R04254	(1.00)(R)-3-Hydroxybutanoyl-CoA<=>(1.00)CoA+(1.00)Poly-beta-hydroxybutyrate	(1.00)cpd02234[c]<=>(1.00)cpd00010[c]+(1.00)KG_C06143		-1000	1000	1	0
pool_PHB			(1.00)Poly-beta-hydroxybutyrate<=>nothing	(1.00)KG_C06143<=>nothing		0	1000	1	0
NJ_R02063	1.3.1.83	R02063	(3.00)NADPH+(3.00)H++(1.00)Geranylgeranyl_diphosphate<=>(1.00)Phytyl_diphosphate+(3.00)NADP	(3.00)cpd00005[c]+(3.00)cpd00067[c]+(1.00)cpd00289[c]<=>(1.00)cpd03214[c]+(3.00)cpd00006[c]		-1000	1000	1	0
cyanophycin_synthesis	6.3.2.29|3.4.15.6	R09592|R09722	(1.00)L-Aspartate+(1.00)L-Arginine+(2.00)ATP<=>(2.00)Phosphate+(2.00)ADP+(1.00)H++(1.00)cyanophycin	(1.00)cpd00041[c]+(1.00)cpd00002[c]<=>(1.00)cpd00009[c]+(1.00)cpd00008[c]+(1.00)cyanophycin		-1000	1000	1	0
pool_cyanophycin			(1.00)cyanophycin<=>nothing	(1.00)cyanophycin<=>nothing		0	1000	1	0

## Sheet: Compounds
COMPOUND CODE	OFFICIAL NAME	FORMULA	CHARGE	KEGG ID
cpd15686[c]	CDP-1,2-diisopentadecanoylglycerol	C42H75N3O15P2	-2
cpd02371[c]	D-Tagatose_1,6-biphosphate	C6H12O12P2	-2	C03785
cpd15526[c]	1,2-dioctadecanoyl-sn-glycerol_3-phosphate	C39H76O8P	-1
cpd00016[c]	Pyridoxal_phosphate	C8H9NO6P	-1	C00018
cpd08375[c]	Cobalt-precorrin_8	C45H53CoN4O14	-5	C11545
cpd00939[c]	Toxopyrimidine	C6H9N3O	0	C01279
cpd00305[c]	Thiamin	C12H17N4OS	1	C00378
cpd02234[c]	(R)-3-Hydroxybutanoyl-CoA	C25H39N7O18P3S	-3	C03561
cpd15750[c]	Anteisoheptadecanoyllipoteichoic_acid (n=24), linked, unsubstituted	C121H236O135P24	-24
cpd02216[c]	Mg-protoporphyrin_IX	C34H30N4O4Mg	-1	C03516
cpd11478[c]	(R)-3-Hydroxybutanoyl-[acyl-carrier_protein]	C15H27N2O9PRS	-1	C04618
cpd03449[c]	2-Octaprenyl-3-methyl-5-hydroxy-6-methoxy-1,4-benzoquinone	C48H71O4	-1	C05815
cpd02979[c]	phosphoribosylformiminoaicar-phosphate	C15H23N5O15P2	-2	C04896
cpd00226[c]	HYXN	C5H4N4O	0	C00262
cpd02820[c]	UDP-N-acetylglucosamine_enolpyruvate	C20H26N3O19P2	-3	C04631
cpd00066[c]	L-Phenylalanine	C9H11NO2	0	C00079
cpd00348[c]	D-Galactose_1-phosphate	C6H12O9P	-1	C00446|C03384
cpd15548[c]	Phosphatidylglycerophosphate_dioctadec-11-enoyl	C42H78O13P2	-2
cpd08316[c]	D-Glycero-D-manno-heptose1-7-bisphosphate	C7H14O13P2	-2	C11472
cpd14545[c]	Iminoglycine	C2H2NO2	-1	C15809
cpd00094[c]	2-Oxobutyrate	C4H5O3	-1	C00109
cpd00298[c]	dTMP	C10H14N2O8P	-1	C00364
cpd11586[e]	ala-L-glu-L	C8H13N2O5	-1
cpd11586[c]	ala-L-glu-L	C8H13N2O5	-1
cpd11566[c]	14-methyl-3-oxo-pentadecanoyl-ACP	C27H49N2O9PRS	-1
cpd14507[c]	Peptide-L-methionine_(R)-S-oxide	C6H10N2O3R2S	0	C15653
cpd00143[c]	Phenylpyruvate	C9H7O3	-1	C00166
cpd11560[c]	10-methyl-trans-undec-2-enoyl-ACP	C23H41N2O8PRS	-1
cpd08625[c]	5-Hydroxyisourate	C5H4N4O4	0	C11821
cpd15748[c]	Stearoyllipoteichoic_acid (n=24), linked, unsubstituted	C123H240O135P24	-24
cpd11620[c]	Reducedferredoxin	Fe2R4S6	4	C00138
cpd02968[c]	UDP-N-acetylmuramoyl-L-alanyl-D-glutamyl-6-carboxy-L-lysyl-D-alanyl-_D-alanine	C41H61N9O28P2	-4	C04882
cpd00434[c]	4-Aminobutanal	C4H10NO	1	C00555
cpd11552[c]	6-methyl-trans-hept-2-enoyl-ACP	C19H33N2O8PRS	-1
cpd02097[c]	L-Glutamyl_5-phosphate	C5H9NO7P	-1	C03287
cpd15721[c]	Diisohexadecanoylphosphatidylglycerophosphate	C38H74O13P2	-2
cpd00871[c]	D-Ribulose_1,5-bisphosphate	C5H10O11P2	-2	C01182
cpd00722[c]	O-Acetyl-L-serine	C5H9NO4	0	C00979
cpd15672[c]	1-anteisoheptadecanoyl-sn-glycerol_3-phosphate	C20H40O7P	-1
cpd08288[c]	2-phospho-4-cytidine5-diphospho-2-C-methyl-D-erythritol	C14H23N3O17P3	-3	C11436
cpd00297[c]	dTDP	C10H14N2O11P2	-2	C00363
cpd01716[c]	3-Dehydroshikimate	C7H7O5	-1	C02637
cpd11440[c]	fa6	C16H31O2	-1
cpd11469[c]	(2E)-Dodecenoyl-[acp]	C23H41N2O8PRS	-1	C05758
cpd15606[e]	Gly-Tyr	C11H14N2O4	0
cpd15606[c]	Gly-Tyr	C11H14N2O4	0
cpd00009[e]	Phosphate	HO4P	-2	C00009
cpd00009[c]	Phosphate	HO4P	-2	C00009
cpd03407[c]	gamma-Glutamyl-beta-cyanoalanine	C9H12N3O5	-1	C05711
cpd11436[c]	fa3	C15H29O2	-1
cpd11513[c]	12-methyl-3-hydroxy-tetra-decanoyl-ACP	C26H49N2O9PRS	-1
cpd10515[e]	Fe2+	Fe	2	C14818
cpd10515[c]	Fe2+	Fe	2	C14818
cpd03187[c]	Oxalosuccinate	C6H3O7	-3	C05379
cpd02090[c]	Glycerophosphoglycerol	C6H14O8P	-1	C03274
cpd00742[c]	Allophanate	C2H3N2O3	-1	C01010
cpd03423[c]	alpha-Ribazole	C14H18N2O4	0	C05775
cpd11535[c]	11-methyl-trans-dodec-2-enoyl-ACP	C24H43N2O8PRS	-1
cpd12689[c]	3-Oxotetradecanoyl-CoA	C35H57N7O18P3S	-3	C05261
cpd03002[c]	Lipid_A disaccharide	C68H128N2O20P	-1	C04932
cpd03445[c]	2-Octaprenyl-6-hydroxyphenol	C46H70O2	0	C05811
cpd00177[c]	dADP	C10H13N5O9P2	-2	C00206
cpd11497[c]	4-methyl-3-hydroxy-hexanoyl-ACP	C18H33N2O9PRS	-1
cpd14955[c]	Lipoyl-AMP	C18H25N5O8PS2	-1	C16238
cpd11556[c]	8-methyl-trans-non-2-enoyl-ACP	C21H37N2O8PRS	-1
cpd00791[c]	ProtoporphyrinogenIX	C34H38N4O4	-2	C01079
cpd11541[c]	15-methyl-3-oxo-hexa-decanoyl-ACP	C28H51N2O9PRS	-1
cpd11437[c]	fa3coa	C36H61N7O17P3S	-3
cpd00126[c]	GMP	C10H13N5O8P	-1	C00144
cpd15702[c]	1,2-Dianteisoheptadecanoyl-sn-glycerol	C37H72O5	0
cpd11518[c]	14-methyl-trans-hexa-dec-2-enoyl-ACP	C28H51N2O8PRS	-1
cpd11484[c]	HMA	C25H47N2O9PRS	-1	C04688
cpd11505[c]	8-methyl-3-hydroxy-decanoyl-ACP	C22H41N2O9PRS	-1
cpd01882[c]	Isovaleryl-CoA	C26H41N7O17P3S	-3	C02939
cpd15353[c]	2-Demethylmenaquinol_8	C50H72O2	0
cpd00112[c]	CMP-N-acetylneuraminate	C20H29N4O16P	-2	C00128
cpd00284[c]	6-Phospho-D-gluconate	C6H11O10P	-2	C00345
cpd15769[c]	Isotetradecanoyllipoteichoic_acid (n=24), linked, N-acetyl-D-glucosamine	C307H536N24O255P24	-24
cpd00358[c]	dUTP	C9H12N2O14P3	-3	C00460
cpd00890[c]	UDP-N-acetylmuramoyl-L-alanine	C23H33N4O20P2	-3	C01212
cpd02552[c]	n-acetylglutamyl-phosphate	C7H10NO8P	-2	C04133
cpd00058[e]	Cu2+	Cu	2	C00070
cpd00058[c]	Cu2+	Cu	2	C00070
cpd15677[c]	1,2-diisoheptadecanoyl-sn-glycerol_3-phosphate	C37H72O8P	-1
cpd00193[c]	APS	C10H12N5O10PS	-2	C00224
cpd11527[c]	7-methyl-trans-oct-2-enoyl-ACP	C20H35N2O8PRS	-1
cpd00275[c]	L-Kynurenine	C10H12N2O3	0	C00328
cpd11510[c]	10-methyl-trans-dodec-2-enoyl-ACP	C24H43N2O8PRS	-1
cpd00421[c]	Triphosphate	HO10P3	-4	C00536
cpd06227[c]	THF-L-glutamate	C24H27N8O9	-3	C03541|C09332
cpd15705[c]	1,2-Dianteisopentadecanoyl-sn-glycerol	C33H64O5	0
cpd15494[c]	Maltoheptaose	C42H72O36	0
cpd15661[c]	Prenol-45n_teichoic acid	C206H386N2O242P47	-47
cpd00169[c]	3-Phosphoglycerate	C3H5O7P	-2	C00197|C00597
cpd03914[c]	Cob(II)yrinate_diamide	C45H57CoN6O12	-3	C06504
cpd00541[c]	Lipoate	C8H13O2S2	-1	C00725
cpd00132[c]	L-Asparagine	C4H8N2O3	0	C00152
cpd00005[c]	NADPH	C21H27N7O17P3	-3	C00005
cpd11435[c]	fa1coa	C35H59N7O17P3S	-3
cpd00087[c]	Tetrahydrofolate	C19H21N7O6	-2	C00101
cpd02345[c]	L-Glutamate1-semialdehyde	C5H9NO3	0	C03741
cpd15720[c]	Dianteisopentadecanoylphosphatidylglycerophosphate	C36H70O13P2	-2
cpd02636[c]	4-Methyl-5-2-hydroxyethyl-thiazole	C6H9NOS	0	C04294
cpd15418[c]	CDP-1,2-dihexadec-9-enoylglycerol	C44H75N3O15P2	-2
cpd02229[c]	Bactoprenyl_diphosphate	C55H90O7P2	-2	C04574
cpd00530[c]	XTP	C10H12N4O15P3	-3	C00700
cpd00042[c]	GSH	C10H16N3O6S	-1	C00051
cpd00390[c]	CDP-glucose	C15H23N3O16P2	-2	C00501
cpd11217[c]	1,4-Dihydroxy-2-naphthoyl-CoA	C32H39N7O19P3S	-3	C15547
cpd01015[c]	Cyanate	CNO	-1	C01417
cpd00247[c]	Orotate	C5H3N2O4	-1	C00295
cpd02948[c]	MurAc(oyl-L-Ala-D-gamma-Glu-L-Lys-D-Ala-D-Ala)-diphospho-_undecaprenol	C86H140N7O21P2	-3	C04851
cpd00501[c]	beta-D-Glucose_1-phosphate	C6H12O9P	-1	C00663
cpd00207[c]	Guanine	C5H5N5O	0	C00242
cpd11486[c]	3-Oxohexanoyl-[acp]	C17H29N2O9PRS	-1	C05746
cpd02547[c]	(R)-1-Aminopropan-2-yl_phosphate	C3H10NO4P	0	C04122
cpd15546[c]	Phosphatidylglycerophosphate_dihexadec-9-enoyl	C38H70O13P2	-2
cpd03119[c]	3-Oxodecanoyl-CoA	C31H49N7O18P3S	-3	C05265
cpd03123[c]	3-Oxohexanoyl-CoA	C27H41N7O18P3S	-3	C05269
cpd00196[c]	Acetylphosphate	C2H4O5P	-1	C00227
cpd00393[e]	Folate	C19H17N7O6	-2	C00504
cpd00393[c]	Folate	C19H17N7O6	-2	C00504
cpd03833[c]	Precorrin_3B	C43H44N4O17	-6	C06406
cpd00037[c]	UDP-N-acetylglucosamine	C17H25N3O17P2	-2	C00043
cpd02210[c]	Indoleglycerol_phosphate	C11H13NO6P	-1	C03506
cpd00053[e]	L-Glutamine	C5H10N2O3	0	C00064
cpd00053[c]	L-Glutamine	C5H10N2O3	0	C00064
cpd00727[c]	2-Phosphoglycolate	C2H3O6P	-2	C00988
cpd00206[c]	dCMP	C9H13N3O7P	-1	C00239
cpd02862[c]	UDPMurAc(oyl-L-Ala-D-gamma-Glu-L-Lys-D-Ala-D-Ala)	C40H62N9O26P2	-3	C04702
cpd02039[c]	1-Aminopropan-2-ol	C3H10NO	1	C03194|C05771
cpd15687[c]	CDP-1,2-dianteisopentadecanoylglycerol	C42H75N3O15P2	-2
cpd00299[c]	dUMP	C9H12N2O8P	-1	C00365
cpd11590[e]	met-L-ala-L	C8H15N2O3S	-1
cpd11590[c]	met-L-ala-L	C8H15N2O3S	-1
cpd00345[c]	5-Methyltetrahydrofolate	C20H23N7O6	-2	C00440
cpd15681[c]	1,2-dianteisopentadecanoyl-sn-glycerol_3-phosphate	C33H64O8P	-1
cpd04920[c]	D-Glycero-D-manno-heptose1-phosphate	C7H14O10P	-1	C07838
cpd15679[c]	1,2-diisotetradecanoyl-sn-glycerol_3-phosphate	C31H60O8P	-1
cpd00198[c]	D-Xylulose5-phosphate	C5H10O8P	-1	C00231
cpd00296[c]	dGMP	C10H13N5O7P	-1	C00362
cpd15673[c]	1-isotetradecanoyl-sn-glycerol_3-phosphate	C17H34O7P	-1
cpd02762[c]	Mg-Protoporphyrin_IX 13-monomethyl ester	C35H33N4O4Mg	0	C04536
cpd00227[c]	L-Homoserine	C4H9NO3	0	C00263
cpd15719[c]	Diisopentadecanoylphosphatidylglycerophosphate	C36H70O13P2	-2
cpd15484[c]	heptosyl-heptosyl-kdo2-lipidA	C124H222N2O51P2	-4
cpd00117[c]	D-Alanine	C3H7NO2	0	C00133
cpd00956[c]	1-(2-carboxyphenylamino)-1-deoxyribulose_5-phosphate	C12H14NO9P	-2	C01302|C10528
cpd11569[c]	14-methyl-pentadecanoyl-ACP	C27H51N2O8PRS	-1
cpd00521[c]	dTDP-4-oxo-6-deoxy-D-glucose	C16H22N2O15P2	-2	C11907
cpd02414[c]	L-2-Amino-6-oxopimelate	C7H10NO5	-1	C03871
cpd01262[e]	Amylotriose	C18H32O16	0	C01835
cpd01262[c]	Amylotriose	C18H32O16	0	C01835
cpd03832[c]	Hydrogenobyrinate	C45H54N4O14	-6	C06399
cpd11526[c]	7-methyl-3-hydroxy-octanoyl-ACP	C20H37N2O9PRS	-1
cpd02338[c]	UDP-D-galacto-1,4-furanose	C15H22N2O17P2	-2	C03733
cpd11825[c]	Octadecenoyl-ACP	C29H53N2O8PRS	-1	C01203
cpd00443[c]	ABEE	C7H6NO2	-1	C00568
cpd00428[c]	2-Oxopropanal	C3H4O2	0	C00546
cpd15277[c]	Palmitoyl-ACP	C27H51N2O8PRS	-1
cpd11549[c]	4-methyl-pentanoyl-ACP	C17H31N2O8PRS	-1
cpd01982[c]	5-Phosphoribosylamine	C5H12NO7P	0	C03090
cpd15268[c]	Octadecanoyl-ACP	C29H55N2O8PRS	-1
cpd00029[c]	Acetate	C2H3O2	-1	C00033
cpd00683[c]	Dihydropteroate	C14H13N6O3	-1	C00921
cpd08289[c]	1-deoxy-D-xylulose5-phosphate	C5H10O7P	-1	C11437
cpd11551[c]	6-methyl-3-hydroxy-heptanoyl-ACP	C19H35N2O9PRS	-1
cpd02791[c]	methylthioribulose-1-phosphate	C6H12O7PS	-1	C04582
cpd11441[c]	fa6coa	C37H63N7O17P3S	-3
cpd00075[c]	Nitrite	NO2	-1	C00088
cpd00065[c]	L-Tryptophan	C11H12N2O2	0	C00078|C00806
cpd00013[e]	NH3	H4N	1	C01342|C00014
cpd00013[c]	NH3	H4N	1	C01342|C00014
cpd15523[c]	1,2-ditetradec-7-enoyl-sn-glycerol_3-phosphate	C31H56O8P	-1
cpd00039[c]	L-Lysine	C6H15N2O2	1	C00047|C16440
cpd03524[c]	10-Formyl-THF-L-glutamate	C25H27N8O10	-3	C05928
cpd00638[c]	Deamido-NAD	C21H24N6O15P2	-2	C00857
cpd11591[e]	Gly-Met	C7H14N2O3S	0
cpd11591[c]	Gly-Met	C7H14N2O3S	0
cpd15701[c]	1,2-Diisoheptadecanoyl-sn-glycerol	C37H72O5	0
cpd11498[c]	4-methyl-trans-hex-2-enoyl-ACP	C18H31N2O8PRS	-1
cpd00151[c]	Thymine	C5H6N2O2	0	C00178
cpd11466[c]	Myristoyl-ACP	C25H47N2O8PRS	-1	C05761
cpd00128[c]	Adenine	C5H5N5	0	C00147
cpd11485[c]	3-oxohexadecanoyl-acp	C27H49N2O9PRS	-1	C05762
cpd16335[c]	2-Succinyl-5-enolpyruvyl-6-hydroxy-3-cyclohexene-1-carboxylate	C14H13O9	-3	C16519
cpd00738[c]	phosphoserine	C3H7NO6P	-1	C01005
cpd00050[c]	FMN	C17H20N4O9P	-1	C00061
cpd00836[c]	S-Acetyldihydrolipoamide	C10H19NO2S2	0	C16255|C01136
cpd11580[e]	Gly-Gln	C7H13N3O4	0
cpd11580[c]	Gly-Gln	C7H13N3O4	0
cpd15352[c]	2-Demethylmenaquinone_8	C50H70O2	0
cpd00231[c]	Dihydrobiopterin	C9H13N5O3	0	C00268
cpd11420[c]	trdox	C6H7NO2R2S2	0	C00343
cpd00107[e]	L-Leucine	C6H13NO2	0	C00123
cpd00107[c]	L-Leucine	C6H13NO2	0	C00123
cpd00357[c]	TTP	C10H14N2O14P3	-3	C00459
cpd00110[c]	Cytochrome_c2+	C42H52FeN8O6S2	4	C01071|C00126
cpd15676[c]	1-isohexadecanoyl-sn-glycerol_3-phosphate	C19H38O7P	-1
cpd12848[c]	Holo-[carboxylase]	C17H27N5O4R2S	0	C06250
cpd00782[c]	Pimeloyl-CoA	C28H42N7O19P3S	-4	C01063
cpd11504[c]	8-methyl-3-oxo-decanoyl-ACP	C22H39N2O9PRS	-1
cpd00133[c]	Nicotinamide	C6H6N2O	0	C00153
cpd00221[c]	D-Lactate	C3H5O3	-1	C00256
cpd00103[c]	PRPP	C5H10O14P3	-3	C00119
cpd00113[c]	Isopentenyldiphosphate	C5H10O7P2	-2	C00129
cpd00190[c]	beta-D-Glucose	C6H12O6	0	C00221
cpd02315[c]	6-Pyruvoyltetrahydropterin	C9H11N5O3	0	C03684
cpd15237[c]	hexadecenoate	C16H29O2	-1
cpd03205[c]	Phytoene	C40H64	0	C05413
cpd11511[c]	10-methyl-dodecanoyl-ACP	C24H45N2O8PRS	-1
cpd00081[c]	Sulfite	HO3S	-1	C00094|C11481
cpd00045[c]	Adenosine_3-5-bisphosphate	C10H13N5O10P2	-2	C00054
cpd12370[c]	apo-ACP	HOR	0	C03688
cpd11534[c]	11-methyl-3-hydroxy-dodecanoyl-ACP	C24H45N2O9PRS	-1
cpd02851[c]	AICAR	C9H14N4O8P	-1	C04677
cpd11470[c]	Octanoyl-ACP	C19H35N2O8PRS	-1	C05752
cpd11557[c]	8-methyl-nonanoyl-ACP	C21H39N2O8PRS	-1
cpd12227[c]	L-Glutamyl-tRNA-Glu	C15H19N6O6R	0	C02987
cpd00449[c]	Dihydrolipoamide	C8H17NOS2	0	C00579|C15973
cpd00120[c]	Butyryl-CoA	C25H39N7O17P3S	-3	C00136
cpd00032[c]	Oxaloacetate	C4H2O5	-2	C00036
cpd00363[c]	Ethanol	C2H6O	0	C00469
cpd00139[c]	Glycolate	C2H3O3	-1	C00160
cpd15768[c]	Anteisoheptadecanoyllipoteichoic_acid (n=24), linked, N-acetyl-D-glucosamine	C313H548N24O255P24	-24
cpd02168[c]	Prephytoene_diphosphate	C40H66O7P2	-2	C03427
cpd03517[c]	Biotinyl-5-AMP	C20H27N7O9PS	-1	C05921
cpd04122[c]	Aminoacetaldehyde	C2H6NO	1	C06735
cpd02826[c]	5-Phosphoribosylformylglycinamidine	C8H16N3O8P	0	C04640
cpd15706[c]	1,2-Diisohexadecanoyl-sn-glycerol	C35H68O5	0
cpd11519[c]	14-methyl-hexa-decanoyl-ACP	C28H53N2O8PRS	-1
cpd11587[e]	Ala-Gln	C8H15N3O4	0
cpd11587[c]	Ala-Gln	C8H15N3O4	0
cpd03646[c]	gamma-Glutamyl-3-aminopropiononitrile	C8H13N3O3	0	C06114
cpd00233[c]	Tetrahydrobiopterin	C9H15N5O3	0	C00272
cpd08286[c]	2-C-methyl-D-erythritol4-phosphate	C5H12O7P	-1	C11434
cpd02964[c]	UDP-N-acetylmuramoyl-L-alanyl-D-gamma-glutamyl-meso-2-6-diaminopimelate	C35H51N7O26P2	-4	C04877
cpd02113[c]	dTDP-rhamnose	C16H24N2O15P2	-2	C03319
cpd02569[c]	2-Oxo-3-hydroxyisovalerate	C5H7O4	-1	C04181
cpd00859[c]	Pseudouridine_5-phosphate	C9H12N2O9P	-1	C01168
cpd03121[c]	3-Oxooctanoyl-CoA	C29H45N7O18P3S	-3	C05267
cpd03446[c]	2-Octaprenyl-6-methoxyphenol	C47H72O2	0	C05812
cpd15269[c]	octadecenoate	C18H33O2	-1
cpd11483[c]	(R)-3-Hydroxyoctanoyl-[acyl-carrier_protein]	C19H35N2O9PRS	-1	C04620
cpd02140[c]	AIR	C8H14N3O7P	0	C03373
cpd03847[c]	Myristic_acid	C14H27O2	-1	C06424
cpd00932[c]	5-O-1-Carboxyvinyl-3-phosphoshikimate	C10H10O10P	-3	C01269
cpd11588[e]	gly-pro-L	C7H12N2O3	0
cpd11588[c]	gly-pro-L	C7H12N2O3	0
cpd03913[c]	Hydrogenobyrinate_diamide	C45H58N6O12	-4	C06503
cpd11568[c]	14-methyl-trans-pentadec-2-enoyl-ACP	C27H49N2O8PRS	-1
cpd02182[c]	(R)-S-Lactoylglutathione	C13H20N3O8S	-1	C03451
cpd15307[c]	1,2-Diacyl-sn-glycerol_ditetradecanoyl	C31H60O5	0
cpd02484[c]	Inositol_3-phosphate	C6H12O9P	-1	C04006
cpd11537[c]	13-methyl-3-oxo-tetra-decanoyl-ACP	C26H47N2O9PRS	-1
cpd00343[c]	N-Carbamoyl-L-aspartate	C5H6N2O5	-2	C00438
cpd00213[c]	Lipoamide	C8H15NOS2	0	C15972|C00248
cpd00805[c]	D-Tagatose_6-phosphate	C6H12O9P	-1	C01097
cpd01242[c]	Thyminose	C5H10O4	0	C01801
cpd03919[c]	Adenosyl_cobinamide phosphate	C58H84CoN16O14P	0	C06509
cpd11516[c]	14-methyl-3-oxo-hexa-decanoyl-ACP	C28H51N2O9PRS	-1
cpd00346[c]	L-Aspartate4-semialdehyde	C4H7NO3	0	C00441
cpd00800[c]	8-Amino-7-oxononanoate	C9H17NO3	0	C01092
cpd11573[c]	Octodecanoyl-ACP	C29H55N2O8PRS	-1
cpd00092[c]	Uracil	C4H4N2O2	0	C00106
cpd00807[c]	L-histidinol-phosphate	C6H12N3O4P	0	C01100
cpd15704[c]	1,2-Diisopentadecanoyl-sn-glycerol	C33H64O5	0
cpd02978[c]	7,8-Dihydroneopterin_3-triphosphate	C9H13N5O13P3	-3	C04895
cpd00242[c]	H2CO3	CHO3	-1	C01353|C00288
cpd00982[c]	FADH2	C27H33N9O15P2	-2	C01352
cpd11488[c]	Acetoacetyl-ACP	C15H25N2O9PRS	-1	C05744
cpd00096[c]	CDP	C9H13N3O11P2	-2	C00112
cpd14961[c]	Cobalt-precorrin_7	C45H50CoN4O16	-6	C16244
cpd11540[c]	13-methyl-tetra-decanoyl-ACP	C26H49N2O8PRS	-1
cpd11528[c]	7-methyl-octanoyl-ACP	C20H37N2O8PRS	-1
cpd00041[c]	L-Aspartate	C4H6NO4	-1	C00049|C16433
cpd00108[c]	Galactose	C6H12O6	0	C00124
cpd00387[c]	ADPglucose	C16H23N5O15P2	-2	C00498
cpd15421[c]	CDP-1,2-dioctadecanoylglycerol	C48H87N3O15P2	-2
cpd00837[c]	S-Adenosylmethioninamine	C14H24N6O3S	2	C01137
cpd08301[c]	2-C-methyl-D-erythritol2-4-cyclodiphosphate	C5H10O9P2	-2	C11453
cpd03519[c]	2,5-Diaminopyrimidine_nucleoside triphosphate	C9H15N5O14P3	-3	C05923
cpd02678[c]	N-Formyl-GAR	C8H14N2O9P	-1	C04376
cpd00498[c]	2-Aceto-2-hydroxybutanoate	C6H9O4	-1	C00659|C06006
cpd01101[c]	Carbamate	CH2NO2	-1	C01563
cpd11496[c]	4-methyl-3-oxo-hexanoyl-ACP	C18H31N2O9PRS	-1
cpd11430[c]	fa1	C14H27O2	-1
cpd15309[c]	1,2-Diacyl-sn-glycerol_dihexadecanoyl	C35H68O5	0
cpd11475[c]	(2E)-Decenoyl-[acp]	C21H37N2O8PRS	-1	C05754
cpd00162[c]	Aminoethanol	C2H8NO	1	C00189
cpd02625[c]	3-Hydroxy-L-1-pyrroline-5-carboxylate	C5H6NO3	-1	C04281
cpd09027[c]	5-Hydroxy-2-oxo-4-ureido-2,5-dihydro-1H-imidazole-5-carboxylate	C5H5N4O5	-1	C12248
cpd01974[c]	4-Hydroxy-L-glutamate	C5H8NO5	-1	C03079|C05947
cpd11553[c]	6-methyl-heptanoyl-ACP	C19H35N2O8PRS	-1
cpd00119[c]	L-Histidine	C6H9N3O2	0	C00135
cpd03488[c]	Undecaprenyl-diphospho-N-acetylmuramoyl-(N-acetylglucosamine)-L-alanyl-D-glutaminyl-L-lysyl-D-alanyl-D-alanine	C94H155N9O25P2	-2
cpd01401[c]	Vitamin_K1	C31H46O2	0	C02059
cpd00314[c]	D-Mannitol	C6H14O6	0	C00392
cpd02096[c]	L-3-Amino-isobutyrate	C4H9NO2	0	C03284
cpd02608[c]	6-Lactoyl-5,6,7,8-tetrahydropterin	C9H13N5O3	0	C04244
cpd00868[c]	p-hydroxyphenylpyruvate	C9H7O4	-1	C01179
cpd01630[c]	cis,cis-Muconate	C6H4O4	-2	C02480
cpd11621[c]	Oxidizedferredoxin	Fe2R4S6	6	C00139
cpd00067[e]	H+	H	1	C00080
cpd00067[c]	H+	H	1	C00080
cpd04098[e]	Arsenite	H3O3As	0	C06697
cpd04098[c]	Arsenite	H3O3As	0	C06697
cpd00134[c]	Palmitoyl-CoA	C37H63N7O17P3S	-3	C00154
cpd00851[c]	trans-4-Hydroxy-L-proline	C5H8NO3	-1	C01157
cpd00281[c]	GABA	C4H9NO2	0	C00334
cpd15524[c]	1,2-dihexadecanoyl-sn-glycerol_3-phosphate	C35H68O8P	-1
cpd15330[c]	1-tetradec-7-enoyl-sn-glycerol_3-phosphate	C17H32O7P	-1
cpd00282[c]	S-Dihydroorotate	C5H5N2O4	-1	C00337
cpd00129[c]	L-Proline	C5H8NO2	-1	C00148
cpd11421[c]	trdrd	C6H9NO2R2S2	0	C00342
cpd00238[c]	Sedoheptulose7-phosphate	C7H14O10P	-1	C05382
cpd00033[c]	Glycine	C2H5NO2	0	C00037
cpd00260[c]	Isocitrate	C6H5O7	-3	C00311
cpd02701[c]	S-Adenosyl-4-methylthio-2-oxobutanoate	C15H19N5O6S	0	C04425
cpd00533[c]	dCDP	C9H13N3O10P2	-2	C00705
cpd00359[c]	indol	C8H7N	0	C00463
cpd00635[c]	Cbl	C62H89CoN13O14P	0	C00853
cpd00191[c]	3-Oxopropanoate	C3H3O3	-1	C00222
cpd15544[c]	Phosphatidylglycerophosphate_ditetradec-7-enoyl	C34H62O13P2	-2
cpd11538[c]	13-methyl-3-hydroxy-tetra-decanoyl-ACP	C26H49N2O9PRS	-1
cpd15306[c]	1,2-Diacyl-sn-glycerol_didodecanoyl	C27H52O5	0
cpd03485[c]	N-Acetyl-D-muramoate	C11H18NO8	-1
cpd11416[c]	Biomass	[]	0
cpd00858[c]	L-Glutamate5-semialdehyde	C5H9NO3	0	C01165
cpd11584[e]	Ala-His	C9H14N4O3	0
cpd11584[c]	Ala-His	C9H14N4O3	0
cpd15527[c]	1,2-dioctadec-11-enoyl-sn-glycerol_3-phosphate	C39H72O8P	-1
cpd02656[c]	6-7-Dimethyl-8-1-D-ribityllumazine	C13H18N4O6	0	C04332
cpd12543[c]	Carboxybiotin-carboxyl-carrier_protein	C18H26N5O6R2S	-1	C04419
cpd11476[c]	hexadecanoyl-acp	C27H51N2O8PRS	-1	C05764
cpd00478[c]	Pyridoxine_phosphate	C8H11NO6P	-1	C00627
cpd15294[c]	Tetradecenoyl-ACP	C25H45N2O8PRS	-1
cpd15668[c]	glycerol_teichoic acid (n=45), linked, D-ala substituted	C326H584N55O304P46R	-48
cpd02775[c]	4-Amino-5-phosphomethyl-2-methylpyrimidine	C6H9N3O4P	-1	C04556
cpd15310[c]	1,2-Diacyl-sn-glycerol_dihexadec-9-enoyl	C35H64O5	0
cpd00152[c]	Agmatine	C5H16N4	2	C00179
cpd00175[c]	UDP-N-acetyl-D-galactosamine	C17H25N3O17P2	-2	C00203
cpd02591[c]	pendp	C25H42O7P2	-2	C04217
cpd02884[c]	FAICAR	C10H14N4O9P	-1	C04734
cpd00481[c]	Isobutyryl-CoA	C25H39N7O17P3S	-3	C00630
cpd00182[e]	Adenosine	C10H13N5O4	0	C00212
cpd00182[c]	Adenosine	C10H13N5O4	0	C00212
cpd11592[e]	gly-glu-L	C7H11N2O5	-1
cpd11592[c]	gly-glu-L	C7H11N2O5	-1
cpd11480[c]	D-3-Hydroxydodecanoyl-[acp]	C23H43N2O9PRS	-1	C05757
cpd00020[c]	Pyruvate	C3H3O3	-1	C00022
cpd15717[c]	Dianteisoheptadecanoylphosphatidylglycerophosphate	C40H78O13P2	-2
cpd02197[c]	5-Formyltetrahydrofolate	C20H21N7O7	-2	C03479
cpd03414[c]	UroporphyrinogenI	C40H36N4O16	-8	C05766
cpd00209[c]	Nitrate	NO3	-1	C00244
cpd00289[c]	Geranylgeranyl_diphosphate	C20H34O7P2	-2	C00353
cpd15675[c]	1-anteisopentadecanoyl-sn-glycerol_3-phosphate	C18H36O7P	-1
cpd00330[c]	Dihydrofolate	C19H19N7O6	-2	C00415
cpd00104[e]	BIOT	C10H15N2O3S	-1	C00120
cpd00104[c]	BIOT	C10H15N2O3S	-1	C00120
cpd11521[c]	5-methyl-3-oxo-hexanoyl-ACP	C18H31N2O9PRS	-1
cpd01914[c]	L-Methionine_S-oxide	C5H11NO3S	0	C02989
cpd03671[c]	D-Glucosamine1-phosphate	C6H14NO8P	0	C06156
cpd00091[c]	UMP	C9H12N2O9P	-1	C00105
cpd00219[c]	Prephenate	C10H8O6	-2	C00254
cpd02843[c]	D-erythro-imidazol-glycerol-phosphate	C6H10N2O6P	-1	C04666
cpd03831[c]	ADP-L-glycero-D-manno-heptose	C17H25N5O16P2	-2	C06398
cpd00485[c]	D-Mannose1-phosphate	C6H12O9P	-1	C00636
cpd03839[c]	Precorrin_5	C45H47N4O17	-7	C06416
cpd11474[c]	Decanoyl-ACP	C21H39N2O8PRS	-1	C05755
cpd00085[c]	beta-Alanine	C3H7NO2	0	C00099
cpd12237[c]	Peptide-L-methionine	C6H10N2O2R2S	0	C03023
cpd00184[e]	Thymidine	C10H14N2O5	0	C00214
cpd00184[c]	Thymidine	C10H14N2O5	0	C00214
cpd00074[c]	S	S	0	C00087
cpd03920[c]	Adenosylcobinamide-GDP	C68H96CoN21O21P2	0	C06510
cpd11531[c]	9-methyl-trans-dec-2-enoyl-ACP	C22H39N2O8PRS	-1
cpd02230[c]	Inositol_4-phosphate	C6H12O9P	-1	C03546
cpd00867[c]	Inositol_1-phosphate	C6H12O9P	-1	C01177
cpd11490[c]	3-oxooctanoyl-acp	C19H33N2O9PRS	-1	C05750
cpd11589[e]	gly-asp-L	C6H9N2O5	-1
cpd11589[c]	gly-asp-L	C6H9N2O5	-1
cpd12005[c]	Lipoylprotein	CHRS2	0	C02051
cpd15767[c]	Isoheptadecanoyllipoteichoic_acid (n=24), linked, N-acetyl-D-glucosamine	C313H548N24O255P24	-24
cpd15326[c]	1-hexadec-9-enoyl-sn-glycerol_3-phosphate	C19H36O7P	-1
cpd11520[c]	isovaleryl-ACP	C16H29N2O8PRS	-1
cpd15667[c]	glycerol_teichoic acid (n=45), linked, unsubstituted	C191H359N10O259P46R	-48
cpd15669[c]	glycerol_teichoic acid (n=45), linked, glucose substituted	C461H809N10O484P46R	-48
cpd00082[c]	D-Fructose	C6H12O6	0	C10906|C01496|C00095|C02336
cpd11517[c]	14-methyl-3-hydroxy-hexa-decanoyl-ACP	C28H53N2O9PRS	-1
cpd00616[c]	Pretyrosine	C10H12NO5	-1	C00826
cpd11468[c]	Dodecanoyl-ACP	C23H43N2O8PRS	-1	C05223
cpd03470[c]	Iminoaspartate	C4H3NO4	-2	C05840
cpd15547[c]	Phosphatidylglycerophosphate_dioctadecanoyl	C42H82O13P2	-2
cpd00755[c]	Hydroxymethylbilane	C40H38N4O17	-8	C01024
cpd03487[c]	Undecaprenyl-diphospho-N-acetylmuramoyl-(N-acetylglucosamine)-L-alanyl-D-glutamyl-L-lysyl-D-alanyl-D-alanine	C94H153N8O26P2	-3
cpd03704[c]	dIMP	C10H12N4O7P	-1	C06196
cpd15545[c]	Phosphatidylglycerophosphate_dihexadecanoyl	C38H74O13P2	-2
cpd02498[c]	2,3-Dihydroxy-isovalerate	C5H9O4	-1	C04039|C04272
cpd15312[c]	1,2-Diacyl-sn-glycerol_dioctadec-11-enoyl	C39H72O5	0
cpd03447[c]	2-Octaprenyl-6-methoxy-1,4-benzoquinone	C47H70O3	0	C05813
cpd02394[c]	GAR	C7H15N2O8P	0	C03838
cpd03480[c]	2-Hydroxyphenylacetate	C8H7O3	-1	C05852
cpd03518[c]	Formamidopyrimidine_nucleoside triphosphate	C10H15N5O15P3	-3	C05922
cpd00477[c]	N-Acetyl-L-glutamate	C7H9NO5	-2	C00624
cpd00135[c]	Homocysteine	C4H9NO2S	0	C05330|C00155
cpd15331[c]	1-tetradecanoyl-sn-glycerol_3-phosphate	C17H34O7P	-1
cpd00251[c]	ADPribose	C15H21N5O14P2	-2
cpd00040[c]	Glyoxalate	C2HO3	-1	C00048
cpd11503[c]	6-methyl-octanoyl-ACP	C20H37N2O8PRS	-1
cpd01270[c]	FMNH2	C17H22N4O9P	-1	C01847
cpd00161[c]	L-Threonine	C4H9NO3	0	C00188
cpd11543[c]	15-methyl-trans-hexa-dec-2-enoyl-ACP	C28H51N2O8PRS	-1
cpd00093[c]	Anthranilate	C7H6NO2	-1	C00108
cpd00689[c]	Porphobilinogen	C10H13N2O4	-1	C00931
cpd15274[c]	Octadecenoyl-CoA	C39H65N7O17P3S	-3
cpd02882[c]	4-1-D-Ribitylamino-5-aminouracil	C9H16N4O6	0	C04732
cpd08287[c]	4-cytidine5-diphospho-2-C-methyl-D-erythritol	C14H23N3O14P2	-2	C11435
cpd15772[c]	Isohexadecanoyllipoteichoic_acid (n=24), linked, N-acetyl-D-glucosamine	C311H544N24O255P24	-24
cpd02740[c]	Guanosine_5-triphosphate,3-diphosphate	C10H13N5O20P5	-5	C04494
cpd00290[c]	D-fructose-1,6-bisphosphate	C6H12O12P2	-2	C00354|C05378
cpd03426[c]	Sirohydrochlorin	C42H38N4O16	-8	C05778
cpd00497[c]	XMP	C10H12N4O9P	-1	C00655
cpd00908[c]	Glycerophosphoethanolamine	C5H14NO6P	0	C01233
cpd00408[c]	Pantoate	C6H11O4	-1	C00522
cpd15674[c]	1-isopentadecanoyl-sn-glycerol_3-phosphate	C18H36O7P	-1
cpd00239[c]	H2S	H2S	0	C00297|C00283
cpd00034[e]	Zn2+	Zn	2	C00038
cpd00034[c]	Zn2+	Zn	2	C00038
cpd00946[c]	Undecaprenyl_diphospho N-acetyl-glucosamine	C63H103NO12P2	-2	C01289
cpd00014[c]	UDP	C9H12N2O12P2	-2	C00015
cpd11502[c]	6-methyl-trans-oct-2-enoyl-ACP	C20H35N2O8PRS	-1
cpd00288[c]	D-Glucosamine_phosphate	C6H14NO8P	0	C00352
cpd15604[e]	Gly-Leu	C8H16N2O3	0
cpd15604[c]	Gly-Leu	C8H16N2O3	0
cpd00626[c]	dTDPglucose	C16H24N2O16P2	-2	C00842
cpd08629[c]	13(1)-Hydroxy-Mg-protoporphyrin_IX 13-monomethyl ester	C35H33N4O5Mg	0	C11829
cpd00123[c]	3-Methyl-2-oxobutanoate	C5H7O3	-1	C00141
cpd00086[c]	Propionyl-CoA	C24H37N7O17P3S	-3	C00100
cpd01651[c]	L-3-Cyanoalanine	C4H6N2O2	0	C02512
cpd11492[c]	Malonyl-acyl-carrierprotein-	C14H22N2O10PRS	-2	C01209
cpd00712[c]	2-Dehydropantoate	C6H9O4	-1	C00966
cpd15311[c]	1,2-Diacyl-sn-glycerol_dioctadecanoyl	C39H76O5	0
cpd00007[e]	O2	O2	0	C00007
cpd00007[c]	O2	O2	0	C00007
cpd11465[c]	But-2-enoyl-[acyl-carrier_protein]	C15H25N2O8PRS	-1	C04246
cpd11536[c]	11-methyl-dodecanoyl-ACP	C24H45N2O8PRS	-1
cpd00043[c]	UDP-galactose	C15H22N2O17P2	-2	C00052
cpd01155[c]	Cadaverine	C5H16N2	2	C01672
cpd08210[c]	ADC	C10H10NO5	-1	C11355
cpd11491[c]	3-oxotetradecanoyl-acp	C25H45N2O9PRS	-1	C05759
cpd01831[c]	4-Imidazoleacetate	C5H5N2O2	-1	C02835
cpd02857[c]	DAHP	C7H11O10P	-2	C04691
cpd01048[e]	Arsenate	HO4As	-2	C01478|C11215
cpd01048[c]	Arsenate	HO4As	-2	C01478|C11215
cpd02920[c]	7,8-Dihydropterin_pyrophosphate	C7H9N5O8P2	-2	C04807
cpd00205[e]	K+	K	1	C00238
cpd00205[c]	K+	K	1	C00238
cpd00229[c]	Glycolaldehyde	C2H4O2	0	C00266
cpd00331[c]	cis-Aconitate	C6H3O6	-3	C00417
cpd00208[c]	LACT	C12H22O11	0	C00243
cpd01646[c]	2-Isopropylmalate	C7H10O5	-2	C02504
cpd00283[c]	Geranyldiphosphate	C10H18O7P2	-2	C00341
cpd00482[c]	2-Phospho-D-glycerate	C3H5O7P	-2	C00631
cpd02295[c]	1-4-Dihydroxy-2-naphthoate	C11H7O4	-1	C03657
cpd00760[c]	2-Methylbutyryl-CoA	C26H41N7O17P3S	-3	C01033|C15980
cpd08371[c]	Cobalt-precorrin_5	C45H47CoN4O16	-5	C11541|C16242
cpd01324[c]	L-Histidinal	C6H10N3O	1	C01929
cpd02886[c]	UDP-3-O-(beta-hydroxymyristoyl)-N-acetylglucosamine	C31H51N3O19P2	-2	C04738
cpd01772[c]	Succinylbenzoate	C11H8O5	-2	C02730
cpd00155[c]	Glycogen	C6O5H10	0	C00182
cpd11479[c]	D-3-Hydroxyhexanoyl-[acp]	C17H31N2O9PRS	-1	C05747
cpd02074[c]	2-Oxo-6-aminocaproate	C6H11NO3	0	C03239
cpd11593[e]	ala-L-asp-L	C7H11N2O5	-1
cpd11593[c]	ala-L-asp-L	C7H11N2O5	-1
cpd15764[c]	Palmitoyllipoteichoic_acid (n=24), linked, N-acetyl-D-glucosamine	C311H544N24O255P24	-24
cpd00794[c]	TRHL	C12H22O11	0	C01083
cpd03494[c]	Undecaprenyl-diphospho-N-acetylmuramoyl-L-alanyl-D-glutamyl-meso-2-6-diaminopimeloyl-D-alanyl-D-alanine	C87H139N7O23P2	-4	C05897
cpd00052[c]	CTP	C9H13N3O14P3	-3	C00063
cpd11539[c]	13-methyl-trans-tetra-dec-2-enoyl-ACP	C26H47N2O8PRS	-1
cpd11313[c]	hemeO	C49H56FeN4O5	-2	C15672
cpd00122[c]	N-Acetyl-D-glucosamine	C8H15NO6	0	C00140
cpd15560[c]	Ubiquinone-8	C49H74O4	0	C17569
cpd00224[e]	L-Arabinose	C5H10O5	0	C00259|C11476
cpd00224[c]	L-Arabinose	C5H10O5	0	C00259|C11476
cpd00118[e]	Putrescine	C4H14N2	2	C00134
cpd00118[c]	Putrescine	C4H14N2	2	C00134
cpd02590[c]	all-trans-Heptaprenyl_diphosphate	C35H58O7P2	-2	C04216
cpd11487[c]	3-oxodecanoyl-acp	C21H37N2O9PRS	-1	C05753
cpd00111[c]	Oxidized_glutathione	C20H30N6O12S2	-2	C00127
cpd00004[c]	NADH	C21H27N7O14P2	-2	C00004
cpd02333[c]	Quinolinate	C7H3NO4	-2	C03722
cpd15716[c]	Diisoheptadecanoylphosphatidylglycerophosphate	C40H78O13P2	-2
cpd02835[c]	UDP-2,3-bis(3-hydroxytetradecanoyl)glucosamine	C43H75N3O20P2	-2	C04652
cpd15327[c]	1-hexadecanoyl-sn-glycerol_3-phosphate	C19H38O7P	-1
cpd00905[c]	Guanosine_3,5-bis(diphosphate)	C10H13N5O17P4	-4	C01228
cpd00073[e]	Urea	CH4N2O	0	C00086
cpd00073[c]	Urea	CH4N2O	0	C00086
cpd11571[c]	3-Hydroxyoctodecanoyl-ACP	C29H55N2O9PRS	-1
cpd02557[c]	Farnesylfarnesylgeraniol	C40H66O7P2	-2	C04146
cpd03830[c]	ADP-D-glycero-D-manno-heptose	C17H25N5O16P2	-2	C06397
cpd15766[c]	Stearoyllipoteichoic_acid (n=24), linked, N-acetyl-D-glucosamine	C315H552N24O255P24	-24
cpd03279[e]	Deoxyinosine	C10H12N4O4	0	C05512
cpd03279[c]	Deoxyinosine	C10H12N4O4	0	C05512
cpd02522[c]	2-Aminoadipate_6-semialdehyde	C6H11NO3	0	C04076
cpd11530[c]	9-methyl-3-hydroxy-decanoyl-ACP	C22H41N2O9PRS	-1
cpd11438[c]	fa4	C15H29O2	-1
cpd03448[c]	2-Octaprenyl-3-methyl-6-methoxy-1,4-benzoquinone	C48H72O3	0	C05814
cpd15325[c]	1-dodecanoyl-sn-glycerol_3-phosphate	C15H30O7P	-1
cpd00179[e]	Maltose	C12H22O11	0	C00208
cpd00179[c]	Maltose	C12H22O11	0	C00208
cpd15770[c]	Isopentadecanoyllipoteichoic_acid (n=24), linked, N-acetyl-D-glucosamine	C309H540N24O255P24	-24
cpd01747[c]	Indole-3-acetamide	C10H10N2O	0	C02693
cpd11432[c]	fa11coa	C38H65N7O17P3S	-3
cpd02961[c]	Dihydroneopterin	C9H13N5O4	0	C04874
cpd00001[e]	H2O	H2O	0	C00001|C01328
cpd00001[c]	H2O	H2O	0	C00001|C01328
cpd00412[e]	Deoxyuridine	C9H12N2O5	0	C00526
cpd00412[c]	Deoxyuridine	C9H12N2O5	0	C00526
cpd00655[c]	Dephospho-CoA	C21H33N7O13P2S	-2	C00882
cpd15703[c]	1,2-Diisotetradecanoyl-sn-glycerol	C31H60O5	0
cpd15685[c]	CDP-1,2-diisotetradecanoylglycerol	C40H71N3O15P2	-2
cpd03214[c]	Phytyl_diphosphate	C20H40O7P2	-2	C05427
cpd02893[c]	5-Phosphoribosyl-4-carboxy-5-aminoimidazole	C9H13N3O9P	-1	C04751
cpd00550[c]	D-Serine	C3H7NO3	0	C00740
cpd11529[c]	9-methyl-3-oxo-decanoyl-ACP	C22H39N2O9PRS	-1
cpd00352[c]	delta1-Piperideine-6-L-carboxylate	C6H8NO2	-1	C00450
cpd01997[c]	Dimethylbenzimidazole	C9H10N2	0	C03114
cpd00367[e]	Cytidine	C9H13N3O5	0	C00475
cpd00367[c]	Cytidine	C9H13N3O5	0	C00475
cpd11564[c]	12-methyl-trans-tridec-2-enoyl-ACP	C25H45N2O8PRS	-1
cpd15605[e]	Gly-Phe	C11H14N2O3	0
cpd15605[c]	Gly-Phe	C11H14N2O3	0
cpd00861[c]	UDP-N-acetyl-D-mannosamine	C17H25N3O17P2	-2	C01170
cpd00105[c]	D-Ribose	C5H10O5	0	C00121
cpd03918[c]	Adenosyl_cobinamide	C58H85CoN16O11	2	C06508
cpd00802[c]	D-fructose-1-phosphate	C6H12O9P	-1	C01094|C02976
cpd00068[c]	ITP	C10H12N4O14P3	-3	C00081
cpd01620[c]	Precorrin_2	C42H40N4O16	-8	C02463
cpd03666[c]	2,5-Diamino-6-(5-triphosphoryl-3,4-trihydroxy-2-oxopentyl)-_amino-4-oxopyrimidine	C9H15N5O14P3	-3	C06148
cpd00202[c]	DMAPP	C5H10O7P2	-2	C00235|C17627
cpd00809[c]	O-Phospho-L-homoserine	C4H9NO6P	-1	C01102
cpd00147[c]	MTA	C11H15N5O3S	0	C00170
cpd15500[c]	Menaquinone_8	C51H72O2	0
cpd02693[c]	3-Isopropylmalate	C7H10O5	-2	C04411
cpd02431[c]	1-Pyrroline-5-carboxylate	C5H6NO2	-1	C03912
cpd00100[c]	Glycerol	C3H8O3	0	C00116
cpd00223[c]	Glycerate	C3H5O4	-1	C00258
cpd02375[c]	Adenylosuccinate	C14H15N5O11P	-3	C03794
cpd00658[c]	Isochorismate	C10H8O6	-2	C00885
cpd00203[c]	1,3-Bisphospho-D-glycerate	C3H6O10P2	-2	C00236
cpd15542[c]	Phosphatidylglycerophosphate_didodecanoyl	C30H58O13P2	-2
cpd04539[c]	2-Amino-3-oxo-4-phosphonooxybutyrate	C4H7NO7P	-1	C07335
cpd00035[c]	L-Alanine	C3H7NO2	0	C00041
cpd02465[c]	tetrahydrodipicolinate	C7H7NO4	-2	C03972
cpd01399[c]	Maltotetraose	C24H42O21	0	C02052
cpd15499[c]	Menaquinol_8	C51H74O2	0
cpd15765[c]	Myristoyllipoteichoic_acid (n=24), linked, N-acetyl-D-glucosamine	C307H536N24O255P24	-24
cpd15665[c]	Peptidoglycan_polymer (n subunits)	C80H125N16O42R	-4
cpd00012[e]	PPi	H2O7P2	-2	C00013
cpd00012[c]	PPi	H2O7P2	-2	C00013
cpd02611[c]	N-Acetyl-D-glucosamine1-phosphate	C8H15NO9P	-1	C04501|C04256
cpd00054[c]	L-Serine	C3H7NO3	0	C00716|C00065
cpd00137[c]	Citrate	C6H5O7	-3	C00158
cpd11509[c]	10-methyl-3-hydroxy-dodecanoyl-ACP	C24H45N2O9PRS	-1
cpd03760[c]	Precorrin_6B	C44H49N4O16	-7	C06319
cpd03584[c]	UDP-3-O-(beta-hydroxymyristoyl)-D-glucosamine	C29H50N3O18P2	-1	C06022
cpd11544[c]	15-methyl-hexa-decanoyl-ACP	C28H53N2O8PRS	-1
cpd15423[c]	CDP-1,2-ditetradecanoylglycerol	C40H71N3O15P2	-2
cpd11514[c]	12-methyl-trans-tetra-dec-2-enoyl-ACP	C26H47N2O8PRS	-1
cpd08631[c]	Divinylprotochlorophyllide	C35H28N4O5Mg	-1	C11831
cpd11830[c]	S-Aminomethyldihydrolipoylprotein	C2H7NRS2	1	C01242
cpd08370[c]	Cobalt-precorrin_4	C44H44CoN4O16	-6	C11540
cpd01012[e]	Cd2+	Cd	2	C01413
cpd01012[c]	Cd2+	Cd	2	C01413
cpd00287[c]	3-Oxo-2-methylpropanoate	C4H5O3	-1	C00349|C06002
cpd00025[c]	H2O2	H2O2	0	C00027
cpd11574[e]	Molybdate	H2MoO4	0	C06232
cpd11574[c]	Molybdate	H2MoO4	0	C06232
cpd11464[c]	Butyryl-ACP	C15H27N2O8PRS	-1	C05745
cpd00293[c]	N-Acetyl-D-glucosamine_6-phosphate	C8H15NO9P	-1	C00357
cpd00810[c]	Orotidylic_acid	C10H11N2O11P	-2	C01103
cpd00121[c]	L-Inositol	C6H12O6	0	C00137|C06151
cpd01449[c]	Chlorophyllide	C35H33N4O5Mg	0	C02139
cpd00531[e]	Hg2+	Hg	2	C00703
cpd00531[c]	Hg2+	Hg	2	C00703
cpd00446[c]	cAMP	C10H11N5O6P	-1	C00575
cpd00931[c]	5-Amino-6-5-phosphoribosylaminouracil	C9H14N4O9P	-1	C01268
cpd01441[c]	Acetyl-maltose	C14H24O12	0	C02130
cpd00510[c]	deoxyribose-5-phosphate	C5H10O7P	-1	C00673
cpd01923[c]	N-Acetylmuramoyl-Ala	C14H23N2O9	-1	C02999
cpd11542[c]	15-methyl-3-hydroxy-hexa-decanoyl-ACP	C28H53N2O9PRS	-1
cpd02720[c]	5-Amino-6-5-phosphoribitylaminouracil	C9H16N4O9P	-1	C04454
cpd03607[c]	4-(Phosphonooxy)-threonine	C4H9NO7P	-1	C06055
cpd00072[c]	D-fructose-6-phosphate	C6H12O9P	-1	C05345|C00085
cpd00061[c]	Phosphoenolpyruvate	C3H3O6P	-2	C00074
cpd11501[c]	6-methyl-3-hydroxy-octanoyl-ACP	C20H37N2O9PRS	-1
cpd11563[c]	12-methyl-3-hydroxy-tridecanoyl-ACP	C25H47N2O9PRS	-1
cpd11555[c]	8-methyl-3-hydroxy-nonanoyl-ACP	C21H39N2O9PRS	-1
cpd11565[c]	12-methyl-tridecanoyl-ACP	C25H47N2O8PRS	-1
cpd00338[c]	5-Aminolevulinate	C5H9NO3	0	C00430
cpd00525[c]	UDP-N-acetylmuramoyl-L-alanyl-D-glutamate	C28H39N5O23P2	-4	C00692
cpd11493[c]	ACP	C11H21N2O7PRS	-1	C00229
cpd01329[e]	Maltohexaose	C36H62O31	0	C01936
cpd01329[c]	Maltohexaose	C36H62O31	0	C01936
cpd11581[e]	gly-asn-L	C6H11N3O4	0
cpd11581[c]	gly-asn-L	C6H11N3O4	0
cpd01092[c]	Allantoin	C4H6N4O3	0	C01551|C02350
cpd00764[c]	7-8-Diaminononanoate	C9H21N2O2	1	C01037
cpd01078[c]	Selenide	H2Se	0	C01528
cpd00492[c]	N-Acetyl-D-mannosamine	C8H15NO6	0	C00645
cpd02654[c]	4-Methyl-5-2-phosphoethyl-thiazole	C6H9NO4PS	-1	C04327
cpd00008[c]	ADP	C10H13N5O10P2	-2	C00008
cpd02201[c]	4-phosphopantothenate	C9H16NO8P	-2	C03492
cpd03049[c]	2-Hydroxyethyl-ThPP	C14H21N4O8P2S	-1	C05125
cpd00327[c]	strcoa	C39H67N7O17P3S	-3	C00412
cpd15771[c]	Anteisopentadecanoyllipoteichoic_acid (n=24), linked, N-acetyl-D-glucosamine	C309H540N24O255P24	-24
cpd03608[c]	4-Hydroxy-L-threonine	C4H9NO4	0	C06056
cpd11533[c]	11-methyl-3-oxo-dodecanoyl-ACP	C24H43N2O9PRS	-1
cpd00249[e]	Uridine	C9H12N2O6	0	C00299
cpd00249[c]	Uridine	C9H12N2O6	0	C00299
cpd00507[c]	Glycerophosphocholine	C8H20NO6P	0	C00670
cpd03527[c]	N-(omega)-Hydroxyarginine	C6H14N4O3	0	C05933
cpd00971[e]	Na+	Na	1	C01330
cpd00971[c]	Na+	Na	1	C01330
cpd00268[e]	H2S2O3	O3S2	-2	C05529|C00320
cpd00268[c]	H2S2O3	O3S2	-2	C05529|C00320
cpd00516[c]	meso-2,6-Diaminopimelate	C7H14N2O4	0	C00680
cpd01298[c]	Aminoacetone	C3H8NO	1	C01888
cpd03917[c]	Adenosylcobyric_acid	C55H77CoN15O11	1	C06507
cpd01587[c]	5-Methylcytosine	C5H7N3O	0	C02376
cpd11558[c]	10-methyl-3-oxo-undecanoyl-ACP	C23H41N2O9PRS	-1
cpd00654[e]	Deoxycytidine	C9H13N3O4	0	C00881
cpd00654[c]	Deoxycytidine	C9H13N3O4	0	C00881
cpd00098[c]	Choline	C5H14NO	1	C00114
cpd02021[c]	Succinylbenzoyl-CoA	C32H40N7O20P3S	-4	C03160
cpd00911[c]	6-phospho-D-glucono-1-5-lactone	C6H10O9P	-1	C01236
cpd01977[c]	4-Phospho-L-aspartate	C4H7NO7P	-1	C03082
cpd11431[c]	fa11	C17H33O2	-1
cpd15328[c]	1-octadec-11-enoyl-sn-glycerol_3-phosphate	C21H40O7P	-1
cpd08368[c]	Cobalt-precorrin_2	C42H40CoN4O16	-6	C11538
cpd00235[c]	D-mannose-6-phosphate	C6H12O9P	-1	C00275
cpd00106[c]	Fumarate	C4H2O4	-2	C00122
cpd11523[c]	5-methyl-trans-hex-2-enoyl-ACP	C18H31N2O8PRS	-1
cpd00060[c]	L-Methionine	C5H11NO2S	0	C00073|C01733
cpd00048[e]	Sulfate	O4S	-2	C00059
cpd00048[c]	Sulfate	O4S	-2	C00059
cpd00036[c]	Succinate	C4H4O4	-2	C00042
cpd11255[c]	1,2-dihydroxy-3-keto-5-methylthiopentene	C6H9O3S	-1	C15606
cpd11508[c]	10-methyl-3-oxo-dodecanoyl-ACP	C24H43N2O9PRS	-1
cpd08615[c]	1-Hydroxy-2-methyl-2-butenyl_4-diphosphate	C5H10O8P2	-2	C11811
cpd11489[c]	3-oxododecanoyl-acp	C23H41N2O9PRS	-1	C05756
cpd02147[c]	4-Phosphoerythronate	C4H7O8P	-2	C03393
cpd03124[c]	Hexanoyl-CoA	C27H43N7O17P3S	-3	C05270
cpd00136[c]	4-Hydroxybenzoate	C7H5O3	-1	C00156
cpd00731[c]	Ala-Ala	C6H12N2O3	0	C00993
cpd11482[c]	(R)-3-Hydroxydecanoyl-[acyl-carrier_protein]	C21H39N2O9PRS	-1	C04619
cpd00186[c]	D-Glutamate	C5H8NO4	-1	C00217
cpd02069[c]	3-Phosphonooxypyruvate	C3H3O7P	-2	C03232
cpd11477[c]	(2E)-Hexadecenoyl-[acp]	C27H49N2O8PRS	-1	C05763
cpd17041[c]	Protein_biosynthesis	[]	0
cpd11562[c]	12-methyl-3-oxo-tridecanoyl-ACP	C25H45N2O9PRS	-1
cpd15378[c]	4-Hydroxy-benzylalcohol	C7H8O2	0
cpd15754[c]	Isohexadecanoyllipoteichoic_acid (n=24), linked, unsubstituted	C119H232O135P24	-24
cpd00024[c]	2-Oxoglutarate	C5H4O5	-2	C00026
cpd00232[c]	Neu5Ac	C11H18NO9	-1	C00270
cpd00309[c]	XAN	C5H4N4O2	0	C00385
cpd02642[c]	N-5-phosphoribosyl-anthranilate	C12H14NO9P	-2	C04302
cpd00002[c]	ATP	C10H13N5O13P3	-3	C00002
cpd15420[c]	CDP-1,2-dioctadec-11-enoylglycerol	C48H83N3O15P2	-2
cpd11225[c]	3-4-dihydroxy-2-butanone4-phosphate	C4H8O6P	-1	C15556
cpd08373[c]	Cobalt-precorrin_6B	C44H48CoN4O16	-6	C11543
cpd11547[c]	4-methyl-3-hydroxy-pentanoyl-ACP	C17H31N2O9PRS	-1
cpd11507[c]	8-methyl-decanoyl-ACP	C22H41N2O8PRS	-1
cpd15543[c]	Phosphatidylglycerophosphate_ditetradecanoyl	C34H66O13P2	-2
cpd00019[c]	S-Adenosyl-homocysteine	C14H20N6O5S	0	C00021
cpd00869[c]	4-methylthio_2-oxobutyrate	C5H7O3S	-1	C01180
cpd00254[e]	Mg	Mg	2	C00305
cpd00254[c]	Mg	Mg	2	C00305
cpd11481[c]	R-3-hydroxypalmitoyl-acyl-carrierprotein-	C27H51N2O9PRS	-1	C04633
cpd00157[c]	Glycerone	C3H6O3	0	C00184
cpd01080[c]	ocdca	C18H35O2	-1	C01530
cpd11546[c]	4-methyl-3-oxo-pentanoyl-ACP	C17H29N2O9PRS	-1
cpd11554[c]	8-methyl-3-oxo-nonanoyl-ACP	C21H37N2O9PRS	-1
cpd00149[e]	Co2+	Co	2	C00175
cpd00149[c]	Co2+	Co	2	C00175
cpd02612[c]	N-Acetylmannosamine_6-phosphate	C8H15NO9P	-1	C04257
cpd00438[e]	Deoxyadenosine	C10H13N5O3	0	C00559
cpd00438[c]	Deoxyadenosine	C10H13N5O3	0	C00559
cpd03114[c]	3-Oxopalmitoyl-CoA	C37H61N7O18P3S	-3	C05259
cpd11583[e]	Ala-Leu	C9H18N2O3	0
cpd11583[c]	Ala-Leu	C9H18N2O3	0
cpd00146[c]	Carbamoylphosphate	CH3NO5P	-1	C00169
cpd00101[c]	ribose-5-phosphate	C5H10O8P	-1	C03736|C00117
cpd00083[c]	GDP-mannose	C16H23N5O16P2	-2	C00096
cpd00830[c]	4-Hydroxy-2-oxoglutarate	C5H4O6	-2	C05946|C01127
cpd00873[c]	Nicotinate_ribonucleotide	C11H13NO9P	-1	C01185
cpd00214[c]	Palmitate	C16H31O2	-1	C00249
cpd02120[c]	Dihydrodipicolinate	C7H5NO4	-2	C03340
cpd00011[e]	CO2	CO2	0	C00011
cpd00011[c]	CO2	CO2	0	C00011
cpd00095[c]	Glycerone-phosphate	C3H6O6P	-1	C00111
cpd11515[c]	12-methyl-tetra-decanoyl-ACP	C26H49N2O8PRS	-1
cpd00080[c]	Glycerol-3-phosphate	C3H8O6P	-1	C00623|C00093
cpd03492[c]	Undecaprenyl-diphospho-N-acetylmuramoyl-(N-acetylglucosamine)-L-alanyl-D-isoglutaminyl-L-lysyl-D-alanyl-D-alanine	C94H155N9O25P2	-2	C05894
cpd00906[c]	all-trans-Hexaprenyl_diphosphate	C30H50O7P2	-2	C01230
cpd01335[c]	Octanoyl-CoA	C29H47N7O17P3S	-3	C01944
cpd08928[c]	L-Threonine_phosphate	C4H9NO6P	-1	C12147
cpd15684[c]	CDP-1,2-dianteisoheptadecanoylglycerol	C46H83N3O15P2	-2
cpd00222[c]	GLCN	C6H11O7	-1	C00257
cpd08630[c]	13(1)-Oxo-Mg-protoporphyrin_IX 13-monomethyl ester	C35H31N4O5Mg	0	C11830
cpd01845[c]	Protochlorophyllide	C35H30N4O5Mg	-1	C02880
cpd00504[c]	LL-2,6-Diaminopimelate	C7H14N2O4	0	C00666
cpd15666[c]	Peptidoglycan_polymer (n-1 subunits)	C40H63N8O21R	-2
cpd15718[c]	Diisotetradecanoylphosphatidylglycerophosphate	C34H66O13P2	-2
cpd00241[c]	dGTP	C10H13N5O13P3	-3	C00286
cpd02605[c]	2-isopropyl-3-oxosuccinate	C7H8O5	-2	C04236
cpd11494[c]	Acetyl-ACP	C13H23N2O8PRS	-1	C03939
cpd03560[c]	Propionyladenylate	C13H17N5O8P	-1	C05983
cpd00071[c]	Acetaldehyde	C2H4O	0	C00084
cpd00130[c]	L-Malate	C4H4O5	-2	C00711|C00149
cpd03451[c]	SHCHC	C11H10O6	-2	C05817
cpd00026[c]	UDP-glucose	C15H22N2O17P2	-2	C00029
cpd03128[c]	Decanoyl-CoA	C31H51N7O17P3S	-3	C05274
cpd00342[c]	N-Acetylornithine	C7H14N2O3	0	C00437
cpd15419[c]	CDP-1,2-dihexadecanoylglycerol	C44H79N3O15P2	-2
cpd01017[e]	Cys-Gly	C5H10N2O3S	0	C01419
cpd01017[c]	Cys-Gly	C5H10N2O3S	0	C01419
cpd15561[c]	Ubiquinol-8	C49H76O4	0
cpd00028[c]	Heme	C34H30FeN4O4	-2	C00032
cpd11500[c]	6-methyl-3-oxo-octanoyl-ACP	C20H35N2O9PRS	-1
cpd15238[c]	Hexadecenoyl-CoA	C37H61N7O17P3S	-3
cpd00349[c]	Sedoheptulose_1,7-bisphosphate	C7H14O13P2	-2	C00447
cpd02030[c]	3-phosphoshikimate	C7H9O8P	-2	C03175
cpd00508[c]	3MOP	C6H9O3	-1	C03465|C00671
cpd00010[c]	CoA	C21H33N7O16P3S	-3	C00010
cpd01567[c]	(R)-Allantoin	C4H6N4O3	0	C02348
cpd00044[c]	3-phosphoadenylylsulfate	C10H12N5O13P2S	-3	C00053
cpd11434[c]	fa12coa	C38H65N7O17P3S	-3
cpd03078[c]	Selenophosphate	HO3PSe	-2	C05172
cpd00006[c]	NADP	C21H26N7O17P3	-2	C00006
cpd08632[c]	Divinyl_chlorophyllide a	C35H31N4O5Mg	0	C11832
cpd15663[c]	Prenol-45n_teichoic acid-alanine substituted	C341H611N47O287P47	-47
cpd11499[c]	4-methyl-hexanoyl-ACP	C18H33N2O8PRS	-1
cpd00200[c]	4MOP	C6H9O3	-1	C00233
cpd00141[c]	Propionate	C3H5O2	-1	C00163
cpd01665[c]	D-O-Phosphoserine	C3H7NO6P	-1	C02532
cpd00056[c]	TPP	C12H17N4O7P2S	-1	C00068
cpd00954[c]	6-hydroxymethyl_dihydropterin	C7H9N5O2	0	C01300
cpd01749[c]	N-Formylkynurenine	C11H12N2O4	0	C02700
cpd11545[c]	isobutyryl-ACP	C15H27N2O8PRS	-1
cpd15603[e]	Gly-Cys	C5H10N2O3S	0
cpd15603[c]	Gly-Cys	C5H10N2O3S	0
cpd00079[c]	D-glucose-6-phosphate	C6H12O9P	-1	C00668|C00092
cpd00644[c]	PAN	C9H16NO5	-1	C00864
cpd01844[c]	Propionyl_phosphate	C3H6O5P	-1	C02876
cpd03420[c]	Precorrin_3A	C43H44N4O16	-6	C05772
cpd02152[c]	L-Argininosuccinate	C10H17N4O6	-1	C03406
cpd00279[c]	Acetoacetyl-CoA	C25H37N7O18P3S	-3	C00332
cpd15495[c]	Maltopentaose	C30H52O26	0
cpd00023[c]	L-Glutamate	C5H8NO4	-1	C00025|C00302
cpd00018[c]	AMP	C10H13N5O7P	-1	C00020
cpd03495[c]	Undecaprenyl-diphospho-N-acetylmuramoyl-N-acetylglucosamine-L-ala-D-glu-meso-2-6-diaminopimeloyl-D-ala-D-ala	C95H152N8O28P2	-4	C05898
cpd02211[c]	L-2-Amino-acetoacetate	C4H7NO3	0	C03508
cpd15683[c]	CDP-1,2-diisoheptadecanoylglycerol	C46H83N3O15P2	-2
cpd15680[c]	1,2-diisopentadecanoyl-sn-glycerol_3-phosphate	C33H64O8P	-1
cpd08369[c]	Cobalt-precorrin_3	C43H42CoN4O16	-6	C11539
cpd03421[c]	Cobyrinate	C45H53CoN4O14	-5	C05773
cpd03897[c]	4a-Hydroxytetrahydrobiopterin	C9H15N5O4	0	C15522
cpd00171[c]	D-Ribulose5-phosphate	C5H10O8P	-1	C00199
cpd00114[c]	IMP	C10H12N4O8P	-1	C00130
cpd00356[c]	dCTP	C9H13N3O13P3	-3	C00458
cpd00773[c]	UDP-MurNAc	C20H28N3O19P2	-3	C01050
cpd01217[c]	Xanthosine	C10H12N4O6	0	C01762
cpd00102[c]	Glyceraldehyde3-phosphate	C3H6O6P	-1	C00118|C00661
cpd00064[c]	Ornithine	C5H13N2O2	1	C00077|C01602
cpd11495[c]	2-methylbutyryl-ACP	C16H29N2O8PRS	-1
cpd03052[c]	Imidazole_acetaldehyde	C5H6N2O	0	C05130
cpd11295[c]	2,3-diketo5-methylthio-1-phosphopentane	C6H10O6PS	-1	C15650
cpd00089[c]	Glucose-1-phosphate	C6H12O9P	-1	C00103
cpd11532[c]	9-methyl-decanoyl-ACP	C22H41N2O8PRS	-1
cpd00274[c]	Citrulline	C6H13N3O3	0	C00327
cpd00506[c]	gamma-Glutamylcysteine	C8H13N2O5S	-1	C00669
cpd15753[c]	Anteisopentadecanoyllipoteichoic_acid (n=24), linked, unsubstituted	C117H228O135P24	-24
cpd02574[c]	methylthioribose-1-phosphate	C6H12O7PS	-1	C04188
cpd02904[c]	alpha-Ribazole_5-phosphate	C14H18N2O7P	-1	C04778
cpd00532[c]	O2-	HO2	0	C00704
cpd01311[c]	Dethiobiotin	C10H17N2O3	-1	C01909
cpd00030[e]	Mn2+	Mn	2	C00034
cpd00030[c]	Mn2+	Mn	2	C00034
cpd11522[c]	5-methyl-3-hydroxy-hexanoyl-ACP	C18H33N2O9PRS	-1
cpd08372[c]	Cobalt-precorrin_6	C44H46CoN4O16	-6	C11542
cpd00311[c]	Guanosine	C10H13N5O5	0	C00387
cpd00125[c]	5-10-Methylenetetrahydrofolate	C20H21N7O6	-2	C00143
cpd11570[c]	3-Oxooctodecanoyl-ACP	C29H53N2O9PRS	-1
cpd01710[c]	2-Isopropylmaleate	C7H8O4	-2	C02631
cpd02083[c]	CoproporphyrinogenIII	C36H40N4O8	-4	C03263
cpd00084[c]	L-Cysteine	C3H7NO2S	0	C00097
cpd11467[c]	(2E)-Tetradecenoyl-[acp]	C25H45N2O8PRS	-1	C05760
cpd08211[c]	trans,trans,cis-Geranylgeranyl_diphosphate	C20H34O7P2	-2	C11356
cpd01695[c]	Myristoyl-CoA	C35H59N7O17P3S	-3	C02593
cpd03416[c]	CoproporphyrinogenI	C36H40N4O8	-4	C05768
cpd03117[c]	3-Oxododecanoyl-CoA	C33H53N7O18P3S	-3	C05263
cpd01157[c]	Chitobiose	C16H28N2O11	0	C01674
cpd00166[c]	Calomide	C72H101CoN18O17P	1	C00194
cpd03211[c]	15-cis-Phytoene	C40H64	0	C05421
cpd00115[c]	dATP	C10H13N5O12P3	-3	C00131
cpd11548[c]	4-methyl-trans-pent-2-enoyl-ACP	C17H29N2O8PRS	-1
cpd15746[c]	Palmitoyllipoteichoic_acid (n=24), linked, unsubstituted	C119H232O135P24	-24
cpd00051[c]	L-Arginine	C6H15N4O2	1	C00062|C02385
cpd15688[c]	CDP-1,2-diisohexadecanoylglycerol	C44H79N3O15P2	-2
cpd12225[c]	Dihydrolipolprotein	CH3RS2	0	C02972
cpd03916[c]	Adenosyl_cobyrinate diamide	C55H69CoN11O15	-3	C06506
cpd11550[c]	6-methyl-3-oxo-heptanoyl-ACP	C19H33N2O9PRS	-1
cpd00286[c]	Undecaprenylphosphate	C55H90O4P	-1	C17556|C00348
cpd11567[c]	14-methyl-3-hydroxy-pentadecanoyl-ACP	C27H51N2O9PRS	-1
cpd03443[c]	3-Octaprenyl-4-hydroxybenzoate	C47H69O3	-1	C05809
cpd00109[c]	Cytochrome_c3+	C42H52FeN8O6S2	5	C01070|C00125
cpd00264[e]	Spermidine	C7H22N3	3	C00315
cpd00264[c]	Spermidine	C7H22N3	3	C00315
cpd03835[c]	Precorrin_8	C45H53N4O14	-7	C06408
cpd00448[c]	D-Glyceraldehyde	C3H6O3	0	C00577
cpd00922[c]	delta1-Piperideine-2-carboxylate	C6H8NO2	-1	C04092
cpd00641[c]	L-Histidinol	C6H12N3O	1	C00860
cpd15522[c]	1,2-ditetradecanoyl-sn-glycerol_3-phosphate	C31H60O8P	-1
cpd00099[e]	Cl-	Cl	-1	C00698|C01327
cpd00099[c]	Cl-	Cl	-1	C00698|C01327
cpd02921[c]	SAICAR	C13H16N4O12P	-3	C04823|C04811
cpd04918[c]	D-Glycero-D-manno-heptose7-phosphate	C7H14O10P	-1	C07836
cpd00218[c]	Niacin	C6H4NO2	-1	C00253
cpd03491[c]	Undecaprenyl-diphospho-N-acetylmuramoyl-(N-acetylglucosamine)-L-alanyl-gamma-D-glutamyl-L-lysyl-D-alanyl-D-alanine	C94H153N8O26P2	-3	C05893
cpd01777[c]	Phosphoribosyl-AMP	C15H21N5O14P2	-2	C02741
cpd00277[e]	Deoxyguanosine	C10H13N5O4	0	C00330
cpd00277[c]	Deoxyguanosine	C10H13N5O4	0	C00330
cpd00047[c]	Formate	CHO2	-1	C00058
cpd10516[e]	fe3	Fe	3	C14819
cpd10516[c]	fe3	Fe	3	C14819
cpd02930[c]	Lipid_X	C34H65NO12P	-1	C04824
cpd02894[c]	4-Amino-2-methyl-5-diphosphomethylpyrimidine	C6H9N3O7P2	-2	C04752
cpd00978[c]	dUDP	C9H12N2O11P2	-2	C01346
cpd17043[c]	RNA_transcription	[]	0
cpd11525[c]	7-methyl-3-oxo-octanoyl-ACP	C20H35N2O9PRS	-1
cpd03091[c]	5-Deoxyadenosine	C10H13N5O3	0	C05198
cpd02124[c]	2-Methylacetoacetyl-CoA	C26H39N7O18P3S	-3	C03344
cpd15239[c]	Hexadecenoyl-ACP	C27H49N2O8PRS	-1
cpd00699[c]	5-Dehydroquinate	C7H9O6	-1	C00944
cpd11471[c]	(2E)-Octenoyl-[acp]	C19H33N2O8PRS	-1	C05751
cpd11640[c]	H2	H2	0	C00282
cpd00793[e]	Thiamine_phosphate	C12H17N4O4PS	0	C01081
cpd00793[c]	Thiamine_phosphate	C12H17N4O4PS	0	C01081
cpd00220[c]	Riboflavin	C17H20N4O6	0	C00255
cpd00062[c]	UTP	C9H12N2O15P3	-3	C00075
cpd15308[c]	1,2-Diacyl-sn-glycerol_ditetradec-7-enoyl	C31H56O5	0
cpd00322[e]	L-Isoleucine	C6H13NO2	0	C00407
cpd00322[c]	L-Isoleucine	C6H13NO2	0	C00407
cpd00668[c]	ALCTT	C5H7O4	-1	C06010|C00900
cpd15682[c]	1,2-diisohexadecanoyl-sn-glycerol_3-phosphate	C35H68O8P	-1
cpd00017[c]	S-Adenosyl-L-methionine	C15H23N6O5S	1	C00019
cpd00294[c]	dAMP	C10H13N5O6P	-1	C00360
cpd00069[c]	L-Tyrosine	C9H11NO3	0	C00082|C01536
cpd11572[c]	trans-Octodec-2-enoyl-ACP	C29H53N2O8PRS	-1
cpd00918[c]	2-Acetamido-5-oxopentanoate	C7H10NO4	-1	C01250
cpd01775[c]	Phosphoribosyl-ATP	C15H21N5O20P4	-4	C02739
cpd00022[c]	Acetyl-CoA	C23H35N7O17P3S	-3	C00024
cpd00063[e]	Ca2+	Ca	2	C00076
cpd00063[c]	Ca2+	Ca	2	C00076
cpd00046[c]	CMP	C9H13N3O8P	-1	C00055
cpd00027[e]	D-Glucose	C6H12O6	0	C00267|C00293|C00031
cpd00027[c]	D-Glucose	C6H12O6	0	C00267|C00293|C00031
cpd00170[c]	Gluconolactone	C6H10O6	0	C00198|C16581|C16830
cpd00350[c]	Farnesyldiphosphate	C15H26O7P2	-2	C00448
cpd15749[c]	Isoheptadecanoyllipoteichoic_acid (n=24), linked, unsubstituted	C121H236O135P24	-24
cpd15525[c]	1,2-dihexadec-9-enoyl-sn-glycerol_3-phosphate	C35H64O8P	-1
cpd11472[c]	Hexanoyl-ACP	C17H31N2O8PRS	-1	C05749
cpd03444[c]	2-Octaprenylphenol	C46H70O	0	C05810
cpd00159[e]	L-Lactate	C3H5O3	-1	C00186
cpd00159[c]	L-Lactate	C3H5O3	-1	C00186
cpd00070[c]	Malonyl-CoA	C24H34N7O19P3S	-4	C00083
cpd00015[c]	FAD	C27H31N9O15P2	-2	C00016
cpd03496[c]	Undecaprenyl-diphospho-N-acetylmuramoyl-(N-acetylglucosamine)-L-alanyl-D-glutaminyl-meso-2,6-diaminopimeloyl-D-alanyl-D-alanine	C95H154N9O27P2	-3
cpd02666[c]	(R)-4-Phosphopantothenoyl-L-cysteine	C12H21N2O9PS	-2	C04352
cpd00003[c]	NAD	C21H26N7O14P2	-1	C00003
cpd00774[c]	UroporphyrinogenIII	C40H36N4O16	-8	C01051
cpd00957[c]	2,5-Diamino-6-(5-phosphoribosylamino)-4-pyrimidineone	C9H15N5O8P	-1	C01304
cpd15751[c]	Isotetradecanoyllipoteichoic_acid (n=24), linked, unsubstituted	C115H224O135P24	-24
cpd15752[c]	Isopentadecanoyllipoteichoic_acid (n=24), linked, unsubstituted	C117H228O135P24	-24
cpd01260[c]	Lauroyl-CoA	C33H55N7O17P3S	-3	C01832
cpd00418[c]	NO	NO	0	C00533
cpd00031[c]	GDP	C10H13N5O11P2	-2	C00035
cpd00090[c]	IDP	C10H12N4O11P2	-2	C00104
cpd03148[c]	Chlorophyll_a	C55H71N4O5Mg	0	C05306
cpd11439[c]	fa4coa	C36H61N7O17P3S	-3
cpd00347[c]	5-10-Methenyltetrahydrofolate	C20H20N7O6	-1	C00445
cpd00156[e]	L-Valine	C5H11NO2	0	C00183
cpd00156[c]	L-Valine	C5H11NO2	0	C00183
cpd03915[c]	Cob(I)yrinate_diamide	C45H57CoN6O12	-4	C06505
cpd00201[c]	10-Formyltetrahydrofolate	C20H21N7O7	-2	C00234
cpd11433[c]	fa12	C17H33O2	-1
cpd15662[c]	Prenol-45n_teichoic acid-glucose substituted	C476H836N2O467P47	-47
cpd00307[c]	Cytosine	C4H5N3O	0	C00380
cpd00180[c]	Oxalate	C2O4	-2	C00209
cpd11512[c]	12-methyl-3-oxo-tetra-decanoyl-ACP	C26H47N2O9PRS	-1
cpd11561[c]	10-methyl-undecanoyl-ACP	C23H43N2O8PRS	-1
cpd11582[e]	ala-L-Thr-L	C7H14N2O4	0
cpd11582[c]	ala-L-Thr-L	C7H14N2O4	0
cpd15521[c]	1,2-didodecanoyl-sn-glycerol_3-phosphate	C27H52O8P	-1
cpd02711[c]	2-Keto-3-deoxy-6-phosphogluconate	C6H9O9P	-2	C04442
cpd15422[c]	CDP-1,2-ditetradec-7-enoylglycerol	C40H67N3O15P2	-2
cpd15678[c]	1,2-dianteisoheptadecanoyl-sn-glycerol_3-phosphate	C37H72O8P	-1
cpd03422[c]	Cobinamide	C48H73CoN11O8	3	C05774
cpd00078[c]	Succinyl-CoA	C25H36N7O19P3S	-4	C00091
cpd03761[c]	Precorrin_6A	C44H47N4O16	-7	C06320
cpd02991[c]	phosphoribulosylformimino-AICAR-phosphate	C15H23N5O15P2	-2	C04916
cpd10162[c]	(R)-3-Hydroxy-3-methyl-2-oxopentanoate	C6H9O4	-1	C14463
cpd00834[c]	Phosphopantetheine	C11H22N2O7PS	-1	C01134
cpd00216[c]	Chorismate	C10H8O6	-2	C00251
cpd11912[c]	tRNA-Glu	C10H12N5O3R	0	C01641
cpd02535[c]	2,3-Dihydroxy-3-methylvalerate	C6H11O4	-1	C04104|C06007
cpd09410[c]	Demethylphylloquinone	C30H44O2	0	C13309
cpd00930[c]	imidazole_acetol-phosphate	C6H8N2O5P	-1	C01267
cpd11296[c]	2-Hydroxy-3-keto-5-methylthiopentenyl-1-phosphate	C6H9O6PS	-2	C15651
cpd00144[c]	UDPglucuronate	C15H19N2O18P2	-3	C00167
cpd02536[c]	Muconolactone	C6H5O4	-1	C04105|C14610
cpd00236[c]	D-Erythrose4-phosphate	C4H8O7P	-1	C00279
cpd11524[c]	5-methyl-hexanoyl-ACP	C18H33N2O8PRS	-1
cpd00863[c]	beta-D-Glucose_6-phosphate	C6H12O9P	-1	C01172
cpd11585[e]	L-alanylglycine	C5H10N2O3	0
cpd11585[c]	L-alanylglycine	C5H10N2O3	0
cpd17042[c]	DNA_replication	[]	0
cpd00038[c]	GTP	C10H13N5O14P3	-3	C00044
cpd11473[c]	(2E)-Hexenoyl-[acp]	C17H29N2O8PRS	-1	C05748
cpd00383[c]	Shikimate	C7H9O5	-1	C00493
cpd15417[c]	CDP-1,2-didodecanoylglycerol	C36H63N3O15P2	-2
cpd00295[c]	dGDP	C10H13N5O10P2	-2	C00361
cpd15329[c]	1-octadecanoyl-sn-glycerol_3-phosphate	C21H42O7P	-1
cpd15485[c]	heptosyl-kdo2-lipidA	C117H210N2O45P2	-4
cpd08449[c]	3-Amino-2-oxopropyl_phosphate	C3H8NO5P	0	C11638
cpd11506[c]	8-methyl-trans-dec-2-enoyl-ACP	C22H39N2O8PRS	-1
cpd00977[c]	dITP	C10H12N4O13P3	-3	C01345
cpd11559[c]	10-methyl-3-hydroxy-undecanoyl-ACP	C23H43N2O9PRS	-1
cpd15671[c]	1-isoheptadecanoyl-sn-glycerol_3-phosphate	C20H40O7P	-1
cpd01476[c]	Protoporphyrin	C34H32N4O4	-2	C02191
cpd00522[c]	dTDP-4-oxo-L-rhamnose	C16H22N2O15P2	-2	C00688
cpd00199[c]	4-Oxobutanoate	C4H5O3	-1	C00232
cpd03834[c]	Precorrin_4	C44H45N4O17	-7	C06407
cpd14960[c]	Cobalt-precorrin_5B	C43H44CoN4O16	-6	C16243
cpd15747[c]	Myristoyllipoteichoic_acid (n=24), linked, unsubstituted	C115H224O135P24	-24
cpd00246[e]	Inosine	C10H12N4O5	0	C00294
cpd00246[c]	Inosine	C10H12N4O5	0	C00294
cpd04097[e]	Pb_Pb	Pb	2	C06696
cpd04097[c]	Pb_Pb	Pb	2	C06696
photonI[e]	Photon of 700 spectra	[]	0
photonII[e]	Photon of 680 spectra	[]	0
H[t]	proton in the thykaloid	H	-1
cpd12265[c]	Oxidized plastocyanin(PC)	R	10000000	C03162
cpd12239[c]	Reduced plastocyanin(PC*)	R	10000000	C03025
cpd08993[c]	Aminofructose 6-phosphate	C6H14NO8P	0	C12214
cpd08994[c]	Iminoerythrose 4-phosphate	C4H10NO6P	0	C12215
cpd09421[c]	2-(1,2-Dihydroxyethyl)-TPP	C14H21N4O9P2S	-1	C13378
cpd03327[c]	4-Hydroxy-2-ketopimelate	C7H8O6	-2	C05601
cpd00173[c]	NTP	C5H9O13P3R	-3	C00201
cpd00354[c]	NDP	C5H9O10P2R	-2	C00454
cpd02132[c]	3-Phospho-D-erythronate	C4H7O8P	-2	C03356
cpd02645[c]	Phosphoenol-4-deoxy-3-tetrulosonate	C4H5O7P	-2	C04309
cpd00853[c]	DPG	C3H5O10P2	-3	C01159
cpd03077[c]	alpha-Amino acid	C2H3NO2R	-1	C05167
cpd11625[c]	2-Oxo acid	C2O3R	-1	C00161
cpd00706[c]	Mercaptopyruvate	C3H3O3S	-1	C00957
cpd00395[c]	L-Cysteate	C3H6NO5S	-1	C00506
cpd03285[c]	3-Sulfopyruvate	C3H2O6S	-2	C05528
cpd00467[c]	3-Sulfinoalanine	C3H6NO4S	1	C00606
cpd03284[c]	3-Sulfinopyruvate	C3H2O5S	0	C05527
cpd00380[c]	Itaconate	C5H4O4	-2	C00490
cpd00416[c]	Itaconyl-CoA	C26H36N7O19P3S	-4	C00531
cpd03490[c]	UDP-N-acetylmuramoyl-L-alanyl-gamma-D-glutamyl-L-lysine	C34H52N7O24P2	-3	C05892
cpd00919[c]	Homocitrate	C7H7O7	-3	C01251
cpd01700[c]	D-Citramalate	C5H6O5	-2	C02612
cpd01502[c]	Citraconate	C5H4O4	-2	C02226
cpd03561[c]	2-Hydroxybutyrate	C4H7O3	-1	C05984
cpd03455[c]	3-Mercaptolactate	C3H5O3S	-1	C05823
cpd00365[c]	Retinol	C20H30O	0	C00473
cpd00304[c]	Retinal	C20H28O	0	C00376
cpd03227[c]	5beta-Cholestane-3alpha,7alpha,26-triol	C27H48O3	0	C05444
cpd03228[c]	3alpha,7alpha-Dihydroxy-5beta-cholestan-26-al	C27H46O3	0	C05445
cpd03306[c]	3,4-Dihydroxyphenylethyleneglycol	C8H10O4	0	C05576
cpd03307[c]	3,4-Dihydroxymandelaldehyde	C8H8O4	0	C05577
cpd04015[c]	trans-3-Chloro-2-propene-1-ol	C3H5OCl	0	C06611
cpd04017[c]	3-Chloroallyl aldehyde	C3H3OCl	0	C06613
cpd04016[c]	cis-3-Chloro-2-propene-1-ol	C3H5OCl	0	C06612
cpd15064[c]	cis-3-Chloroallyl aldehyde	C3H3OCl	0	C16348
cpd09792[c]	1-Naphthalenemethanol	C11H10O	0	C14089
cpd09793[c]	1-Naphthaldehyde	C11H8O	0	C14090
cpd01859[c]	(2-Naphthyl)methanol	C11H10O	0	C02909
cpd09802[c]	2-Naphthaldehyde	C11H8O	0	C14099
cpd04248[c]	Chloral hydrate	C2H3O2Cl3	0	C06899
cpd04661[c]	Trichloroethanol	C2H3OCl3	0	C07490
cpd04806[c]	Aldophosphamide	C7H15N2O3PCl2	0	C07645
cpd16365[c]	Alcophosphamide	C7H17N2O3PCl2	0	C16551
cpd16395[c]	2-Phenyl-1,3-propanediol monocarbamate	C10H13NO3	0	C16586
cpd16396[c]	3-Carbamoyl-2-phenylpropionaldehyde	C10H11NO3	0	C16587
cpd16401[c]	4-Hydroxy-5-phenyltetrahydro-1,3-oxazin-2-one	C10H11NO3	0	C16595
cpd16402[c]	5-Phenyl-1,3-oxazinane-2,4-dione	C10H9NO3	0	C16596
cpd00447[c]	Betaine aldehyde	C5H12NO	1	C00576
cpd11451[c]	mql7	C21H24O2	0	C00828
cpd12783[c]	Menaquinol	C21H26O2	0	C05819
cpd02698[c]	N-Succinyl-L-2,6-diaminopimelate	C11H16N2O7	-2	C04421
cpd02724[c]	N-Succinyl-L-2-amino-6-oxopimelate	C11H12NO8	-3	C04462
cpd03397[c]	Selenohomocysteine	C4H9NO2Se	0	C05698
cpd02738[c]	5-Methyltetrahydropteroyltri-L-glutamate	C30H35N9O12	-4	C04489
cpd03163[c]	Selenomethionine	C5H11NO2Se	0	C05335
cpd02555[c]	Tetrahydropteroyltri-L-glutamate	C29H33N9O12	-4	C04144
cpd14547[c]	C15811	C4H6N2O2SR2	10000000	C15811
cpd14548[c]	C15812	C4H6N2O2S2R2	10000000	C15812
cpd03396[c]	Selenate	H2O4Se	4	C05697
cpd03388[c]	Adenylylselenate	C10H13N5O10PSe	3	C05686
cpd02627[c]	2-Deoxyribonucleoside triphosphate	C5H9O12P3R	-3	C04283
cpd02379[c]	Ribonucleoside triphosphate	C5H9O13P3R	-3	C03802
cpd07923[c]	2-Deoxy-5-hydroxymethylcytidine-5-diphosphate	C10H15N3O11P2	-2	C11038
cpd07924[c]	2-Deoxy-5-hydroxymethylcytidine-5-triphosphate	C10H15N3O14P3	-3	C11039
cpd00976[c]	dIDP	C10H12N4O10P2	-2	C01344
cpd02832[c]	6-Thioinosine 5-monophosphate	C10H12N4O7PS	-1	C04646
cpd16422[c]	6-Thioxanthine 5-monophosphate	C10H12N4O8PS	-1	C16618
cpd16423[c]	6-Thioguanosine monophosphate	C10H13N5O7PS	-1	C16619
cpd14496[c]	myo-Inositol phosphate	C6H11O9P	10000000	C15585
cpd16421[c]	6-Thioinosine-5-triphosphate	C10H12N4O13P3S	-3	C16617
cpd14613[c]	2-Methyl-6-phytylquinol	C27H46O2	0	C15882
cpd11628[c]	Acyl-[acyl-carrier protein]	C3H4OR2S	0	C00173
cpd00517[c]	1-Acyl-sn-glycerol 3-phosphate	C4H8O7PR	-1	C03849|C00681
cpd11728[c]	trans-2,3-Dehydroacyl-[acyl-carrier protein]	C3H2OR2S	0	C00693
cpd11726[c]	3-Oxoacyl-[acyl-carrier protein]	C3H2O2R2S	0	C00685
cpd14938[c]	3-Oxostearoyl-[acp]	C18H33O2RS	0	C16219
cpd16355[c]	Chlorophyllide b	C35H31N4O6Mg	0	C16541
cpd03149[c]	Chlorophyll b	C55H69N4O6Mg	0	C05307
cpd03656[c]	GA2	C39H69N2O18R	0	C06135
cpd00832[c]	N-Acetyl-D-chondrosamine	C8H15NO6	0	C01132
cpd00947[c]	LacCer	C31H56NO13R	0	C01290
cpd02885[c]	Trihexosylceramide	C37H67NO19	0	C04737
cpd02088[c]	Globoside	C45H80N2O24	0	C03272
cpd02996[c]	GM2	C50H85N3O26R	-1	C04924|C04884
cpd12599[c]	GM3	C42H72N2O21R	-1	C04730
cpd00415[c]	Quinol	C6H6O2	0	C02389|C15603|C00530
cpd04005[c]	Chloroquinol	C6H5O2Cl	0	C06601
cpd04004[c]	2,5-Dichlorohydroquinone	C6H4O2Cl2	0	C06600
cpd02174[c]	Tetrachlorohydroquinone	C6HO2Cl4	-1	C03434
cpd04374[c]	2,3,6-Trichlorohydroquinone	C6H2O2Cl3	-1	C07099
cpd04372[c]	2,6-Dichlorohydroquinone	C6H3O2Cl2	-1	C07097
cpd02746[c]	all trans Decaprenyl diphosphate	C50H82O7P2	-2	C17432|C04509
cpd00426[c]	Homogentisate	C8H7O4	-1	C00544
cpd17565[c]	ditrans,dicis-Pentaprenyl diphosphate	C25H44O7P2	NaN	C17435
cpd17564[c]	ditrans,tricis-Hexaprenyl diphosphate	C30H52O7P2	NaN	C17434
cpd17566[c]	ditrans,tetracis-Heptaprenyl diphosphate	C35H60O7P2	NaN	C17436
cpd17567[c]	ditrans,pentacis-Octaprenyl diphosphate	C40H68O7P2	NaN	C17437
cpd17568[c]	ditrans,hexacis-Nonaprenyl diphosphate	C45H76O7P2	NaN	C17438
cpd02016[c]	N-Ribosylnicotinamide	C11H15N2O5	1	C03150
cpd01197[c]	Nebularine	C10H12N4O4	0	C15586|C01736
cpd00360[c]	Purine	C5H4N4	0	C15587
cpd03566[c]	Acetyl adenylate	C12H15N5O8P	-1	C05993
cpd11427[c]	CDP-diacylglycerol	C14H17N3O15P2R2	-2	C00269
cpd11454[c]	Phosphatidylglycerophosphate	C8H12O13P2R2	-2	C03892
cpd11727[c]	N-Acyl-D-mannosamine 6-phosphate	C7H12NO9PR	-1	C00686
cpd12473[c]	N-Acyl-D-glucosamine 6-phosphate	C7H12NO9PR	-1	C04136
cpd00210[c]	Taurine	C2H7NO3S	0	C00245
cpd00406[c]	Hypotaurine	C2H7NO2S	0	C00519
cpd03593[c]	D-erythro-3-Methylmalate	C5H6O5	-2	C06032
cpd02135[c]	4-Nitrophenyl phosphate	C6H5NO6P	-1	C03360
cpd00646[c]	PNP	C6H5NO3	0	C00870
cpd00424[c]	Cystathionine	C7H14N2O4S	0
cpd00381[c]	L-Cystine	C6H12N2O4S2	0
cpd01347[c]	Thiocysteine	C3H7NO2S2	0	C01962
cpd03398[c]	Selenocystathionine	C7H14N2O4Se	0	C05699
cpd01504[c]	3-Aminopropanal	C3H8NO	1	C05665
cpd11672[pool]	Polyphosphate	H4P2O7(HPO3)n	0	C00404
cpd12854	Silicon	Si	0
KG_C02291[c]	L-Cystathionine	C7H14N2O4S	0	C02291
KG_C06143	Poly-beta-hydroxybutyrate	(C4H6O2)n	0	C06143
cyc6	cyctochrome_6	[]	0
cyc6*(reduced)	cyctochrome_6(reduced)	[]	-1
cyanophycin	cyanophycin	C4H6NO4	0	C19709

## Sheet: Genes
IMG ID	PEG ID
2505125051	unlisted
2505162505	unlisted
2505165612	10
2505165616	14
2505165617	15
2505165630	28
2505165632	30
2505165633	31
2505165635	33
2505165637	35
2505165638	36
2505165639	37
2505165653	51
2505165655	53
2505165663	60
2505165670	67
2505165671	68
2505165679	75
2505165680	76
2505165693	89
2505165694	90
2505165699	95
2505165700	96
2505165701	97
2505165703	99
2505165706	102
2505165716	113
2505165717	unlisted
2505165720	116
2505165725	121
2505165726	122
2505165728	124
2505165734	129
2505165738	133
2505165746	141
2505165749	144
2505165750	145
2505165754	149
2505165761	156
2505165766	161
2505165776	171
2505165781	176
2505165784	179
2505165791	186
2505165817	210
2505165825	217
2505165840	231
2505165851	240
2505165862	250
2505165883	268
2505165886	271
2505165888	273
2505165890	275
2505165895	280
2505165902	286
2505165905	289
2505165916	300
2505165919	303
2505165921	305
2505165931	315
2505165933	317
2505165939	323
2505165941	325
2505165951	335
2505165958	342
2505165968	352
2505165971	355
2505165972	356
2505165974	357
2505165982	365
2505166003	385
2505166005	387
2505166012	392
2505166019	398
2505166020	399
2505166030	408
2505166031	409
2505166036	415
2505166041	unlisted
2505166060	436
2505166070	445
2505166073	448
2505166074	449
2505166075	450
2505166080	454
2505166082	455
2505166083	456
2505166094	467
2505166111	482
2505166130	500
2505166135	505
2505166139	509
2505166141	511
2505166154	524
2505166155	525
2505166162	532
2505166166	536
2505166169	539
2505166170	540
2505166171	541
2505166172	543
2505166185	554
2505166192	561
2505166217	584
2505166218	585
2505166234	601
2505166238	605
2505166242	609
2505166244	611
2505166246	613
2505166269	631
2505166270	632
2505166282	646
2505166295	658
2505166307	670
2505166308	671
2505166310	673
2505166314	677
2505166323	686
2505166324	687
2505166329	692
2505166339	702
2505166347	709
2505166375	unlisted
2505166376	unlisted
2505166378	737
2505166381	740
2505166382	741
2505166383	742
2505166385	746
2505166388	749
2505166392	753
2505166395	756
2505166396	757
2505166397	758
2505166399	760
2505166403	763
2505166404	764
2505166405	765
2505166420	780
2505166431	790
2505166432	791
2505166437	796
2505166444	803
2505166457	813
2505166459	815
2505166476	832
2505166495	848
2505166497	851
2505166498	852
2505166502	855
2505166514	864
2505166516	866
2505166520	870
2505166524	874
2505166530	879
2505166539	888
2505166541	890
2505166546	895
2505166557	906
2505166565	916
2505166602	951
2505166620	967
2505166625	972
2505166631	978
2505166636	983
2505166637	984
2505166638	985
2505166639	986
2505166640	987
2505166647	994
2505166650	997
2505166653	1000
2505166660	1006
2505166661	1007
2505166662	1008
2505166663	1009
2505166664	1010
2505166665	1011
2505166666	1012
2505166670	1015
2505166671	1016
2505166692	1034
2505166693	1035
2505166694	1036
2505166695	1037
2505166704	1044
2505166725	1064
2505166736	1073
2505166739	1076
2505166767	1101
2505166769	1103
2505166784	1118
2505166791	1124
2505166793	1126
2505166800	1134
2505166817	1148
2505166819	1150
2505166825	1156
2505166836	1165
2505166845	1174
2505166851	1180
2505166869	1195
2505166872	1198
2505166876	1202
2505166877	1203
2505166879	1205
2505166880	1206
2505166884	1210
2505166897	1223
2505166899	1225
2505166900	1226
2505166901	1227
2505166902	1228
2505166906	1232
2505166923	1249
2505166949	1269
2505166950	1270
2505166951	1271
2505166952	1272
2505166953	1273
2505166954	1274
2505166955	1275
2505166956	1276
2505166958	1278
2505166960	1280
2505166961	1281
2505166962	1282
2505166963	1283
2505166964	1284
2505166965	1285
2505166966	1286
2505166967	1287
2505166968	1288
2505166969	1289
2505166970	1290
2505166971	1291
2505166972	1292
2505166973	1293
2505166974	1294
2505166975	1295
2505166976	1296
2505166977	1297
2505166982	1302
2505166988	1308
2505166991	1311
2505167005	1322
2505167006	1323
2505167015	1332
2505167016	1333
2505167017	1334
2505167018	1335
2505167019	1336
2505167022	1339
2505167023	1340
2505167050	1367
2505167067	1383
2505167068	1384
2505167070	1386
2505167082	1396
2505167083	1397
2505167096	1409
2505167103	1416
2505167104	1417
2505167107	1419
2505167109	1421
2505167112	1424
2505167115	1427
2505167117	1429
2505167126	1438
2505167133	1445
2505167140	1452
2505167148	1460
2505167158	1470
2505167167	1477
2505167169	1479
2505167172	1482
2505167183	1491
2505167184	1492
2505167190	1498
2505167191	1499
2505167204	1509
2505167209	1513
2505167217	1520
2505167232	1533
2505167234	1535
2505167235	1536
2505167250	1549
2505167253	1552
2505167254	1553
2505167264	1562
2505167266	1564
2505167273	1571
2505167280	1578
2505167281	1579
2505167293	1589
2505167309	1604
2505167321	1614
2505167322	1615
2505167323	1616
2505167324	1617
2505167325	1618
2505167326	1619
2505167327	1620
2505167333	1625
2505167350	1638
2505167361	1649
2505167366	1654
2505167376	1664
2505167382	1670
2505167383	1671
2505167401	1689
2505167410	1698
2505167436	1723
2505167437	1724
2505167444	1732
2505167448	1736
2505167455	1743
2505167459	1747
2505167463	1751
2505167464	1752
2505167467	1755
2505167482	1770
2505167494	1782
2505167495	1783
2505167500	1788
2505167514	1802
2505167515	1803
2505167516	1804
2505167517	1805
2505167522	1809
2505167524	1811
2505167536	1821
2505167538	1823
2505167541	1826
2505167546	1830
2505167555	1838
2505167556	1839
2505167561	1844
2505167576	1860
2505167578	1862
2505167581	1865
2505167582	1866
2505167583	1867
2505167585	1869
2505167587	1871
2505167588	1872
2505167589	1873
2505167598	1882
2505167603	1887
2505167607	1891
2505167639	1922
2505167646	1929
2505167651	1934
2505167653	1936
2505167661	1943
2505167663	1945
2505167675	1956
2505167681	1962
2505167683	1964
2505167690	1971
2505167691	1972
2505167702	1982
2505167705	1985
2505167734	2014
2505167736	2016
2505167741	2021
2505167742	2022
2505167744	2023
2505167745	2024
2505167751	2029
2505167752	2030
2505167754	2032
2505167768	2043
2505167769	2044
2505167771	2046
2505167802	2076
2505167806	2080
2505167810	2084
2505167813	2087
2505167814	2088
2505167825	2099
2505167835	2108
2505167838	2111
2505167839	2112
2505167840	2113
2505167842	2115
2505167847	2120
2505167858	2127
2505167907	2170
2505167910	2173
2505167912	2175
2505167913	2176
2505167921	2183
2505167924	2186
2505167925	2187
2505167938	2199
2505167963	2222
2505167964	2223
2505167965	2224
2505167966	unlisted
2505167990	2241
2505167994	2245
2505168009	2259
2505168018	2268
2505168049	2288
2505168050	2289
2505168061	2299
2505168063	2301
2505168067	2305
2505168118	2347
2505168133	2362
2505168142	2371
2505168149	2378
2505168150	2379
2505168153	2382
2505168169	2397
2505168172	2400
2505168179	unlisted
2505168215	2432
2505168220	2437
2505168232	2442
2505168240	2449
2505168242	2451
2505168245	2454
2505168251	2458
2505168257	2464
2505168260	2467
2505168261	2468
2505168262	2469
2505168264	2471
2505168271	2477
2505168273	2479
2505168274	2480
2505168275	2481
2505168281	2487
2505168283	2489
2505168294	2499
2505168296	2500
2505168303	2507
2505168309	2513
2505168310	2514
2505168322	unlisted
2505168349	2533
2505168366	2548
2505168367	2549
2505168375	2554
2505168376	2555
2505168382	2561
2505168403	2580
2505168407	2584
2505168408	2585
2505168411	2588
2505168415	2592
2505168419	2596
2505168421	2598
2505168423	2600
2505168427	2604
2505168440	2617
2505168452	2627
2505168475	2648
2505168477	2650
2505168479	2652
2505168484	2657
2505168485	2658
2505168489	2662
2505168501	2671
2505168502	2672
2505168507	2676
2505168539	2704
2505168544	2709
2505168549	2714
2505168556	2719
2505168561	2724
2505168562	2725
2505168567	2730
2505168569	2732
2505168577	2740
2505168579	2742
2505168580	2743
2505168581	2744
2505168583	2746
2505168597	2759
2505168599	2761
2505168605	2767
2505168611	2771
2505168617	2776
2505168619	2778
2505168631	2791
2505168646	2806
2505168660	2823
2505168666	2829
2505168679	2841
2505168685	2847
2505168686	2848
2505168688	2850
2505168689	2851
2505168702	2864
2505168712	2874
2505168714	2876
2505168718	2880
2505168722	2884
2505168727	2889
2505168730	2892
2505168734	2896
2505168738	2899
2505168753	2914
2505168756	2917
2505168762	2923
2505168765	2926
2505168767	2928
2505168770	2931
2505168773	2934
2505168775	2936
2505168792	2953
2505168817	2978
2505168827	2987
2505168835	2994
2505168842	3000
2505168844	3002
2505168845	3003
2505168846	3004
2505168849	3007
2505168851	3008
2505168860	3016
2505168871	3026
2505168873	3028
2505168884	3037
2505168886	unlisted
2505168887	unlisted
2505168890	3041
2505168895	3045
2505168898	3048
2505168909	3059
2505168929	3079
2505168934	3084
2505168935	3085
2505168937	3087
2505168955	3103
2505168962	3110
2505168964	3112
2505168967	3115
2505168969	3117
2505168974	3122
2505168986	3134
2505168995	3143
2505169010	3157
2505169013	3159
2505169018	3164
2505169026	3172
2505169036	3181
2505169038	3183
2505169050	3194
2505169061	3205
2505169076	3220
2505169079	3223
2505169085	3229
2505169091	3235
2505169093	3237
2505169095	3239
2505169096	3240
2505169097	3241
2505169105	3249
2505169112	3256
2505169115	3259
2505169116	3260
2505169126	3269
2505169128	3271
2505169133	3275
2505169156	3297
2505169158	3299
2505169161	3301
2505169170	3310
2505169197	3334
2505169219	3355
2505169220	3356
2505169221	3357
2505169225	3361
2505169231	3367
2505169233	3369
2505169238	3374
2505169244	3380
2505169253	3389
2505169257	3393
2505169258	3394
2505169259	3395
2505169263	3399
2505169282	3419
2505169283	3420
2505169287	3424
2505169293	3430
2505169295	3432
2505169298	3435
2505169335	3470
2505169338	3473
2505169340	3475
2505169343	3478
2505169345	3480
2505169346	3481
2505169383	3519
2505169400	3535
2505169404	3539
2505169407	3542
2505169408	3543
2505169414	3548
2505169416	3550
2505169419	unlisted
2505169423	3556
2505169424	3557
2505169430	3563
2505169432	3565
2505169445	3575
2505169446	3576
2505169452	3582
2505169457	3587
2505169458	3588
2505169471	3600
2505169473	3602
2505169479	3608
2505169486	3615
2505169487	3616
2505169488	3617
2505169490	3619
2505169497	3626
2505169499	3629
2505169513	3642
2505169514	3643
2505169515	3644
2505169516	3645
2505169524	3653
2505169538	3665
2505169548	3675
2505169563	3688
2505169566	3691
2505169574	3698
2505169581	3705
2505169592	unlisted
2505169593	3715
2505169603	3724
2505169604	3725
2505169612	3732
2505169624	3742
2505169625	3743
2505169626	3744
2505169627	3745
2505169628	3746
2505169629	3747
2505169630	3748
2505169631	3749
2505169653	3770
2505169659	3776
2505169666	3782
2505169698	3810
2505169705	3817
2505169710	3822
2505169722	3832
2505169723	3833
2505169727	3837
2505169729	3838
2505169733	3842
2505169736	3845
2505169760	3868
2505169769	3877
2505169770	3878
2505169773	3881
2505169777	3885
2505169792	3900
2505169815	3922
2505169831	3938
2505169835	3942
2505169846	3953
2505169847	3954
2505169856	3963
2505169860	3965
2505169876	3979
2505169881	3984
2505169882	3985
2505169894	3997
2505169895	3998
2505169897	4000
2505169911	4013
2505169925	4027
2505169933	4034
2505169942	4043
2505169948	4049
2505169957	4057
2505169964	4063
2505169983	4081
2505169985	4083
2505169986	4084
2505169989	4086
2505169990	4087
2505169991	4088
2505169992	4089
2505169996	4093
2505170006	4102
2505170007	4103
2505170013	4109
2505170014	4110
2505170019	4115
2505170021	4117
2505170026	4122
2505170028	4124
2505170037	4133
2505170041	4137
2505170047	4143
2505170048	4144
2505170049	4145
2505170063	4158
2505170069	4164
2505170071	4166
2505170079	4173
2505170092	4184
2505170095	4187
2505170102	4194
2505170115	4205
2505170116	4206
2505170119	4210
2505170124	4215
2505170135	4225
2505170142	4229
2505170151	4238
2505170171	4255
2505170178	4261
2505170187	4270
2505170194	4277
2505170210	4291
2505170243	4315
2505170252	4324
2505170261	4333
2505170274	4345
2505170278	4350
2505170279	4351
2505170306	4374
2505170337	4378
2505170339	4380
2505170341	4382
2505170364	4400
2505170366	4402
2505170370	4406
2505170374	4410
2505170379	4415
2505170393	4427
2505170408	4440
2505170413	4445
2505170418	4450
2505170421	4453
2505170425	4457
2505170441	4473
2505170446	4477
2505170447	4478
2505170448	4479
2505170453	4483
2505170458	4488
2505170464	4494
2505170478	4507
2505170490	4519
2505170491	4520
2505170498	4527
2505170503	4532
2505170511	4540
2505170513	4542
2505170514	4543
2505170520	4549
2505170536	4565
2505170539	4568
2505170551	4577
2505170552	4578
2505170559	4585
2505170560	4586
2505170576	4602
2505170579	4604
2505170590	4615
2505170603	4628
2505170610	4635
2505170621	4646
2505170636	4659
2505170655	4677
2505170656	4678
2505170657	4679
2505170664	4686
2505170670	4692
2505170706	4725
2505170707	4726
2505170708	4727
2505170709	4728
2505170711	4730
2505170722	4741
2505170742	4761
2505170751	4770
2505170758	4777
2505170762	4781
2505170763	4782
2505170766	4785
2505170774	4792
2505170780	4798
2505170787	4805
2505170797	4815
2505170823	4839
2505170825	4841
2505170827	4842
2505170848	4863
2505170853	4868
2505170875	4889
2505170876	4890
2505170903	4918
2505170904	4919
2505170910	4925
2505170916	4930
2505170922	4935
2505170939	4951
2505170940	4952
2505170943	4955
2505170951	4964
2505170954	4967
2505170955	4968
2505170965	4977
2505170977	4988
2505170978	4989
2505170979	4990
2505170982	4993
2505170986	4999
2505171016	5026
2505171024	5034
2505171033	5043
2505171052	5060
2505171055	5062
2505171060	5067
2505171062	5069
2505171063	5070
2505171067	5074
2505171069	5076
2505171075	5082
2505171077	5084
2505171086	5092
2505171087	5093
2505171096	5101
2505171103	5107
2505171113	5116
2505171114	5117
2505171115	5118
2505171117	5119
2505171118	5120
2505171129	5130
2505171137	5139
2505171150	5152
2505171153	5155
2505171159	5162
2505171160	5163
2505171163	5166
2505171166	5169
2505171167	5170
2505171169	5172
2505171176	5178
2505171179	5181
2505171182	5183
2505171183	5184
2505177802	unlisted

## Sheet: GPR
Reaction	GPR ASSOCIATION (with IMG ID)	Confidence
rxn02320	(2505165616 || 2505167361)	3
rxn12008	2505170393	3
rxn00882	2505166514	3
rxn08977	(2505166670 & 2505166671 & 2505169345 & 2505169346 & 2505166539)	3
rxn01257	2505170978	3
rxn05029	(2505169524 || 2505171103)	3
rxn00541	2505166185	3
rxn00225	2505165972	3
rxn05401	(2505167183 & 2505167184 & 2505167839 & 2505168884 & 2505169263 & 2505169760 & 2505170252)	2
rxn02518	2505167158	3
rxn01265	2505170939	3
rxn10126	undetermined	3
rxn10215	2505168257	3
rxn01740	2505169604	3
rxn03535	(2505169524 || 2505171103)	3
rxn00785	2505170664	3
rxn05092	(2505167814 || 2505168702)	3
rxn08548	(2505177802 || 2505168262)	3
rxn00802	2505168967	3
rxn03638	2505170142	3
rxn08546	(2505177802 || 2505168262)	3
rxn07587	2505168367	2
rxn08127	2505165633	2
rxn05323	2505167254	3
rxn12847	(2505167209 & 2505168734 & 2505169710 & 2505171163)	2
rxn03084	(2505167266 || 2505166012)	3
rxn08083	2505168257	3
rxn10195	2505170364	3
rxn05371	(2505168215 & 2505168261 & 2505168271 & 2505170513 & 2505170514)	2
rxn02507	2505170751	3
rxn00011	(2505167096 & 2505169581) || (2505165728 & 2505170041)	3
rxn00292	2505169882	3
rxn05147	2505166988	2
rxn01675	2505170458	3
rxn03901	2505170071	3
rxn05252	(2505167015 & 2505167016 & 2505167017 & 2505167019 & 2505167022 & 2505167023 & 2505167690 & 2505167691 & 2505166060 & 2505166070 & 2505166073 & 2505170825 & 2505171060)	2
rxn00083	(2505169126 & 2505169128)	3
rxn04161	2505170014	3
rxn00016	2505166991	3
rxn05347	(2505168261 || 2505168271)	3
rxn05398	2505168580	2
rxn12636	(2505167209 & 2505168734 & 2505169710 & 2505171163)	2
rxn05466	(2505169985 & 2505169989)	2
rxn08707	2505170393	2
rxn00927	2505166988	3
rxn00416	(2505166041 || 2505168423)	3
rxn05338	(2505167183 & 2505167184 & 2505167839 & 2505168884 & 2505169263 & 2505169760 & 2505170252)	2
rxn03933	2505167482	3
rxn12644	(2505167209 & 2505168734 & 2505169710 & 2505171163)	2
rxn05173	2505166988	2
rxn00669	2505169446	2
rxn09112	2505168955	3
rxn05536	(2505166739 & 2505167382 & 2505167383 & 2505167921 & 2505167925 & 2505168767 & 2505169486 & 2505171182 & 2505166388)	2
rxn05155	2505168827	2
rxn04153	2505169010	3
rxn01111	(2505171016 || 2505171016)	3
rxn01513	2505165701	3
rxn05537	(2505166739 & 2505167382 & 2505167383 & 2505167921 & 2505167925 & 2505168767 & 2505169486 & 2505171182 & 2505166388)	2
rxn10209	(2505167802 || 2505168262)	3
rxn00903	2505166246	3
rxn02476	2505170576	3
rxn06729	2505168581	3
rxn00947	(2505167015 & 2505167016 & 2505167017 & 2505167019 & 2505167022 & 2505167023 & 2505167690 & 2505167691 & 2505166060 & 2505166070 & 2505166073 & 2505170825 & 2505171060)	2
rxn01333	(2505170982 || 2505169096)	3
rxn03394	(2505167109 & 2505167401 & 2505165933 & 2505170063 & 2505166141)	2
rxn01870	(2505166282 || 2505169777)	3
rxn05333	2505168580	2
rxn01387	2505168569	3
rxn04954	2505166020	3
rxn01575	2505166246	3
rxn01506	2505166602	3
rxn05400	(2505168215 & 2505168261 & 2505168271 & 2505170513 & 2505170514)	2
rxn08088	2505168257	3
rxn10343	(2505167083 & 2505167683 & 2505165703)	2
rxn05168	(2505167910 & 2505167912 & 2505167913 & 2505168475 & 2505168477 & 2505168479 & 2505168484 & 2505168485 & 2505170278 & 2505170279)	2
rxn02342	(2505167096 || 2505169581)	3
rxn10310	2505168408	2
rxn00781	(2505167745 || 2505170366)	3
rxn01133	2505165895	2
rxn05442	2505167254	2
rxn00973	2505168762	3
rxn00838	2505167768	3
rxn02986	2505166876	3
rxn04705	2505170478	2
rxn00297	2505169882	3
rxn00065	(2505165720 & 2505165734 & 2505167436 & 2505167576 & 2505167585 & 2505167598 & 2505167607 & 25051250516631403 & 25051250516631404 & 2505167842 & 2505167924 & 2505168063 & 2505168169 & 2505168251 & 2505165886 & 2505168605 & 2505168611 & 2505165630 & 2505168770 & 250516594105165734 & 2505165941 & 2505169404 & 2505169513 & 2505169514 & 2505165982 & 2505169538 & 2505169733 & 2505170095 & 425051656301…	2
rxn05544	(2505166739 & 2505167382 & 2505167383 & 2505167921 & 2505167925 & 2505168767 & 2505169486 & 2505171182 & 2505166388)	2
rxn00141	2505168567	2
rxn08291	2505169773	2
rxn05651	(2505170903 & 2505170904)	2
rxn05330	2505168580	2
rxn03910	2505166385	2
rxn03492	2505170124	2
rxn00364	2505168281	2
rxn00775	(2505167463 & 2505168964 & 2505170876)	2
rxn00303	2505167232	2
rxn05616	(2505167538 & 2505166339)	2
rxn00816	(2505167070 & 2505171033)	2
rxn02716	2505167333	2
rxn00515	2505170026	3
rxn01025	(2505169091 & 2505170916)	2
rxn05425	(2505168215 & 2505168261 & 2505168271 & 2505170513 & 2505170514)	2
rxn01434	2505168303	3
rxn00695	2505167366	3
rxn01134	(2505167050 & 2505167675)	2
rxn00693	2505170425	3
rxn02011	2505168544	2
rxn00702	(2505167751 & 2505169038)	2
rxn02186	2505169860	2
rxn00122	2505169026	3
rxn10202	(2505167802 || 2505168262)	3
rxn08527	((2505168142) || (2505166800 & 2505168142))	2
rxn12848	(2505166739 & 2505167382 & 2505167383 & 2505167921 & 2505167925 & 2505168767 & 2505169486 & 2505171182 & 2505166388)	2
rxn00369	2505171016	2
rxn01116	2505170722	3
rxn00337	2505166620	3
rxn02212	2505168245	3
rxn03908	2505170421	2
rxn03419	2505170047	2
rxn05408	2505168260	2
rxn05436	2505167254	2
rxn00917	2505168366	3
rxn09113	2505168955	3
rxn02160	2505169244	2
rxn08551	(2505167802 || 2505168262)	3
rxn10125	(2505169126 & 2505169128)	2
rxn08308	2505165637	2
rxn02733	(2505165776 & 2505168860 & 2505169079 & 2505170116)	2
rxn02945	2505171052	2
rxn00777	2505165655	3
rxn00409	2505170026	3
rxn05602	2505169400	2
rxn03536	2505166139	3
rxn01512	2505170026	3
rxn00883	2505166514	3
rxn12846	(2505167209 & 2505168734 & 2505169710 & 2505171163)	2
rxn00248	2505168756	3
rxn05161	(2505167910 & 2505167912 & 2505167913 & 2505168475 & 2505168477 & 2505168479 & 2505168484 & 2505168485 & 2505170278 & 2505170279)	2
rxn05239	2505168049	3
rxn05734	(2505167234 & 2505169105)	2
rxn08547	(2505167802 || 2505168262)	3
rxn01302	2505171063	3
rxn03406	(2505167133 || 2505169287)	3
rxn01466	2505167126	2
rxn02185	(2505170041 || 2505165728)	3
rxn00500	2505170579	3
rxn05422	(2505167183 & 2505167184 & 2505167839 & 2505168884 & 2505169263 & 2505169760 & 2505170252)	2
rxn05358	2505168260	2
rxn05448	2505167254	2
rxn00048	2505166155	3
rxn07584	2505167583	2
rxn01106	(2505170019 || 2505169225 || 2505165971 || 2505168909)	3
rxn03164	2505168660	3
rxn02213	2505168411	3
rxn08976	(2505168427 & 2505165939)	2
rxn00342	(2505170135 || 2505171163)	3
rxn08669	(2505166879 & 2505165617)	2
rxn00784	2505167459	2
rxn04154	2505169010	3
rxn02200	2505168242	2
rxn00361	2505170536	2
rxn00082	2505167280	2
rxn02804	2505167190	2
rxn02789	(2505166495 & 2505167112)	3
rxn05383	2505168260	2
rxn01258	2505167326	3
rxn00293	2505170142	3
rxn00830	(2505170848 & 2505166242)	2
rxn05542	(2505166739 & 2505167382 & 2505167383 & 2505167921 & 2505167925 & 2505168767 & 2505169486 & 2505171182 & 2505166388)	2
rxn08180	2505169516	2
rxn05229	(2505167104 & 2505169990)	2
rxn01331	2505170636	2
rxn05397	(2505167183 & 2505167184 & 2505167839 & 2505168884 & 2505169263 & 2505169760 & 2505170252)	2
rxn12637	(2505167209 & 2505168734 & 2505169710 & 2505171163)	2
rxn03538	2505165905	3
rxn05740	2505170853	2
rxn04308	2505169233	2
rxn10042	(2505169407 & 2505169408 & 2505169624 & 2505169625 & 2505169626 & 2505169628 & 2505169629 & 2505169630 & 2505169631)	2
rxn00800	2505169574	3
rxn07586	(2505169705 & 2505170115)	2
rxn01343	2505167140	3
rxn01537	2505166420	3
rxn01520	2505166982	3
rxn05415	2505168580	2
rxn10194	2505170364	3
rxn03062	2505169457	3
rxn00189	(2505167437 || 2505166041 || 2505168423 || (2505168986 & 2505166825))	3
rxn08783	2505170579	2
rxn00322	2505165639	2
rxn05441	2505167254	2
rxn00463	2505167158	3
rxn05054	2505170922	3
rxn05426	(2505167183 & 2505167184 & 2505167839 & 2505168884 & 2505169263 & 2505169760 & 2505170252)	2
rxn00974	2505168762	3
rxn08297	2505171086	2
rxn00506	(2505167234 || 2505169105)	3
rxn04384	2505170922	3
rxn01388	2505168762	3
rxn00902	(2505167522 || 2505165612)	3
rxn05421	(2505168215 & 2505168261 & 2505168271 & 2505170513 & 2505170514)	2
rxn00503	2505168835	3
rxn03909	2505166295	3
rxn02985	2505170048	2
rxn00119	2505170706	3
rxn01791	2505168281	3
rxn10214	2505168257	3
rxn04070	2505167455	2
rxn05328	2505167254	3
rxn09685	2505167813	2
rxn03446	(2505165746 || 2505166218)	3
rxn05332	2505168580	2
rxn02314	2505167140	3
rxn01519	2505167158	3
rxn00179	2505170028	3
rxn02853	2505169105	3
rxn00999	2505166906	2
rxn03004	2505168722	2
rxn00029	2505168452	2
rxn01324	2505170048	2
rxn01465	(2505168118 & 2505170021)	2
rxn05364	(2505167183 & 2505167184 & 2505167839 & 2505168884 & 2505169263 & 2505169760 & 2505170252)	2
rxn05372	(2505167183 & 2505167184 & 2505167839 & 2505168884 & 2505169263 & 2505169760 & 2505170252)	2
rxn00863	2505171166	3
rxn01299	2505166988	3
rxn11544	(2505169093 & 2505166036)	2
rxn00242	(2505167232 & 2505167840)	2
rxn01975	2505169095	3
rxn02925	2505167771	2
rxn00459	2505166395	3
rxn00405	2505170490	3
rxn02277	2505166650	2
rxn03150	2505165971	2
rxn09687	2505167813	2
rxn04413	2505166139	3
rxn10225	2505165637	2
rxn10259	2505168955	3
rxn03491	(2505167169 & 2505165638 & 2505166378)	2
rxn05031	2505171052	2
rxn00018	(2505170762 & 2505165766)	3
rxn10217	2505168257	3
rxn09449	(2505167015 & 2505167016 & 2505167017 & 2505167019 & 2505167022 & 2505167023 & 2505167690 & 2505167691 & 2505166060 & 2505166070 & 2505166073 & 2505170825 & 2505171060)	2
rxn05735	(2505167234 & 2505169105)	2
rxn00691	2505166217	2
rxn00929	2505167806	3
rxn12638	(2505167209 & 2505168734 & 2505169710 & 2505171163)	2
rxn05316	2505167813	2
rxn05329	2505168580	2
rxn00533	2505169603	2
rxn08311	2505165637	2
rxn10168	(2505169894 & 2505169895 & 2505169897)	2
rxn05419	2505168580	2
rxn10263	2505168955	3
rxn00423	(2505167273 & 2505168617 & 2505168619 & 2505168842)	2
rxn08756	2505169983	2
rxn03975	2505166625	2
rxn03436	2505169860	3
rxn12643	(2505167209 & 2505168734 & 2505169710 & 2505171163)	2
rxn05430	(2505167183 & 2505167184 & 2505167839 & 2505168884 & 2505169263 & 2505169760 & 2505170252)	2
rxn01964	(2505170965 & 2505167561)	3
rxn08615	(2505168172 & 2505169158)	2
rxn10207	(2505167802 || 2505168262)	3
rxn10113	(2505168273 & 2505169295 & 2505169722 & 2505169723)	2
rxn01101	2505167835	3
rxn00559	2505169424	2
rxn00615	2505166704	2
rxn03919	2505166329	2
rxn03248	2505167190	2
rxn08307	2505165637	2
rxn00302	2505170047	2
rxn00358	(2505167067 & 2505167068)	2
rxn02264	2505168556	2
rxn03903	2505169831	3
rxn10043	(2505169257 & 2505169258 & 2505169259)	2
rxn03537	2505166139	3
rxn05315	2505166135	2
rxn00985	2505165972	3
rxn05427	2505168580	2
rxn05341	(2505167183 & 2505167184 & 2505167839 & 2505168884 & 2505169263 & 2505169760 & 2505170252)	2
rxn05145	(2505166899 & 2505166900 & 2505166901 & 2505166902 & 2505166636 & 2505166637 & 2505166638 & 2505166639)	2
rxn12510	2505168962	2
rxn02201	2505168242	2
rxn10123	(2505166670 & 2505166671 & 2505169345 & 2505169346 & 2505166539)	2
rxn11545	2505167963	2
rxn05447	2505167254	2
rxn02988	2505168153	3
rxn05392	(2505168215 & 2505168261 & 2505168271 & 2505170513 & 2505170514)	2
rxn05176	(2505168844 & 2505170446 & 2505166397)	2
rxn00161	2505166769	2
rxn02046	(2505166541 || 2505167639 || 2505167603 || 2505169736 || 2505168969 || 2505167281 || 2505168773 || 2505165951)	3
rxn05460	(2505168215 & 2505168261 & 2505168271 & 2505170513 & 2505170514)	2
rxn00808	2505170418	2
rxn08352	2505169983	2
rxn10199	(2505166662 & 2505169221 & 2505170013)	2
rxn05209	(2505169283 & 2505169856)	2
rxn05402	2505168580	2
rxn02380	2505167736	3
rxn08306	2505165637	2
rxn00474	(2505170965 & 2505167561)	3
rxn00709	2505171016	2
rxn05535	(2505166739 & 2505167382 & 2505167383 & 2505167921 & 2505167925 & 2505168767 & 2505169486 & 2505171182 & 2505166388)	2
rxn02159	2505171166	3
rxn05360	(2505167183 & 2505167184 & 2505167839 & 2505168884 & 2505169263 & 2505169760 & 2505170252)	2
rxn00148	2505167661	3
rxn00214	(2505167752 & 2505165921)	2
rxn00874	((2505167190) || (2505167190))	2
rxn02937	2505168283	2
rxn09114	2505168955	3
rxn00056	(2505168489 & 2505170797)	2
rxn00640	(2505168765 & 2505170069)	2
rxn06600	(2505168935 & 2505168937)	2
rxn05507	2505169076	2
rxn00727	(2505171067 || 2505171087)	3
rxn03891	2505168631	3
rxn03435	2505169860	3
rxn00649	(2505166880 & 2505168817 & 2505169253)	2
rxn10806	(2505168273 & 2505169722 & 2505169723)	2
rxn05413	(2505168215 & 2505168261 & 2505168271 & 2505170513 & 2505170514)	2
rxn04385	2505166836	2
rxn05348	(2505168215 || 2505168261 || 2505168271 || 2505170513 || 2505170514)	3
rxn01673	2505170026	3
rxn00085	(2505168845 & 2505169423)	3
rxn12845	(2505167209 & 2505168734 & 2505169710 & 2505171163)	2
rxn12851	(2505166739 & 2505167382 & 2505167383 & 2505167921 & 2505167925 & 2505168767 & 2505169486 & 2505171182 & 2505166388)	2
rxn11702	2505167327	2
rxn05438	2505167254	2
rxn05340	(2505167183 & 2505167184 & 2505167839 & 2505168884 & 2505169263 & 2505169760 & 2505170252)	2
rxn08085	2505168257	3
rxn01300	2505169061	3
rxn05153	(2505168844 & 2505169050 & 2505170446 & 2505170447 & 2505170448 & 2505166397)	2
rxn00175	2505169446	3
rxn09109	2505168955	3
rxn00832	2505168873	2
rxn00251	2505170379	3
rxn00295	(2505167752 & 2505165921)	2
rxn10258	2505171086	2
rxn05346	(2505168215 || 2505168261 || 2505168271 || 2505170513 || 2505170514)	3
rxn10208	(2505167802 || 2505168262)	3
rxn10264	2505168955	3
rxn05445	2505167254	2
rxn05289	2505171183	2
rxn00022	2505169293	2
rxn02000	(2505167754 & 2505170560)	2
rxn00558	2505167736	3
rxn00715	2505171016	2
rxn01406	2505168849	2
rxn01977	2505167736	3
rxn05317	2505167813	2
rxn05335	2505168580	2
rxn06979	(2505169093 & 2505166036)	2
rxn10122	(2505166670 & 2505166671 & 2505169345 & 2505169346 & 2505166539)	2
rxn12642	(2505167209 & 2505168734 & 2505169710 & 2505171163)	2
rxn02187	2505169860	3
rxn00368	2505171016	2
rxn09448	(2505167015 & 2505167016 & 2505167017 & 2505167019 & 2505167022 & 2505167023 & 2505167690 & 2505167691 & 2505166060 & 2505166070 & 2505166073 & 2505170825 & 2505171060)	2
rxn00187	(2505167133 || 2505169287)	3
rxn05198	2505167813	2
rxn02875	2505170119	2
rxn01219	2505168281	2
rxn01851	2505169105	3
rxn03421	2505170047	2
rxn00881	2505166514	3
rxn05247	(2505167015 & 2505167016 & 2505167017 & 2505167019 & 2505167022 & 2505167023 & 2505167690 & 2505167691 & 2505166060 & 2505166070 & 2505166073 & 2505170825 & 2505171060)	2
rxn00737	(2505166192 || 2505167467)	3
rxn00986	2505169446	3
rxn03514	2505168718	2
rxn03540	2505167825	2
rxn01200	2505170664	3
rxn07588	(2505167169 & 2505166378)	2
rxn01270	2505171077	2
rxn03841	2505170979	2
rxn00193	2505167410	2
rxn12635	(2505167209 & 2505168734 & 2505169710 & 2505171163)	2
rxn09688	2505167813	2
rxn04160	(2505165974 & 2505166003 & 2505166005)	2
rxn05369	2505168580	2
rxn07441	2505166565	3
rxn01834	2505167681	2
rxn02504	2505169343	3
rxn05543	(2505166739 & 2505167382 & 2505167383 & 2505167921 & 2505167925 & 2505168767 & 2505169486 & 2505171182 & 2505166388)	2
rxn10473	(2505167448 & 2505169238 & 2505166431)	2
rxn01103	2505167589	2
rxn01345	(2505170007 || 2505169097)	3
rxn01127	(2505165862 || 2505166958)	3
rxn05223	2505166640	2
rxn05409	(2505168215 & 2505168261 & 2505168271 & 2505170513 & 2505170514)	2
rxn01073	(2505166879 & 2505165617)	2
rxn08975	(2505168427 & 2505165939)	2
rxn01226	2505166988	3
rxn10314	2505168408	2
rxn00904	2505165888	3
rxn05534	(2505166739 & 2505167382 & 2505167383 & 2505167921 & 2505167925 & 2505168767 & 2505169486 & 2505171182 & 2505166388)	2
rxn05175	(2505167514 & 2505167515 & 2505167516 & 2505167517 & 2505166169 & 2505166170 & 2505166171 & 2505166172)	2
rxn03918	(2505168730 & 2505170151)	2
rxn08294	2505171086	2
rxn00493	(2505169488 || 2505171077 || 2505170441 || 2505165616 || 2505167361)	3
rxn08528	((2505168142) || (2505166800 & 2505168142))	2
rxn01351	2505167158	3
rxn01509	2505169197	3
rxn08309	2505165637	2
rxn05381	2505168580	2
rxn00912	2505165761	2
rxn05446	2505167254	2
rxn01437	2505169036	2
rxn00604	2505169095	3
rxn05386	2505168580	2
rxn05414	(2505167183 & 2505167184 & 2505167839 & 2505168884 & 2505169263 & 2505169760 & 2505170252)	2
rxn03892	2505167126	2
rxn05390	2505168580	2
rxn00789	(2505165694 & 2505166516)	3
rxn05435	2505167254	2
rxn05461	(2505167183 & 2505167184 & 2505167839 & 2505168884 & 2505169263 & 2505169760 & 2505170252)	2
rxn00641	(2505170491 & 2505166270)	2
rxn12844	(2505167209 & 2505168734 & 2505169710 & 2505171163)	2
rxn00692	2505168407	3
rxn00508	2505170539	3
rxn01678	2505170026	3
rxn08312	2505165637	2
rxn10481	(2505167083 & 2505167683 & 2505165703)	2
rxn09108	2505168955	3
rxn01332	(2505166457 || 2505170171)	3
rxn03068	2505169860	3
rxn06077	(2505170511 & 2505165699)	2
rxn11703	2505167324	2
rxn01858	2505167769	2
rxn12849	(2505166739 & 2505167382 & 2505167383 & 2505167921 & 2505167925 & 2505168767 & 2505169486 & 2505171182 & 2505166388)	2
rxn00772	2505170758	2
rxn01545	2505166988	3
rxn00410	2505166817	2
rxn08299	2505171086	2
rxn08657	(250512505165671871 & 2505165670 & 2505165671)	2
rxn02895	2505167103	2
rxn10216	2505168257	3
rxn05361	2505168580	2
rxn00002	2505169432	2
rxn02792	2505170787	2
rxn01115	2505169298	3
rxn05256	2505168049	2
rxn02312	2505169515	2
rxn08971	(2505168427 & 2505165939)	2
rxn10060	(2505170274 & 2505170341)	2
rxn05405	(2505167183 & 2505167184 & 2505167839 & 2505168884 & 2505169263 & 2505169760 & 2505170252)	2
rxn00438	2505168895	2
rxn01109	2505166432	2
rxn05368	(2505167183 & 2505167184 & 2505167839 & 2505168884 & 2505169263 & 2505169760 & 2505170252)	2
rxn03951	2505170339	2
rxn00568	2505167495 & 2505167494)	3
rxn05456	2505168260	2
rxn12634	(2505167209 & 2505168734 & 2505169710 & 2505171163)	2
rxn10261	2505168955	3
rxn06377	2505168934	2
rxn05149	(2505167653 & 2505170178)	2
rxn00300	2505171096	3
rxn00206	(250250516565367278 & 2505165653)	2
rxn00400	2505167280	2
rxn01962	2505167158	3
rxn02288	2505168738	2
rxn00907	((2505167115 & 2505167117) || (2505167115 & 2505167117))	2
rxn02959	2505169992	2
rxn05619	(2505170092 & 2505170708 & 2505170709)	2
rxn05327	2505167254	3
rxn00762	2505169948	2
rxn05423	2505168580	2
rxn05410	(2505167183 & 2505167184 & 2505167839 & 2505168884 & 2505169263 & 2505169760 & 2505170252)	2
rxn05902	2505170520	2
rxn00509	2505170539	3
rxn04048	2505168718	2
rxn10344	(2505167083 & 2505167683 & 2505165703)	2
rxn12224	2505166784	2
rxn07295	(2505167524 & 2505167546)	2
rxn00782	(2505167745 || 2505170636)	3
rxn00205	2505170194	2
rxn06673	(2505170049 & 2505166310)	2
rxn00278	2505166476	3
rxn00790	2505167264	3
rxn05106	2505165679	2
rxn01169	(2505166819 || 2505170243)	3
rxn00365	2505171016	2
rxn05318	2505167813	2
rxn00100	2505168549	2
rxn08296	2505171086	2
rxn10256	2505171086	2
rxn10474	2505167538	2
rxn05404	(2505168215 & 2505168261 & 2505168271 & 2505170513 & 2505170514)	2
rxn01018	2505169815	3
rxn00060	2505169161	2
rxn00806	2505166246	3
rxn01000	2505170603	3
rxn00006	(2505168061 & 2505168375)	2
rxn05462	2505168580	2
rxn00675	2505169446	3
rxn02834	2505167005	3
rxn00656	2505167771	2
rxn10121	(2505167495 & 2505171113)	2
rxn08550	(2505167802 || 2505168262)	3
rxn05334	2505168580	2
rxn05394	2505168580	2
rxn02305	2505166692	2
rxn02341	2505169383	2
rxn04050	2505170124	2
rxn06022	2505169445	2
rxn09310	(2505166693 & 2505167524 & 2505167546 & 2505168898 & 2505169666 & 2505170774 & 2505166520)	2
rxn03175	2505169282	3
rxn01275	2505166497	2
rxn01643	2505165750	3
rxn10257	2505171086	2
rxn02473	2505167253	3
rxn03384	2505168738	2
rxn08128	2505165633	2
rxn05293	2505165706	2
rxn00834	2505169729	3
rxn12639	(2505167209 & 2505168734 & 2505169710 & 2505171163)	2
rxn08978	(2505166670 & 2505166671 & 2505169345 & 2505169346 & 2505166539)	3
rxn10219	2505168257	3
rxn00786	(2505168050 & 2505169777 & 2505166282)	2
rxn05533	(2505166739 & 2505167382 & 2505167383 & 2505167921 & 2505167925 & 2505168767 & 2505169486 & 2505171182 & 2505166388)	2
rxn03080	2505166155	3
rxn05150	(2505167651 & 2505170827)	2
rxn01653	2505168403	2
rxn05199	2505167813	2
rxn02297	2505167444	2
rxn08656	(250512505165671871 & 2505165670 & 2505165671)	2
rxn01362	(2505166869 & 2505169458)	2
rxn10211	2505168257	3
rxn05063	2505170187	2
rxn00227	2505167589	2
rxn01637	2505170763	3
rxn05040	2505171096	3
rxn02929	2505165781	3
rxn00379	2505165890	3
rxn12641	(2505167209 & 2505168734 & 2505169710 & 2505171163)	2
rxn10315	2505168408	2
rxn05450	2505167254	2
rxn06493	(2505168934 & 2505168935 & 2505170742)	2
rxn00350	2505170787	2
rxn10205	(2505167802 || 2505168262)	3
rxn02402	2505166736	2
rxn00239	2505169197	3
rxn00612	2505167464	2
rxn05326	2505167254	3
rxn03243	2505167190	2
rxn05418	(2505167183 & 2505167184 & 2505167839 & 2505168884 & 2505169263 & 2505169760 & 2505170252)	2
rxn09562	2505169197	3
rxn03974	2505166625	2
rxn00711	2505170910	2
rxn05375	(2505168215 & 2505168261 & 2505168271 & 2505170513 & 2505170514)	2
rxn00689	2505166845	2
rxn10309	2505168408	2
rxn10224	2505165637	2
rxn04113	2505169983	2
rxn12633	(2505167209 & 2505168734 & 2505169710 & 2505171163)	2
rxn05250	(2505167015 & 2505167016 & 2505167017 & 2505167019 & 2505167022 & 2505167023 & 2505167690 & 2505167691 & 2505166060 & 2505166070 & 2505166073 & 2505170825 & 2505171060)	2
rxn00351	2505170408	2
rxn00799	2505169957	3
rxn00313	(2505169231 || 2505168421)	3
rxn02791	2505170787	2
rxn06023	2505167810	2
rxn10206	(2505167802 || 2505168262)	3
rxn12640	(2505167209 & 2505168734 & 2505169710 & 2505171163)	2
rxn05024	2505166444	2
rxn02811	(2505166495 & 2505167112)	3
rxn05342	(2505167183 & 2505167184 & 2505167839 & 2505168884 & 2505169263 & 2505169760 & 2505170252)	2
rxn05376	(2505167183 & 2505167184 & 2505167839 & 2505168884 & 2505169263 & 2505169760 & 2505170252)	2
rxn05455	2505168260	2
rxn00333	2505168871	2
rxn10262	2505168955	3
rxn00086	2505167350	2
rxn04673	2505170393	3
rxn01286	2505169105	3
rxn06510	2505167190	2
rxn00199	2505168569	3
rxn01187	(2505165738 || 2505165968)	3
rxn05596	(2505167907 & 2505168561 & 2505168562)	2
rxn01489	2505171052	2
rxn01019	2505167734	3
rxn00412	2505166817	2
rxn11268	(2505168009 & 2505166074)	2
rxn05457	(2505168419 || 2505169563)	3
rxn03174	2505170047	2
rxn00146	2505170579	2
rxn10094	2505165840	2
rxn08310	2505165637	2
rxn05344	(2505168215 || 2505168261 || 2505168271 || 2505170513 || 2505170514)	3
rxn00676	2505167190	2
rxn03135	(2505168714 & 2505166399)	3
rxn05733	(2505166880 & 2505168817)	2
rxn12512	2505169383	2
rxn05350	(2505168215 || 2505168261 || 2505168271 || 2505170513 || 2505170514)	3
rxn00763	(2505167500 & 2505169497)	2
rxn09272	(2505168142 & 2505166800)	3
rxn00138	2505170943	2
rxn10174	(2505166988 & 2505168685 & 2505168686 & 2505168688 & 2505168689)	2
rxn05393	(2505167183 & 2505167184 & 2505167839 & 2505168884 & 2505169263 & 2505169760 & 2505170252)	2
rxn00686	(2505170306 & 2505171137)	2
rxn00301	2505167158	3
rxn00262	2505166405	3
rxn10255	2505171086	2
rxn00791	2505171087	3
rxn00704	2505169996	2
rxn00183	2505168835	3
rxn00338	2505166405	3
rxn08040	2505168408	2
rxn05248	(2505167015 & 2505167016 & 2505167017 & 2505167019 & 2505167022 & 2505167023 & 2505167690 & 2505167691 & 2505166060 & 2505166070 & 2505166073 & 2505170825 & 2505171060)	2
rxn02831	2505167322	2
rxn04159	2505170478	2
rxn01459	2505169105	3
rxn10223	2505165637	2
rxn02569	2505166647	2
rxn00710	(2505169219 & 2505169458)	2
rxn03397	2505165840	2
rxn08084	2505168257	3
rxn03136	2505169574	3
rxn10120	2505171113	2
rxn05539	(2505166739 & 2505167382 & 2505167383 & 2505167921 & 2505167925 & 2505168767 & 2505169486 & 2505171182 & 2505166388)	2
rxn01636	2505168419	3
rxn05893	2505167963	3
rxn01137	2505167769	2
rxn05437	2505167254	2
rxn05170	(2505166988 & 2505168685 & 2505168686 & 2505168688 & 2505168689)	2
rxn10210	(2505167802 || 2505168262)	3
rxn02303	(2505168067 & 2505169925)	2
rxn12850	(2505166739 & 2505167382 & 2505167383 & 2505167921 & 2505167925 & 2505168767 & 2505169486 & 2505171182 & 2505166388)	2
rxn00256	2505168309	3
rxn00216	(2505166819 & 2505170243)	2
rxn02503	2505170875	2
rxn08194	(2505169524 || 2505171103)	3
rxn05411	2505168580	2
rxn10124	(2505166670 & 2505166671 & 2505169345 & 2505169346 & 2505166539)	2
rxn00194	2505167018	3
rxn05440	2505167254	2
rxn03843	2505170393	3
rxn02775	2505167965	2
rxn05349	(2505168215 & 2505168261 & 2505168271 & 2505170513 & 2505170514)	2
rxn10260	2505168955	3
rxn06672	(2505166791 & 2505168890 & 2505170337)	2
rxn07589	(2505167169 & 2505165638 & 2505166378)	2
rxn08333	2505167325	2
rxn04996	2505169983	2
rxn01329	(2505169933 & 2505169996 & 2505166270)	2
rxn00285	(2505166031 & 2505166030)	3
rxn00547	2505166498	3
rxn04047	(2505169705 & 2505170115)	2
rxn00717	(2505169091 & 2505170916)	2
rxn02835	2505167005	3
rxn02373	(2505167847 || 2505169340)	3
rxn01353	2505170026	3
rxn08655	(250512505165671871 & 2505165670 & 2505165671)	2
rxn00726	(2505171067 || 2505171087)	3
rxn05506	2505169076	2
rxn01484	2505169991	2
rxn05287	2505170393	3
rxn10307	2505168408	2
rxn00077	(2505170274 & 2505170341)	2
rxn00545	2505167140	3
rxn05345	(2505168215 || 2505168261 || 2505168271 || 2505170513 || 2505170514)	3
rxn05379	(2505168215 & 2505168261 & 2505168271 & 2505170513 & 2505170514)	2
rxn01334	(2505166282 || 2505169777)	3
rxn09450	(2505167015 & 2505167016 & 2505167017 & 2505167019 & 2505167022 & 2505167023 & 2505167690 & 2505167691 & 2505166060 & 2505166070 & 2505166073 & 2505170825 & 2505171060)	2
rxn00514	2505167158	3
rxn10218	2505168257	3
rxn10308	2505168408	2
rxn05249	(2505167015 & 2505167016 & 2505167017 & 2505167019 & 2505167022 & 2505167023 & 2505167690 & 2505167691 & 2505166060 & 2505166070 & 2505166073 & 2505170825 & 2505171060)	2
rxn02897	2505166923	2
rxn01213	2505167126	3
rxn03147	2505168577	2
rxn10196	2505170364	3
rxn05384	(2505168215 & 2505168261 & 2505168271 & 2505170513 & 2505170514)	2
rxn01917	(2505168974 & 2505170503)	2
rxn08087	2505168257	3
rxn01100	2505166234	3
rxn03884	2505167217	3
rxn01211	((2505167115 & 2505167117) || (2505167115 & 2505167117))	2
rxn01602	(2505170306 & 2505171137)	2
rxn03409	(2505167133 || 2505169287)	3
rxn00525	2505170102	2
rxn02782	2505169566	2
rxn00371	2505167204	2
rxn04152	2505169010	3
rxn09997	2505166872	2
rxn03916	(2505168730 & 2505170151)	2
rxn05389	(2505167183 & 2505167184 & 2505167839 & 2505168884 & 2505169263 & 2505169760 & 2505170252)	2
rxn03146	2505168579	2
rxn00184	2505169473	3
rxn11946	(2505168133 & 2505169612 & 2505166094)	2
rxn05200	2505167813	2
rxn04674	(2505168367 || 2505165840)	3
rxn05444	2505167254	2
rxn00770	2505166653	2
rxn01301	2505171063	3
rxn05163	(2505167514 & 2505167515 & 2505167516 & 2505167517 & 2505166169 & 2505166170 & 2505166171 & 2505166172)	2
rxn05431	2505168580	2
rxn00192	(2505168419 || 2505169563)	3
rxn01603	2505166845	2
rxn05396	(2505168215 & 2505168261 & 2505168271 & 2505170513 & 2505170514)	2
rxn01241	((2505170742) || (2505170742))	2
rxn04046	2505167965	2
rxn00650	(2505167209 & 2505168734 & 2505169710 & 2505171163)	2
rxn13782	(2505166694 & 2505166695 & 2505166767 & 2505166949 & 2505166950 & 2505166951 & 2505166953 & 2505166955 & 2505166956 & 2505166960 & 2505166961 & 2505166962 & 2505166963 & 2505166964 & 2505166965 & 2505166966 & 2505166967 & 2505166968 & 2505166969 & 2505166970 & 2505166971 & 2505166972 & 2505166973 & 2505166974 & 2505166975 & 2505166976 & 2505166977 & 25051625051663473 & 25051625051663474 & 2505167…	2
rxn00910	2505166020	3
rxn02286	2505167742	3
rxn03159	(2505168583 & 2505168851)	2
rxn03407	(2505167133 || 2505169287)	3
rxn05363	(2505168215 & 2505168261 & 2505168271 & 2505170513 & 2505170514)	2
rxn01107	2505169338	2
rxn01682	(2505170965 & 2505167561)	3
rxn02474	2505169548	3
rxn05324	2505167254	3
rxn00611	2505167464	2
rxn08300	2505171086	2
rxn00211	2505169115	2
rxn00776	(2505166952 & 250516582505165635 & 2505165635 & 2505169430 & 2505169881 & 2505166631)	2
rxn09110	2505168955	3
rxn02832	2505167323	2
rxn09296	(2505167582 & 2505167838 & 2505169727)	2
rxn12646	(2505167209 & 2505168734 & 2505169710 & 2505171163)	2
rxn01255	2505168294	3
rxn03194	(2505170041 || 2505165728)	3
rxn01360	2505170977	2
rxn03393	(2505166897 & 2505168599)	2
rxn08552	(2505167802 || 2505168262)	3
rxn05388	(2505168215 & 2505168261 & 2505168271 & 2505170513 & 2505170514)	2
rxn10311	2505168408	2
rxn01486	((2505167126) || (2505167126))	2
rxn01453	2505167191	2
rxn05464	2505167254	2
rxn00178	((2505167190) || (2505167190))	2
rxn10254	2505171086	2
rxn05545	(2505166739 & 2505167382 & 2505167383 & 2505167921 & 2505167925 & 2505168767 & 2505169486 & 2505171182 & 2505166388)	2
rxn02339	(2505169488 || 2505171077 || 2505170441)	3
rxn03958	2505170621	2
rxn05429	(2505168215 & 2505168261 & 2505168271 & 2505170513 & 2505170514)	2
rxn00713	2505171016	2
rxn05359	(2505168215 & 2505168261 & 2505168271 & 2505170513 & 2505170514)	2
rxn00898	2505171024	2
rxn01739	2505168597	3
rxn00288	(2505168142 & 2505166800)	3
rxn10203	(2505167802 || 2505168262)	3
rxn00347	2505169957	3
rxn00543	2505166244	3
rxn10052	(2505165862 || 2505166958)	3
rxn05406	2505168580	2
rxn05206	(2505166877 & 2505166130)	2
rxn05433	2505167254	2
rxn01069	(2505165746 || 2505166218)	3
rxn05322	2505167254	3
rxn00117	2505170026	3
rxn01997	(2505165931 & 2505169116 & 2505169653 & 2505169964)	2
rxn05373	2505168580	2
rxn00102	(2505169835 & 2505169876 & 2505166238)	2
rxn03236	(2505166884 & 2505167235)	2
rxn01790	(2505167321 & 2505169860)	2
rxn00097	(2505165862 || 2505166958)	3
rxn05458	2505168260	2
rxn05465	2505168260	2
rxn05453	2505168260	2
rxn00555	2505168275	3
rxn06591	2505170006	2
rxn05541	(2505166739 & 2505167382 & 2505167383 & 2505167921 & 2505167925 & 2505168767 & 2505169486 & 2505171182 & 2505166388)	2
rxn05528	(2505167083 & 2505167683 & 2505165703)	2
rxn08298	2505171086	2
rxn00747	2505168240	3
rxn00126	2505168382	2
rxn00414	(2505168986 & 2505166825)	3
rxn05547	(2505166739 & 2505167382 & 2505167383 & 2505167921 & 2505167925 & 2505168767 & 2505169486 & 2505171182 & 2505166388)	2
rxn01967	2505168018	2
rxn06937	2505170766	2
rxn02359	2505168835	3
rxn00260	(2505169488 || 2505171077 || 2505170441)	3
rxn00629	2505167148	2
rxn05538	(2505166739 & 2505167382 & 2505167383 & 2505167921 & 2505167925 & 2505168767 & 2505169486 & 2505171182 & 2505166388)	2
rxn00479	2505169414	2
rxn00707	2505168281	2
rxn03893	2505170393	3
rxn05452	2505168260	2
rxn02285	2505167741	3
rxn00980	2505166546	2
rxn02484	2505165791	2
rxn03108	2505165791	2
rxn10222	2505165637	2
rxn05337	(2505167183 & 2505167184 & 2505167839 & 2505168884 & 2505169263 & 2505169760 & 2505170252)	2
rxn03137	2505168873	2
rxn00392	2505169026	2
rxn03512	(2505167082 & 2505165784 & 2505167964)	2
rxn05367	(2505168215 & 2505168261 & 2505168271 & 2505170513 & 2505170514)	2
rxn05365	2505168580	2
rxn10213	2505168257	3
rxn00758	(2505166879 & 2505165617)	2
rxn00527	(2505169488 || 2505171077 || 2505170441 || 2505165616 || 2505167361)	3
rxn00328	2505166111	2
rxn04052	(2505167082 & 2505165784 & 2505167964)	2
rxn10118	2505169723	2
rxn05380	(2505167183 & 2505167184 & 2505167839 & 2505168884 & 2505169263 & 2505169760 & 2505170252)	2
rxn08549	(2505167802 || 2505168262)	3
rxn00237	2505170026	3
rxn05517	2505166135	2
rxn10312	2505168408	2
rxn00355	(2505167107 & 2505169452)	2
rxn00548	(2505165738 || 2505165968)	3
rxn13783	(2505167172 & 2505165754 & 2505167858 & 2505168846 & 32505165754 & 2505169018 & 2505165958 & 2505169416 & 2505169499 & 2505170037 & 2505170261 & 2505170498 & 2505170552 & 2505170655 & 2505170656 & 2505170657 & 2505171176 & 2505166269 & 2505165700)	2
rxn08126	2505165633	2
rxn04045	2505166660	2
rxn05331	2505168580	2
rxn00420	(2505166541 || 2505167639 || 2505167603 || 2505169736 || 2505168969 || 2505167281 || 2505168773 || 2505165951)	3
rxn05546	(2505166739 & 2505167382 & 2505167383 & 2505167921 & 2505167925 & 2505168767 & 2505169486 & 2505171182 & 2505166388)	2
rxn05336	(2505167183 & 2505167184 & 2505167839 & 2505168884 & 2505169263 & 2505169760 & 2505170252)	2
rxn02287	(2505166661 & 2505168556)	2
rxn02475	2505169548	3
rxn02508	2505167588	3
rxn00001	2505170374	3
rxn09111	2505168955	3
rxn09188	2505168835	2
rxn01476	2505170610	3
rxn10313	2505168408	2
rxn00127	2505167293	2
rxn00147	(2505165817 || 2505167376 || 2505168646)	3
rxn08295	2505171086	2
rxn00058	(2505169257 & 2505169258 & 2505169259)	2
rxn01974	2505169942	3
rxn02003	2505170559	2
rxn01644	2505165749	3
rxn05312	(2505168009 & 2505166074)	2
rxn06723	2505167167	2
rxn01108	2505166432	2
rxn01274	2505165919	2
rxn05251	(2505167015 & 2505167016 & 2505167017 & 2505167019 & 2505167022 & 2505167023 & 2505167690 & 2505167691 & 2505166060 & 2505166070 & 2505166073 & 2505170825 & 2505171060)	2
rxn12645	(2505167209 & 2505168734 & 2505169710 & 2505171163)	2
rxn02774	(2505166661 & 2505168556)	2
rxn05325	2505167254	3
rxn05516	(2505167083 & 2505167683 & 2505165703)	2
rxn05104	2505165680	2
rxn03057	2505168507	2
rxn07438	2505170707	2
rxn05608	(2505166988 & 2505168685 & 2505168686 & 2505168688 & 2505168689)	2
rxn02938	(2505167104 & 2505169990)	2
rxn02008	2505167555	3
rxn05439	2505167254	2
rxn01256	2505167663	3
rxn08336	2505170977	2
rxn05385	(2505167183 & 2505167184 & 2505167839 & 2505168884 & 2505169263 & 2505169760 & 2505170252)	2
rxn05339	(2505167183 & 2505167184 & 2505167839 & 2505168884 & 2505169263 & 2505169760 & 2505170252)	2
rxn04162	2505167333	2
rxn02898	2505166444	2
rxn05443	2505167254	2
rxn01210	2505166845	2
rxn02155	(2505167744 & 2505170940)	2
rxn03408	2505167482	3
rxn00299	2505170047	2
rxn05514	2505170986	2
rxn00224	(2505169471 & 2505170780)	2
rxn00839	2505170026	3
rxn00569	2505167495 & 2505167494)	3
rxn00461	2505170551	3
rxn10220	2505165637	2
rxn00139	2505169487	2
rxn03907	2505166323	2
rxn03395	(2505168133 & 2505169612 & 2505166094)	2
rxn02304	2505167541	2
rxn05451	2505168260	2
rxn05736	(2505167015 & 2505167016 & 2505167017 & 2505167019 & 2505167022 & 2505167023 & 2505167690 & 2505167691 & 2505166060 & 2505166070 & 2505166073 & 2505170825 & 2505171060)	2
rxn01485	2505168712	2
rxn08089	2505168257	3
rxn10253	2505171086	2
rxn13784	(2505166954 & 2505167536 & 2505165851 & 2505168775 & 2505168792 & 2505169156 & 2505170464 & 2505171169 & 2505171179 & 2505166383)	2
rxn00792	2505170337	2
rxn00283	2505169659	3
rxn05434	2505167254	2
rxn00931	2505167806	3
rxn01517	2505165701	3
rxn03904	2505169831	3
rxn01987	2505170758	2
rxn10212	2505168257	3
rxn05540	(2505166739 & 2505167382 & 2505167383 & 2505167921 & 2505167925 & 2505168767 & 2505169486 & 2505171182 & 2505166388)	2
rxn00851	2505168929	3
rxn00858	2505170711	3
rxn02465	2505166396	3
rxn01629	2505167006	2
rxn08335	2505170977	2
rxn00827	2505169986	2
rxn00137	2505166851	2
rxn10204	(2505167802 || 2505168262)	3
rxn00269	(2505167524 & 2505167546)	2
rxn05454	2505168260	2
rxn05179	(2505167910 & 2505167912 & 2505167913 & 2505168475 & 2505168477 & 2505168479 & 2505168484 & 2505168485 & 2505170278 & 2505170279)	2
rxn00190	2505170943	2
rxn00526	2505170102	2
rxn08711	2505166324	2
rxn00101	(2505170951 & 2505170954 & 2505170955)	3
rxn05417	(2505168215 & 2505168261 & 2505168271 & 2505170513 & 2505170514)	2
rxn03513	(2505169705 & 2505170115)	2
rxn02680	2505167190	2
rxn08086	2505168257	3
rxn00549	(2505169097 & 2505170007)	2
rxn05343	(2505168215 || 2505168261 || 2505168271 || 2505170513 || 2505170514)	3
rxn08129	2505165633	2
rxn00938	2505169170	2
rxn01022	2505165883	2
rxn12822	2505170210	3
rxn05449	2505167254	2
rxn05377	2505168580	2
rxn05205	2505167813	2
rxn08979	(2505166670 & 2505166671 & 2505169345 & 2505169346 & 2505166539)	3
rxn05459	2505168260	2
rxn10221	2505165637	2
rxn09177	2505169383	2
rxn01871	2505170823	2
rxn03437	2505171024	3
rxn00062	((2505169630 & 2505169408 & 2505169631 & 2505169629 & 2505169407 & 2505169625 & 2505169627 & 2505169628 & 2505169626) || 2505166988 || (2505171114 & 2505171115 & 2505171117 & 2505171118) || 2505170364)	3
rxn01208	SPONTANEOUS	2
rxn04132	SPONTANEOUS	2
rxn04133	SPONTANEOUS	2
rxn05319	SPONTANEOUS	2
rxn05467	SPONTANEOUS	2
rxn05468	SPONTANEOUS	2
rxn02374	SPONTANEOUS	2
rxn05116	SPONTANEOUS	2
rxn03012	SPONTANEOUS	2
rxn05064	SPONTANEOUS	2
rxn02666	SPONTANEOUS	2
rxn04457	SPONTANEOUS	2
rxn04456	SPONTANEOUS	2
rxn01664	SPONTANEOUS	2
rxn02916	SPONTANEOUS	2
rxn05667	SPONTANEOUS	2
rxn10571	UNIVERSAL	2
rxn05195	UNIVERSAL	2
rxn05555	UNIVERSAL	2
bio07630	BOF	2
rxn05722	AUTOCOMPLETION	2
rxn05255	AUTOCOMPLETION	2
rxn05236	2505169479	3
rxn05232	2505169479	3
rxn05144	AUTOCOMPLETION	2
rxn05039	(2505166329 || 2505168310)	3
rxn04139	2505166784	3
rxn00966	AUTOCOMPLETION	2
rxn00501	2505167234	3
EX_cpd00104(e)	Transport	0
EX_cpd00793(e)	Transport	0
EX_cpd00073(e)	Transport	0
EX_cpd00249(e)	Transport	0
EX_cpd03279(e)	Transport	0
EX_cpd00971(e)	Transport	0
EX_cpd11590(e)	Transport	0
EX_cpd00268(e)	Transport	0
EX_cpd00322(e)	Transport	0
EX_cpd00184(e)	Transport	0
EX_cpd00654(e)	Transport	0
EX_cpd00179(e)	Transport	0
EX_cpd00063(e)	Transport	0
EX_cpd00001(e)	Transport	0
EX_cpd11586(e)	Transport	0
EX_cpd00027(e)	Transport	0
EX_cpd00412(e)	Transport	0
EX_cpd11589(e)	Transport	0
EX_cpd15603(e)	Transport	0
EX_cpd11588(e)	Transport	0
EX_cpd00159(e)	Transport	0
EX_cpd00048(e)	Transport	0
EX_cpd00367(e)	Transport	0
EX_cpd01262(e)	Transport	0
EX_cpd15605(e)	Transport	0
EX_cpd00156(e)	Transport	0
EX_cpd00009(e)	Transport	0
EX_cpd15606(e)	Transport	0
EX_cpd00013(e)	Transport	0
EX_cpd10515(e)	Transport	0
EX_cpd00030(e)	Transport	0
EX_cpd11591(e)	Transport	0
EX_cpd00254(e)	Transport	0
EX_cpd00012(e)	Transport	0
EX_cpd11582(e)	Transport	0
EX_cpd00067(e)	Transport	0
EX_cpd00034(e)	Transport	0
EX_cpd04098(e)	Transport	0
EX_cpd15604(e)	Transport	0
EX_cpd00149(e)	Transport	0
EX_cpd11580(e)	Transport	0
EX_cpd00107(e)	Transport	0
EX_cpd00438(e)	Transport	0
EX_cpd11583(e)	Transport	0
EX_cpd00007(e)	Transport	0
EX_cpd00058(e)	Transport	0
EX_cpd01012(e)	Transport	0
EX_cpd11574(e)	Transport	0
EX_cpd00531(e)	Transport	0
EX_cpd00011(e)	Transport	0
EX_cpd11585(e)	Transport	0
EX_cpd00205(e)	Transport	0
EX_cpd01048(e)	Transport	0
EX_cpd11416_c	Transport	0
EX_cpd11584(e)	Transport	0
EX_cpd00264(e)	Transport	0
EX_cpd11593(e)	Transport	0
EX_cpd00099(e)	Transport	0
EX_cpd00182(e)	Transport	0
EX_cpd11592(e)	Transport	0
EX_cpd01329(e)	Transport	0
EX_cpd00277(e)	Transport	0
EX_cpd11581(e)	Transport	0
EX_cpd00224(e)	Transport	0
EX_cpd10516(e)	Transport	0
EX_cpd00118(e)	Transport	0
EX_cpd00393(e)	Transport	0
EX_cpd00246(e)	Transport	0
EX_cpd00053(e)	Transport	0
EX_cpd04097(e)	Transport	0
EX_cpd01017(e)	Transport	0
EX_cpd11587(e)	Transport	0
EX_photonI[e]	Transport	#VALUE!
EX_photonII[e]	Transport	0
NJ_PSII	(2505167966 & 2505169419 & 2505168887 & 2505168886 & 2505166376 & 2505166375 & 2505169593 & 2505168349 & 2505169592 & 2505169592 & 2505168322 & 2505165716 & 2505168232 & 2505170590 & 2505168220 & 2505166666 & 2505166665 & 2505168296 & 2505165663 & 2505165902 & 2505166663 & 2505165902 & 2505166664 & 2505170079 & 2505169490 & 2505166392 & 2505165717 & 2505166404 & 2505166307 & 2505166308 & 25051667…	3
NJ_citb6	(2505169770 & 2505168501 & 2505169769 & 2505168502 & 2505170453)	3
NJ_PSI	(2505169847 & 2505169846 & 2505168274 & 2505171069 & 2505168753 & 2505165725 & 2505168149 & 2505165726 & 2505167587 & 2505170413 & 2505168150 & 2505168179 & 2505168727)	2
NJ_cyclicPS	(2505169847 & 2505169846 & 2505168274 & 2505171069 & 2505168753 & 2505165725 & 2505168149 & 2505165726 & 2505167587 & 2505170413 & 2505168150 & 2505168179 & 2505168727)	3
NJ_FNR	(2505169847 & 2505169846 & 2505168274 & 2505171069 & 2505168753 & 2505165725 & 2505168149 & 2505165726 & 2505167587 & 2505170413 & 2505168150 & 2505168179 & 2505168727)	3
NJ_cyctochrome6	2505171062	3
NJ_cyctorchome6_reduced	(2505169770 & 2505168501 & 2505169769 & 2505168502 & 2505170453)	3
rxn00062	(2505169630 & 2505169408 & 2505169631 & 2505169629 & 2505169407 & 2505169625 & 2505169627 & 2505169628 & 2505169626)	3
rxn06117	2505169112	3
NJ_R04780	(2505169097 || 2505170007)	3
rxn02251	(2505170762 & 2505165766)	3
rxn04443	2505170664	3
rxn04676	2505170664	3
rxn04678	2505170664	3
rxn01202	2505167217	3
NJ_R01070	(2505166282 || 2505169777)	3
rxn00554	2505167140	3
rxn00556	2505167140	3
rxn00557	2505167140	3
rxn02315	2505167140	3
rxn02316	2505167140	3
rxn02317	2505167140	3
rxn00304	2505167661	3
rxn00411	2505167661	3
rxn00460	2505167661	3
rxn00517	2505167661	3
rxn00840	2505167661	3
rxn01354	2505167661	3
rxn01667	2505167661	3
rxn02936	2505166395	3
rxn01216	(2505170019 || 2505169225 || 2505165971 || 2505168909)	3
rxn00198	2505168569	3
rxn05778	(2505166476 || 2505169473)	3
rxn00647	(2505169488 || 2505171077 || 2505170441)	3
rxn01757	(2505169488 || 2505171077 || 2505170441)	3
rxn01906	(2505169488 || 2505171077 || 2505170441)	3
rxn01731	(2505166031 & 2505166030)	3
rxn02284	2505167741	3
rxn03141	2505168660	3
rxn00165		2
rxn07054	(2505166192 || 2505167467)	3
rxn00202	2505167522	3
rxn02749	(2505166495 & 2505167112)	3
rxn00499	2505168756	3
rxn00741	2505168756	3
rxn02228	2505168756	3
rxn01530	2505166244	3
rxn03282	2505166244	3
rxn03333	2505166244	3
rxn14054	2505166244	2
rxn14089	2505166244	2
rxn04726	2505166244	3
rxn04736	2505166244	3
rxn04908	2505166244	3
rxn11809	2505166244	3
rxn11834	2505166244	3
rxn11838	2505166244	3
rxn10770		2
rxn12191	2505166244	3
NJ_R09490	(2505168142 & 2505166800)	3
rxn00490	2505170603	3
rxn01268	2505170102	2
rxn02928	2505165781	3
rxn03087	(2505167581 || 2505170763)	3
NJ_R09365	2505170425	3
rxn07292	(2505169666 || 2505168898 || 2505166725)	3
rxn05779	(2505166476 || 2505169473)	3
rxn03373	2505165890	3
rxn00623		2
rxn05234	2505169479	3
rxn05235	2505169479	3
rxn06648	2505169479	3
rxn00107		2
rxn02517	2505170026	3
rxn11768	2505169729	3
rxn00916	2505168366	3
rxn11772	2505168366	3
rxn00657	2505170763	3
rxn01204	2505170763	3
rxn07243	2505166514	3
rxn11771	2505167158	3
rxn14401	(2505167802 || 2505168262)	3
rxn01953	2505169882	3
rxn05994	2505167254	3
rxn06238	(2505168215 || 2505168261 || 2505168271 || 2505170513 || 2505170514)	3
rxn07576	(2505168215 || 2505168261 || 2505168271 || 2505170513 || 2505170514)	3
rxn00003	(2505170041 || 2505165728)	3
NJ_R00226	(2505170041 || 2505165728)	3
rxn08043	(2505165728 & 2505170041)	2
rxn00154	(2505167096 || 2505169581)	3
rxn01242	(2505167096 || 2505169581)	3
NJ_R09067	2505170014	3
rxn02495	2505166991	3
rxn02922	2505166991	3
rxn06737	2505166991	3
rxn06893	2505170393	2
rxn03581	2505170393	2
rxn03702	2505170393	2
rxn03703	2505170393	2
rxn05030	2505170393	2
rxn07331	2505170393	3
rxn14061	2505170393	2
rxn14333	2505170393	2
rxn14334	2505170393	2
rxn14040	2505170393	2
rxn14011	2505170393	2
rxn13957	2505170393	2
rxn00942	2505166988	3
rxn01683	2505166988	3
rxn00176	2505169446	3
rxn00226	2505169446	3
rxn00674	2505169446	3
rxn06045	2505168955	3
rxn06240	2505166602	3
rxn00346		2
rxn01231	2505167018	3
rxn01784	2505167018	3
rxn00735		2
NJ_R04439	2505169860	3
NJ_R09247	2505168631	3
rxn00743	2505166162	3
rxn02166	2505166162	3
rxn03167	2505166162	3
rxn00566	2505166166	2
rxn00950	2505166166	3
NJ_R01286	2505166166	3
rxn01735	2505166166	3
rxn03379	2505166166	3
rxn00979	2505170539	3
NJ_R09077		1
rxn01963		2
rxn01539	(2505166329 || 2505168310)	3
rxn00653	2505169105	3
NJ_R02184	2505169112	3
pool_polyP	Sink	0
EX_cpd12854	Transport	0
KG_R01001	2505166166	1
pool_glycogen	Sink	0
KG_R04254	2505167309	1
pool_PHB	Sink	0
NJ_R02063	2505171150	2
cyanophycin_pool	2505166381	2
cyanophycinase	2505166382	2
pool_cyanophycin	Sink	0
		#VALUE!
		#VALUE!
		#VALUE!
		#VALUE!
		#VALUE!
		#VALUE!
		#VALUE!
		#VALUE!
		#VALUE!
		#VALUE!
		#VALUE!
		#VALUE!
		#VALUE!
		#VALUE!
		#VALUE!
		#VALUE!
		#VALUE!
		#VALUE!
		#VALUE!
		#VALUE!
		#VALUE!
		#VALUE!
		#VALUE!
		#VALUE!
		#VALUE!
		#VALUE!
		#VALUE!
		#VALUE!
		#VALUE!
		#VALUE!
		#VALUE!
		#VALUE!
		#VALUE!
		#VALUE!
		#VALUE!
		#VALUE!
		#VALUE!
		0
		0
		0
		0
		0
		0
		0
		0
		0
		0
		0
		0
		0
		0
		0
		0
		0
		0
		0
		0
		0
		0
		0
		0
		0
		0
		0
		0
		0
		0
		0
		0
		0
		0
		0
		0
		0
		0
		0
		0
		0
		0
		0
		0
		0
		0
		0
		0
		0
		0
		0
		0
		0
		0
		0
		0
		0
		0
		0
		0
		0
		0
		0
		0
		0
		0
		0
		0
		0
		0
		0
		0
		0
		0
		0
		0
		0
		0
		0
		0
		0
		0
		0
		0
		0
		0
		0
		0
		0
		0
		0
		0
		0
		0
		0
		0
		0
		0
		0
		0
		0
		0
		0
		0
		0
		0
		0
		0
		0
		0
		0
		0
		0
		0
		0
		0
		0
		0
		0
		0
		0
		0
		0
		0
		0
		0
		0
		0
		0
		0
		0
		0
		0
		0
		0
		0
		0
		0
		0
		0
		0
		0
		0
		0
		0
		0
		0
		0
		0
		0
		0
		0
		0
		0
		0
		0
		0
		0
		0
		0
		0
		0
		0
		0
		0
		0
		0
		0
		0
		0
		0
		0
		0
		0
		0
		0
		0
		0
		0
		0
		0
		0
		0
		0
		0
		0
		0
		0
		0
		0
		0
		0
		0
		0
		0
		0
		0
		0
		0
		0
		0
		0
		0
		0
		0
		0
		0
		0
		0
		0
		0
		0
		0
		0
		0
		0
		0
		0
		0
		0
		0
		0
		0
		0
		0
		0
		0
		0
		0
		0
		0
		0
		0
		0
		0
		0
		0
		0
		0
		0
		0
		0
		0
		0
		0
		0
		0
		0
		0
		0
		0
		0
		0
		0
		0
		0
		0
		0
		0
		0
		0
		0
		0
		0
		0
		0
		0
		0
		0
		0
		0
		0
		0
		0
		0
		0
		0
		0
		0
		0
		0
		0
		0
		0
		0
		0
		0
		0
		0
		0
		0
		0
		0
		0
		0
		0
		0
		0
		0
		0
		0
		0
		0
		0
		0
		0
		0
		0
		0
		0
		0
		0
		0
		0
		0
		0
		0
		0
		0
		0
		0
		0
		0
		0
		0
		0
		0
		0
		0
		0
		0
		0
		0
		0
		0
		0
		0
		0
		0
		0
		0
		0
		0
		0
		0
		0
		0
		0
		0
		0
		0

## Sheet: BOF
Amount (Stoichiometric coefficient)	Abbreviation
-0.00409535	Pyridoxal_phosphate
-0.180562	L-Phenylalanine
39.9959	Phosphate
-0.00409535	Fe2+
-0.00409535	Cu2+
-0.234679	L-Asparagine
-0.00409535	Tetrahydrofolate
-0.0924765	Bactoprenyl_diphosphate
-0.256013	L-Glutamine
-0.00409535	5-Methyltetrahydrofolate
-0.0551573	L-Tryptophan
-0.333546	L-Lysine
-0.00409535	2-Demethylmenaquinone_8
-0.438657	L-Leucine
-0.0235027	TTP
0.00409535	apo-ACP
-0.234679	L-Aspartate
-0.0926226	L-Histidine
40	H+
-0.215426	L-Proline
-0.595803	Glycine
1	Biomass
-0.246647	L-Threonine
-0.00409535	Zn2+
-0.00409535	K+
-0.00964	Glycogen
-0.129877	CTP
-0.00409535	Ubiquinone-8
-34.7965	H2O
0.00409535	Dimethylbenzimidazole
-0.00409535	Menaquinone_8
-0.500058	L-Alanine
-0.0924765	Peptidoglycan_polymer (n subunits)
0.602377	PPi
-0.209702	L-Serine
-0.00409535	ACP
40	ADP
-0.149341	L-Methionine
-0.00409535	Sulfate
-1	Protein_biosynthesis
-40.1701	ATP
-0.00409535	Mg
-0.00409535	Co2+
0.0924765	Peptidoglycan_polymer (n-1 subunits)
-0.00409535	CoA
-0.00409535	NADP
-0.00409535	TPP
-0.256013	L-Glutamate
-0.00409535	Mn2+
-0.0889802	L-Cysteine
-0.00409535	Calomide
-0.0235027	dATP
-0.288275	L-Arginine
-0.00409535	Spermidine
-0.00409535	Cl-
-0.00409535	fe3
-1	RNA_transcription
-0.00409535	Riboflavin
-0.140267	UTP
-0.282551	L-Isoleucine
-0.00409535	S-Adenosyl-L-methionine
-0.134251	L-Tyrosine
-0.00409535	Ca2+
-0.00409535	FAD
-0.00409535	NAD
-2.57e-05	Chlorophyll_a
-0.411598	L-Valine
-0.00409535	10-Formyltetrahydrofolate
0.00409535	Cobinamide
-1	DNA_replication
-0.209101	GTP

## Sheet: Minimal Media
Code	Name	UB	LB	Reaction index
cpd00971[e]	Na+	1000	-1000	941
cpd00063[e]	Ca2+	1000	-1000	948
cpd00001[e]	H2O	1000	-1000	949
cpd00048[e]	Sulfate	1000	-1000	957
cpd00009[e]	Phosphate	1000	-1000	962
cpd00013[e]	NH3	1000	-1000	964
cpd10515[e]	Fe2+	1000	-1000	965
cpd00030[e]	Mn2+	1000	-1000	966
cpd00254[e]	Mg	1000	-1000	968
cpd00067[e]	H+	1000	-1000	971
cpd00034[e]	Zn2+	1000	-1000	972
cpd04098[e]	Arsenite	1000	-1000	973
cpd00149[e]	Co2+	1000	-1000	975
cpd00007[e]	O2	1000	-1000	980
cpd00058[e]	Cu2+	1000	-1000	981
cpd01012[e]	Cd2+	1000	-1000	982
cpd11574[e]	Molybdate	1000	-1000	983
cpd00531[e]	Hg2+	1000	-1000	984
cpd00011[e]	CO2	1000	-1000	985
cpd00205[e]	K+	1000	-1000	987
cpd01048[e]	Arsenate	1000	-1000	988
cpd00099[e]	Cl-	1000	-1000	993
cpd10516[e]	fe3	1000	-1000	1000
photonI[e]	Photon of 700 spectra	0	X	1008
photonII[e]	Photon of 680 spectra	0	X	1009

## Sheet: Simulation Constraints
Flux (umol/day/g biomass) through sink/exchange reaction
Light					Dark
CO2	Glycogen	PHB	PolyP	Biomass	CO2	Glycogen	PHB	PolyP	Biomass
0	-2.084	89.8	1.45	0	0	-1.928	-153	3.17	0
0	0.428	89.8	1.45	0	0	0.376	-153	3.17	0
0	2.94	89.8	1.45	0	0	2.68	-153	3.17	0
0	5.452	89.8	1.45	0	0	4.984	-153	3.17	0
0	7.964	89.8	1.45	0	0	7.288	-153	3.17	0
0	10.476	89.8	1.45	0	0	9.592	-153	3.17	0
0	12.988	89.8	1.45	0	0	11.896	-153	3.17	0
0	15.5	89.8	1.45	0	0	14.2	-153	3.17	0
0	-9.62	112	1.45	0	0	-1.928	-132.6	3.17	0
0	-7.108	112	1.45	0	0	0.376	-132.6	3.17	0
0	-4.596	112	1.45	0	0	2.68	-132.6	3.17	0
0	-2.084	112	1.45	0	0	4.984	-132.6	3.17	0
0	0.428	112	1.45	0	0	7.288	-132.6	3.17	0
0	2.94	112	1.45	0	0	9.592	-132.6	3.17	0
0	5.452	112	1.45	0	0	11.896	-132.6	3.17	0
0	7.964	112	1.45	0	0	14.2	-132.6	3.17	0
0	10.476	112	1.45	0	0	-1.928	-112.2	3.17	0
0	12.988	112	1.45	0	0	0.376	-112.2	3.17	0
0	15.5	112	1.45	0	0	2.68	-112.2	3.17	0
0	-2.084	89.8	3.415	0	0	4.984	-112.2	3.17	0
0	0.428	89.8	3.415	0	0	7.288	-112.2	3.17	0
0	2.94	89.8	3.415	0	0	9.592	-112.2	3.17	0
0	5.452	89.8	3.415	0	0	11.896	-112.2	3.17	0
0	7.964	89.8	3.415	0	0	14.2	-112.2	3.17	0
0	10.476	89.8	3.415	0	0	-1.928	-91.8	3.17	0
0	12.988	89.8	3.415	0	0	0.376	-91.8	3.17	0
0	15.5	89.8	3.415	0	0	2.68	-91.8	3.17	0
0	-9.62	112	3.415	0	0	4.984	-91.8	3.17	0
0	-7.108	112	3.415	0	0	7.288	-91.8	3.17	0
0	-4.596	112	3.415	0	0	9.592	-91.8	3.17	0
0	-2.084	112	3.415	0	0	11.896	-91.8	3.17	0
0	0.428	112	3.415	0	0	14.2	-91.8	3.17	0
0	2.94	112	3.415	0	0	-1.928	-71.4	3.17	0
0	5.452	112	3.415	0	0	0.376	-71.4	3.17	0
0	7.964	112	3.415	0	0	2.68	-71.4	3.17	0
0	10.476	112	3.415	0	0	4.984	-71.4	3.17	0
0	12.988	112	3.415	0	0	7.288	-71.4	3.17	0
0	15.5	112	3.415	0	0	9.592	-71.4	3.17	0
0	-2.084	89.8	5.38	0	0	11.896	-71.4	3.17	0
0	0.428	89.8	5.38	0	0	14.2	-71.4	3.17	0
0	2.94	89.8	5.38	0	0	-1.928	-51	3.17	0
0	5.452	89.8	5.38	0	0	0.376	-51	3.17	0
0	7.964	89.8	5.38	0	0	2.68	-51	3.17	0
0	10.476	89.8	5.38	0	0	4.984	-51	3.17	0
0	12.988	89.8	5.38	0	0	7.288	-51	3.17	0
0	15.5	89.8	5.38	0	0	9.592	-51	3.17	0
0	-9.62	112	5.38	0	0	11.896	-51	3.17	0
0	-7.108	112	5.38	0	0	14.2	-51	3.17	0
0	-4.596	112	5.38	0	0	-1.928	-30.6	3.17	0
0	-2.084	112	5.38	0	0	0.376	-30.6	3.17	0
0	0.428	112	5.38	0	0	2.68	-30.6	3.17	0
0	2.94	112	5.38	0	0	4.984	-30.6	3.17	0
0	5.452	112	5.38	0	0	7.288	-30.6	3.17	0
0	7.964	112	5.38	0	0	9.592	-30.6	3.17	0
0	10.476	112	5.38	0	0	11.896	-30.6	3.17	0
0	12.988	112	5.38	0	0	14.2	-30.6	3.17	0
0	15.5	112	5.38	0	0	-1.928	-10.2	3.17	0
0	-2.084	89.8	7.345	0	0	0.376	-10.2	3.17	0
0	0.428	89.8	7.345	0	0	2.68	-10.2	3.17	0
0	2.94	89.8	7.345	0	0	4.984	-10.2	3.17	0
0	5.452	89.8	7.345	0	0	7.288	-10.2	3.17	0
0	7.964	89.8	7.345	0	0	9.592	-10.2	3.17	0
0	10.476	89.8	7.345	0	0	11.896	-10.2	3.17	0
0	12.988	89.8	7.345	0	0	14.2	-10.2	3.17	0
0	15.5	89.8	7.345	0	0	-8.84	10.2	3.17	0
0	-9.62	112	7.345	0	0	-6.536	10.2	3.17	0
0	-7.108	112	7.345	0	0	-4.232	10.2	3.17	0
0	-4.596	112	7.345	0	0	-1.928	10.2	3.17	0
0	-2.084	112	7.345	0	0	0.376	10.2	3.17	0
0	0.428	112	7.345	0	0	2.68	10.2	3.17	0
0	2.94	112	7.345	0	0	4.984	10.2	3.17	0
0	5.452	112	7.345	0	0	7.288	10.2	3.17	0
0	7.964	112	7.345	0	0	9.592	10.2	3.17	0
0	10.476	112	7.345	0	0	11.896	10.2	3.17	0
0	12.988	112	7.345	0	0	14.2	10.2	3.17	0
0	15.5	112	7.345	0	0	-8.84	30.6	3.17	0
0	-2.084	89.8	9.31	0	0	-6.536	30.6	3.17	0
0	0.428	89.8	9.31	0	0	-4.232	30.6	3.17	0
0	2.94	89.8	9.31	0	0	-1.928	30.6	3.17	0
0	5.452	89.8	9.31	0	0	0.376	30.6	3.17	0
0	7.964	89.8	9.31	0	0	2.68	30.6	3.17	0
0	10.476	89.8	9.31	0	0	4.984	30.6	3.17	0
0	12.988	89.8	9.31	0	0	7.288	30.6	3.17	0
0	15.5	89.8	9.31	0	0	9.592	30.6	3.17	0
0	-9.62	112	9.31	0	0	11.896	30.6	3.17	0
0	-7.108	112	9.31	0	0	14.2	30.6	3.17	0
0	-4.596	112	9.31	0	0	-8.84	51	3.17	0
0	-2.084	112	9.31	0	0	-6.536	51	3.17	0
0	0.428	112	9.31	0	0	-4.232	51	3.17	0
0	2.94	112	9.31	0	0	-1.928	51	3.17	0
0	5.452	112	9.31	0	0	0.376	51	3.17	0
0	7.964	112	9.31	0	0	2.68	51	3.17	0
0	10.476	112	9.31	0	0	4.984	51	3.17	0
0	12.988	112	9.31	0	0	7.288	51	3.17	0
0	15.5	112	9.31	0	0	9.592	51	3.17	0
0	-2.084	89.8	11.275	0	0	11.896	51	3.17	0
0	0.428	89.8	11.275	0	0	14.2	51	3.17	0
0	2.94	89.8	11.275	0	0	-4.232	-153	5.143	0
0	5.452	89.8	11.275	0	0	-1.928	-153	5.143	0
0	7.964	89.8	11.275	0	0	0.376	-153	5.143	0
0	10.476	89.8	11.275	0	0	2.68	-153	5.143	0
0	12.988	89.8	11.275	0	0	4.984	-153	5.143	0
0	15.5	89.8	11.275	0	0	7.288	-153	5.143	0
0	-9.62	112	11.275	0	0	9.592	-153	5.143	0
0	-7.108	112	11.275	0	0	11.896	-153	5.143	0
0	-4.596	112	11.275	0	0	14.2	-153	5.143	0
0	-2.084	112	11.275	0	0	-4.232	-132.6	5.143	0
0	0.428	112	11.275	0	0	-1.928	-132.6	5.143	0
0	2.94	112	11.275	0	0	0.376	-132.6	5.143	0
0	5.452	112	11.275	0	0	2.68	-132.6	5.143	0
0	7.964	112	11.275	0	0	4.984	-132.6	5.143	0
0	10.476	112	11.275	0	0	7.288	-132.6	5.143	0
0	12.988	112	11.275	0	0	9.592	-132.6	5.143	0
0	15.5	112	11.275	0	0	11.896	-132.6	5.143	0
0	-2.084	89.8	13.24	0	0	14.2	-132.6	5.143	0
0	0.428	89.8	13.24	0	0	-4.232	-112.2	5.143	0
0	2.94	89.8	13.24	0	0	-1.928	-112.2	5.143	0
0	5.452	89.8	13.24	0	0	0.376	-112.2	5.143	0
0	7.964	89.8	13.24	0	0	2.68	-112.2	5.143	0
0	10.476	89.8	13.24	0	0	4.984	-112.2	5.143	0
0	12.988	89.8	13.24	0	0	7.288	-112.2	5.143	0
0	15.5	89.8	13.24	0	0	9.592	-112.2	5.143	0
0	-9.62	112	13.24	0	0	11.896	-112.2	5.143	0
0	-7.108	112	13.24	0	0	14.2	-112.2	5.143	0
0	-4.596	112	13.24	0	0	-4.232	-91.8	5.143	0
0	-2.084	112	13.24	0	0	-1.928	-91.8	5.143	0
0	0.428	112	13.24	0	0	0.376	-91.8	5.143	0
0	2.94	112	13.24	0	0	2.68	-91.8	5.143	0
0	5.452	112	13.24	0	0	4.984	-91.8	5.143	0
0	7.964	112	13.24	0	0	7.288	-91.8	5.143	0
0	10.476	112	13.24	0	0	9.592	-91.8	5.143	0
0	12.988	112	13.24	0	0	11.896	-91.8	5.143	0
0	15.5	112	13.24	0	0	14.2	-91.8	5.143	0
0	-2.084	89.8	15.205	0	0	-4.232	-71.4	5.143	0
0	0.428	89.8	15.205	0	0	-1.928	-71.4	5.143	0
0	2.94	89.8	15.205	0	0	0.376	-71.4	5.143	0
0	5.452	89.8	15.205	0	0	2.68	-71.4	5.143	0
0	7.964	89.8	15.205	0	0	4.984	-71.4	5.143	0
0	10.476	89.8	15.205	0	0	7.288	-71.4	5.143	0
0	12.988	89.8	15.205	0	0	9.592	-71.4	5.143	0
0	15.5	89.8	15.205	0	0	11.896	-71.4	5.143	0
0	-9.62	112	15.205	0	0	14.2	-71.4	5.143	0
0	-7.108	112	15.205	0	0	-4.232	-51	5.143	0
0	-4.596	112	15.205	0	0	-1.928	-51	5.143	0
0	-2.084	112	15.205	0	0	0.376	-51	5.143	0
0	0.428	112	15.205	0	0	2.68	-51	5.143	0
0	2.94	112	15.205	0	0	4.984	-51	5.143	0
0	5.452	112	15.205	0	0	7.288	-51	5.143	0
0	7.964	112	15.205	0	0	9.592	-51	5.143	0
0	10.476	112	15.205	0	0	11.896	-51	5.143	0
0	12.988	112	15.205	0	0	14.2	-51	5.143	0
0	15.5	112	15.205	0	0	-4.232	-30.6	5.143	0
0	-2.084	89.8	17.17	0	0	-1.928	-30.6	5.143	0
0	0.428	89.8	17.17	0	0	0.376	-30.6	5.143	0
0	2.94	89.8	17.17	0	0	2.68	-30.6	5.143	0
0	5.452	89.8	17.17	0	0	4.984	-30.6	5.143	0
0	7.964	89.8	17.17	0	0	7.288	-30.6	5.143	0
0	10.476	89.8	17.17	0	0	9.592	-30.6	5.143	0
0	12.988	89.8	17.17	0	0	11.896	-30.6	5.143	0
0	15.5	89.8	17.17	0	0	14.2	-30.6	5.143	0
0	-9.62	112	17.17	0	0	-4.232	-10.2	5.143	0
0	-7.108	112	17.17	0	0	-1.928	-10.2	5.143	0
0	-4.596	112	17.17	0	0	0.376	-10.2	5.143	0
0	-2.084	112	17.17	0	0	2.68	-10.2	5.143	0
0	0.428	112	17.17	0	0	4.984	-10.2	5.143	0
0	2.94	112	17.17	0	0	7.288	-10.2	5.143	0
0	5.452	112	17.17	0	0	9.592	-10.2	5.143	0
0	7.964	112	17.17	0	0	11.896	-10.2	5.143	0
0	10.476	112	17.17	0	0	14.2	-10.2	5.143	0
0	12.988	112	17.17	0	0	-8.84	10.2	5.143	0
0	15.5	112	17.17	0	0	-6.536	10.2	5.143	0
0	-2.084	89.8	19.135	0	0	-4.232	10.2	5.143	0
0	0.428	89.8	19.135	0	0	-1.928	10.2	5.143	0
0	2.94	89.8	19.135	0	0	0.376	10.2	5.143	0
0	5.452	89.8	19.135	0	0	2.68	10.2	5.143	0
0	7.964	89.8	19.135	0	0	4.984	10.2	5.143	0
0	10.476	89.8	19.135	0	0	7.288	10.2	5.143	0
0	12.988	89.8	19.135	0	0	9.592	10.2	5.143	0
0	15.5	89.8	19.135	0	0	11.896	10.2	5.143	0
0	-9.62	112	19.135	0	0	14.2	10.2	5.143	0
0	-7.108	112	19.135	0	0	-8.84	30.6	5.143	0
0	-4.596	112	19.135	0	0	-6.536	30.6	5.143	0
0	-2.084	112	19.135	0	0	-4.232	30.6	5.143	0
0	0.428	112	19.135	0	0	-1.928	30.6	5.143	0
0	2.94	112	19.135	0	0	0.376	30.6	5.143	0
0	5.452	112	19.135	0	0	2.68	30.6	5.143	0
0	7.964	112	19.135	0	0	4.984	30.6	5.143	0
0	10.476	112	19.135	0	0	7.288	30.6	5.143	0
0	12.988	112	19.135	0	0	9.592	30.6	5.143	0
0	15.5	112	19.135	0	0	11.896	30.6	5.143	0
0	15.5	67.6	21.1	0	0	14.2	30.6	5.143	0
0	-2.084	89.8	21.1	0	0	-8.84	51	5.143	0
0	0.428	89.8	21.1	0	0	-6.536	51	5.143	0
0	2.94	89.8	21.1	0	0	-4.232	51	5.143	0
0	5.452	89.8	21.1	0	0	-1.928	51	5.143	0
0	7.964	89.8	21.1	0	0	0.376	51	5.143	0
0	10.476	89.8	21.1	0	0	2.68	51	5.143	0
0	12.988	89.8	21.1	0	0	4.984	51	5.143	0
0	15.5	89.8	21.1	0	0	7.288	51	5.143	0
0	-9.62	112	21.1	0	0	9.592	51	5.143	0
0	-7.108	112	21.1	0	0	11.896	51	5.143	0
0	-4.596	112	21.1	0	0	14.2	51	5.143	0
0	-2.084	112	21.1	0	0	-6.536	-153	7.116	0
0	0.428	112	21.1	0	0	-4.232	-153	7.116	0
0	2.94	112	21.1	0	0	-1.928	-153	7.116	0
0	5.452	112	21.1	0	0	0.376	-153	7.116	0
0	7.964	112	21.1	0	0	2.68	-153	7.116	0
0	10.476	112	21.1	0	0	4.984	-153	7.116	0
0	12.988	112	21.1	0	0	7.288	-153	7.116	0
0	15.5	112	21.1	0	0	9.592	-153	7.116	0
-278.167	-9.62	-110	21.1	18.4732	0	11.896	-153	7.116	0
-279.094	-9.62	-110	19.135	18.4952	0	14.2	-153	7.116	0
-280.02	-9.62	-110	17.17	18.5173	0	-6.536	-132.6	7.116	0
-280.947	-9.62	-110	15.205	18.5393	0	-4.232	-132.6	7.116	0
-281.874	-9.62	-110	13.24	18.5614	0	-1.928	-132.6	7.116	0
-282.579	-7.108	-110	21.1	18.2194	0	0.376	-132.6	7.116	0
-282.8	-9.62	-110	11.275	18.5835	0	2.68	-132.6	7.116	0
-283.224	-9.62	-87.8	21.1	16.4793	0	4.984	-132.6	7.116	0
-283.506	-7.108	-110	19.135	18.2414	0	7.288	-132.6	7.116	0
-283.727	-9.62	-110	9.31	18.6055	0	9.592	-132.6	7.116	0
-284.151	-9.62	-87.8	19.135	16.5014	0	11.896	-132.6	7.116	0
-284.432	-7.108	-110	17.17	18.2635	0	14.2	-132.6	7.116	0
-284.653	-9.62	-110	7.345	18.6276	0	-6.536	-112.2	7.116	0
-285.077	-9.62	-87.8	17.17	16.5234	0	-4.232	-112.2	7.116	0
-285.359	-7.108	-110	15.205	18.2855	0	-1.928	-112.2	7.116	0
-285.58	-9.62	-110	5.38	18.6496	0	0.376	-112.2	7.116	0
-286.004	-9.62	-87.8	15.205	16.5455	0	2.68	-112.2	7.116	0
-286.285	-7.108	-110	13.24	18.3076	0	4.984	-112.2	7.116	0
-286.506	-9.62	-110	3.415	18.6717	0	7.288	-112.2	7.116	0
-286.93	-9.62	-87.8	13.24	16.5676	0	9.592	-112.2	7.116	0
-286.991	-4.596	-110	21.1	17.9655	0	11.896	-112.2	7.116	0
-287.212	-7.108	-110	11.275	18.3297	0	14.2	-112.2	7.116	0
-287.433	-9.62	-110	1.45	18.6938	0	-6.536	-91.8	7.116	0
-287.636	-7.108	-87.8	21.1	16.2255	0	-4.232	-91.8	7.116	0
-287.857	-9.62	-87.8	11.275	16.5896	0	-1.928	-91.8	7.116	0
-287.917	-4.596	-110	19.135	17.9876	0	0.376	-91.8	7.116	0
-288.138	-7.108	-110	9.31	18.3517	0	2.68	-91.8	7.116	0
-288.281	-9.62	-65.6	21.1	14.4855	0	4.984	-91.8	7.116	0
-288.562	-7.108	-87.8	19.135	16.2476	0	7.288	-91.8	7.116	0
-288.784	-9.62	-87.8	9.31	16.6117	0	9.592	-91.8	7.116	0
-288.844	-4.596	-110	17.17	18.0097	0	11.896	-91.8	7.116	0
-289.065	-7.108	-110	7.345	18.3738	0	14.2	-91.8	7.116	0
-289.208	-9.62	-65.6	19.135	14.5075	0	-6.536	-71.4	7.116	0
-289.489	-7.108	-87.8	17.17	16.2696	0	-4.232	-71.4	7.116	0
-289.71	-9.62	-87.8	7.345	16.6337	0	-1.928	-71.4	7.116	0
-289.77	-4.596	-110	15.205	18.0317	0	0.376	-71.4	7.116	0
-289.991	-7.108	-110	5.38	18.3958	0	2.68	-71.4	7.116	0
-290.134	-9.62	-65.6	17.17	14.5296	0	4.984	-71.4	7.116	0
-290.416	-7.108	-87.8	15.205	16.2917	0	7.288	-71.4	7.116	0
-290.637	-9.62	-87.8	5.38	16.6558	0	9.592	-71.4	7.116	0
-290.697	-4.596	-110	13.24	18.0538	0	11.896	-71.4	7.116	0
-290.918	-7.108	-110	3.415	18.4179	0	14.2	-71.4	7.116	0
-291.061	-9.62	-65.6	15.205	14.5517	0	-6.536	-51	7.116	0
-291.342	-7.108	-87.8	13.24	16.3137	0	-4.232	-51	7.116	0
-291.402	-2.084	-110	21.1	17.7117	0	-1.928	-51	7.116	0
-291.563	-9.62	-87.8	3.415	16.6779	0	0.376	-51	7.116	0
-291.624	-4.596	-110	11.275	18.0758	0	2.68	-51	7.116	0
-291.845	-7.108	-110	1.45	18.44	0	4.984	-51	7.116	0
-291.987	-9.62	-65.6	13.24	14.5737	0	7.288	-51	7.116	0
-292.048	-4.596	-87.8	21.1	15.9717	0	9.592	-51	7.116	0
-292.269	-7.108	-87.8	11.275	16.3358	0	11.896	-51	7.116	0
-292.329	-2.084	-110	19.135	17.7338	0	14.2	-51	7.116	0
-292.49	-9.62	-87.8	1.45	16.6999	0	-6.536	-30.6	7.116	0
-292.55	-4.596	-110	9.31	18.0979	0	-4.232	-30.6	7.116	0
-292.693	-7.108	-65.6	21.1	14.2317	0	-1.928	-30.6	7.116	0
-292.914	-9.62	-65.6	11.275	14.5958	0	0.376	-30.6	7.116	0
-292.974	-4.596	-87.8	19.135	15.9938	0	2.68	-30.6	7.116	0
-293.195	-7.108	-87.8	9.31	16.3579	0	4.984	-30.6	7.116	0
-293.256	-2.084	-110	17.17	17.7558	0	7.288	-30.6	7.116	0
-293.338	-9.62	-43.4	21.1	12.4916	0	9.592	-30.6	7.116	0
-293.477	-4.596	-110	7.345	18.12	0	11.896	-30.6	7.116	0
-293.619	-7.108	-65.6	19.135	14.2537	0	14.2	-30.6	7.116	0
-293.84	-9.62	-65.6	9.31	14.6178	0	-6.536	-10.2	7.116	0
-293.901	-4.596	-87.8	17.17	16.0158	0	-4.232	-10.2	7.116	0
-294.122	-7.108	-87.8	7.345	16.3799	0	-1.928	-10.2	7.116	0
-294.182	-2.084	-110	15.205	17.7779	0	0.376	-10.2	7.116	0
-294.265	-9.62	-43.4	19.135	12.5137	0	2.68	-10.2	7.116	0
-294.403	-4.596	-110	5.38	18.142	0	4.984	-10.2	7.116	0
-294.546	-7.108	-65.6	17.17	14.2758	0	7.288	-10.2	7.116	0
-294.767	-9.62	-65.6	7.345	14.6399	0	9.592	-10.2	7.116	0
-294.827	-4.596	-87.8	15.205	16.0379	0	11.896	-10.2	7.116	0
-295.048	-7.108	-87.8	5.38	16.402	0	14.2	-10.2	7.116	0
-295.109	-2.084	-110	13.24	17.8	0	-8.84	10.2	7.116	0
-295.191	-9.62	-43.4	17.17	12.5357	0	-6.536	10.2	7.116	0
-295.33	-4.596	-110	3.415	18.1641	0	-4.232	10.2	7.116	0
-295.472	-7.108	-65.6	15.205	14.2978	0	-1.928	10.2	7.116	0
-295.694	-9.62	-65.6	5.38	14.662	0	0.376	10.2	7.116	0
-295.754	-4.596	-87.8	13.24	16.0599	0	2.68	10.2	7.116	0
-295.814	0.428	-110	21.1	17.4579	0	4.984	10.2	7.116	0
-295.975	-7.108	-87.8	3.415	16.424	0	7.288	10.2	7.116	0
-296.035	-2.084	-110	11.275	17.822	0	9.592	10.2	7.116	0
-296.118	-9.62	-43.4	15.205	12.5578	0	11.896	10.2	7.116	0
-296.256	-4.596	-110	1.45	18.1861	0	14.2	10.2	7.116	0
-296.399	-7.108	-65.6	13.24	14.3199	0	-8.84	30.6	7.116	0
-296.459	-2.084	-87.8	21.1	15.7179	0	-6.536	30.6	7.116	0
-296.62	-9.62	-65.6	3.415	14.684	0	-4.232	30.6	7.116	0
-296.68	-4.596	-87.8	11.275	16.082	0	-1.928	30.6	7.116	0
-296.741	0.428	-110	19.135	17.48	0	0.376	30.6	7.116	0
-296.901	-7.108	-87.8	1.45	16.4461	0	2.68	30.6	7.116	0
-296.962	-2.084	-110	9.31	17.8441	0	4.984	30.6	7.116	0
-297.044	-9.62	-43.4	13.24	12.5799	0	7.288	30.6	7.116	0
-297.105	-4.596	-65.6	21.1	13.9778	0	9.592	30.6	7.116	0
-297.326	-7.108	-65.6	11.275	14.342	0	11.896	30.6	7.116	0
-297.386	-2.084	-87.8	19.135	15.7399	0	14.2	30.6	7.116	0
-297.547	-9.62	-65.6	1.45	14.7061	0	-8.84	51	7.116	0
-297.607	-4.596	-87.8	9.31	16.1041	0	-6.536	51	7.116	0
-297.667	0.428	-110	17.17	17.502	0	-4.232	51	7.116	0
-297.75	-7.108	-43.4	21.1	12.2378	0	-1.928	51	7.116	0
-297.888	-2.084	-110	7.345	17.8662	0	0.376	51	7.116	0
-297.971	-9.62	-43.4	11.275	12.6019	0	2.68	51	7.116	0
-298.031	-4.596	-65.6	19.135	13.9999	0	4.984	51	7.116	0
-298.252	-7.108	-65.6	9.31	14.364	0	7.288	51	7.116	0
-298.313	-2.084	-87.8	17.17	15.762	0	9.592	51	7.116	0
-298.395	-9.62	-21.2	21.1	10.4978	0	11.896	51	7.116	0
-298.534	-4.596	-87.8	7.345	16.1261	0	14.2	51	7.116	0
-298.594	0.428	-110	15.205	17.5241	0	-8.84	-153	9.089	0
-298.676	-7.108	-43.4	19.135	12.2599	0	-6.536	-153	9.089	0
-298.815	-2.084	-110	5.38	17.8882	0	-4.232	-153	9.089	0
-298.897	-9.62	-43.4	9.31	12.624	0	-1.928	-153	9.089	0
-298.958	-4.596	-65.6	17.17	14.022	0	0.376	-153	9.089	0
-299.179	-7.108	-65.6	7.345	14.3861	0	2.68	-153	9.089	0
-299.239	-2.084	-87.8	15.205	15.7841	0	4.984	-153	9.089	0
-299.321	-9.62	-21.2	19.135	10.5198	0	7.288	-153	9.089	0
-299.46	-4.596	-87.8	5.38	16.1482	0	9.592	-153	9.089	0
-299.52	0.428	-110	13.24	17.5462	0	11.896	-153	9.089	0
-299.603	-7.108	-43.4	17.17	12.2819	0	14.2	-153	9.089	0
-299.741	-2.084	-110	3.415	17.9103	0	-8.84	-132.6	9.089	0
-299.824	-9.62	-43.4	7.345	12.646	0	-6.536	-132.6	9.089	0
-299.884	-4.596	-65.6	15.205	14.044	0	-4.232	-132.6	9.089	0
-300.105	-7.108	-65.6	5.38	14.4081	0	-1.928	-132.6	9.089	0
-300.166	-2.084	-87.8	13.24	15.8061	0	0.376	-132.6	9.089	0
-300.226	2.94	-110	21.1	17.2041	0	2.68	-132.6	9.089	0
-300.248	-9.62	-21.2	17.17	10.5419	0	4.984	-132.6	9.089	0
-300.387	-4.596	-87.8	3.415	16.1702	0	7.288	-132.6	9.089	0
-300.447	0.428	-110	11.275	17.5682	0	9.592	-132.6	9.089	0
-300.529	-7.108	-43.4	15.205	12.304	0	11.896	-132.6	9.089	0
-300.668	-2.084	-110	1.45	17.9323	0	14.2	-132.6	9.089	0
-300.75	-9.62	-43.4	5.38	12.6681	0	-8.84	-112.2	9.089	0
-300.811	-4.596	-65.6	13.24	14.0661	0	-6.536	-112.2	9.089	0
-300.871	0.428	-87.8	21.1	15.4641	0	-4.232	-112.2	9.089	0
-301.032	-7.108	-65.6	3.415	14.4302	0	-1.928	-112.2	9.089	0
-301.092	-2.084	-87.8	11.275	15.8282	0	0.376	-112.2	9.089	0
-301.153	2.94	-110	19.135	17.2262	0	2.68	-112.2	9.089	0
-301.175	-9.62	-21.2	15.205	10.564	0	4.984	-112.2	9.089	0
-301.313	-4.596	-87.8	1.45	16.1923	0	7.288	-112.2	9.089	0
-301.374	0.428	-110	9.31	17.5903	0	9.592	-112.2	9.089	0
-301.456	-7.108	-43.4	13.24	12.3261	0	11.896	-112.2	9.089	0
-301.516	-2.084	-65.6	21.1	13.724	0	14.2	-112.2	9.089	0
-301.677	-9.62	-43.4	3.415	12.6902	0	-8.84	-91.8	9.089	0
-301.737	-4.596	-65.6	11.275	14.0881	0	-6.536	-91.8	9.089	0
-301.798	0.428	-87.8	19.135	15.4861	0	-4.232	-91.8	9.089	0
-301.958	-7.108	-65.6	1.45	14.4523	0	-1.928	-91.8	9.089	0
-302.019	-2.084	-87.8	9.31	15.8502	0	0.376	-91.8	9.089	0
-302.079	2.94	-110	17.17	17.2482	0	2.68	-91.8	9.089	0
-302.101	-9.62	-21.2	13.24	10.586	0	4.984	-91.8	9.089	0
-302.161	-4.596	-43.4	21.1	11.984	0	7.288	-91.8	9.089	0
-302.3	0.428	-110	7.345	17.6123	0	9.592	-91.8	9.089	0
-302.383	-7.108	-43.4	11.275	12.3481	0	11.896	-91.8	9.089	0
-302.443	-2.084	-65.6	19.135	13.7461	0	14.2	-91.8	9.089	0
-302.604	-9.62	-43.4	1.45	12.7122	0	-8.84	-71.4	9.089	0
-302.664	-4.596	-65.6	9.31	14.1102	0	-6.536	-71.4	9.089	0
-302.724	0.428	-87.8	17.17	15.5082	0	-4.232	-71.4	9.089	0
-302.807	-7.108	-21.2	21.1	10.244	0	-1.928	-71.4	9.089	0
-302.945	-2.084	-87.8	7.345	15.8723	0	0.376	-71.4	9.089	0
-303.006	2.94	-110	15.205	17.2703	0	2.68	-71.4	9.089	0
-303.028	-9.62	-21.2	11.275	10.6081	0	4.984	-71.4	9.089	0
-303.088	-4.596	-43.4	19.135	12.0061	0	7.288	-71.4	9.089	0
-303.227	0.428	-110	5.38	17.6344	0	9.592	-71.4	9.089	0
-303.309	-7.108	-43.4	9.31	12.3702	0	11.896	-71.4	9.089	0
-303.369	-2.084	-65.6	17.17	13.7682	0	14.2	-71.4	9.089	0
-303.452	-9.62	1	21.1	8.50393	0	-8.84	-51	9.089	0
-303.59	-4.596	-65.6	7.345	14.1323	0	-6.536	-51	9.089	0
-303.651	0.428	-87.8	15.205	15.5303	0	-4.232	-51	9.089	0
-303.733	-7.108	-21.2	19.135	10.266	0	-1.928	-51	9.089	0
-303.872	-2.084	-87.8	5.38	15.8944	0	0.376	-51	9.089	0
-303.932	2.94	-110	13.24	17.2923	0	2.68	-51	9.089	0
-303.954	-9.62	-21.2	9.31	10.6301	0	4.984	-51	9.089	0
-304.015	-4.596	-43.4	17.17	12.0281	0	7.288	-51	9.089	0
-304.153	0.428	-110	3.415	17.6565	0	9.592	-51	9.089	0
-304.236	-7.108	-43.4	7.345	12.3922	0	11.896	-51	9.089	0
-304.296	-2.084	-65.6	15.205	13.7902	0	14.2	-51	9.089	0
-304.378	-9.62	1	19.135	8.52599	0	-8.84	-30.6	9.089	0
-304.517	-4.596	-65.6	5.38	14.1543	0	-6.536	-30.6	9.089	0
-304.577	0.428	-87.8	13.24	15.5523	0	-4.232	-30.6	9.089	0
-304.638	5.452	-110	21.1	16.9503	0	-1.928	-30.6	9.089	0
-304.66	-7.108	-21.2	17.17	10.2881	0	0.376	-30.6	9.089	0
-304.798	-2.084	-87.8	3.415	15.9164	0	2.68	-30.6	9.089	0
-304.859	2.94	-110	11.275	17.3144	0	4.984	-30.6	9.089	0
-304.881	-9.62	-21.2	7.345	10.6522	0	7.288	-30.6	9.089	0
-304.941	-4.596	-43.4	15.205	12.0502	0	9.592	-30.6	9.089	0
-305.08	0.428	-110	1.45	17.6785	0	11.896	-30.6	9.089	0
-305.162	-7.108	-43.4	5.38	12.4143	0	14.2	-30.6	9.089	0
-305.223	-2.084	-65.6	13.24	13.8123	0	-8.84	-10.2	9.089	0
-305.283	2.94	-87.8	21.1	15.2103	0	-6.536	-10.2	9.089	0
-305.305	-9.62	1	17.17	8.54805	0	-4.232	-10.2	9.089	0
-305.444	-4.596	-65.6	3.415	14.1764	0	-1.928	-10.2	9.089	0
-305.504	0.428	-87.8	11.275	15.5744	0	0.376	-10.2	9.089	0
-305.564	5.452	-110	19.135	16.9724	0	2.68	-10.2	9.089	0
-305.586	-7.108	-21.2	15.205	10.3101	0	4.984	-10.2	9.089	0
-305.725	-2.084	-87.8	1.45	15.9385	0	7.288	-10.2	9.089	0
-305.785	2.94	-110	9.31	17.3365	0	9.592	-10.2	9.089	0
-305.807	-9.62	-21.2	5.38	10.6743	0	11.896	-10.2	9.089	0
-305.868	-4.596	-43.4	13.24	12.0722	0	14.2	-10.2	9.089	0
-305.928	0.428	-65.6	21.1	13.4702	0	-8.84	10.2	9.089	0
-306.089	-7.108	-43.4	3.415	12.4364	0	-6.536	10.2	9.089	0
-306.149	-2.084	-65.6	11.275	13.8343	0	-4.232	10.2	9.089	0
-306.209	2.94	-87.8	19.135	15.2323	0	-1.928	10.2	9.089	0
-306.231	-9.62	1	15.205	8.57011	0	0.376	10.2	9.089	0
-306.37	-4.596	-65.6	1.45	14.1985	0	2.68	10.2	9.089	0
-306.43	0.428	-87.8	9.31	15.5964	0	4.984	10.2	9.089	0
-306.491	5.452	-110	17.17	16.9944	0	7.288	10.2	9.089	0
-306.513	-7.108	-21.2	13.24	10.3322	0	9.592	10.2	9.089	0
-306.573	-2.084	-43.4	21.1	11.7302	0	11.896	10.2	9.089	0
-306.712	2.94	-110	7.345	17.3585	0	14.2	10.2	9.089	0
-306.734	-9.62	-21.2	3.415	10.6963	0	-8.84	30.6	9.089	0
-306.794	-4.596	-43.4	11.275	12.0943	0	-6.536	30.6	9.089	0
-306.855	0.428	-65.6	19.135	13.4923	0	-4.232	30.6	9.089	0
-307.015	-7.108	-43.4	1.45	12.4584	0	-1.928	30.6	9.089	0
-307.076	-2.084	-65.6	9.31	13.8564	0	0.376	30.6	9.089	0
-307.136	2.94	-87.8	17.17	15.2544	0	2.68	30.6	9.089	0
-307.158	-9.62	1	13.24	8.59217	0	4.984	30.6	9.089	0
-307.218	-4.596	-21.2	21.1	9.99016	0	7.288	30.6	9.089	0
-307.357	0.428	-87.8	7.345	15.6185	0	9.592	30.6	9.089	0
-307.417	5.452	-110	15.205	17.0165	0	11.896	30.6	9.089	0
-307.439	-7.108	-21.2	11.275	10.3543	0	14.2	30.6	9.089	0
-307.5	-2.084	-43.4	19.135	11.7523	0	-8.84	51	9.089	0
-307.638	2.94	-110	5.38	17.3806	0	-6.536	51	9.089	0
-307.66	-9.62	-21.2	1.45	10.7184	0	-4.232	51	9.089	0
-307.721	-4.596	-43.4	9.31	12.1164	0	-1.928	51	9.089	0
-307.781	0.428	-65.6	17.17	13.5143	0	0.376	51	9.089	0
-307.864	-7.108	1	21.1	8.25012	0	2.68	51	9.089	0
-308.002	-2.084	-65.6	7.345	13.8785	0	4.984	51	9.089	0
-308.063	2.94	-87.8	15.205	15.2764	0	7.288	51	9.089	0
-308.085	-9.62	1	11.275	8.61423	0	9.592	51	9.089	0
-308.145	-4.596	-21.2	19.135	10.0122	0	11.896	51	9.089	0
-308.284	0.428	-87.8	5.38	15.6406	0	14.2	51	9.089	0
-308.344	5.452	-110	13.24	17.0385	0	-8.84	-153	11.062	0
-308.366	-7.108	-21.2	9.31	10.3763	0	-6.536	-153	11.062	0
-308.426	-2.084	-43.4	17.17	11.7743	0	-4.232	-153	11.062	0
-308.509	-9.62	23.2	21.1	6.51009	0	-1.928	-153	11.062	0
-308.565	2.94	-110	3.415	17.4026	0	0.376	-153	11.062	0
-308.647	-4.596	-43.4	7.345	12.1384	0	2.68	-153	11.062	0
-308.708	0.428	-65.6	15.205	13.5364	0	4.984	-153	11.062	0
-308.79	-7.108	1	19.135	8.27218	0	7.288	-153	11.062	0
-308.929	-2.084	-65.6	5.38	13.9005	0	9.592	-153	11.062	0
-308.989	2.94	-87.8	13.24	15.2985	0	11.896	-153	11.062	0
-309.011	-9.62	1	9.31	8.63629	0	14.2	-153	11.062	0
-309.049	7.964	-110	21.1	16.6965	0	-8.84	-132.6	11.062	0
-309.071	-4.596	-21.2	17.17	10.0343	0	-6.536	-132.6	11.062	0
-309.21	0.428	-87.8	3.415	15.6626	0	-4.232	-132.6	11.062	0
-309.27	5.452	-110	11.275	17.0606	0	-1.928	-132.6	11.062	0
-309.293	-7.108	-21.2	7.345	10.3984	0	0.376	-132.6	11.062	0
-309.353	-2.084	-43.4	15.205	11.7964	0	2.68	-132.6	11.062	0
-309.435	-9.62	23.2	19.135	6.53215	0	4.984	-132.6	11.062	0
-309.491	2.94	-110	1.45	17.4247	0	7.288	-132.6	11.062	0
-309.574	-4.596	-43.4	5.38	12.1605	0	9.592	-132.6	11.062	0
-309.634	0.428	-65.6	13.24	13.5585	0	11.896	-132.6	11.062	0
-309.695	5.452	-87.8	21.1	14.9564	0	14.2	-132.6	11.062	0
-309.717	-7.108	1	17.17	8.29424	0	-8.84	-112.2	11.062	0
-309.855	-2.084	-65.6	3.415	13.9226	0	-6.536	-112.2	11.062	0
-309.916	2.94	-87.8	11.275	15.3206	0	-4.232	-112.2	11.062	0
-309.938	-9.62	1	7.345	8.65835	0	-1.928	-112.2	11.062	0
-309.976	7.964	-110	19.135	16.7185	0	0.376	-112.2	11.062	0
-309.998	-4.596	-21.2	15.205	10.0563	0	2.68	-112.2	11.062	0
-310.137	0.428	-87.8	1.45	15.6847	0	4.984	-112.2	11.062	0
-310.197	5.452	-110	9.31	17.0827	0	7.288	-112.2	11.062	0
-310.219	-7.108	-21.2	5.38	10.4204	0	9.592	-112.2	11.062	0
-310.279	-2.084	-43.4	13.24	11.8184	0	11.896	-112.2	11.062	0
-310.34	2.94	-65.6	21.1	13.2164	0	14.2	-112.2	11.062	0
-310.362	-9.62	23.2	17.17	6.55421	0	-8.84	-91.8	11.062	0
-310.5	-4.596	-43.4	3.415	12.1825	0	-6.536	-91.8	11.062	0
-310.561	0.428	-65.6	11.275	13.5805	0	-4.232	-91.8	11.062	0
-310.621	5.452	-87.8	19.135	14.9785	0	-1.928	-91.8	11.062	0
-310.643	-7.108	1	15.205	8.3163	0	0.376	-91.8	11.062	0
-310.782	-2.084	-65.6	1.45	13.9446	0	2.68	-91.8	11.062	0
-310.842	2.94	-87.8	9.31	15.3426	0	4.984	-91.8	11.062	0
-310.864	-9.62	1	5.38	8.68041	0	7.288	-91.8	11.062	0
-310.903	7.964	-110	17.17	16.7406	0	9.592	-91.8	11.062	0
-310.925	-4.596	-21.2	13.24	10.0784	0	11.896	-91.8	11.062	0
-310.985	0.428	-43.4	21.1	11.4764	0	14.2	-91.8	11.062	0
-311.124	5.452	-110	7.345	17.1047	0	-8.84	-71.4	11.062	0
-311.146	-7.108	-21.2	3.415	10.4425	0	-6.536	-71.4	11.062	0
-311.206	-2.084	-43.4	11.275	11.8405	0	-4.232	-71.4	11.062	0
-311.266	2.94	-65.6	19.135	13.2385	0	-1.928	-71.4	11.062	0
-311.288	-9.62	23.2	15.205	6.57627	0	0.376	-71.4	11.062	0
-311.427	-4.596	-43.4	1.45	12.2046	0	2.68	-71.4	11.062	0
-311.487	0.428	-65.6	9.31	13.6026	0	4.984	-71.4	11.062	0
-311.548	5.452	-87.8	17.17	15.0006	0	7.288	-71.4	11.062	0
-311.57	-7.108	1	13.24	8.33836	0	9.592	-71.4	11.062	0
-311.63	-2.084	-21.2	21.1	9.73634	0	11.896	-71.4	11.062	0
-311.769	2.94	-87.8	7.345	15.3647	0	14.2	-71.4	11.062	0
-311.791	-9.62	1	3.415	8.70247	0	-8.84	-51	11.062	0
-311.829	7.964	-110	15.205	16.7627	0	-6.536	-51	11.062	0
-311.851	-4.596	-21.2	11.275	10.1005	0	-4.232	-51	11.062	0
-311.911	0.428	-43.4	19.135	11.4984	0	-1.928	-51	11.062	0
-312.05	5.452	-110	5.38	17.1268	0	0.376	-51	11.062	0
-312.072	-7.108	-21.2	1.45	10.4646	0	2.68	-51	11.062	0
-312.133	-2.084	-43.4	9.31	11.8626	0	4.984	-51	11.062	0
-312.193	2.94	-65.6	17.17	13.2605	0	7.288	-51	11.062	0
-312.215	-9.62	23.2	13.24	6.59833	0	9.592	-51	11.062	0
-312.275	-4.596	1	21.1	7.99631	0	11.896	-51	11.062	0
-312.414	0.428	-65.6	7.345	13.6246	0	14.2	-51	11.062	0
-312.474	5.452	-87.8	15.205	15.0226	0	-8.84	-30.6	11.062	0
-312.496	-7.108	1	11.275	8.36042	0	-6.536	-30.6	11.062	0
-312.557	-2.084	-21.2	19.135	9.7584	0	-4.232	-30.6	11.062	0
-312.695	2.94	-87.8	5.38	15.3867	0	-1.928	-30.6	11.062	0
-312.717	-9.62	1	1.45	8.72454	0	0.376	-30.6	11.062	0
-312.756	7.964	-110	13.24	16.7847	0	2.68	-30.6	11.062	0
-312.778	-4.596	-21.2	9.31	10.1225	0	4.984	-30.6	11.062	0
-312.838	0.428	-43.4	17.17	11.5205	0	7.288	-30.6	11.062	0
-312.92	-7.108	23.2	21.1	6.25628	0	9.592	-30.6	11.062	0
-312.977	5.452	-110	3.415	17.1488	0	11.896	-30.6	11.062	0
-313.059	-2.084	-43.4	7.345	11.8846	0	14.2	-30.6	11.062	0
-313.119	2.94	-65.6	15.205	13.2826	0	-8.84	-10.2	11.062	0
-313.141	-9.62	23.2	11.275	6.62039	0	-6.536	-10.2	11.062	0
-313.202	-4.596	1	19.135	8.01837	0	-4.232	-10.2	11.062	0
-313.34	0.428	-65.6	5.38	13.6467	0	-1.928	-10.2	11.062	0
-313.401	5.452	-87.8	13.24	15.0447	0	0.376	-10.2	11.062	0
-313.423	-7.108	1	9.31	8.38248	0	2.68	-10.2	11.062	0
-313.461	10.476	-110	21.1	16.4427	0	4.984	-10.2	11.062	0
-313.483	-2.084	-21.2	17.17	9.78047	0	7.288	-10.2	11.062	0
-313.566	-9.62	45.4	21.1	4.51624	0	9.592	-10.2	11.062	0
-313.622	2.94	-87.8	3.415	15.4088	0	11.896	-10.2	11.062	0
-313.682	7.964	-110	11.275	16.8068	0	14.2	-10.2	11.062	0
-313.704	-4.596	-21.2	7.345	10.1446	0	-8.84	10.2	11.062	0
-313.765	0.428	-43.4	15.205	11.5426	0	-6.536	10.2	11.062	0
-313.847	-7.108	23.2	19.135	6.27834	0	-4.232	10.2	11.062	0
-313.903	5.452	-110	1.45	17.1709	0	-1.928	10.2	11.062	0
-313.986	-2.084	-43.4	5.38	11.9067	0	0.376	10.2	11.062	0
-314.046	2.94	-65.6	13.24	13.3047	0	2.68	10.2	11.062	0
-314.068	-9.62	23.2	9.31	6.64245	0	4.984	10.2	11.062	0
-314.106	7.964	-87.8	21.1	14.7026	0	7.288	10.2	11.062	0
-314.128	-4.596	1	17.17	8.04043	0	9.592	10.2	11.062	0
-314.267	0.428	-65.6	3.415	13.6688	0	11.896	10.2	11.062	0
-314.327	5.452	-87.8	11.275	15.0668	0	14.2	10.2	11.062	0
-314.349	-7.108	1	7.345	8.40454	0	-8.84	30.6	11.062	0
-314.388	10.476	-110	19.135	16.4647	0	-6.536	30.6	11.062	0
-314.41	-2.084	-21.2	15.205	9.80253	0	-4.232	30.6	11.062	0
-314.492	-9.62	45.4	19.135	4.5383	0	-1.928	30.6	11.062	0
-314.548	2.94	-87.8	1.45	15.4309	0	0.376	30.6	11.062	0
-314.609	7.964	-110	9.31	16.8288	0	2.68	30.6	11.062	0
-314.631	-4.596	-21.2	5.38	10.1666	0	4.984	30.6	11.062	0
-314.691	0.428	-43.4	13.24	11.5646	0	7.288	30.6	11.062	0
-314.751	5.452	-65.6	21.1	12.9626	0	9.592	30.6	11.062	0
-314.774	-7.108	23.2	17.17	6.3004	0	11.896	30.6	11.062	0
-314.912	-2.084	-43.4	3.415	11.9287	0	14.2	30.6	11.062	0
-314.973	2.94	-65.6	11.275	13.3267	0	-8.84	51	11.062	0
-314.995	-9.62	23.2	7.345	6.66451	0	-6.536	51	11.062	0
-315.033	7.964	-87.8	19.135	14.7247	0	-4.232	51	11.062	0
-315.055	-4.596	1	15.205	8.06249	0	-1.928	51	11.062	0
-315.194	0.428	-65.6	1.45	13.6908	0	0.376	51	11.062	0
-315.254	5.452	-87.8	9.31	15.0888	0	2.68	51	11.062	0
-315.276	-7.108	1	5.38	8.4266	0	4.984	51	11.062	0
-315.314	10.476	-110	17.17	16.4868	0	7.288	51	11.062	0
-315.336	-2.084	-21.2	13.24	9.82459	0	9.592	51	11.062	0
-315.397	2.94	-43.4	21.1	11.2226	0	11.896	51	11.062	0
-315.419	-9.62	45.4	17.17	4.56036	0	14.2	51	11.062	0
-315.535	7.964	-110	7.345	16.8509	0	-8.84	-153	13.035	0
-315.557	-4.596	-21.2	3.415	10.1887	0	-6.536	-153	13.035	0
-315.618	0.428	-43.4	11.275	11.5867	0	-4.232	-153	13.035	0
-315.678	5.452	-65.6	19.135	12.9847	0	-1.928	-153	13.035	0
-315.7	-7.108	23.2	15.205	6.32246	0	0.376	-153	13.035	0
-315.839	-2.084	-43.4	1.45	11.9508	0	2.68	-153	13.035	0
-315.899	2.94	-65.6	9.31	13.3488	0	4.984	-153	13.035	0
-315.921	-9.62	23.2	5.38	6.68657	0	7.288	-153	13.035	0
-315.959	7.964	-87.8	17.17	14.7468	0	9.592	-153	13.035	0
-315.981	-4.596	1	13.24	8.08455	0	11.896	-153	13.035	0
-316.042	0.428	-21.2	21.1	9.48253	0	14.2	-153	13.035	0
-316.18	5.452	-87.8	7.345	15.1109	0	-8.84	-132.6	13.035	0
-316.203	-7.108	1	3.415	8.44866	0	-6.536	-132.6	13.035	0
-316.241	10.476	-110	15.205	16.5089	0	-4.232	-132.6	13.035	0
-316.263	-2.084	-21.2	11.275	9.84665	0	-1.928	-132.6	13.035	0
-316.323	2.94	-43.4	19.135	11.2446	0	0.376	-132.6	13.035	0
-316.345	-9.62	45.4	15.205	4.58242	0	2.68	-132.6	13.035	0
-316.462	7.964	-110	5.38	16.873	0	4.984	-132.6	13.035	0
-316.484	-4.596	-21.2	1.45	10.2108	0	7.288	-132.6	13.035	0
-316.544	0.428	-43.4	9.31	11.6087	0	9.592	-132.6	13.035	0
-316.605	5.452	-65.6	17.17	13.0067	0	11.896	-132.6	13.035	0
-316.627	-7.108	23.2	13.24	6.34452	0	14.2	-132.6	13.035	0
-316.687	-2.084	1	21.1	7.7425	0	-8.84	-112.2	13.035	0
-316.826	2.94	-65.6	7.345	13.3708	0	-6.536	-112.2	13.035	0
-316.848	-9.62	23.2	3.415	6.70863	0	-4.232	-112.2	13.035	0
-316.886	7.964	-87.8	15.205	14.7688	0	-1.928	-112.2	13.035	0
-316.908	-4.596	1	11.275	8.10661	0	0.376	-112.2	13.035	0
-316.968	0.428	-21.2	19.135	9.50459	0	2.68	-112.2	13.035	0
-317.107	5.452	-87.8	5.38	15.1329	0	4.984	-112.2	13.035	0
-317.129	-7.108	1	1.45	8.47072	0	7.288	-112.2	13.035	0
-317.167	10.476	-110	13.24	16.5309	0	9.592	-112.2	13.035	0
-317.189	-2.084	-21.2	9.31	9.86871	0	11.896	-112.2	13.035	0
-317.25	2.94	-43.4	17.17	11.2667	0	14.2	-112.2	13.035	0
-317.272	-9.62	45.4	13.24	4.60448	0	-8.84	-91.8	13.035	0
-317.332	-4.596	23.2	21.1	6.00246	0	-6.536	-91.8	13.035	0
-317.388	7.964	-110	3.415	16.895	0	-4.232	-91.8	13.035	0
-317.471	0.428	-43.4	7.345	11.6308	0	-1.928	-91.8	13.035	0
-317.531	5.452	-65.6	15.205	13.0288	0	0.376	-91.8	13.035	0
-317.553	-7.108	23.2	11.275	6.36658	0	2.68	-91.8	13.035	0
-317.614	-2.084	1	19.135	7.76456	0	4.984	-91.8	13.035	0
-317.752	2.94	-65.6	5.38	13.3929	0	7.288	-91.8	13.035	0
-317.774	-9.62	23.2	1.45	6.73069	0	9.592	-91.8	13.035	0
-317.813	7.964	-87.8	13.24	14.7909	0	11.896	-91.8	13.035	0
-317.835	-4.596	1	9.31	8.12867	0	14.2	-91.8	13.035	0
-317.873	12.988	-110	21.1	16.1889	0	-8.84	-71.4	13.035	0
-317.895	0.428	-21.2	17.17	9.52665	0	-6.536	-71.4	13.035	0
-317.977	-7.108	45.4	21.1	4.26243	0	-4.232	-71.4	13.035	0
-318.034	5.452	-87.8	3.415	15.155	0	-1.928	-71.4	13.035	0
-318.094	10.476	-110	11.275	16.553	0	0.376	-71.4	13.035	0
-318.116	-2.084	-21.2	7.345	9.89077	0	2.68	-71.4	13.035	0
-318.176	2.94	-43.4	15.205	11.2887	0	4.984	-71.4	13.035	0
-318.198	-9.62	45.4	11.275	4.62654	0	7.288	-71.4	13.035	0
-318.259	-4.596	23.2	19.135	6.02452	0	9.592	-71.4	13.035	0
-318.315	7.964	-110	1.45	16.9171	0	11.896	-71.4	13.035	0
-318.397	0.428	-43.4	5.38	11.6529	0	14.2	-71.4	13.035	0
-318.458	5.452	-65.6	13.24	13.0508	0	-8.84	-51	13.035	0
-318.48	-7.108	23.2	9.31	6.38864	0	-6.536	-51	13.035	0
-318.518	10.476	-87.8	21.1	14.4488	0	-4.232	-51	13.035	0
-318.54	-2.084	1	17.17	7.78662	0	-1.928	-51	13.035	0
-318.623	-9.62	67.6	21.1	2.52245	0	0.376	-51	13.035	0
-318.679	2.94	-65.6	3.415	13.415	0	2.68	-51	13.035	0
-318.739	7.964	-87.8	11.275	14.8129	0	4.984	-51	13.035	0
-318.761	-4.596	1	7.345	8.15073	0	7.288	-51	13.035	0
-318.799	12.988	-110	19.135	16.2109	0	9.592	-51	13.035	0
-318.822	0.428	-21.2	15.205	9.54871	0	11.896	-51	13.035	0
-318.904	-7.108	45.4	19.135	4.28449	0	14.2	-51	13.035	0
-318.96	5.452	-87.8	1.45	15.1771	0	-8.84	-30.6	13.035	0
-319.02	10.476	-110	9.31	16.575	0	-6.536	-30.6	13.035	0
-319.043	-2.084	-21.2	5.38	9.91283	0	-4.232	-30.6	13.035	0
-319.103	2.94	-43.4	13.24	11.3108	0	-1.928	-30.6	13.035	0
-319.125	-9.62	45.4	9.31	4.6486	0	0.376	-30.6	13.035	0
-319.163	7.964	-65.6	21.1	12.7088	0	2.68	-30.6	13.035	0
-319.185	-4.596	23.2	17.17	6.04658	0	4.984	-30.6	13.035	0
-319.324	0.428	-43.4	3.415	11.6749	0	7.288	-30.6	13.035	0
-319.384	5.452	-65.6	11.275	13.0729	0	9.592	-30.6	13.035	0
-319.406	-7.108	23.2	7.345	6.4107	0	11.896	-30.6	13.035	0
-319.445	10.476	-87.8	19.135	14.4709	0	14.2	-30.6	13.035	0
-319.467	-2.084	1	15.205	7.80868	0	-8.84	-10.2	13.035	0
-319.549	-9.62	67.6	19.135	2.54451	0	-6.536	-10.2	13.035	0
-319.605	2.94	-65.6	1.45	13.437	0	-4.232	-10.2	13.035	0
-319.666	7.964	-87.8	9.31	14.835	0	-1.928	-10.2	13.035	0
-319.688	-4.596	1	5.38	8.17279	0	0.376	-10.2	13.035	0
-319.726	12.988	-110	17.17	16.233	0	2.68	-10.2	13.035	0
-319.748	0.428	-21.2	13.24	9.57077	0	4.984	-10.2	13.035	0
-319.808	5.452	-43.4	21.1	10.9688	0	7.288	-10.2	13.035	0
-319.83	-7.108	45.4	17.17	4.30655	0	9.592	-10.2	13.035	0
-319.947	10.476	-110	7.345	16.5971	0	11.896	-10.2	13.035	0
-319.969	-2.084	-21.2	3.415	9.93489	0	14.2	-10.2	13.035	0
-320.029	2.94	-43.4	11.275	11.3329	0	-8.84	10.2	13.035	0
-320.051	-9.62	45.4	7.345	4.67066	0	-6.536	10.2	13.035	0
-320.09	7.964	-65.6	19.135	12.7309	0	-4.232	10.2	13.035	0
-320.112	-4.596	23.2	15.205	6.06864	0	-1.928	10.2	13.035	0
-320.25	0.428	-43.4	1.45	11.697	0	0.376	10.2	13.035	0
-320.311	5.452	-65.6	9.31	13.095	0	2.68	10.2	13.035	0
-320.333	-7.108	23.2	5.38	6.43276	0	4.984	10.2	13.035	0
-320.371	10.476	-87.8	17.17	14.4929	0	7.288	10.2	13.035	0
-320.393	-2.084	1	13.24	7.83074	0	9.592	10.2	13.035	0
-320.454	2.94	-21.2	21.1	9.22872	0	11.896	10.2	13.035	0
-320.476	-9.62	67.6	17.17	2.56657	0	14.2	10.2	13.035	0
-320.592	7.964	-87.8	7.345	14.8571	0	-8.84	30.6	13.035	0
-320.614	-4.596	1	3.415	8.19485	0	-6.536	30.6	13.035	0
-320.653	12.988	-110	15.205	16.255	0	-4.232	30.6	13.035	0
-320.675	0.428	-21.2	11.275	9.59283	0	-1.928	30.6	13.035	0
-320.735	5.452	-43.4	19.135	10.9908	0	0.376	30.6	13.035	0
-320.757	-7.108	45.4	15.205	4.32861	0	2.68	30.6	13.035	0
-320.874	10.476	-110	5.38	16.6192	0	4.984	30.6	13.035	0
-320.896	-2.084	-21.2	1.45	9.95695	0	7.288	30.6	13.035	0
-320.956	2.94	-43.4	9.31	11.3549	0	9.592	30.6	13.035	0
-320.978	-9.62	45.4	5.38	4.69272	0	11.896	30.6	13.035	0
-321.016	7.964	-65.6	17.17	12.7529	0	14.2	30.6	13.035	0
-321.038	-4.596	23.2	13.24	6.09071	0	-8.84	51	13.035	0
-321.099	0.428	1	21.1	7.48869	0	-6.536	51	13.035	0
-321.237	5.452	-65.6	7.345	13.117	0	-4.232	51	13.035	0
-321.259	-7.108	23.2	3.415	6.45482	0	-1.928	51	13.035	0
-321.298	10.476	-87.8	15.205	14.515	0	0.376	51	13.035	0
-321.32	-2.084	1	11.275	7.8528	0	2.68	51	13.035	0
-321.38	2.94	-21.2	19.135	9.25078	0	4.984	51	13.035	0
-321.402	-9.62	67.6	15.205	2.58863	0	7.288	51	13.035	0
-321.519	7.964	-87.8	5.38	14.8791	0	9.592	51	13.035	0
-321.541	-4.596	1	1.45	8.21691	0	11.896	51	13.035	0
-321.579	12.988	-110	13.24	16.2771	0	14.2	51	13.035	0
-321.601	0.428	-21.2	9.31	9.6149	0	-8.84	-153	15.008	0
-321.662	5.452	-43.4	17.17	11.0129	0	-6.536	-153	15.008	0
-321.684	-7.108	45.4	13.24	4.35067	0	-4.232	-153	15.008	0
-321.744	-2.084	23.2	21.1	5.74865	0	-1.928	-153	15.008	0
-321.8	10.476	-110	3.415	16.6412	0	0.376	-153	15.008	0
-321.883	2.94	-43.4	7.345	11.377	0	2.68	-153	15.008	0
-321.905	-9.62	45.4	3.415	4.71478	0	4.984	-153	15.008	0
-321.943	7.964	-65.6	15.205	12.775	0	7.288	-153	15.008	0
-321.965	-4.596	23.2	11.275	6.11277	0	9.592	-153	15.008	0
-322.025	0.428	1	19.135	7.51075	0	11.896	-153	15.008	0
-322.164	5.452	-65.6	5.38	13.1391	0	14.2	-153	15.008	0
-322.186	-7.108	23.2	1.45	6.47688	0	-8.84	-132.6	15.008	0
-322.224	10.476	-87.8	13.24	14.5371	0	-6.536	-132.6	15.008	0
-322.246	-2.084	1	9.31	7.87486	0	-4.232	-132.6	15.008	0
-322.285	15.5	-110	21.1	15.935	0	-1.928	-132.6	15.008	0
-322.307	2.94	-21.2	17.17	9.27284	0	0.376	-132.6	15.008	0
-322.329	-9.62	67.6	13.24	2.61069	0	2.68	-132.6	15.008	0
-322.389	-4.596	45.4	21.1	4.00862	0	4.984	-132.6	15.008	0
-322.445	7.964	-87.8	3.415	14.9012	0	7.288	-132.6	15.008	0
-322.506	12.988	-110	11.275	16.2992	0	9.592	-132.6	15.008	0
-322.528	0.428	-21.2	7.345	9.63696	0	11.896	-132.6	15.008	0
-322.588	5.452	-43.4	15.205	11.0349	0	14.2	-132.6	15.008	0
-322.61	-7.108	45.4	11.275	4.37273	0	-8.84	-112.2	15.008	0
-322.67	-2.084	23.2	19.135	5.77071	0	-6.536	-112.2	15.008	0
-322.727	10.476	-110	1.45	16.6633	0	-4.232	-112.2	15.008	0
-322.809	2.94	-43.4	5.38	11.3991	0	-1.928	-112.2	15.008	0
-322.831	-9.62	45.4	1.45	4.73684	0	0.376	-112.2	15.008	0
-322.869	7.964	-65.6	13.24	12.797	0	2.68	-112.2	15.008	0
-322.892	-4.596	23.2	9.31	6.13483	0	4.984	-112.2	15.008	0
-322.93	12.988	-87.8	21.1	14.195	0	7.288	-112.2	15.008	0
-322.952	0.428	1	17.17	7.53281	0	9.592	-112.2	15.008	0
-323.034	-7.108	67.6	21.1	2.26863	0	11.896	-112.2	15.008	0
-323.09	5.452	-65.6	3.415	13.1611	0	14.2	-112.2	15.008	0
-323.151	10.476	-87.8	11.275	14.5591	0	-8.84	-91.8	15.008	0
-323.173	-2.084	1	7.345	7.89692	0	-6.536	-91.8	15.008	0
-323.211	15.5	-110	19.135	15.9571	0	-4.232	-91.8	15.008	0
-323.233	2.94	-21.2	15.205	9.2949	0	-1.928	-91.8	15.008	0
-323.255	-9.62	67.6	11.275	2.63275	0	0.376	-91.8	15.008	0
-323.316	-4.596	45.4	19.135	4.03068	0	2.68	-91.8	15.008	0
-323.372	7.964	-87.8	1.45	14.9232	0	4.984	-91.8	15.008	0
-323.432	12.988	-110	9.31	16.3212	0	7.288	-91.8	15.008	0
-323.454	0.428	-21.2	5.38	9.65902	0	9.592	-91.8	15.008	0
-323.515	5.452	-43.4	13.24	11.057	0	11.896	-91.8	15.008	0
-323.537	-7.108	45.4	9.31	4.39479	0	14.2	-91.8	15.008	0
-323.575	10.476	-65.6	21.1	12.455	0	-8.84	-71.4	15.008	0
-323.597	-2.084	23.2	17.17	5.79277	0	-6.536	-71.4	15.008	0
-323.679	-9.62	89.8	21.1	0.528561	0	-4.232	-71.4	15.008	0
-323.736	2.94	-43.4	3.415	11.4211	0	-1.928	-71.4	15.008	0
-323.796	7.964	-65.6	11.275	12.8191	0	0.376	-71.4	15.008	0
-323.818	-4.596	23.2	7.345	6.15689	0	2.68	-71.4	15.008	0
-323.856	12.988	-87.8	19.135	14.2171	0	4.984	-71.4	15.008	0
-323.878	0.428	1	15.205	7.55487	0	7.288	-71.4	15.008	0
-323.961	-7.108	67.6	19.135	2.29069	0	9.592	-71.4	15.008	0
-324.017	5.452	-65.6	1.45	13.1832	0	11.896	-71.4	15.008	0
-324.077	10.476	-87.8	9.31	14.5812	0	14.2	-71.4	15.008	0
-324.099	-2.084	1	5.38	7.91898	0	-8.84	-51	15.008	0
-324.138	15.5	-110	17.17	15.9792	0	-6.536	-51	15.008	0
-324.16	2.94	-21.2	13.24	9.31696	0	-4.232	-51	15.008	0
-324.182	-9.62	67.6	9.31	2.65482	0	-1.928	-51	15.008	0
-324.22	7.964	-43.4	21.1	10.7149	0	0.376	-51	15.008	0
-324.242	-4.596	45.4	17.17	4.05274	0	2.68	-51	15.008	0
-324.359	12.988	-110	7.345	16.3433	0	4.984	-51	15.008	0
-324.381	0.428	-21.2	3.415	9.68108	0	7.288	-51	15.008	0
-324.441	5.452	-43.4	11.275	11.0791	0	9.592	-51	15.008	0
-324.463	-7.108	45.4	7.345	4.41685	0	11.896	-51	15.008	0
-324.502	10.476	-65.6	19.135	12.477	0	14.2	-51	15.008	0
-324.524	-2.084	23.2	15.205	5.81483	0	-8.84	-30.6	15.008	0
-324.606	-9.62	89.8	19.135	0.550621	0	-6.536	-30.6	15.008	0
-324.662	2.94	-43.4	1.45	11.4432	0	-4.232	-30.6	15.008	0
-324.723	7.964	-65.6	9.31	12.8412	0	-1.928	-30.6	15.008	0
-324.745	-4.596	23.2	5.38	6.17895	0	0.376	-30.6	15.008	0
-324.783	12.988	-87.8	17.17	14.2391	0	2.68	-30.6	15.008	0
-324.805	0.428	1	13.24	7.57693	0	4.984	-30.6	15.008	0
-324.865	5.452	-21.2	21.1	8.97491	0	7.288	-30.6	15.008	0
-324.887	-7.108	67.6	17.17	2.31276	0	9.592	-30.6	15.008	0
-325.004	10.476	-87.8	7.345	14.6032	0	11.896	-30.6	15.008	0
-325.026	-2.084	1	3.415	7.94104	0	14.2	-30.6	15.008	0
-325.064	15.5	-110	15.205	16.0012	0	-8.84	-10.2	15.008	0
-325.086	2.94	-21.2	11.275	9.33902	0	-6.536	-10.2	15.008	0
-325.108	-9.62	67.6	7.345	2.67688	0	-4.232	-10.2	15.008	0
-325.147	7.964	-43.4	19.135	10.737	0	-1.928	-10.2	15.008	0
-325.169	-4.596	45.4	15.205	4.0748	0	0.376	-10.2	15.008	0
-325.285	12.988	-110	5.38	16.3653	0	2.68	-10.2	15.008	0
-325.307	0.428	-21.2	1.45	9.70314	0	4.984	-10.2	15.008	0
-325.368	5.452	-43.4	9.31	11.1011	0	7.288	-10.2	15.008	0
-325.39	-7.108	45.4	5.38	4.43891	0	9.592	-10.2	15.008	0
-325.428	10.476	-65.6	17.17	12.4991	0	11.896	-10.2	15.008	0
-325.45	-2.084	23.2	13.24	5.83689	0	14.2	-10.2	15.008	0
-325.51	2.94	1	21.1	7.23488	0	-8.84	10.2	15.008	0
-325.533	-9.62	89.8	17.17	0.572682	0	-6.536	10.2	15.008	0
-325.649	7.964	-65.6	7.345	12.8632	0	-4.232	10.2	15.008	0
-325.671	-4.596	23.2	3.415	6.20101	0	-1.928	10.2	15.008	0
-325.709	12.988	-87.8	15.205	14.2612	0	0.376	10.2	15.008	0
-325.732	0.428	1	11.275	7.59899	0	2.68	10.2	15.008	0
-325.792	5.452	-21.2	19.135	8.99697	0	4.984	10.2	15.008	0
-325.814	-7.108	67.6	15.205	2.33482	0	7.288	10.2	15.008	0
-325.93	10.476	-87.8	5.38	14.6253	0	9.592	10.2	15.008	0
-325.953	-2.084	1	1.45	7.9631	0	11.896	10.2	15.008	0
-325.991	15.5	-110	13.24	16.0233	0	14.2	10.2	15.008	0
-326.013	2.94	-21.2	9.31	9.36108	0	-8.84	30.6	15.008	0
-326.035	-9.62	67.6	5.38	2.69894	0	-6.536	30.6	15.008	0
-326.073	7.964	-43.4	17.17	10.7591	0	-4.232	30.6	15.008	0
-326.095	-4.596	45.4	13.24	4.09686	0	-1.928	30.6	15.008	0
-326.156	0.428	23.2	21.1	5.49484	0	0.376	30.6	15.008	0
-326.212	12.988	-110	3.415	16.3874	0	2.68	30.6	15.008	0
-326.294	5.452	-43.4	7.345	11.1232	0	4.984	30.6	15.008	0
-326.316	-7.108	45.4	3.415	4.46097	0	7.288	30.6	15.008	0
-326.355	10.476	-65.6	15.205	12.5212	0	9.592	30.6	15.008	0
-326.377	-2.084	23.2	11.275	5.85895	0	11.896	30.6	15.008	0
-326.437	2.94	1	19.135	7.25694	0	14.2	30.6	15.008	0
-326.459	-9.62	89.8	15.205	0.594743	0	-8.84	51	15.008	0
-326.576	7.964	-65.6	5.38	12.8853	0	-6.536	51	15.008	0
-326.598	-4.596	23.2	1.45	6.22307	0	-4.232	51	15.008	0
-326.636	12.988	-87.8	13.24	14.2833	0	-1.928	51	15.008	0
-326.658	0.428	1	9.31	7.62105	0	0.376	51	15.008	0
-326.718	5.452	-21.2	17.17	9.01903	0	2.68	51	15.008	0
-326.741	-7.108	67.6	13.24	2.35688	0	4.984	51	15.008	0
-326.801	-2.084	45.4	21.1	3.75481	0	7.288	51	15.008	0
-326.857	10.476	-87.8	3.415	14.6474	0	9.592	51	15.008	0
-326.917	15.5	-110	11.275	16.0454	0	11.896	51	15.008	0
[truncated: 549 more rows]

## Sheet: Opt_Flux
growth condition:		light	dark
[truncated: 1,154 more rows]

[truncated: 1 more sheets: Annotation Summary]
